# Supplementary material for: Molecular characterization of an adiponectin receptor homolog in the white leg shrimp, Litopenaeus vannamei
Source: PeerJ. 2016 Jul 14;4:e2221. doi: 10.7717/peerj.2221 (PMC4950565; doi:10.7717/peerj.2221)
Supplement: Data S1 — Excel file. [file peerj-04-2221-s001.xlsx]

## Sheet: Lv_cont vs. Lv_exp
Feature ID	Experiment - Range (original values)	Experiment - IQR (original values)	Experiment - Difference (original values)	Experiment - Fold Change (original values)	Experiment - Range (transformed values)	Experiment - IQR (transformed values)	Experiment - Difference (transformed values)	Experiment - Fold Change (Transformed values)	Experiment - Range (normalized values)	Experiment - IQR (normalized values)	Experiment - Difference (normalized values)	Experiment - Fold Change (normalized values)	Kal's Z-test:Lv_exp vs Lv_cont normalized values - Proportions difference	Kal's Z-test:Lv_exp vs Lv_cont normalized values - Proportions fold change	Kal's Z-test:Lv_exp vs Lv_cont normalized values - Test statistic	Kal's Z-test:Lv_exp vs Lv_cont normalized values - P-value	Kal's Z-test:Lv_exp vs Lv_cont normalized values - FDR p-value correction	Baggerley's test: Lv_exp vs Lv_cont normalized values - Weighted proportions difference	Baggerley's test: Lv_exp vs Lv_cont normalized values - Weighted proportions fold change	Baggerley's test: Lv_exp vs Lv_cont normalized values - Test statistic	Baggerley's test: Lv_exp vs Lv_cont normalized values - P-value	Baggerley's test: Lv_exp vs Lv_cont normalized values - FDR p-value correction	Lv_cont - Lv-fl-adi-c_S1_L001_R1_001 (paired) trimmed (paired) (GE) - Expression values	Lv_cont - Lv-fl-adi-c_S1_L001_R1_001 (paired) trimmed (paired) (GE) - Normalized expression values	Lv_cont - Lv-fl-adi-c_S1_L001_R1_001 (paired) trimmed (paired) (GE) - Transformed values	Lv_cont - Lv-fl-adi-c_S1_L001_R1_001 (paired) trimmed (paired) (GE) - Unique gene reads	Lv_cont - Lv-fl-adi-c_S1_L001_R1_001 (paired) trimmed (paired) (GE) - Total gene reads	Lv_cont - Lv-fl-adi-c_S1_L001_R1_001 (paired) trimmed (paired) (GE) - RPKM	Lv_cont - Lv-fl-adi-c_S1_L001_R1_001 (paired) trimmed (paired) (GE) - Chromosome	Lv_cont - Lv-fl-adi-c_S1_L001_R1_001 (paired) trimmed (paired) (GE) - Chromosome region start	Lv_cont - Lv-fl-adi-c_S1_L001_R1_001 (paired) trimmed (paired) (GE) - Chromosome region end	Lv_cont - Normalized means	Lv_cont - Transformed means	Lv_cont - Means	Lv_exp - Lv-fl-adi-ex_S2_L001_R1_001 (paired) trimmed (paired) (GE) - Expression values	Lv_exp - Lv-fl-adi-ex_S2_L001_R1_001 (paired) trimmed (paired) (GE) - Normalized expression values	Lv_exp - Lv-fl-adi-ex_S2_L001_R1_001 (paired) trimmed (paired) (GE) - Transformed values	Lv_exp - Lv-fl-adi-ex_S2_L001_R1_001 (paired) trimmed (paired) (GE) - Unique gene reads	Lv_exp - Lv-fl-adi-ex_S2_L001_R1_001 (paired) trimmed (paired) (GE) - Total gene reads	Lv_exp - Lv-fl-adi-ex_S2_L001_R1_001 (paired) trimmed (paired) (GE) - RPKM	Lv_exp - Lv-fl-adi-ex_S2_L001_R1_001 (paired) trimmed (paired) (GE) - Chromosome	Lv_exp - Lv-fl-adi-ex_S2_L001_R1_001 (paired) trimmed (paired) (GE) - Chromosome region start	Lv_exp - Lv-fl-adi-ex_S2_L001_R1_001 (paired) trimmed (paired) (GE) - Chromosome region end	Lv_exp - Normalized means	Lv_exp - Transformed means	Lv_exp - Means
contigs_merge_contig_1	5.30395	5.30395	5.30395	1.97427	0.981319	0.981319	0.981319	1.40141	7.5553	7.5553	7.5553	2.0149	7.5553e-06	2.0149	1.59479	0.110759	1	7.5553e-06	2.0149	1.59479	0.110759	1	5.44403	7.44439	2.44468	14	164	5.44403	contigs_merge_contig_1	0	1764	7.44439	2.44468	5.44403	10.748	14.9997	3.42599	39	298	10.748	contigs_merge_contig_1	0	1764	14.9997	3.42599	10.748
contigs_merge_contig_10	0	0	0	1	#NUM!	0	#NUM!	#NUM!	0	0	0	1	0	1	0	1	1	0	1	0	1	1	0	0	#DIV/0!	0	0	0	contigs_merge_contig_10	0	1158	0	#DIV/0!	0	0	0	#DIV/0!	0	0	0	contigs_merge_contig_10	0	1158	0	#DIV/0!	0
contigs_merge_contig_100	0.291509	0.291509	0.291509	1.12355	0.168066	0.168066	0.168066	1.13571	0.47322	0.47322	0.47322	1.14667	4.7322e-07	1.14667	0.179814	0.857298	1	4.7322e-07	1.14667	0.179814	0.857298	1	2.35942	3.22637	1.23843	88	88	2.35942	contigs_merge_contig_100	0	2184	3.22637	1.23843	2.35942	2.65093	3.69959	1.4065	91	91	2.65093	contigs_merge_contig_100	0	2184	3.69959	1.4065	2.65093
contigs_merge_contig_1000	0	0	0	1	#NUM!	0	#NUM!	#NUM!	0	0	0	1	0	1	0	1	1	0	1	0	1	1	0	0	#DIV/0!	0	0	0	contigs_merge_contig_1000	0	1242	0	#DIV/0!	0	0	0	#DIV/0!	0	0	0	contigs_merge_contig_1000	0	1242	0	#DIV/0!	0
contigs_merge_contig_10000	0.456619	0.456619	0.456619	#DIV/0!	#DIV/0!	0	#DIV/0!	0	0.63725	0.63725	0.63725	#DIV/0!	6.3725e-07	#DIV/0!	0.798279	0.424708	1	6.3725e-07	#DIV/0!	0.798279	0.424709	1	0	0	#DIV/0!	0	0	0	contigs_merge_contig_10000	0	418	0	#DIV/0!	0	0.456619	0.63725	-1.13094	3	3	0.456619	contigs_merge_contig_10000	0	418	0.63725	-1.13094	0.456619
contigs_merge_contig_10001	0.15365	0.15365	-0.15365	-1.208	0.272615	0.272615	-0.272615	-0.376024	0.189319	0.189319	-0.189319	-1.18364	-1.89319e-07	-1.18364	-0.126179	0.89959	1	-1.89319e-07	-1.18364	-0.126179	0.89959	1	0.892371	1.22026	-0.164285	21	21	0.892371	contigs_merge_contig_10001	0	1378	1.22026	-0.164285	0.892371	0.73872	1.03094	-0.4369	16	16	0.73872	contigs_merge_contig_10001	0	1378	1.03094	-0.4369	0.73872
contigs_merge_contig_10002	0.651707	0.651707	0.651707	1.48161	0.567162	0.567162	0.567162	2.29972	0.947591	0.947591	0.947591	1.5121	9.47591e-07	1.5121	0.43951	0.660292	1	9.47591e-07	1.5121	0.43951	0.660292	1	1.3532	1.85042	0.436372	11	11	1.3532	contigs_merge_contig_10002	0	476	1.85042	0.436372	1.3532	2.0049	2.79801	1.00353	15	15	2.0049	contigs_merge_contig_10002	0	476	2.79801	1.00353	2.0049
contigs_merge_contig_10003	0	0	0	1	#NUM!	0	#NUM!	#NUM!	0	0	0	1	0	1	0	1	1	0	1	0	1	1	0	0	#DIV/0!	0	0	0	contigs_merge_contig_10003	0	351	0	#DIV/0!	0	0	0	#DIV/0!	0	0	0	contigs_merge_contig_10003	0	351	0	#DIV/0!	0
contigs_merge_contig_10004	0.279658	0.279658	0.279658	#DIV/0!	#DIV/0!	0	#DIV/0!	0	0.390286	0.390286	0.390286	#DIV/0!	3.90286e-07	#DIV/0!	0.624729	0.532149	1	3.90286e-07	#DIV/0!	0.624729	0.532149	1	0	0	#DIV/0!	0	0	0	contigs_merge_contig_10004	0	455	0	#DIV/0!	0	0.279658	0.390286	-1.83826	2	2	0.279658	contigs_merge_contig_10004	0	455	0.390286	-1.83826	0.279658
contigs_merge_contig_10005	0.133386	0.133386	-0.133386	#DIV/0!	#DIV/0!	0	#DIV/0!	0	0.182398	0.182398	-0.182398	#DIV/0!	-1.82398e-07	#DIV/0!	-0.42708	0.669321	1	-1.82398e-07	#DIV/0!	-0.42708	0.669321	1	0.133386	0.182398	-2.90632	1	1	0.133386	contigs_merge_contig_10005	0	439	0.182398	-2.90632	0.133386	0	0	#DIV/0!	0	0	0	contigs_merge_contig_10005	0	439	0	#DIV/0!	0
contigs_merge_contig_10006	0.157066	0.157066	-0.157066	-2.14755	1.10269	1.10269	-1.10269	-0.615668	0.210927	0.210927	-0.210927	-2.10424	-2.10927e-07	-2.10424	-0.273918	0.784148	1	-2.10927e-07	-2.10424	-0.273918	0.784148	1	0.293937	0.401942	-1.76642	14	14	0.293937	contigs_merge_contig_10006	0	2789	0.401942	-1.76642	0.293937	0.136871	0.191015	-2.86911	6	6	0.136871	contigs_merge_contig_10006	0	2789	0.191015	-2.86911	0.136871
contigs_merge_contig_10007	0.386762	0.386762	0.386762	#DIV/0!	#DIV/0!	0	#DIV/0!	0	0.539757	0.539757	0.539757	#DIV/0!	5.39757e-07	#DIV/0!	0.734682	0.462533	1	5.39757e-07	#DIV/0!	0.734682	0.462533	1	0	0	#DIV/0!	0	0	0	contigs_merge_contig_10007	0	329	0	#DIV/0!	0	0.386762	0.539757	-1.37048	2	2	0.386762	contigs_merge_contig_10007	0	329	0.539757	-1.37048	0.386762
contigs_merge_contig_10008	0.219488	0.219488	0.219488	1.73842	0.797774	0.797774	0.797774	0.544205	0.314678	0.314678	0.314678	1.77419	3.14678e-07	1.77419	0.29634	0.766971	1	3.14678e-07	1.77419	0.29634	0.766971	1	0.297241	0.40646	-1.75029	2	5	0.297241	contigs_merge_contig_10008	0	985	0.40646	-1.75029	0.297241	0.516729	0.721138	-0.952519	3	8	0.516729	contigs_merge_contig_10008	0	985	0.721138	-0.952519	0.516729
contigs_merge_contig_10009	0.33433	0.33433	-0.33433	-1.56464	0.645832	0.645832	-0.645832	-0.145794	0.440514	0.440514	-0.440514	-1.53309	-4.40514e-07	-1.53309	-0.304478	0.760764	1	-4.40514e-07	-1.53309	-0.304478	0.760764	1	0.926441	1.26685	-0.110229	34	34	0.926441	contigs_merge_contig_10009	0	2149	1.26685	-0.110229	0.926441	0.592111	0.826339	-0.756061	20	20	0.592111	contigs_merge_contig_10009	0	2149	0.826339	-0.756061	0.592111
contigs_merge_contig_1001	0.238648	0.238648	0.238648	1.15894	0.212812	0.212812	0.212812	1.36294	0.375305	0.375305	0.375305	1.1828	3.75305e-07	1.1828	0.177283	0.859286	1	3.75305e-07	1.1828	0.177283	0.859286	1	1.50145	2.05314	0.586356	45	45	1.50145	contigs_merge_contig_1001	0	1755	2.05314	0.586356	1.50145	1.7401	2.42845	0.799168	48	48	1.7401	contigs_merge_contig_1001	0	1755	2.42845	0.799168	1.7401
contigs_merge_contig_10010	2.30433	2.30433	2.30433	1.69368	0.76016	0.76016	0.76016	1.43889	3.30936	3.30936	3.30936	1.72853	3.30936e-06	1.72853	0.940012	0.347212	1	3.30936e-06	1.72853	0.940012	0.347212	1	3.32189	4.54249	1.73201	202	204	3.32189	contigs_merge_contig_10010	0	3596	4.54249	1.73201	3.32189	5.62622	7.85185	2.49217	318	318	5.62622	contigs_merge_contig_10010	0	3596	7.85185	2.49217	5.62622
contigs_merge_contig_10011	0.139225	0.139225	0.139225	1.21434	0.280167	0.280167	0.280167	0.549896	0.21258	0.21258	0.21258	1.23933	2.1258e-07	1.23933	0.150729	0.880189	1	2.1258e-07	1.23933	0.150729	0.880189	1	0.649567	0.888244	-0.62245	4	34	0.649567	contigs_merge_contig_10011	0	3065	0.888244	-0.62245	0.649567	0.788792	1.10082	-0.342283	6	38	0.788792	contigs_merge_contig_10011	0	3065	1.10082	-0.342283	0.788792
contigs_merge_contig_10012	3.65162	3.65162	3.65162	1.90139	0.927057	0.927057	0.927057	1.45932	5.21013	5.21013	5.21013	1.94052	5.21013e-06	1.94052	1.29092	0.196732	1	5.21013e-06	1.94052	1.29092	0.196732	1	4.05108	5.53961	2.01831	44	44	4.05108	contigs_merge_contig_10012	0	636	5.53961	2.01831	4.05108	7.7027	10.7497	2.94536	77	77	7.7027	contigs_merge_contig_10012	0	636	10.7497	2.94536	7.7027
contigs_merge_contig_10013	0.0780464	0.0780464	0.0780464	1.62977	0.704665	0.704665	0.704665	0.766079	0.112408	0.112408	0.112408	1.66331	1.12408e-07	1.66331	0.167319	0.867119	1	1.12408e-07	1.66331	0.167319	0.867119	1	0.123929	0.169466	-3.01241	2	2	0.123929	contigs_merge_contig_10013	0	945	0.169466	-3.01241	0.123929	0.201976	0.281873	-2.30775	3	3	0.201976	contigs_merge_contig_10013	0	945	0.281873	-2.30775	0.201976
contigs_merge_contig_10014	0.077046	0.077046	0.077046	1.08651	0.119703	0.119703	0.119703	0.283908	0.132586	0.132586	0.132586	1.10887	1.32586e-07	1.10887	0.0827331	0.934064	1	1.32586e-07	1.10887	0.0827331	0.934064	1	0.890594	1.21783	-0.167161	4	4	0.890594	contigs_merge_contig_10014	0	263	1.21783	-0.167161	0.890594	0.96764	1.35042	-0.0474583	4	4	0.96764	contigs_merge_contig_10014	0	263	1.35042	-0.0474583	0.96764
contigs_merge_contig_10015	0.0307354	0.0307354	0.0307354	#DIV/0!	#DIV/0!	0	#DIV/0!	0	0.0428938	0.0428938	0.0428938	#DIV/0!	4.28938e-08	#DIV/0!	0.207108	0.835925	1	4.28938e-08	#DIV/0!	0.207108	0.835925	1	0	0	#DIV/0!	0	0	0	contigs_merge_contig_10015	0	2070	0	#DIV/0!	0	0.0307354	0.0428938	-5.02395	1	1	0.0307354	contigs_merge_contig_10015	0	2070	0.0428938	-5.02395	0.0307354
contigs_merge_contig_10016	0.144584	0.144584	-0.144584	#DIV/0!	#DIV/0!	0	#DIV/0!	0	0.19771	0.19771	-0.19771	#DIV/0!	-1.9771e-07	#DIV/0!	-0.444646	0.656576	1	-1.9771e-07	#DIV/0!	-0.444646	0.656576	1	0.144584	0.19771	-2.79002	1	1	0.144584	contigs_merge_contig_10016	0	405	0.19771	-2.79002	0.144584	0	0	#DIV/0!	0	0	0	contigs_merge_contig_10016	0	405	0	#DIV/0!	0
contigs_merge_contig_10017	0.223426	0.223426	0.223426	2.9879	1.57913	1.57913	1.57913	0.499225	0.314972	0.314972	0.314972	3.04939	3.14972e-07	3.04939	0.399258	0.689703	1	3.14972e-07	3.04939	0.399258	0.689703	1	0.112393	0.15369	-3.15338	4	4	0.112393	contigs_merge_contig_10017	0	2084	0.15369	-3.15338	0.112393	0.335818	0.468662	-1.57425	11	11	0.335818	contigs_merge_contig_10017	0	2084	0.468662	-1.57425	0.335818
contigs_merge_contig_10018	0.470403	0.470403	0.470403	1.42082	0.506726	0.506726	0.506726	4.1535	0.687942	0.687942	0.687942	1.45006	6.87942e-07	1.45006	0.355487	0.722225	1	6.87942e-07	1.45006	0.355487	0.722225	1	1.11782	1.52855	0.160687	26	26	1.11782	contigs_merge_contig_10018	0	1362	1.52855	0.160687	1.11782	1.58822	2.21649	0.667413	34	34	1.58822	contigs_merge_contig_10018	0	1362	2.21649	0.667413	1.58822
contigs_merge_contig_10019	1.21355	1.21355	1.21355	1.55216	0.634276	0.634276	0.634276	1.5583	1.75546	1.75546	1.75546	1.5841	1.75546e-06	1.5841	0.62992	0.528747	1	1.75546e-06	1.5841	0.62992	0.528747	1	2.19783	3.0054	1.13608	14	14	2.19783	contigs_merge_contig_10019	0	373	3.0054	1.13608	2.19783	3.41138	4.76086	1.77036	20	20	3.41138	contigs_merge_contig_10019	0	373	4.76086	1.77036	3.41138
contigs_merge_contig_1002	0.0479578	0.0479578	-0.0479578	#DIV/0!	#DIV/0!	0	#DIV/0!	0	0.0655795	0.0655795	-0.0655795	#DIV/0!	-6.55795e-08	#DIV/0!	-0.256085	0.797885	1	-6.55795e-08	#DIV/0!	-0.256085	0.797885	1	0.0479578	0.0655795	-4.38209	2	2	0.0479578	contigs_merge_contig_1002	0	2442	0.0655795	-4.38209	0.0479578	0	0	#DIV/0!	0	0	0	contigs_merge_contig_1002	0	2442	0	#DIV/0!	0
contigs_merge_contig_10020	0.381142	0.381142	0.381142	2.89736	1.53474	1.53474	1.53474	0.337215	0.537568	0.537568	0.537568	2.95699	5.37568e-07	2.95699	0.515619	0.606121	1	5.37568e-07	2.95699	0.515619	0.606121	1	0.20088	0.274691	-2.31559	6	6	0.20088	contigs_merge_contig_10020	0	1749	0.274691	-2.31559	0.20088	0.582022	0.812259	-0.780854	16	16	0.582022	contigs_merge_contig_10020	0	1749	0.812259	-0.780854	0.582022
contigs_merge_contig_10021	0	0	0	1	#NUM!	0	#NUM!	#NUM!	0	0	0	1	0	1	0	1	1	0	1	0	1	1	0	0	#DIV/0!	0	0	0	contigs_merge_contig_10021	0	339	0	#DIV/0!	0	0	0	#DIV/0!	0	0	0	contigs_merge_contig_10021	0	339	0	#DIV/0!	0
contigs_merge_contig_10022	0	0	0	1	#NUM!	0	#NUM!	#NUM!	0	0	0	1	0	1	0	1	1	0	1	0	1	1	0	0	#DIV/0!	0	0	0	contigs_merge_contig_10022	0	2358	0	#DIV/0!	0	0	0	#DIV/0!	0	0	0	contigs_merge_contig_10022	0	2358	0	#DIV/0!	0
contigs_merge_contig_10023	0.310995	0.310995	0.310995	1.15442	0.207165	0.207165	0.207165	1.2051	0.490694	0.490694	0.490694	1.17817	4.90694e-07	1.17817	0.200347	0.841209	1	4.90694e-07	1.17817	0.200347	0.841209	1	2.01398	2.754	1.01005	59	80	2.01398	contigs_merge_contig_10023	0	2326	2.754	1.01005	2.01398	2.32498	3.24469	1.21722	56	85	2.32498	contigs_merge_contig_10023	0	2326	3.24469	1.21722	2.32498
contigs_merge_contig_10024	2.58421	2.58421	-2.58421	-1.16928	0.225626	0.225626	-0.225626	-1.05738	3.10417	3.10417	-3.10417	-1.14571	-3.10417e-06	-1.14571	-0.459127	0.646143	1	-3.10417e-06	-1.14571	-0.459127	0.646143	1	17.8497	24.4084	4.15783	9	606	17.8497	contigs_merge_contig_10024	0	1988	24.4084	4.15783	17.8497	15.2655	21.3043	3.9322	4	477	15.2655	contigs_merge_contig_10024	0	1988	21.3043	3.9322	15.2655
contigs_merge_contig_10025	0.335245	0.335245	0.335245	1.62977	0.704665	0.704665	0.704665	0.225304	0.482842	0.482842	0.482842	1.66331	4.82842e-07	1.66331	0.346776	0.72876	1	4.82842e-07	1.66331	0.346776	0.72876	1	0.532332	0.727932	-0.909602	2	2	0.532332	contigs_merge_contig_10025	0	220	0.727932	-0.909602	0.532332	0.867577	1.21077	-0.204937	3	3	0.867577	contigs_merge_contig_10025	0	220	1.21077	-0.204937	0.867577
contigs_merge_contig_10026	0.0274429	0.0274429	-0.0274429	-1.01899	0.0271389	0.0271389	-0.0271389	-1.05109	0.00314222	0.00314222	0.00314222	1.00156	3.14222e-09	1.00156	0.00156514	0.998751	1	3.14222e-09	1.00156	0.00156514	0.998751	1	1.47262	2.01372	0.558387	93	93	1.47262	contigs_merge_contig_10026	0	3698	2.01372	0.558387	1.47262	1.44518	2.01687	0.531249	84	84	1.44518	contigs_merge_contig_10026	0	3698	2.01687	0.531249	1.44518
contigs_merge_contig_10027	0.20988	0.20988	-0.20988	#DIV/0!	#DIV/0!	0	#DIV/0!	0	0.286998	0.286998	-0.286998	#DIV/0!	-2.86998e-07	#DIV/0!	-0.535722	0.59215	1	-2.86998e-07	#DIV/0!	-0.535722	0.592151	1	0.20988	0.286998	-2.25236	1	1	0.20988	contigs_merge_contig_10027	0	279	0.286998	-2.25236	0.20988	0	0	#DIV/0!	0	0	0	contigs_merge_contig_10027	0	279	0	#DIV/0!	0
contigs_merge_contig_10028	0.2862	0.2862	0.2862	2.17302	1.1197	1.1197	1.1197	0.449813	0.406282	0.406282	0.406282	2.21774	4.06282e-07	2.21774	0.392117	0.694972	1	4.06282e-07	2.21774	0.392117	0.694972	1	0.243986	0.333636	-2.03513	1	1	0.243986	contigs_merge_contig_10028	0	240	0.333636	-2.03513	0.243986	0.530186	0.739918	-0.91543	2	2	0.530186	contigs_merge_contig_10028	0	240	0.739918	-0.91543	0.530186
contigs_merge_contig_10029	0.289823	0.289823	0.289823	2.17302	1.1197	1.1197	1.1197	0.444863	0.411425	0.411425	0.411425	2.21774	4.11425e-07	2.21774	0.394591	0.693145	1	4.11425e-07	2.21774	0.394591	0.693145	1	0.247074	0.337859	-2.01699	3	3	0.247074	contigs_merge_contig_10029	0	711	0.337859	-2.01699	0.247074	0.536897	0.749284	-0.897283	6	6	0.536897	contigs_merge_contig_10029	0	711	0.749284	-0.897283	0.536897
contigs_merge_contig_1003	0.294623	0.294623	0.294623	4.8893	2.28963	2.28963	2.28963	0.384933	0.413303	0.413303	0.413303	4.98992	4.13303e-07	4.98992	0.524693	0.599796	1	4.13303e-07	4.98992	0.524694	0.599796	1	0.0757523	0.103587	-3.72257	2	2	0.0757523	contigs_merge_contig_1003	0	1546	0.103587	-3.72257	0.0757523	0.370376	0.516889	-1.43294	9	9	0.370376	contigs_merge_contig_1003	0	1546	0.516889	-1.43294	0.370376
contigs_merge_contig_10030	0.661791	0.661791	-0.661791	-1.53396	0.617263	0.617263	-0.617263	-2.99351	0.870081	0.870081	-0.870081	-1.50303	-8.70081e-07	-1.50303	-0.418162	0.675829	1	-8.70081e-07	-1.50303	-0.418162	0.675829	1	1.90119	2.59976	0.9269	10	10	1.90119	contigs_merge_contig_10030	0	308	2.59976	0.9269	1.90119	1.2394	1.72968	0.309637	6	6	1.2394	contigs_merge_contig_10030	0	308	1.72968	0.309637	1.2394
contigs_merge_contig_10031	0.145589	0.145589	0.145589	#DIV/0!	#DIV/0!	0	#DIV/0!	0	0.203181	0.203181	0.203181	#DIV/0!	2.03181e-07	#DIV/0!	0.450756	0.652165	1	2.03181e-07	#DIV/0!	0.450756	0.652165	1	0	0	#DIV/0!	0	0	0	contigs_merge_contig_10031	0	874	0	#DIV/0!	0	0.145589	0.203181	-2.78003	2	2	0.145589	contigs_merge_contig_10031	0	874	0.203181	-2.78003	0.145589
contigs_merge_contig_10032	0	0	0	1	#NUM!	0	#NUM!	#NUM!	0	0	0	1	0	1	0	1	1	0	1	0	1	1	0	0	#DIV/0!	0	0	0	contigs_merge_contig_10032	0	734	0	#DIV/0!	0	0	0	#DIV/0!	0	0	0	contigs_merge_contig_10032	0	734	0	#DIV/0!	0
contigs_merge_contig_10033	1.27167	1.27167	1.27167	5.21525	2.38274	2.38274	2.38274	-0.378182	1.7832	1.7832	1.7832	5.32258	1.7832e-06	5.32258	1.10414	0.269531	1	1.7832e-06	5.32258	1.10414	0.269531	1	0.301682	0.412533	-1.7289	10	10	0.301682	contigs_merge_contig_10033	0	1941	0.412533	-1.7289	0.301682	1.57335	2.19574	0.653839	48	48	1.57335	contigs_merge_contig_10033	0	1941	2.19574	0.653839	1.57335
contigs_merge_contig_10034	0	0	0	1	#NUM!	0	#NUM!	#NUM!	0	0	0	1	0	1	0	1	1	0	1	0	1	1	0	0	#DIV/0!	0	0	0	contigs_merge_contig_10034	0	716	0	#DIV/0!	0	0	0	#DIV/0!	0	0	0	contigs_merge_contig_10034	0	716	0	#DIV/0!	0
contigs_merge_contig_10035	0.036548	0.036548	0.036548	1.62977	0.704665	0.704665	0.704665	0.828421	0.0526388	0.0526388	0.0526388	1.66331	5.26388e-08	1.66331	0.114498	0.908843	1	5.26388e-08	1.66331	0.114498	0.908843	1	0.0580342	0.0793583	-4.10695	0	2	0.0580342	contigs_merge_contig_10035	0	2018	0.0793583	-4.10695	0.0580342	0.0945822	0.131997	-3.40229	0	3	0.0945822	contigs_merge_contig_10035	0	2018	0.131997	-3.40229	0.0945822
contigs_merge_contig_10036	0.256648	0.256648	-0.256648	-2.30094	1.20223	1.20223	-1.20223	-0.4866	0.345399	0.345399	-0.345399	-2.25455	-3.45399e-07	-2.25455	-0.364888	0.715195	1	-3.45399e-07	-2.25455	-0.364888	0.715195	1	0.453927	0.620718	-1.13947	5	5	0.453927	contigs_merge_contig_10036	0	645	0.620718	-1.13947	0.453927	0.197278	0.275318	-2.34169	2	2	0.197278	contigs_merge_contig_10036	0	645	0.275318	-2.34169	0.197278
contigs_merge_contig_10037	0.501603	0.501603	-0.501603	-1.57779	0.657905	0.657905	-0.657905	2.22503	0.661482	0.661482	-0.661482	-1.54597	-6.61482e-07	-1.54597	-0.376633	0.706446	1	-6.61482e-07	-1.54597	-0.376633	0.706446	1	1.36974	1.87304	0.453906	12	12	1.36974	contigs_merge_contig_10037	0	513	1.87304	0.453906	1.36974	0.868141	1.21156	-0.203999	7	7	0.868141	contigs_merge_contig_10037	0	513	1.21156	-0.203999	0.868141
contigs_merge_contig_10038	2.15921	2.15921	2.15921	2.24201	1.16479	1.16479	1.16479	2.45995	3.06227	3.06227	3.06227	2.28815	3.06227e-06	2.28815	1.09529	0.273389	1	3.06227e-06	2.28815	1.09529	0.273389	1	1.73848	2.37727	0.797829	56	63	1.73848	contigs_merge_contig_10038	0	2122	2.37727	0.797829	1.73848	3.89769	5.43954	1.96262	104	130	3.89769	contigs_merge_contig_10038	0	2122	5.43954	1.96262	3.89769
contigs_merge_contig_10039	0.338406	0.338406	0.338406	6.51906	2.70467	2.70467	2.70467	0.328467	0.473998	0.473998	0.473998	6.65322	4.73998e-07	6.65322	0.591717	0.55404	1	4.73998e-07	6.65322	0.591717	0.55404	1	0.0613157	0.0838456	-4.0276	1	1	0.0613157	contigs_merge_contig_10039	0	955	0.0838456	-4.0276	0.0613157	0.399721	0.557844	-1.32293	6	6	0.399721	contigs_merge_contig_10039	0	955	0.557844	-1.32293	0.399721
contigs_merge_contig_1004	0.0230265	0.0230265	0.0230265	#DIV/0!	#DIV/0!	0	#DIV/0!	0	0.0321354	0.0321354	0.0321354	#DIV/0!	3.21354e-08	#DIV/0!	0.179263	0.857731	1	3.21354e-08	#DIV/0!	0.179263	0.857731	1	0	0	#DIV/0!	0	0	0	contigs_merge_contig_1004	0	2763	0	#DIV/0!	0	0.0230265	0.0321354	-5.44056	1	1	0.0230265	contigs_merge_contig_1004	0	2763	0.0321354	-5.44056	0.0230265
contigs_merge_contig_10040	0.511411	0.511411	-0.511411	#DIV/0!	#DIV/0!	0	#DIV/0!	0	0.699324	0.699324	-0.699324	#DIV/0!	-6.99324e-07	#DIV/0!	-0.836256	0.403011	1	-6.99324e-07	#DIV/0!	-0.836256	0.403011	1	0.511411	0.699324	-0.967446	4	4	0.511411	contigs_merge_contig_10040	0	458	0.699324	-0.967446	0.511411	0	0	#DIV/0!	0	0	0	contigs_merge_contig_10040	0	458	0	#DIV/0!	0
contigs_merge_contig_10041	1.53673	1.53673	1.53673	4.34604	2.1197	2.1197	2.1197	-0.888216	2.15755	2.15755	2.15755	4.43548	2.15755e-06	4.43548	1.16777	0.242901	1	2.15755e-06	4.43548	1.16777	0.242901	1	0.459267	0.62802	-1.1226	2	2	0.459267	contigs_merge_contig_10041	0	255	0.62802	-1.1226	0.459267	1.99599	2.78557	0.997107	8	8	1.99599	contigs_merge_contig_10041	0	255	2.78557	0.997107	1.99599
contigs_merge_contig_10042	0.0280649	0.0280649	0.0280649	1.15442	0.207165	0.207165	0.207165	0.915786	0.0442814	0.0442814	0.0442814	1.17817	4.42814e-08	1.17817	0.0601849	0.952008	1	4.42814e-08	1.17817	0.0601849	0.952008	1	0.181747	0.248528	-2.46	16	16	0.181747	contigs_merge_contig_10042	0	5155	0.248528	-2.46	0.181747	0.209812	0.292809	-2.25283	17	17	0.209812	contigs_merge_contig_10042	0	5155	0.292809	-2.25283	0.209812
contigs_merge_contig_10043	0.516837	0.516837	0.516837	3.25953	1.70467	1.70467	1.70467	0.199027	0.727726	0.727726	0.727726	3.32661	7.27726e-07	3.32661	0.625564	0.531601	1	7.27726e-07	3.32661	0.625564	0.531601	1	0.228736	0.312783	-2.12824	2	2	0.228736	contigs_merge_contig_10043	0	512	0.312783	-2.12824	0.228736	0.745574	1.04051	-0.423577	6	6	0.745574	contigs_merge_contig_10043	0	512	1.04051	-0.423577	0.745574
contigs_merge_contig_10044	0.250085	0.250085	0.250085	1.55216	0.634276	0.634276	0.634276	0.444913	0.36176	0.36176	0.36176	1.5841	3.6176e-07	1.5841	0.285956	0.774912	1	3.6176e-07	1.5841	0.285956	0.774912	1	0.452923	0.619346	-1.14266	7	7	0.452923	contigs_merge_contig_10044	0	905	0.619346	-1.14266	0.452923	0.703009	0.981106	-0.508385	10	10	0.703009	contigs_merge_contig_10044	0	905	0.981106	-0.508385	0.703009
contigs_merge_contig_10045	0.299516	0.299516	0.299516	6.51906	2.70467	2.70467	2.70467	0.356602	0.419526	0.419526	0.419526	6.65322	4.19526e-07	6.65322	0.556679	0.577747	1	4.19526e-07	6.65322	0.556679	0.577747	1	0.0542693	0.07421	-4.20372	0	1	0.0542693	contigs_merge_contig_10045	0	1079	0.07421	-4.20372	0.0542693	0.353785	0.493736	-1.49906	0	6	0.353785	contigs_merge_contig_10045	0	1079	0.493736	-1.49906	0.353785
contigs_merge_contig_10046	0.103032	0.103032	-0.103032	-1.38057	0.46526	0.46526	-0.46526	-0.753185	0.133271	0.133271	-0.133271	-1.35273	-1.33271e-07	-1.35273	-0.141352	0.887592	1	-1.33271e-07	-1.35273	-0.141352	0.887592	1	0.373765	0.511102	-1.4198	0	6	0.373765	contigs_merge_contig_10046	0	940	0.511102	-1.4198	0.373765	0.270733	0.37783	-1.88506	0	4	0.270733	contigs_merge_contig_10046	0	940	0.37783	-1.88506	0.270733
contigs_merge_contig_10047	0.159826	0.159826	0.159826	1.90139	0.927057	0.927057	0.927057	0.628532	0.22804	0.22804	0.22804	1.94052	2.2804e-07	1.94052	0.270071	0.787106	1	2.2804e-07	1.94052	0.270071	0.787106	1	0.17731	0.24246	-2.49566	2	4	0.17731	contigs_merge_contig_10047	0	1321	0.24246	-2.49566	0.17731	0.337136	0.4705	-1.5686	4	7	0.337136	contigs_merge_contig_10047	0	1321	0.4705	-1.5686	0.337136
contigs_merge_contig_10048	0.0704176	0.0704176	0.0704176	#DIV/0!	#DIV/0!	0	#DIV/0!	0	0.0982735	0.0982735	0.0982735	#DIV/0!	9.82735e-08	#DIV/0!	0.313486	0.753911	1	9.82735e-08	#DIV/0!	0.313486	0.753911	1	0	0	#DIV/0!	0	0	0	contigs_merge_contig_10048	0	1807	0	#DIV/0!	0	0.0704176	0.0982735	-3.82792	2	2	0.0704176	contigs_merge_contig_10048	0	1807	0.0982735	-3.82792	0.0704176
contigs_merge_contig_10049	0.0821463	0.0821463	0.0821463	#DIV/0!	#DIV/0!	0	#DIV/0!	0	0.114642	0.114642	0.114642	#DIV/0!	1.14642e-07	#DIV/0!	0.338588	0.73492	1	1.14642e-07	#DIV/0!	0.338588	0.73492	1	0	0	#DIV/0!	0	0	0	contigs_merge_contig_10049	0	1549	0	#DIV/0!	0	0.0821463	0.114642	-3.60566	2	2	0.0821463	contigs_merge_contig_10049	0	1549	0.114642	-3.60566	0.0821463
contigs_merge_contig_1005	0	0	0	1	#NUM!	0	#NUM!	#NUM!	0	0	0	1	0	1	0	1	1	0	1	0	1	1	0	0	#DIV/0!	0	0	0	contigs_merge_contig_1005	0	316	0	#DIV/0!	0	0	0	#DIV/0!	0	0	0	contigs_merge_contig_1005	0	316	0	#DIV/0!	0
contigs_merge_contig_10050	1.4711	1.4711	1.4711	1.9596	0.970559	0.970559	0.970559	2.57458	2.09618	2.09618	2.09618	1.99993	2.09618e-06	1.99993	0.83588	0.403222	1	2.09618e-06	1.99993	0.835881	0.403222	1	1.53304	2.09634	0.616392	48	56	1.53304	contigs_merge_contig_10050	0	2139	2.09634	0.616392	1.53304	3.00414	4.19252	1.58695	83	101	3.00414	contigs_merge_contig_10050	0	2139	4.19252	1.58695	3.00414
contigs_merge_contig_10051	0.927816	0.927816	0.927816	1.03954	0.0559501	0.0559501	0.0559501	1.01229	1.95512	1.95512	1.95512	1.06094	1.95512e-06	1.06094	0.240437	0.809992	1	1.95512e-06	1.06094	0.240437	0.809992	1	23.4632	32.0845	4.55233	331	347	23.4632	contigs_merge_contig_10051	0	866	32.0845	4.55233	23.4632	24.391	34.0396	4.60828	311	332	24.391	contigs_merge_contig_10051	0	866	34.0396	4.60828	24.391
contigs_merge_contig_10052	0	0	0	1	#NUM!	0	#NUM!	#NUM!	0	0	0	1	0	1	0	1	1	0	1	0	1	1	0	0	#DIV/0!	0	0	0	contigs_merge_contig_10052	0	325	0	#DIV/0!	0	0	0	#DIV/0!	0	0	0	contigs_merge_contig_10052	0	325	0	#DIV/0!	0
contigs_merge_contig_10053	3.04764	3.04764	-3.04764	-1.65723	0.728771	0.728771	-0.728771	-1.32928	4.03697	4.03697	-4.03697	-1.62381	-4.03697e-06	-1.62381	-0.979692	0.327238	1	-4.03697e-06	-1.62381	-0.979692	0.327238	1	7.68475	10.5084	2.942	0	605	7.68475	contigs_merge_contig_10053	0	4610	10.5084	2.942	7.68475	4.63711	6.47147	2.21323	0	336	4.63711	contigs_merge_contig_10053	0	4610	6.47147	2.21323	4.63711
contigs_merge_contig_10054	0.0658516	0.0658516	0.0658516	1.62977	0.704665	0.704665	0.704665	0.783681	0.0948439	0.0948439	0.0948439	1.66331	9.48439e-08	1.66331	0.153692	0.877853	1	9.48439e-08	1.66331	0.153692	0.877853	1	0.104565	0.142987	-3.25752	2	2	0.104565	contigs_merge_contig_10054	0	1120	0.142987	-3.25752	0.104565	0.170417	0.237831	-2.55286	3	3	0.170417	contigs_merge_contig_10054	0	1120	0.237831	-2.55286	0.170417
contigs_merge_contig_10055	0.0408592	0.0408592	0.0408592	1.2676	0.342095	0.342095	0.342095	0.873827	0.0613191	0.0613191	0.0613191	1.29368	6.13191e-08	1.29368	0.0886074	0.929394	1	6.13191e-08	1.29368	0.0886075	0.929394	1	0.15269	0.208794	-2.71132	2	6	0.15269	contigs_merge_contig_10055	0	2301	0.208794	-2.71132	0.15269	0.193549	0.270113	-2.36923	4	7	0.193549	contigs_merge_contig_10055	0	2301	0.270113	-2.36923	0.193549
contigs_merge_contig_10056	0.232829	0.232829	-0.232829	#DIV/0!	#DIV/0!	0	#DIV/0!	0	0.31838	0.31838	-0.31838	#DIV/0!	-3.1838e-07	#DIV/0!	-0.564252	0.572583	1	-3.1838e-07	#DIV/0!	-0.564252	0.572583	1	0.232829	0.31838	-2.10266	4	4	0.232829	contigs_merge_contig_10056	0	1006	0.31838	-2.10266	0.232829	0	0	#DIV/0!	0	0	0	contigs_merge_contig_10056	0	1006	0	#DIV/0!	0
contigs_merge_contig_10057	0.09072	0.09072	-0.09072	-1.84075	0.880297	0.880297	-0.880297	-0.725951	0.121018	0.121018	-0.121018	-1.80364	-1.21018e-07	-1.80364	-0.186249	0.85225	1	-1.21018e-07	-1.80364	-0.186249	0.85225	1	0.198623	0.271605	-2.3319	16	16	0.198623	contigs_merge_contig_10057	0	4717	0.271605	-2.3319	0.198623	0.107903	0.150587	-3.21219	8	8	0.107903	contigs_merge_contig_10057	0	4717	0.150587	-3.21219	0.107903
contigs_merge_contig_10058	0.414223	0.414223	-0.414223	-2.76113	1.46526	1.46526	-1.46526	-0.298255	0.559806	0.559806	-0.559806	-2.70546	-5.59806e-07	-2.70546	-0.507596	0.611736	1	-5.59806e-07	-2.70546	-0.507596	0.611737	1	0.649425	0.888051	-0.622764	6	6	0.649425	contigs_merge_contig_10058	0	541	0.888051	-0.622764	0.649425	0.235203	0.328244	-2.08802	2	2	0.235203	contigs_merge_contig_10058	0	541	0.328244	-2.08802	0.235203
contigs_merge_contig_10059	0.549679	0.549679	0.549679	1.39694	0.482273	0.482273	0.482273	2.02686	0.806091	0.806091	0.806091	1.42569	8.06091e-07	1.42569	0.376116	0.706831	1	8.06091e-07	1.42569	0.376116	0.706831	1	1.38478	1.89361	0.46966	7	7	1.38478	contigs_merge_contig_10059	0	296	1.89361	0.46966	1.38478	1.93446	2.6997	0.951932	9	9	1.93446	contigs_merge_contig_10059	0	296	2.6997	0.951932	1.93446
contigs_merge_contig_1006	0.540908	0.540908	0.540908	2.85209	1.51202	1.51202	1.51202	0.148494	0.7631	0.7631	0.7631	2.91078	7.631e-07	2.91078	0.610611	0.541457	1	7.631e-07	2.91078	0.610611	0.541457	1	0.292053	0.399364	-1.7757	8	8	0.292053	contigs_merge_contig_1006	0	1604	0.399364	-1.7757	0.292053	0.83296	1.16246	-0.26368	21	21	0.83296	contigs_merge_contig_1006	0	1604	1.16246	-0.26368	0.83296
contigs_merge_contig_10060	0.0109488	0.0109488	0.0109488	1.00429	0.00617358	0.00617358	0.00617358	1.00457	0.0871277	0.0871277	0.0871277	1.02496	8.71277e-08	1.02496	0.0327686	0.973859	1	8.71277e-08	1.02496	0.0327686	0.973859	1	2.55314	3.49126	1.35227	101	185	2.55314	contigs_merge_contig_10060	0	4243	3.49126	1.35227	2.55314	2.56409	3.57839	1.35844	89	171	2.56409	contigs_merge_contig_10060	0	4243	3.57839	1.35844	2.56409
contigs_merge_contig_10061	0	0	0	1	#NUM!	0	#NUM!	#NUM!	0	0	0	1	0	1	0	1	1	0	1	0	1	1	0	0	#DIV/0!	0	0	0	contigs_merge_contig_10061	0	280	0	#DIV/0!	0	0	0	#DIV/0!	0	0	0	contigs_merge_contig_10061	0	280	0	#DIV/0!	0
contigs_merge_contig_10062	0	0	0	1	#NUM!	0	#NUM!	#NUM!	0	0	0	1	0	1	0	1	1	0	1	0	1	1	0	0	#DIV/0!	0	0	0	contigs_merge_contig_10062	0	699	0	#DIV/0!	0	0	0	#DIV/0!	0	0	0	contigs_merge_contig_10062	0	699	0	#DIV/0!	0
contigs_merge_contig_10063	0.0883415	0.0883415	-0.0883415	-1.84075	0.880297	0.880297	-0.880297	-0.729183	0.117845	0.117845	-0.117845	-1.80364	-1.17845e-07	-1.80364	-0.183791	0.854177	1	-1.17845e-07	-1.80364	-0.183791	0.854177	1	0.193415	0.264484	-2.37023	2	4	0.193415	contigs_merge_contig_10063	0	1211	0.264484	-2.37023	0.193415	0.105074	0.146639	-3.25052	2	2	0.105074	contigs_merge_contig_10063	0	1211	0.146639	-3.25052	0.105074
contigs_merge_contig_10064	0	0	0	1	#NUM!	0	#NUM!	#NUM!	0	0	0	1	0	1	0	1	1	0	1	0	1	1	0	0	#DIV/0!	0	0	0	contigs_merge_contig_10064	0	551	0	#DIV/0!	0	0	0	#DIV/0!	0	0	0	contigs_merge_contig_10064	0	551	0	#DIV/0!	0
contigs_merge_contig_10065	0.167574	0.167574	0.167574	#DIV/0!	#DIV/0!	0	#DIV/0!	0	0.233863	0.233863	0.233863	#DIV/0!	2.33863e-07	#DIV/0!	0.483594	0.628674	1	2.33863e-07	#DIV/0!	0.483594	0.628674	1	0	0	#DIV/0!	0	0	0	contigs_merge_contig_10065	0	1139	0	#DIV/0!	0	0.167574	0.233863	-2.57713	3	3	0.167574	contigs_merge_contig_10065	0	1139	0.233863	-2.57713	0.167574
contigs_merge_contig_10066	0.00605772	0.00605772	0.00605772	1.08651	0.119703	0.119703	0.119703	0.968795	0.0104246	0.0104246	0.0104246	1.10887	1.04246e-08	1.10887	0.0231984	0.981492	1	1.04246e-08	1.10887	0.0231984	0.981492	1	0.0700228	0.095752	-3.83603	4	4	0.0700228	contigs_merge_contig_10066	0	3345	0.095752	-3.83603	0.0700228	0.0760805	0.106177	-3.71633	4	4	0.0760805	contigs_merge_contig_10066	0	3345	0.106177	-3.71633	0.0760805
contigs_merge_contig_10067	2.36567	2.36567	2.36567	2.53519	1.34209	1.34209	1.34209	3.15138	3.34485	3.34485	3.34485	2.58736	3.34485e-06	2.58736	1.21658	0.223765	1	3.34485e-06	2.58736	1.21658	0.223765	1	1.54096	2.10717	0.623831	9	9	1.54096	contigs_merge_contig_10067	0	342	2.10717	0.623831	1.54096	3.90663	5.45202	1.96593	21	21	3.90663	contigs_merge_contig_10067	0	342	5.45202	1.96593	3.90663
contigs_merge_contig_10068	14.1449	14.1449	14.1449	1.29643	0.374549	0.374549	0.374549	1.06717	21.0832	21.0832	21.0832	1.32311	2.10832e-05	1.32311	1.71248	0.0868074	1	2.10832e-05	1.32311	1.71249	0.0868074	1	47.7169	65.25	5.57643	852	854	47.7169	contigs_merge_contig_10068	0	1048	65.25	5.57643	47.7169	61.8618	86.3331	5.95098	1014	1019	61.8618	contigs_merge_contig_10068	0	1048	86.3331	5.95098	61.8618
contigs_merge_contig_10069	1.07484	1.07484	1.07484	1.83871	0.878694	0.878694	0.878694	3.45529	1.53609	1.53609	1.53609	1.87655	1.53609e-06	1.87655	0.684166	0.49387	1	1.53609e-06	1.87655	0.684166	0.49387	1	1.28154	1.75243	0.357879	13	13	1.28154	contigs_merge_contig_10069	0	594	1.75243	0.357879	1.28154	2.35638	3.28852	1.23657	22	22	2.35638	contigs_merge_contig_10069	0	594	3.28852	1.23657	2.35638
contigs_merge_contig_1007	6.48791	6.48791	6.48791	1.12795	0.173706	0.173706	0.173706	1.03067	10.4813	10.4813	10.4813	1.15116	1.04813e-05	1.15116	0.858248	0.390756	1	1.04813e-05	1.15116	0.858248	0.390756	1	50.7056	69.3369	5.66407	2648	2648	50.7056	contigs_merge_contig_1007	0	3058	69.3369	5.66407	50.7056	57.1935	79.8182	5.83778	2749	2749	57.1935	contigs_merge_contig_1007	0	3058	79.8182	5.83778	57.1935
contigs_merge_contig_10070	1.73728	1.73728	1.73728	2.28167	1.19009	1.19009	1.19009	3.71216	2.46265	2.46265	2.46265	2.32863	2.46265e-06	2.32863	0.991451	0.321465	1	2.46265e-06	2.32863	0.991452	0.321465	1	1.35548	1.85353	0.438799	20	20	1.35548	contigs_merge_contig_10070	0	864	1.85353	0.438799	1.35548	3.09275	4.31619	1.62889	42	42	3.09275	contigs_merge_contig_10070	0	864	4.31619	1.62889	3.09275
contigs_merge_contig_10071	0.121318	0.121318	-0.121318	-2.30094	1.20223	1.20223	-1.20223	-0.648749	0.163271	0.163271	-0.163271	-2.25455	-1.63271e-07	-2.25455	-0.250872	0.801913	1	-1.63271e-07	-2.25455	-0.250872	0.801913	1	0.214571	0.293414	-2.22047	10	10	0.214571	contigs_merge_contig_10071	0	2729	0.293414	-2.22047	0.214571	0.0932536	0.130143	-3.4227	4	4	0.0932536	contigs_merge_contig_10071	0	2729	0.130143	-3.4227	0.0932536
contigs_merge_contig_10072	0.198727	0.198727	-0.198727	-1.84075	0.880297	0.880297	-0.880297	-0.576962	0.265096	0.265096	-0.265096	-1.80364	-2.65096e-07	-1.80364	-0.275658	0.782811	1	-2.65096e-07	-1.80364	-0.275658	0.782811	1	0.435095	0.594966	-1.2006	12	12	0.435095	contigs_merge_contig_10072	0	1615	0.594966	-1.2006	0.435095	0.236368	0.32987	-2.0809	6	6	0.236368	contigs_merge_contig_10072	0	1615	0.32987	-2.0809	0.236368
contigs_merge_contig_10073	0	0	0	1	#NUM!	0	#NUM!	#NUM!	0	0	0	1	0	1	0	1	1	0	1	0	1	1	0	0	#DIV/0!	0	0	0	contigs_merge_contig_10073	0	532	0	#DIV/0!	0	0	0	#DIV/0!	0	0	0	contigs_merge_contig_10073	0	532	0	#DIV/0!	0
contigs_merge_contig_10074	1.92942	1.92942	1.92942	3.41475	1.77178	1.77178	1.77178	-4.47349	2.71515	2.71515	2.71515	3.48502	2.71515e-06	3.48502	1.22654	0.219997	1	2.71515e-06	3.48502	1.22654	0.219997	1	0.799017	1.09261	-0.323702	7	7	0.799017	contigs_merge_contig_10074	0	513	1.09261	-0.323702	0.799017	2.72844	3.80776	1.44808	22	22	2.72844	contigs_merge_contig_10074	0	513	3.80776	1.44808	2.72844
contigs_merge_contig_10075	0.217536	0.217536	0.217536	2.35411	1.23518	1.23518	1.23518	0.531777	0.30811	0.30811	0.30811	2.40255	3.0811e-07	2.40255	0.356377	0.721558	1	3.0811e-07	2.40255	0.356377	0.721558	1	0.160649	0.219678	-2.63802	6	6	0.160649	contigs_merge_contig_10075	0	2187	0.219678	-2.63802	0.160649	0.378185	0.527788	-1.40284	13	13	0.378185	contigs_merge_contig_10075	0	2187	0.527788	-1.40284	0.378185
contigs_merge_contig_10076	3.74668	3.74668	-3.74668	-24.8502	4.63518	4.63518	-4.63518	0.735818	5.11894	5.11894	-5.11894	-24.3491	-5.11894e-06	-24.3491	-2.17142	0.0298993	1	-5.11894e-06	-24.3491	-2.17142	0.0298993	1	3.90377	5.33817	1.96487	24	27	3.90377	contigs_merge_contig_10076	0	405	5.33817	1.96487	3.90377	0.157092	0.219235	-2.67032	1	1	0.157092	contigs_merge_contig_10076	0	405	0.219235	-2.67032	0.157092
contigs_merge_contig_10077	4.53135	4.53135	-4.53135	-3.08326	1.62446	1.62446	-1.62446	-2.44899	6.13515	6.13515	-6.13515	-3.02109	-6.13515e-06	-3.02109	-1.75604	0.0790813	1	-6.13515e-06	-3.02109	-1.75604	0.0790813	1	6.70647	9.1707	2.74555	67	67	6.70647	contigs_merge_contig_10077	0	585	9.1707	2.74555	6.70647	2.17512	3.03556	1.1211	20	20	2.17512	contigs_merge_contig_10077	0	585	3.03556	1.1211	2.17512
contigs_merge_contig_10078	0.36252	0.36252	0.36252	#DIV/0!	#DIV/0!	0	#DIV/0!	0	0.505927	0.505927	0.505927	#DIV/0!	5.05927e-07	#DIV/0!	0.711285	0.476908	1	5.05927e-07	#DIV/0!	0.711285	0.476908	1	0	0	#DIV/0!	0	0	0	contigs_merge_contig_10078	0	351	0	#DIV/0!	0	0.36252	0.505927	-1.46387	0	2	0.36252	contigs_merge_contig_10078	0	351	0.505927	-1.46387	0.36252
contigs_merge_contig_10079	0.194954	0.194954	0.194954	1.2021	0.265553	0.265553	0.265553	-4.11496	0.29922	0.29922	0.29922	1.22684	2.9922e-07	1.22684	0.174585	0.861406	1	2.9922e-07	1.22684	0.174585	0.861406	1	0.964654	1.31911	-0.051917	47	47	0.964654	contigs_merge_contig_10079	0	2853	1.31911	-0.051917	0.964654	1.15961	1.61833	0.213636	52	52	1.15961	contigs_merge_contig_10079	0	2853	1.61833	0.213636	1.15961
contigs_merge_contig_1008	5.05844	5.05844	5.05844	2.15062	1.10475	1.10475	1.10475	1.51714	7.18317	7.18317	7.18317	2.19488	7.18317e-06	2.19488	1.63906	0.101201	1	7.18317e-06	2.19488	1.63906	0.101201	1	4.39627	6.01164	2.13628	97	97	4.39627	contigs_merge_contig_1008	0	1292	6.01164	2.13628	4.39627	9.45471	13.1948	3.24103	192	192	9.45471	contigs_merge_contig_1008	0	1292	13.1948	3.24103	9.45471
contigs_merge_contig_10080	0.740264	0.740264	0.740264	5.43255	2.44163	2.44163	2.44163	0.0543745	1.0378	1.0378	1.0378	5.54435	1.0378e-06	5.54435	0.848905	0.395934	1	1.0378e-06	5.54435	0.848905	0.395934	1	0.167006	0.228371	-2.58203	8	8	0.167006	contigs_merge_contig_10080	0	2805	0.228371	-2.58203	0.167006	0.90727	1.26617	-0.140396	40	40	0.90727	contigs_merge_contig_10080	0	2805	1.26617	-0.140396	0.90727
contigs_merge_contig_10081	0.141244	0.141244	0.141244	1.69013	0.757132	0.757132	0.757132	0.669183	0.202877	0.202877	0.202877	1.72491	2.02877e-07	1.72491	0.232318	0.816291	1	2.02877e-07	1.72491	0.232318	0.816291	1	0.204664	0.279865	-2.28867	9	9	0.204664	contigs_merge_contig_10081	0	2575	0.279865	-2.28867	0.204664	0.345908	0.482742	-1.53154	14	14	0.345908	contigs_merge_contig_10081	0	2575	0.482742	-1.53154	0.345908
contigs_merge_contig_10082	6.02269	6.02269	6.02269	2.86444	1.51825	1.51825	1.51825	1.89749	8.49606	8.49606	8.49606	2.92339	8.49606e-06	2.92339	2.04086	0.0412647	1	8.49606e-06	2.92339	2.04086	0.0412646	1	3.2303	4.41724	1.69167	89	165	3.2303	contigs_merge_contig_10082	0	2991	4.41724	1.69167	3.2303	9.25299	12.9133	3.20992	163	435	9.25299	contigs_merge_contig_10082	0	2991	12.9133	3.20992	9.25299
contigs_merge_contig_10083	0.0377436	0.0377436	-0.0377436	-1.38057	0.46526	0.46526	-0.46526	-0.860443	0.0488211	0.0488211	-0.0488211	-1.35273	-4.88211e-08	-1.35273	-0.0855535	0.931821	1	-4.88211e-08	-1.35273	-0.0855535	0.931821	1	0.136921	0.187231	-2.86858	3	3	0.136921	contigs_merge_contig_10083	0	1283	0.187231	-2.86858	0.136921	0.0991774	0.13841	-3.33384	2	2	0.0991774	contigs_merge_contig_10083	0	1283	0.13841	-3.33384	0.0991774
contigs_merge_contig_10084	0.230962	0.230962	0.230962	1.62977	0.704665	0.704665	0.704665	0.513071	0.332647	0.332647	0.332647	1.66331	3.32647e-07	1.66331	0.287831	0.773476	1	3.32647e-07	1.66331	0.287831	0.773476	1	0.366742	0.501498	-1.44716	18	18	0.366742	contigs_merge_contig_10084	0	2874	0.501498	-1.44716	0.366742	0.597704	0.834145	-0.742496	27	27	0.597704	contigs_merge_contig_10084	0	2874	0.834145	-0.742496	0.597704
contigs_merge_contig_10085	0	0	0	1	#NUM!	0	#NUM!	#NUM!	0	0	0	1	0	1	0	1	1	0	1	0	1	1	0	0	#DIV/0!	0	0	0	contigs_merge_contig_10085	0	926	0	#DIV/0!	0	0	0	#DIV/0!	0	0	0	contigs_merge_contig_10085	0	926	0	#DIV/0!	0
contigs_merge_contig_10086	2.06282	2.06282	2.06282	2.39032	1.25721	1.25721	1.25721	3.20874	2.92058	2.92058	2.92058	2.43951	2.92058e-06	2.43951	1.10559	0.268903	1	2.92058e-06	2.43951	1.10559	0.268903	1	1.4837	2.02887	0.569195	45	45	1.4837	contigs_merge_contig_10086	0	1776	2.02887	0.569195	1.4837	3.54651	4.94945	1.8264	99	99	3.54651	contigs_merge_contig_10086	0	1776	4.94945	1.8264	3.54651
contigs_merge_contig_10087	0.0626287	0.0626287	0.0626287	2.17302	1.1197	1.1197	1.1197	0.735123	0.088906	0.088906	0.088906	2.21774	8.8906e-08	2.21774	0.183429	0.854462	1	8.8906e-08	2.21774	0.183429	0.854462	1	0.053391	0.073009	-4.22726	4	4	0.053391	contigs_merge_contig_10087	0	4387	0.073009	-4.22726	0.053391	0.11602	0.161915	-3.10756	8	8	0.11602	contigs_merge_contig_10087	0	4387	0.161915	-3.10756	0.11602
contigs_merge_contig_10088	0.626737	0.626737	0.626737	1.20088	0.264092	0.264092	0.264092	1.16088	0.96246	0.96246	0.96246	1.22559	9.6246e-07	1.22559	0.312344	0.754779	1	9.6246e-07	1.22559	0.312344	0.754779	1	3.11995	4.26635	1.64152	50	95	3.11995	contigs_merge_contig_10088	0	1783	4.26635	1.64152	3.11995	3.74669	5.22881	1.90562	55	105	3.74669	contigs_merge_contig_10088	0	1783	5.22881	1.90562	3.74669
contigs_merge_contig_10089	0.449201	0.449201	0.449201	1.53922	0.622203	0.622203	0.622203	-1.36109	0.650339	0.650339	0.650339	1.5709	6.50339e-07	1.5709	0.380021	0.70393	1	6.50339e-07	1.5709	0.380021	0.70393	1	0.833051	1.13915	-0.263524	47	48	0.833051	contigs_merge_contig_10089	0	3374	1.13915	-0.263524	0.833051	1.28225	1.78949	0.358679	66	68	1.28225	contigs_merge_contig_10089	0	3374	1.78949	0.358679	1.28225
contigs_merge_contig_1009	0	0	0	1	#NUM!	0	#NUM!	#NUM!	0	0	0	1	0	1	0	1	1	0	1	0	1	1	0	0	#DIV/0!	0	0	0	contigs_merge_contig_1009	0	744	0	#DIV/0!	0	0	0	#DIV/0!	0	0	0	contigs_merge_contig_1009	0	744	0	#DIV/0!	0
contigs_merge_contig_10090	0	0	0	1	#NUM!	0	#NUM!	#NUM!	0	0	0	1	0	1	0	1	1	0	1	0	1	1	0	0	#DIV/0!	0	0	0	contigs_merge_contig_10090	0	2749	0	#DIV/0!	0	0	0	#DIV/0!	0	0	0	contigs_merge_contig_10090	0	2749	0	#DIV/0!	0
contigs_merge_contig_10091	0.228928	0.228928	0.228928	2.71628	1.44163	1.44163	1.44163	0.503967	0.323241	0.323241	0.323241	2.77218	3.23241e-07	2.77218	0.389691	0.696765	1	3.23241e-07	2.77218	0.389691	0.696765	1	0.133386	0.182398	-2.90632	4	4	0.133386	contigs_merge_contig_10091	0	1756	0.182398	-2.90632	0.133386	0.362314	0.505638	-1.46469	10	10	0.362314	contigs_merge_contig_10091	0	1756	0.505638	-1.46469	0.362314
contigs_merge_contig_10092	0.470353	0.470353	0.470353	1.71334	0.776815	0.776815	0.776815	-0.29285	0.674971	0.674971	0.674971	1.7486	6.74971e-07	1.7486	0.428758	0.668099	1	6.74971e-07	1.7486	0.428758	0.668099	1	0.659363	0.90164	-0.600855	26	26	0.659363	contigs_merge_contig_10092	0	2309	0.90164	-0.600855	0.659363	1.12972	1.57661	0.17596	41	41	1.12972	contigs_merge_contig_10092	0	2309	1.57661	0.17596	1.12972
contigs_merge_contig_10093	0.490013	0.490013	-0.490013	#DIV/0!	#DIV/0!	0	#DIV/0!	0	0.670063	0.670063	-0.670063	#DIV/0!	-6.70063e-07	#DIV/0!	-0.818574	0.413029	1	-6.70063e-07	#DIV/0!	-0.818574	0.41303	1	0.490013	0.670063	-1.02911	2	2	0.490013	contigs_merge_contig_10093	0	239	0.670063	-1.02911	0.490013	0	0	#DIV/0!	0	0	0	contigs_merge_contig_10093	0	239	0	#DIV/0!	0
contigs_merge_contig_10094	108.083	108.083	108.083	1.02445	0.0348545	0.0348545	0.0348545	1.00288	275.219	275.219	275.219	1.04554	0.000275219	1.04554	2.4829	0.0130317	0.980221	0.000275219	1.04554	2.48291	0.0130316	0.980217	4419.92	6043.98	12.1098	17580	18191	4419.92	contigs_merge_contig_10094	0	241	6043.98	12.1098	4419.92	4528.01	6319.2	12.1447	16613	17152	4528.01	contigs_merge_contig_10094	0	241	6319.2	12.1447	4528.01
contigs_merge_contig_10095	0.102015	0.102015	-0.102015	#DIV/0!	#DIV/0!	0	#DIV/0!	0	0.139499	0.139499	-0.139499	#DIV/0!	-1.39499e-07	#DIV/0!	-0.373496	0.708779	1	-1.39499e-07	#DIV/0!	-0.373496	0.708779	1	0.102015	0.139499	-3.29315	1	1	0.102015	contigs_merge_contig_10095	0	574	0.139499	-3.29315	0.102015	0	0	#DIV/0!	0	0	0	contigs_merge_contig_10095	0	574	0	#DIV/0!	0
contigs_merge_contig_10096	0.352432	0.352432	0.352432	1.58798	0.66719	0.66719	0.66719	0.0964561	0.508715	0.508715	0.508715	1.62066	5.08715e-07	1.62066	0.347103	0.728514	1	5.08715e-07	1.62066	0.347103	0.728514	1	0.599398	0.81964	-0.738415	12	13	0.599398	contigs_merge_contig_10096	0	1270	0.81964	-0.738415	0.599398	0.95183	1.32836	-0.0712246	19	19	0.95183	contigs_merge_contig_10096	0	1270	1.32836	-0.0712246	0.95183
contigs_merge_contig_10097	0	0	0	1	#NUM!	0	#NUM!	#NUM!	0	0	0	1	0	1	0	1	1	0	1	0	1	1	0	0	#DIV/0!	0	0	0	contigs_merge_contig_10097	0	671	0	#DIV/0!	0	0	0	#DIV/0!	0	0	0	contigs_merge_contig_10097	0	671	0	#DIV/0!	0
contigs_merge_contig_10098	2.54868	2.54868	-2.54868	-1.38057	0.46526	0.46526	-0.46526	-1.16958	3.29671	3.29671	-3.29671	-1.35273	-3.29671e-06	-1.35273	-0.703035	0.482034	1	-3.29671e-06	-1.35273	-0.703035	0.482034	1	9.24577	12.643	3.20879	37	39	9.24577	contigs_merge_contig_10098	0	247	12.643	3.20879	9.24577	6.69708	9.34633	2.74353	21	26	6.69708	contigs_merge_contig_10098	0	247	9.34633	2.74353	6.69708
contigs_merge_contig_10099	0	0	0	1	#NUM!	0	#NUM!	#NUM!	0	0	0	1	0	1	0	1	1	0	1	0	1	1	0	0	#DIV/0!	0	0	0	contigs_merge_contig_10099	0	236	0	#DIV/0!	0	0	0	#DIV/0!	0	0	0	contigs_merge_contig_10099	0	236	0	#DIV/0!	0
contigs_merge_contig_101	0.0557892	0.0557892	-0.0557892	-1.38057	0.46526	0.46526	-0.46526	-0.832042	0.072163	0.072163	-0.072163	-1.35273	-7.2163e-08	-1.35273	-0.104014	0.917158	1	-7.2163e-08	-1.35273	-0.104014	0.917158	1	0.202384	0.276749	-2.30483	3	3	0.202384	contigs_merge_contig_101	0	868	0.276749	-2.30483	0.202384	0.146595	0.204585	-2.77009	2	2	0.146595	contigs_merge_contig_101	0	868	0.204585	-2.77009	0.146595
contigs_merge_contig_1010	0.192933	0.192933	-0.192933	-1.84075	0.880297	0.880297	-0.880297	-0.585466	0.257367	0.257367	-0.257367	-1.80364	-2.57367e-07	-1.80364	-0.27161	0.785922	1	-2.57367e-07	-1.80364	-0.27161	0.785922	1	0.42241	0.57762	-1.24329	8	8	0.42241	contigs_merge_contig_1010	0	1109	0.57762	-1.24329	0.42241	0.229476	0.320253	-2.12358	4	4	0.229476	contigs_merge_contig_1010	0	1109	0.320253	-2.12358	0.229476
contigs_merge_contig_10100	0.342055	0.342055	0.342055	#DIV/0!	#DIV/0!	0	#DIV/0!	0	0.477366	0.477366	0.477366	#DIV/0!	4.77366e-07	#DIV/0!	0.690917	0.489618	1	4.77366e-07	#DIV/0!	0.690917	0.489618	1	0	0	#DIV/0!	0	0	0	contigs_merge_contig_10100	0	372	0	#DIV/0!	0	0.342055	0.477366	-1.5477	2	2	0.342055	contigs_merge_contig_10100	0	372	0.477366	-1.5477	0.342055
contigs_merge_contig_10101	0.062427	0.062427	-0.062427	#DIV/0!	#DIV/0!	0	#DIV/0!	0	0.0853652	0.0853652	-0.0853652	#DIV/0!	-8.53652e-08	#DIV/0!	-0.292173	0.770154	1	-8.53652e-08	#DIV/0!	-0.292173	0.770154	1	0.062427	0.0853652	-4.00169	1	1	0.062427	contigs_merge_contig_10101	0	938	0.0853652	-4.00169	0.062427	0	0	#DIV/0!	0	0	0	contigs_merge_contig_10101	0	938	0	#DIV/0!	0
contigs_merge_contig_10102	0	0	0	1	#NUM!	0	#NUM!	#NUM!	0	0	0	1	0	1	0	1	1	0	1	0	1	1	0	0	#DIV/0!	0	0	0	contigs_merge_contig_10102	0	310	0	#DIV/0!	0	0	0	#DIV/0!	0	0	0	contigs_merge_contig_10102	0	310	0	#DIV/0!	0
contigs_merge_contig_10103	0.0682106	0.0682106	0.0682106	2.17302	1.1197	1.1197	1.1197	0.727174	0.0968298	0.0968298	0.0968298	2.21774	9.68298e-08	2.21774	0.191428	0.84819	1	9.68298e-08	2.21774	0.191428	0.84819	1	0.0581495	0.079516	-4.10409	1	1	0.0581495	contigs_merge_contig_10103	0	1007	0.079516	-4.10409	0.0581495	0.12636	0.176346	-2.98439	2	2	0.12636	contigs_merge_contig_10103	0	1007	0.176346	-2.98439	0.12636
contigs_merge_contig_10104	2.43022	2.43022	2.43022	1.55635	0.63817	0.63817	0.63817	1.30003	3.5145	3.5145	3.5145	1.58838	3.5145e-06	1.58838	0.893817	0.37142	1	3.5145e-06	1.58838	0.893818	0.37142	1	4.36813	5.97316	2.12702	37	37	4.36813	contigs_merge_contig_10104	0	496	5.97316	2.12702	4.36813	6.79835	9.48765	2.76518	53	53	6.79835	contigs_merge_contig_10104	0	496	9.48765	2.76518	6.79835
contigs_merge_contig_10105	0.486105	0.486105	-0.486105	-2.76113	1.46526	1.46526	-1.46526	-0.211022	0.656953	0.656953	-0.656953	-2.70546	-6.56953e-07	-2.70546	-0.549878	0.582403	1	-6.56953e-07	-2.70546	-0.549878	0.582403	1	0.762124	1.04216	-0.391902	6	6	0.762124	contigs_merge_contig_10105	0	461	1.04216	-0.391902	0.762124	0.276019	0.385207	-1.85716	2	2	0.276019	contigs_merge_contig_10105	0	461	0.385207	-1.85716	0.276019
contigs_merge_contig_10106	0.438437	0.438437	0.438437	5.43255	2.44163	2.44163	2.44163	0.268468	0.614659	0.614659	0.614659	5.54435	6.14659e-07	5.54435	0.653311	0.513556	1	6.14659e-07	5.54435	0.653311	0.513556	1	0.0989131	0.135258	-3.3377	4	4	0.0989131	contigs_merge_contig_10106	0	2368	0.135258	-3.3377	0.0989131	0.537351	0.749916	-0.896065	20	20	0.537351	contigs_merge_contig_10106	0	2368	0.749916	-0.896065	0.537351
contigs_merge_contig_10107	0.109698	0.109698	-0.109698	#DIV/0!	#DIV/0!	0	#DIV/0!	0	0.150005	0.150005	-0.150005	#DIV/0!	-1.50005e-07	#DIV/0!	-0.387305	0.698531	1	-1.50005e-07	#DIV/0!	-0.387305	0.698531	1	0.109698	0.150005	-3.1884	0	5	0.109698	contigs_merge_contig_10107	0	2669	0.150005	-3.1884	0.109698	0	0	#DIV/0!	0	0	0	contigs_merge_contig_10107	0	2669	0	#DIV/0!	0
contigs_merge_contig_10108	0	0	0	1	#NUM!	0	#NUM!	#NUM!	0	0	0	1	0	1	0	1	1	0	1	0	1	1	0	0	#DIV/0!	0	0	0	contigs_merge_contig_10108	0	355	0	#DIV/0!	0	0	0	#DIV/0!	0	0	0	contigs_merge_contig_10108	0	355	0	#DIV/0!	0
contigs_merge_contig_10109	0.160179	0.160179	0.160179	5.97581	2.57913	2.57913	2.57913	0.479717	0.224449	0.224449	0.224449	6.09879	2.24449e-07	6.09879	0.401514	0.688042	1	2.24449e-07	6.09879	0.401514	0.688042	1	0.0321916	0.0440201	-4.95717	2	2	0.0321916	contigs_merge_contig_10109	0	3638	0.0440201	-4.95717	0.0321916	0.192371	0.268469	-2.37804	5	11	0.192371	contigs_merge_contig_10109	0	3638	0.268469	-2.37804	0.192371
contigs_merge_contig_1011	5.47554	5.47554	5.47554	1.22455	0.292248	0.292248	0.292248	1.06342	8.32778	8.32778	8.32778	1.24975	8.32778e-06	1.24975	0.961515	0.336293	1	8.32778e-06	1.24975	0.961516	0.336293	1	24.3849	33.3448	4.60791	1038	1039	24.3849	contigs_merge_contig_1011	0	2495	33.3448	4.60791	24.3849	29.8604	41.6726	4.90016	1166	1171	29.8604	contigs_merge_contig_1011	0	2495	41.6726	4.90016	29.8604
contigs_merge_contig_10110	0.548735	0.548735	0.548735	1.18901	0.249763	0.249763	0.249763	1.16243	0.847502	0.847502	0.847502	1.21348	8.47502e-07	1.21348	0.285899	0.774955	1	8.47502e-07	1.21348	0.285899	0.774955	1	2.90318	3.96992	1.53763	53	53	2.90318	contigs_merge_contig_10110	0	1069	3.96992	1.53763	2.90318	3.45191	4.81742	1.7874	58	58	3.45191	contigs_merge_contig_10110	0	1069	4.81742	1.7874	3.45191
contigs_merge_contig_10111	0.035726	0.035726	0.035726	1.20723	0.271706	0.271706	0.271706	0.89287	0.0547098	0.0547098	0.0547098	1.23208	5.47098e-08	1.23208	0.0754215	0.939879	1	5.47098e-08	1.23208	0.0754215	0.939879	1	0.172394	0.235739	-2.53622	8	9	0.172394	contigs_merge_contig_10111	0	3057	0.235739	-2.53622	0.172394	0.20812	0.290448	-2.26451	10	10	0.20812	contigs_merge_contig_10111	0	3057	0.290448	-2.26451	0.20812
contigs_merge_contig_10112	0.0160925	0.0160925	-0.0160925	-1.07377	0.10269	0.10269	-0.10269	-0.953253	0.0158671	0.0158671	-0.0158671	-1.05212	-1.58671e-08	-1.05212	-0.020075	0.983984	1	-1.58671e-08	-1.05212	-0.020075	0.983984	1	0.234226	0.32029	-2.09403	7	7	0.234226	contigs_merge_contig_10112	0	1750	0.32029	-2.09403	0.234226	0.218134	0.304423	-2.19672	6	6	0.218134	contigs_merge_contig_10112	0	1750	0.304423	-2.19672	0.218134
contigs_merge_contig_10113	0.204129	0.204129	0.204129	2.9879	1.57913	1.57913	1.57913	0.519098	0.287769	0.287769	0.287769	3.04939	2.87769e-07	3.04939	0.381628	0.702738	1	2.87769e-07	3.04939	0.381628	0.702738	1	0.102686	0.140417	-3.28369	8	8	0.102686	contigs_merge_contig_10113	0	4562	0.140417	-3.28369	0.102686	0.306815	0.428186	-1.70456	22	22	0.306815	contigs_merge_contig_10113	0	4562	0.428186	-1.70456	0.306815
contigs_merge_contig_10114	0.0982584	0.0982584	0.0982584	#DIV/0!	#DIV/0!	0	#DIV/0!	0	0.137128	0.137128	0.137128	#DIV/0!	1.37128e-07	#DIV/0!	0.370307	0.711153	1	1.37128e-07	#DIV/0!	0.370307	0.711154	1	0	0	#DIV/0!	0	0	0	contigs_merge_contig_10114	0	1295	0	#DIV/0!	0	0.0982584	0.137128	-3.34728	2	2	0.0982584	contigs_merge_contig_10114	0	1295	0.137128	-3.34728	0.0982584
contigs_merge_contig_10115	0.0326268	0.0326268	0.0326268	#DIV/0!	#DIV/0!	0	#DIV/0!	0	0.0455334	0.0455334	0.0455334	#DIV/0!	4.55334e-08	#DIV/0!	0.213386	0.831026	1	4.55334e-08	#DIV/0!	0.213386	0.831026	1	0	0	#DIV/0!	0	0	0	contigs_merge_contig_10115	0	1950	0	#DIV/0!	0	0.0326268	0.0455334	-4.9378	1	1	0.0326268	contigs_merge_contig_10115	0	1950	0.0455334	-4.9378	0.0326268
contigs_merge_contig_10116	1.00607	1.00607	-1.00607	-10.1242	3.33973	3.33973	-3.33973	0.0499101	1.37263	1.37263	-1.37263	-9.92	-1.37263e-06	-9.92	-1.05888	0.289653	1	-1.37263e-06	-9.92	-1.05888	0.289653	1	1.11633	1.52651	0.158762	11	11	1.11633	contigs_merge_contig_10116	0	577	1.52651	0.158762	1.11633	0.110264	0.153882	-3.18097	1	1	0.110264	contigs_merge_contig_10116	0	577	0.153882	-3.18097	0.110264
contigs_merge_contig_10117	0.0925883	0.0925883	-0.0925883	-1.21621	0.282396	0.282396	-0.282396	-0.7692	0.114558	0.114558	-0.114558	-1.19169	-1.14558e-07	-1.19169	-0.100097	0.920267	1	-1.14558e-07	-1.19169	-0.100097	0.920267	1	0.520815	0.712184	-0.941156	31	37	0.520815	contigs_merge_contig_10117	0	4160	0.712184	-0.941156	0.520815	0.428227	0.597626	-1.22355	25	28	0.428227	contigs_merge_contig_10117	0	4160	0.597626	-1.22355	0.428227
contigs_merge_contig_10118	2.77779	2.77779	2.77779	1.37267	0.456985	0.456985	0.456985	1.15769	4.0864	4.0864	4.0864	1.40092	4.0864e-06	1.40092	0.826061	0.408769	1	4.0864e-06	1.40092	0.826061	0.408769	1	7.45376	10.1926	2.89797	243	243	7.45376	contigs_merge_contig_10118	0	1909	10.1926	2.89797	7.45376	10.2316	14.279	3.35495	307	307	10.2316	contigs_merge_contig_10118	0	1909	14.279	3.35495	10.2316
contigs_merge_contig_10119	0.294724	0.294724	0.294724	1.2676	0.342095	0.342095	0.342095	3.45567	0.442305	0.442305	0.442305	1.29368	4.42305e-07	1.29368	0.237976	0.8119	1	4.42305e-07	1.29368	0.237976	0.8119	1	1.10138	1.50607	0.139308	6	6	1.10138	contigs_merge_contig_10119	0	319	1.50607	0.139308	1.10138	1.3961	1.94837	0.481403	7	7	1.3961	contigs_merge_contig_10119	0	319	1.94837	0.481403	1.3961
contigs_merge_contig_1012	3.28717	3.28717	3.28717	3.2893	1.71778	1.71778	1.71778	4.29115	4.62792	4.62792	4.62792	3.35699	4.62792e-06	3.35699	1.58227	0.113589	1	4.62792e-06	3.35699	1.58227	0.113589	1	1.43588	1.96349	0.521939	13	73	1.43588	contigs_merge_contig_1012	0	2977	1.96349	0.521939	1.43588	4.72305	6.59141	2.23972	11	221	4.72305	contigs_merge_contig_1012	0	2977	6.59141	2.23972	4.72305
contigs_merge_contig_10120	1.00044	1.00044	1.00044	2.03998	1.02855	1.02855	1.02855	-17.3936	1.42327	1.42327	1.42327	2.08196	1.42327e-06	2.08196	0.706864	0.479651	1	1.42327e-06	2.08196	0.706864	0.479651	1	0.961981	1.31545	-0.0559191	147	147	0.961981	contigs_merge_contig_10120	0	8948	1.31545	-0.0559191	0.961981	1.96242	2.73872	0.972636	273	276	1.96242	contigs_merge_contig_10120	0	8948	2.73872	0.972636	1.96242
contigs_merge_contig_10121	0.312165	0.312165	0.312165	2.39032	1.25721	1.25721	1.25721	0.416621	0.44197	0.44197	0.44197	2.43951	4.4197e-07	2.43951	0.430086	0.667133	1	4.4197e-07	2.43951	0.430087	0.667133	1	0.224527	0.307027	-2.15504	10	10	0.224527	contigs_merge_contig_10121	0	2608	0.307027	-2.15504	0.224527	0.536691	0.748996	-0.897836	22	22	0.536691	contigs_merge_contig_10121	0	2608	0.748996	-0.897836	0.536691
contigs_merge_contig_10122	0.820026	0.820026	0.820026	1.55216	0.634276	0.634276	0.634276	2.11162	1.18621	1.18621	1.18621	1.5841	1.18621e-06	1.5841	0.517809	0.604591	1	1.18621e-06	1.5841	0.517809	0.604591	1	1.48513	2.03083	0.570589	7	7	1.48513	contigs_merge_contig_10122	0	276	2.03083	0.570589	1.48513	2.30516	3.21703	1.20486	10	10	2.30516	contigs_merge_contig_10122	0	276	3.21703	1.20486	2.30516
contigs_merge_contig_10123	0	0	0	1	#NUM!	0	#NUM!	#NUM!	0	0	0	1	0	1	0	1	1	0	1	0	1	1	0	0	#DIV/0!	0	0	0	contigs_merge_contig_10123	0	284	0	#DIV/0!	0	0	0	#DIV/0!	0	0	0	contigs_merge_contig_10123	0	284	0	#DIV/0!	0
contigs_merge_contig_10124	0.694437	0.694437	0.694437	2.32824	1.21924	1.21924	1.21924	-0.303166	0.983857	0.983857	0.983857	2.37615	9.83857e-07	2.37615	0.633269	0.526558	1	9.83857e-07	2.37615	0.633269	0.526558	1	0.522826	0.714934	-0.935597	7	7	0.522826	contigs_merge_contig_10124	0	784	0.714934	-0.935597	0.522826	1.21726	1.69879	0.283641	15	15	1.21726	contigs_merge_contig_10124	0	784	1.69879	0.283641	1.21726
contigs_merge_contig_10125	0	0	0	1	#NUM!	0	#NUM!	#NUM!	0	0	0	1	0	1	0	1	1	0	1	0	1	1	0	0	#DIV/0!	0	0	0	contigs_merge_contig_10125	0	1007	0	#DIV/0!	0	0	0	#DIV/0!	0	0	0	contigs_merge_contig_10125	0	1007	0	#DIV/0!	0
contigs_merge_contig_10126	0.242833	0.242833	0.242833	#DIV/0!	#DIV/0!	0	#DIV/0!	0	0.338894	0.338894	0.338894	#DIV/0!	3.38894e-07	#DIV/0!	0.582146	0.560469	1	3.38894e-07	#DIV/0!	0.582146	0.560469	1	0	0	#DIV/0!	0	0	0	contigs_merge_contig_10126	0	262	0	#DIV/0!	0	0.242833	0.338894	-2.04196	1	1	0.242833	contigs_merge_contig_10126	0	262	0.338894	-2.04196	0.242833
contigs_merge_contig_10127	0.0796585	0.0796585	0.0796585	1.41246	0.498214	0.498214	0.498214	0.789993	0.116605	0.116605	0.116605	1.44153	1.16605e-07	1.44153	0.145214	0.884542	1	1.16605e-07	1.44153	0.145214	0.884542	1	0.193128	0.264092	-2.37237	20	20	0.193128	contigs_merge_contig_10127	0	6064	0.264092	-2.37237	0.193128	0.272787	0.380696	-1.87415	26	26	0.272787	contigs_merge_contig_10127	0	6064	0.380696	-1.87415	0.272787
contigs_merge_contig_10128	0.277519	0.277519	-0.277519	#DIV/0!	#DIV/0!	0	#DIV/0!	0	0.379491	0.379491	-0.379491	#DIV/0!	-3.79491e-07	#DIV/0!	-0.616028	0.537876	1	-3.79491e-07	#DIV/0!	-0.616028	0.537876	1	0.277519	0.379491	-1.84934	2	2	0.277519	contigs_merge_contig_10128	0	422	0.379491	-1.84934	0.277519	0	0	#DIV/0!	0	0	0	contigs_merge_contig_10128	0	422	0	#DIV/0!	0
contigs_merge_contig_10129	0	0	0	1	#NUM!	0	#NUM!	#NUM!	0	0	0	1	0	1	0	1	1	0	1	0	1	1	0	0	#DIV/0!	0	0	0	contigs_merge_contig_10129	0	2135	0	#DIV/0!	0	0	0	#DIV/0!	0	0	0	contigs_merge_contig_10129	0	2135	0	#DIV/0!	0
contigs_merge_contig_1013	1.6493	1.6493	-1.6493	-1.71525	0.778418	0.778418	-0.778418	-1.64581	2.19043	2.19043	-2.19043	-1.68066	-2.19043e-06	-1.68066	-0.74578	0.4558	1	-2.19043e-06	-1.68066	-0.74578	0.4558	1	3.95522	5.40853	1.98376	177	205	3.95522	contigs_merge_contig_1013	0	3035	5.40853	1.98376	3.95522	2.30592	3.21809	1.20534	93	110	2.30592	contigs_merge_contig_1013	0	3035	3.21809	1.20534	2.30592
contigs_merge_contig_10130	0.0793732	0.0793732	0.0793732	1.08651	0.119703	0.119703	0.119703	0.0364351	0.136591	0.136591	0.136591	1.10887	1.36591e-07	1.10887	0.0839733	0.933078	1	1.36591e-07	1.10887	0.0839733	0.933078	1	0.917494	1.25462	-0.124229	45	45	0.917494	contigs_merge_contig_10130	0	2872	1.25462	-0.124229	0.917494	0.996868	1.39121	-0.00452628	45	45	0.996868	contigs_merge_contig_10130	0	2872	1.39121	-0.00452628	0.996868
contigs_merge_contig_10131	0.0665238	0.0665238	0.0665238	1.25807	0.331207	0.331207	0.331207	0.830654	0.100093	0.100093	0.100093	1.28396	1.00093e-07	1.28396	0.111554	0.911177	1	1.00093e-07	1.28396	0.111554	0.911177	1	0.257779	0.352497	-1.95579	19	19	0.257779	contigs_merge_contig_10131	0	4316	0.352497	-1.95579	0.257779	0.324303	0.452591	-1.62459	22	22	0.324303	contigs_merge_contig_10131	0	4316	0.452591	-1.62459	0.324303
contigs_merge_contig_10132	0.159536	0.159536	0.159536	1.76558	0.820142	0.820142	0.820142	0.637533	0.22851	0.22851	0.22851	1.80191	2.2851e-07	1.80191	0.255735	0.798156	1	2.2851e-07	1.80191	0.255735	0.798156	1	0.208386	0.284956	-2.26267	8	8	0.208386	contigs_merge_contig_10132	0	2248	0.284956	-2.26267	0.208386	0.367923	0.513466	-1.44253	13	13	0.367923	contigs_merge_contig_10132	0	2248	0.513466	-1.44253	0.367923
contigs_merge_contig_10133	0.0503556	0.0503556	0.0503556	1.08651	0.119703	0.119703	0.119703	0.846678	0.0866554	0.0866554	0.0866554	1.10887	8.66554e-08	1.10887	0.0668849	0.946673	1	8.66554e-08	1.10887	0.0668849	0.946673	1	0.582073	0.79595	-0.780728	5	5	0.582073	contigs_merge_contig_10133	0	503	0.79595	-0.780728	0.582073	0.632428	0.882605	-0.661026	5	5	0.632428	contigs_merge_contig_10133	0	503	0.882605	-0.661026	0.632428
contigs_merge_contig_10134	0	0	0	1	#NUM!	0	#NUM!	#NUM!	0	0	0	1	0	1	0	1	1	0	1	0	1	1	0	0	#DIV/0!	0	0	0	contigs_merge_contig_10134	0	312	0	#DIV/0!	0	0	0	#DIV/0!	0	0	0	contigs_merge_contig_10134	0	312	0	#DIV/0!	0
contigs_merge_contig_10135	0.493196	0.493196	0.493196	#DIV/0!	#DIV/0!	0	#DIV/0!	0	0.688295	0.688295	0.688295	#DIV/0!	6.88295e-07	#DIV/0!	0.829636	0.406745	1	6.88295e-07	#DIV/0!	0.829636	0.406745	1	0	0	#DIV/0!	0	0	0	contigs_merge_contig_10135	0	645	0	#DIV/0!	0	0.493196	0.688295	-1.01977	5	5	0.493196	contigs_merge_contig_10135	0	645	0.688295	-1.01977	0.493196
contigs_merge_contig_10136	7.46286	7.46286	-7.46286	-2.01848	1.01327	1.01327	-1.01327	-1.35265	9.99882	9.99882	-9.99882	-1.97778	-9.99882e-06	-1.97778	-1.81197	0.0699901	1	-9.99882e-06	-1.97778	-1.81198	0.06999	1	14.7903	20.2248	3.88658	180	318	14.7903	contigs_merge_contig_10136	0	1259	20.2248	3.88658	14.7903	7.32743	10.226	2.87331	81	145	7.32743	contigs_merge_contig_10136	0	1259	10.226	2.87331	7.32743
contigs_merge_contig_10137	0	0	0	1	#NUM!	0	#NUM!	#NUM!	0	0	0	1	0	1	0	1	1	0	1	0	1	1	0	0	#DIV/0!	0	0	0	contigs_merge_contig_10137	0	350	0	#DIV/0!	0	0	0	#DIV/0!	0	0	0	contigs_merge_contig_10137	0	350	0	#DIV/0!	0
contigs_merge_contig_10138	0.0298684	0.0298684	0.0298684	1.35814	0.441631	0.441631	0.441631	0.876771	0.0440307	0.0440307	0.0440307	1.38609	4.40307e-08	1.38609	0.0844069	0.932733	1	4.40307e-08	1.38609	0.0844069	0.932733	1	0.083399	0.114043	-3.58383	8	8	0.083399	contigs_merge_contig_10138	0	5617	0.114043	-3.58383	0.083399	0.113267	0.158074	-3.1422	10	10	0.113267	contigs_merge_contig_10138	0	5617	0.158074	-3.1422	0.113267
contigs_merge_contig_10139	0	0	0	1	#NUM!	0	#NUM!	#NUM!	0	0	0	1	0	1	0	1	1	0	1	0	1	1	0	0	#DIV/0!	0	0	0	contigs_merge_contig_10139	0	955	0	#DIV/0!	0	0	0	#DIV/0!	0	0	0	contigs_merge_contig_10139	0	955	0	#DIV/0!	0
contigs_merge_contig_1014	0.113229	0.113229	0.113229	1.81085	0.856668	0.856668	0.856668	0.698377	0.16195	0.16195	0.16195	1.84812	1.6195e-07	1.84812	0.219604	0.82618	1	1.6195e-07	1.84812	0.219604	0.82618	1	0.139642	0.190952	-2.8402	3	3	0.139642	contigs_merge_contig_1014	0	1258	0.190952	-2.8402	0.139642	0.252871	0.352902	-1.98353	5	5	0.252871	contigs_merge_contig_1014	0	1258	0.352902	-1.98353	0.252871
contigs_merge_contig_10140	1.5281	1.5281	-1.5281	-1.12067	0.164362	0.164362	-0.164362	-1.04488	1.73323	1.73323	-1.73323	-1.09807	-1.73323e-06	-1.09807	-0.28464	0.77592	1	-1.73323e-06	-1.09807	-0.28464	0.77592	1	14.1915	19.4061	3.82696	1237	1617	14.1915	contigs_merge_contig_10140	0	6672	19.4061	3.82696	14.1915	12.6634	17.6729	3.6626	980	1328	12.6634	contigs_merge_contig_10140	0	6672	17.6729	3.6626	12.6634
contigs_merge_contig_10141	0.124384	0.124384	0.124384	#DIV/0!	#DIV/0!	0	#DIV/0!	0	0.173588	0.173588	0.173588	#DIV/0!	1.73588e-07	#DIV/0!	0.416639	0.676943	1	1.73588e-07	#DIV/0!	0.416639	0.676943	1	0	0	#DIV/0!	0	0	0	contigs_merge_contig_10141	0	1023	0	#DIV/0!	0	0.124384	0.173588	-3.00713	0	2	0.124384	contigs_merge_contig_10141	0	1023	0.173588	-3.00713	0.124384
contigs_merge_contig_10142	0.711744	0.711744	0.711744	2.85209	1.51202	1.51202	1.51202	-0.0958856	1.00411	1.00411	1.00411	2.91078	1.00411e-06	2.91078	0.700431	0.483658	1	1.00411e-06	2.91078	0.700431	0.483659	1	0.384292	0.525497	-1.37972	8	8	0.384292	contigs_merge_contig_10142	0	1219	0.525497	-1.37972	0.384292	1.09604	1.52961	0.132296	21	21	1.09604	contigs_merge_contig_10142	0	1219	1.52961	0.132296	1.09604
contigs_merge_contig_10143	4.79433	4.79433	-4.79433	-4.72194	2.23938	2.23938	-2.23938	-7.13066	6.51971	6.51971	-6.51971	-4.62672	-6.51971e-06	-4.62672	-2.04996	0.0403687	1	-6.51971e-06	-4.62672	-2.04996	0.0403687	1	6.08246	8.3174	2.60465	98	118	6.08246	contigs_merge_contig_10143	0	1136	8.3174	2.60465	6.08246	1.28813	1.79769	0.365275	18	23	1.28813	contigs_merge_contig_10143	0	1136	1.79769	0.365275	1.28813
contigs_merge_contig_10144	0	0	0	1	#NUM!	0	#NUM!	#NUM!	0	0	0	1	0	1	0	1	1	0	1	0	1	1	0	0	#DIV/0!	0	0	0	contigs_merge_contig_10144	0	405	0	#DIV/0!	0	0	0	#DIV/0!	0	0	0	contigs_merge_contig_10144	0	405	0	#DIV/0!	0
contigs_merge_contig_10145	0.0997215	0.0997215	0.0997215	#DIV/0!	#DIV/0!	0	#DIV/0!	0	0.139169	0.139169	0.139169	#DIV/0!	1.39169e-07	#DIV/0!	0.373054	0.709108	1	1.39169e-07	#DIV/0!	0.373054	0.709108	1	0	0	#DIV/0!	0	0	0	contigs_merge_contig_10145	0	1276	0	#DIV/0!	0	0.0997215	0.139169	-3.32595	2	2	0.0997215	contigs_merge_contig_10145	0	1276	0.139169	-3.32595	0.0997215
contigs_merge_contig_10146	0.0185559	0.0185559	0.0185559	1.08651	0.119703	0.119703	0.119703	0.946104	0.0319324	0.0319324	0.0319324	1.10887	3.19324e-08	1.10887	0.0406018	0.967613	1	3.19324e-08	1.10887	0.0406018	0.967613	1	0.214493	0.293306	-2.221	2	2	0.214493	contigs_merge_contig_10146	0	546	0.293306	-2.221	0.214493	0.233049	0.325238	-2.1013	2	2	0.233049	contigs_merge_contig_10146	0	546	0.325238	-2.1013	0.233049
contigs_merge_contig_10147	0.185013	0.185013	-0.185013	#DIV/0!	#DIV/0!	0	#DIV/0!	0	0.252994	0.252994	-0.252994	#DIV/0!	-2.52994e-07	#DIV/0!	-0.502985	0.614975	1	-2.52994e-07	#DIV/0!	-0.502985	0.614975	1	0.185013	0.252994	-2.4343	4	4	0.185013	contigs_merge_contig_10147	0	1266	0.252994	-2.4343	0.185013	0	0	#DIV/0!	0	0	0	contigs_merge_contig_10147	0	1266	0	#DIV/0!	0
contigs_merge_contig_10148	0.605427	0.605427	0.605427	1.18352	0.243085	0.243085	0.243085	1.14116	0.937759	0.937759	0.937759	1.20788	9.37759e-07	1.20788	0.297141	0.766359	1	9.37759e-07	1.20788	0.297141	0.766359	1	3.29896	4.51113	1.72201	112	112	3.29896	contigs_merge_contig_10148	0	1988	4.51113	1.72201	3.29896	3.90439	5.44889	1.9651	122	122	3.90439	contigs_merge_contig_10148	0	1988	5.44889	1.9651	3.90439
contigs_merge_contig_10149	0.153958	0.153958	-0.153958	-1.05507	0.0773343	0.0773343	-0.0773343	-1.05214	0.13185	0.13185	-0.13185	-1.03379	-1.3185e-07	-1.03379	-0.0468054	0.962668	1	-1.3185e-07	-1.03379	-0.0468054	0.962668	1	2.94979	4.03367	1.56061	47	47	2.94979	contigs_merge_contig_10149	0	933	4.03367	1.56061	2.94979	2.79584	3.90182	1.48328	41	41	2.79584	contigs_merge_contig_10149	0	933	3.90182	1.48328	2.79584
contigs_merge_contig_1015	0.903403	0.903403	-0.903403	-1.33371	0.415441	0.415441	-0.415441	-1.28914	1.15917	1.15917	-1.15917	-1.30681	-1.15917e-06	-1.30681	-0.392649	0.694579	1	-1.15917e-06	-1.30681	-0.392649	0.694579	1	3.61058	4.93726	1.85223	244	555	3.61058	contigs_merge_contig_1015	0	9001	4.93726	1.85223	3.61058	2.70718	3.77809	1.43679	127	383	2.70718	contigs_merge_contig_1015	0	9001	3.77809	1.43679	2.70718
contigs_merge_contig_10150	0.700899	0.700899	0.700899	2.17302	1.1197	1.1197	1.1197	-0.5071	0.994976	0.994976	0.994976	2.21774	9.94976e-07	2.21774	0.613633	0.539458	1	9.94976e-07	2.21774	0.613633	0.539458	1	0.597516	0.817067	-0.742952	4	4	0.597516	contigs_merge_contig_10150	0	392	0.817067	-0.742952	0.597516	1.29841	1.81204	0.376751	8	8	1.29841	contigs_merge_contig_10150	0	392	1.81204	0.376751	1.29841
contigs_merge_contig_10151	3.8805	3.8805	3.8805	2.37057	1.24523	1.24523	1.24523	1.82934	5.49523	5.49523	5.49523	2.41935	5.49523e-06	2.41935	1.51032	0.130963	1	5.49523e-06	2.41935	1.51032	0.130963	1	2.8313	3.87164	1.50147	22	22	2.8313	contigs_merge_contig_10151	0	455	3.87164	1.50147	2.8313	6.7118	9.36687	2.7467	48	48	6.7118	contigs_merge_contig_10151	0	455	9.36687	2.7467	6.7118
contigs_merge_contig_10152	0.746717	0.746717	0.746717	7.60558	2.92706	2.92706	2.92706	0.069313	1.04529	1.04529	1.04529	7.76209	1.04529e-06	7.76209	0.898161	0.3691	1	1.04529e-06	7.76209	0.898162	0.3691	1	0.113043	0.15458	-3.14505	0	1	0.113043	contigs_merge_contig_10152	0	518	0.15458	-3.14505	0.113043	0.859761	1.19987	-0.217993	1	7	0.859761	contigs_merge_contig_10152	0	518	1.19987	-0.217993	0.859761
contigs_merge_contig_10153	0.248265	0.248265	-0.248265	-1.25506	0.327756	0.327756	-0.327756	7.41357	0.312096	0.312096	-0.312096	-1.22975	-3.12096e-07	-1.22975	-0.179327	0.857681	1	-3.12096e-07	-1.22975	-0.179327	0.857681	1	1.22162	1.6705	0.288801	15	15	1.22162	contigs_merge_contig_10153	0	719	1.6705	0.288801	1.22162	0.973359	1.3584	-0.0389557	11	11	0.973359	contigs_merge_contig_10153	0	719	1.3584	-0.0389557	0.973359
contigs_merge_contig_10154	0.00551227	0.00551227	0.00551227	1.08651	0.119703	0.119703	0.119703	0.969865	0.00948589	0.00948589	0.00948589	1.10887	9.48589e-09	1.10887	0.0221294	0.982345	1	9.48589e-09	1.10887	0.0221294	0.982345	1	0.0637177	0.0871301	-3.97216	0	2	0.0637177	contigs_merge_contig_10154	0	1838	0.0871301	-3.97216	0.0637177	0.0692299	0.096616	-3.85246	0	2	0.0692299	contigs_merge_contig_10154	0	1838	0.096616	-3.85246	0.0692299
contigs_merge_contig_10155	0	0	0	1	#NUM!	0	#NUM!	#NUM!	0	0	0	1	0	1	0	1	1	0	1	0	1	1	0	0	#DIV/0!	0	0	0	contigs_merge_contig_10155	0	300	0	#DIV/0!	0	0	0	#DIV/0!	0	0	0	contigs_merge_contig_10155	0	300	0	#DIV/0!	0
contigs_merge_contig_10156	1.25892	1.25892	1.25892	2.58977	1.37282	1.37282	1.37282	-3.07817	1.77921	1.77921	1.77921	2.64306	1.77921e-06	2.64306	0.895793	0.370363	1	1.77921e-06	2.64306	0.895793	0.370363	1	0.791891	1.08286	-0.336627	21	73	0.791891	contigs_merge_contig_10156	0	5398	1.08286	-0.336627	0.791891	2.05081	2.86207	1.03619	57	174	2.05081	contigs_merge_contig_10156	0	5398	2.86207	1.03619	2.05081
contigs_merge_contig_10157	0.243634	0.243634	0.243634	2.71628	1.44163	1.44163	1.44163	0.488147	0.344007	0.344007	0.344007	2.77218	3.44007e-07	2.77218	0.402014	0.687674	1	3.44007e-07	2.77218	0.402014	0.687674	1	0.141955	0.194115	-2.81649	2	2	0.141955	contigs_merge_contig_10157	0	825	0.194115	-2.81649	0.141955	0.38559	0.538122	-1.37486	5	5	0.38559	contigs_merge_contig_10157	0	825	0.538122	-1.37486	0.38559
contigs_merge_contig_10158	0.055792	0.055792	0.055792	1.03351	0.0475527	0.0475527	0.0475527	1.06466	0.124715	0.124715	0.124715	1.05478	1.24715e-07	1.05478	0.0576614	0.954018	1	1.24715e-07	1.05478	0.0576614	0.954018	1	1.66492	2.27668	0.735455	82	82	1.66492	contigs_merge_contig_10158	0	2884	2.27668	0.735455	1.66492	1.72071	2.4014	0.783007	78	78	1.72071	contigs_merge_contig_10158	0	2884	2.4014	0.783007	1.72071
contigs_merge_contig_10159	0.0813285	0.0813285	-0.0813285	#DIV/0!	#DIV/0!	0	#DIV/0!	0	0.111212	0.111212	-0.111212	#DIV/0!	-1.11212e-07	#DIV/0!	-0.333484	0.738769	1	-1.11212e-07	#DIV/0!	-0.333485	0.738769	1	0.0813285	0.111212	-3.62009	2	2	0.0813285	contigs_merge_contig_10159	0	1440	0.111212	-3.62009	0.0813285	0	0	#DIV/0!	0	0	0	contigs_merge_contig_10159	0	1440	0	#DIV/0!	0
contigs_merge_contig_1016	0	0	0	1	#NUM!	0	#NUM!	#NUM!	0	0	0	1	0	1	0	1	1	0	1	0	1	1	0	0	#DIV/0!	0	0	0	contigs_merge_contig_1016	0	1565	0	#DIV/0!	0	0	0	#DIV/0!	0	0	0	contigs_merge_contig_1016	0	1565	0	#DIV/0!	0
contigs_merge_contig_10160	4.24188	4.24188	4.24188	1.28294	0.359456	0.359456	0.359456	1.09202	6.34178	6.34178	6.34178	1.30934	6.34178e-06	1.30934	0.921696	0.356687	1	6.34178e-06	1.30934	0.921696	0.356687	1	14.9921	20.5007	3.90613	432	531	14.9921	contigs_merge_contig_10160	0	2074	20.5007	3.90613	14.9921	19.2339	26.8425	4.26558	505	627	19.2339	contigs_merge_contig_10160	0	2074	26.8425	4.26558	19.2339
contigs_merge_contig_10161	0.293634	0.293634	-0.293634	-1.4726	0.558369	0.558369	-0.558369	-0.186775	0.384043	0.384043	-0.384043	-1.44291	-3.84043e-07	-1.44291	-0.263872	0.791878	1	-3.84043e-07	-1.44291	-0.263872	0.791878	1	0.914946	1.25113	-0.128242	8	8	0.914946	contigs_merge_contig_10161	0	512	1.25113	-0.128242	0.914946	0.621312	0.867091	-0.686611	5	5	0.621312	contigs_merge_contig_10161	0	512	0.867091	-0.686611	0.621312
contigs_merge_contig_10162	0.317304	0.317304	0.317304	5.43255	2.44163	2.44163	2.44163	0.358175	0.444839	0.444839	0.444839	5.54435	4.44839e-07	5.54435	0.555781	0.57836	1	4.44839e-07	5.54435	0.555781	0.57836	1	0.071585	0.0978882	-3.8042	1	1	0.071585	contigs_merge_contig_10162	0	818	0.0978882	-3.8042	0.071585	0.388889	0.542727	-1.36257	5	5	0.388889	contigs_merge_contig_10162	0	818	0.542727	-1.36257	0.388889
contigs_merge_contig_10163	0.0716057	0.0716057	0.0716057	1.62977	0.704665	0.704665	0.704665	0.775346	0.103131	0.103131	0.103131	1.66331	1.03131e-07	1.66331	0.160266	0.872672	1	1.03131e-07	1.66331	0.160266	0.872672	1	0.113702	0.155481	-3.13667	2	2	0.113702	contigs_merge_contig_10163	0	1030	0.155481	-3.13667	0.113702	0.185308	0.258612	-2.43201	3	3	0.185308	contigs_merge_contig_10163	0	1030	0.258612	-2.43201	0.185308
contigs_merge_contig_10164	0.0479411	0.0479411	0.0479411	1.08651	0.119703	0.119703	0.119703	0.859441	0.0825003	0.0825003	0.0825003	1.10887	8.25003e-08	1.10887	0.0652617	0.947966	1	8.25003e-08	1.10887	0.0652617	0.947966	1	0.554163	0.757785	-0.851618	3	3	0.554163	contigs_merge_contig_10164	0	317	0.757785	-0.851618	0.554163	0.602104	0.840285	-0.731916	3	3	0.602104	contigs_merge_contig_10164	0	317	0.840285	-0.731916	0.602104
contigs_merge_contig_10165	0.220127	0.220127	-0.220127	-1.84075	0.880297	0.880297	-0.880297	-0.544678	0.293642	0.293642	-0.293642	-1.80364	-2.93642e-07	-1.80364	-0.29012	0.771724	1	-2.93642e-07	-1.80364	-0.29012	0.771724	1	0.481947	0.659033	-1.05305	4	4	0.481947	contigs_merge_contig_10165	0	486	0.659033	-1.05305	0.481947	0.26182	0.365391	-1.93335	2	2	0.26182	contigs_merge_contig_10165	0	486	0.365391	-1.93335	0.26182
contigs_merge_contig_10166	0.300637	0.300637	0.300637	2.39032	1.25721	1.25721	1.25721	0.430955	0.425649	0.425649	0.425649	2.43951	4.25649e-07	2.43951	0.422071	0.672973	1	4.25649e-07	2.43951	0.422071	0.672973	1	0.216235	0.295689	-2.20933	10	10	0.216235	contigs_merge_contig_10166	0	2708	0.295689	-2.20933	0.216235	0.516872	0.721338	-0.95212	22	22	0.516872	contigs_merge_contig_10166	0	2708	0.721338	-0.95212	0.516872
contigs_merge_contig_10167	1.1172	1.1172	-1.1172	-1.31482	0.394871	0.394871	-0.394871	-1.2161	1.42785	1.42785	-1.42785	-1.28831	-1.42785e-06	-1.28831	-0.424147	0.671459	1	-1.42785e-06	-1.28831	-0.424147	0.671459	1	4.66586	6.38028	2.22214	19	20	4.66586	contigs_merge_contig_10167	0	251	6.38028	2.22214	4.66586	3.54865	4.95244	1.82727	14	14	3.54865	contigs_merge_contig_10167	0	251	4.95244	1.82727	3.54865
contigs_merge_contig_10168	5.35442	5.35442	5.35442	1.90694	0.931257	0.931257	0.931257	1.36354	7.63867	7.63867	7.63867	1.94618	7.63867e-06	1.94618	1.56628	0.117284	1	7.63867e-06	1.94618	1.56628	0.117284	1	5.90385	8.07316	2.56166	38	49	5.90385	contigs_merge_contig_10168	0	486	8.07316	2.56166	5.90385	11.2583	15.7118	3.49291	60	86	11.2583	contigs_merge_contig_10168	0	486	15.7118	3.49291	11.2583
contigs_merge_contig_10169	0	0	0	1	#NUM!	0	#NUM!	#NUM!	0	0	0	1	0	1	0	1	1	0	1	0	1	1	0	0	#DIV/0!	0	0	0	contigs_merge_contig_10169	0	1442	0	#DIV/0!	0	0	0	#DIV/0!	0	0	0	contigs_merge_contig_10169	0	1442	0	#DIV/0!	0
contigs_merge_contig_1017	0.732245	0.732245	-0.732245	-1.24022	0.310602	0.310602	-0.310602	-1.19317	0.915523	0.915523	-0.915523	-1.21522	-9.15523e-07	-1.21522	-0.29824	0.76552	1	-9.15523e-07	-1.21522	-0.29824	0.76552	1	3.78041	5.16948	1.91854	29	190	3.78041	contigs_merge_contig_1017	0	2943	5.16948	1.91854	3.78041	3.04816	4.25396	1.60794	20	141	3.04816	contigs_merge_contig_1017	0	2943	4.25396	1.60794	3.04816
contigs_merge_contig_10170	0.11276	0.11276	0.11276	3.80279	1.92706	1.92706	1.92706	0.584286	0.158497	0.158497	0.158497	3.88105	1.58497e-07	3.88105	0.305865	0.759708	1	1.58497e-07	3.88105	0.305865	0.759708	1	0.0402312	0.0550138	-4.63554	2	2	0.0402312	contigs_merge_contig_10170	0	2911	0.0550138	-4.63554	0.0402312	0.152991	0.213511	-2.70848	5	7	0.152991	contigs_merge_contig_10170	0	2911	0.213511	-2.70848	0.152991
contigs_merge_contig_10171	0.806112	0.806112	0.806112	2.56812	1.36071	1.36071	1.36071	-0.417435	1.13946	1.13946	1.13946	2.62097	1.13946e-06	2.62097	0.714208	0.475099	1	1.13946e-06	2.62097	0.714208	0.475099	1	0.514064	0.702952	-0.959981	10	11	0.514064	contigs_merge_contig_10171	0	1253	0.702952	-0.959981	0.514064	1.32018	1.84241	0.40073	23	26	1.32018	contigs_merge_contig_10171	0	1253	1.84241	0.40073	1.32018
contigs_merge_contig_10172	0	0	0	1	#NUM!	0	#NUM!	#NUM!	0	0	0	1	0	1	0	1	1	0	1	0	1	1	0	0	#DIV/0!	0	0	0	contigs_merge_contig_10172	0	584	0	#DIV/0!	0	0	0	#DIV/0!	0	0	0	contigs_merge_contig_10172	0	584	0	#DIV/0!	0
contigs_merge_contig_10173	0	0	0	1	#NUM!	0	#NUM!	#NUM!	0	0	0	1	0	1	0	1	1	0	1	0	1	1	0	0	#DIV/0!	0	0	0	contigs_merge_contig_10173	0	855	0	#DIV/0!	0	0	0	#DIV/0!	0	0	0	contigs_merge_contig_10173	0	855	0	#DIV/0!	0
contigs_merge_contig_10174	0.00623096	0.00623096	0.00623096	1.08651	0.119703	0.119703	0.119703	0.968461	0.0107227	0.0107227	0.0107227	1.10887	1.07227e-08	1.10887	0.0235278	0.981229	1	1.07227e-08	1.10887	0.0235278	0.981229	1	0.0720253	0.0984902	-3.79535	1	1	0.0720253	contigs_merge_contig_10174	0	813	0.0984902	-3.79535	0.0720253	0.0782562	0.109213	-3.67565	1	1	0.0782562	contigs_merge_contig_10174	0	813	0.109213	-3.67565	0.0782562
contigs_merge_contig_10175	0.695319	0.695319	0.695319	1.29347	0.371241	0.371241	0.371241	1.29831	1.03705	1.03705	1.03705	1.32008	1.03705e-06	1.32008	0.378251	0.705244	1	1.03705e-06	1.32008	0.378251	0.705244	1	2.36934	3.23993	1.24448	21	21	2.36934	contigs_merge_contig_10175	0	519	3.23993	1.24448	2.36934	3.06466	4.27698	1.61573	25	25	3.06466	contigs_merge_contig_10175	0	519	4.27698	1.61573	3.06466
contigs_merge_contig_10176	0.89081	0.89081	-0.89081	-1.50712	0.591792	0.591792	-0.591792	-1.72809	1.1687	1.1687	-1.1687	-1.47673	-1.1687e-06	-1.47673	-0.474294	0.63529	1	-1.1687e-06	-1.47673	-0.474294	0.63529	1	2.64742	3.62019	1.40459	69	262	2.64742	contigs_merge_contig_10176	0	5795	3.62019	1.40459	2.64742	1.75661	2.4515	0.812796	34	160	1.75661	contigs_merge_contig_10176	0	5795	2.4515	0.812796	1.75661
contigs_merge_contig_10177	0.0571448	0.0571448	0.0571448	2.17302	1.1197	1.1197	1.1197	0.743156	0.0811212	0.0811212	0.0811212	2.21774	8.11212e-08	2.21774	0.175214	0.860911	1	8.11212e-08	2.21774	0.175214	0.860911	1	0.0487159	0.0666161	-4.35946	0	2	0.0487159	contigs_merge_contig_10177	0	2404	0.0666161	-4.35946	0.0487159	0.105861	0.147737	-3.23976	2	4	0.105861	contigs_merge_contig_10177	0	2404	0.147737	-3.23976	0.105861
contigs_merge_contig_10178	0.178456	0.178456	-0.178456	-3.68151	1.8803	1.8803	-1.8803	-0.519032	0.242155	0.242155	-0.242155	-3.60727	-2.42155e-07	-3.60727	-0.370184	0.711245	1	-2.42155e-07	-3.60727	-0.370184	0.711245	1	0.245006	0.335032	-2.02911	0	8	0.245006	contigs_merge_contig_10178	0	1912	0.335032	-2.02911	0.245006	0.0665505	0.0928767	-3.90941	0	2	0.0665505	contigs_merge_contig_10178	0	1912	0.0928767	-3.90941	0.0665505
contigs_merge_contig_10179	0	0	0	1	#NUM!	0	#NUM!	#NUM!	0	0	0	1	0	1	0	1	1	0	1	0	1	1	0	0	#DIV/0!	0	0	0	contigs_merge_contig_10179	0	705	0	#DIV/0!	0	0	0	#DIV/0!	0	0	0	contigs_merge_contig_10179	0	705	0	#DIV/0!	0
contigs_merge_contig_1018	0	0	0	1	#NUM!	0	#NUM!	#NUM!	0	0	0	1	0	1	0	1	1	0	1	0	1	1	0	0	#DIV/0!	0	0	0	contigs_merge_contig_1018	0	5141	0	#DIV/0!	0	0	0	#DIV/0!	0	0	0	contigs_merge_contig_1018	0	5141	0	#DIV/0!	0
contigs_merge_contig_10180	0.0167464	0.0167464	0.0167464	1.08651	0.119703	0.119703	0.119703	0.949472	0.0288183	0.0288183	0.0288183	1.10887	2.88183e-08	1.10887	0.0385713	0.969232	1	2.88183e-08	1.10887	0.0385713	0.969232	1	0.193575	0.264703	-2.36903	2	2	0.193575	contigs_merge_contig_10180	0	605	0.264703	-2.36903	0.193575	0.210322	0.293521	-2.24933	2	2	0.210322	contigs_merge_contig_10180	0	605	0.293521	-2.24933	0.210322
contigs_merge_contig_10181	0.848516	0.848516	-0.848516	-1.20182	0.265215	0.265215	-0.265215	-1.12801	1.04198	1.04198	-1.04198	-1.17758	-1.04198e-06	-1.17758	-0.291502	0.770667	1	-1.04198e-06	-1.17758	-0.291503	0.770667	1	5.05294	6.90959	2.33712	158	158	5.05294	contigs_merge_contig_10181	0	1831	6.90959	2.33712	5.05294	4.20442	5.86761	2.07191	121	121	4.20442	contigs_merge_contig_10181	0	1831	5.86761	2.07191	4.20442
contigs_merge_contig_10182	0.0138598	0.0138598	0.0138598	1.08651	0.119703	0.119703	0.119703	0.954692	0.023851	0.023851	0.023851	1.10887	2.3851e-08	1.10887	0.03509	0.972008	1	2.3851e-08	1.10887	0.03509	0.972008	1	0.160209	0.219077	-2.64197	2	2	0.160209	contigs_merge_contig_10182	0	731	0.219077	-2.64197	0.160209	0.174069	0.242928	-2.52227	2	2	0.174069	contigs_merge_contig_10182	0	731	0.242928	-2.52227	0.174069
contigs_merge_contig_10183	0.648938	0.648938	0.648938	1.81085	0.856668	0.856668	0.856668	-1.66579	0.928168	0.928168	0.928168	1.84812	9.28168e-07	1.84812	0.52573	0.599076	1	9.28168e-07	1.84812	0.52573	0.599076	1	0.800317	1.09439	-0.321356	5	6	0.800317	contigs_merge_contig_10183	0	439	1.09439	-0.321356	0.800317	1.44926	2.02255	0.535312	10	10	1.44926	contigs_merge_contig_10183	0	439	2.02255	0.535312	1.44926
contigs_merge_contig_10184	0	0	0	1	#NUM!	0	#NUM!	#NUM!	0	0	0	1	0	1	0	1	1	0	1	0	1	1	0	0	#DIV/0!	0	0	0	contigs_merge_contig_10184	0	255	0	#DIV/0!	0	0	0	#DIV/0!	0	0	0	contigs_merge_contig_10184	0	255	0	#DIV/0!	0
contigs_merge_contig_10185	0	0	0	1	#NUM!	0	#NUM!	#NUM!	0	0	0	1	0	1	0	1	1	0	1	0	1	1	0	0	#DIV/0!	0	0	0	contigs_merge_contig_10185	0	3714	0	#DIV/0!	0	0	0	#DIV/0!	0	0	0	contigs_merge_contig_10185	0	3714	0	#DIV/0!	0
contigs_merge_contig_10186	0.157294	0.157294	-0.157294	-1.49426	0.579431	0.579431	-0.579431	-0.649213	0.206135	0.206135	-0.206135	-1.46413	-2.06135e-07	-1.46413	-0.197044	0.843793	1	-2.06135e-07	-1.46413	-0.197044	0.843793	1	0.475537	0.650269	-1.07237	89	138	0.475537	contigs_merge_contig_10186	0	16993	0.650269	-1.07237	0.475537	0.318243	0.444133	-1.6518	67	85	0.318243	contigs_merge_contig_10186	0	16993	0.444133	-1.6518	0.318243
contigs_merge_contig_10187	0.301667	0.301667	0.301667	4.34604	2.1197	2.1197	2.1197	0.389386	0.423538	0.423538	0.423538	4.43548	4.23538e-07	4.43548	0.517394	0.604881	1	4.23538e-07	4.43548	0.517394	0.604882	1	0.0901563	0.123283	-3.47143	2	2	0.0901563	contigs_merge_contig_10187	0	1299	0.123283	-3.47143	0.0901563	0.391823	0.546821	-1.35173	8	8	0.391823	contigs_merge_contig_10187	0	1299	0.546821	-1.35173	0.391823
contigs_merge_contig_10188	0.0841299	0.0841299	0.0841299	1.62977	0.704665	0.704665	0.704665	0.757357	0.121169	0.121169	0.121169	1.66331	1.21169e-07	1.66331	0.173717	0.862088	1	1.21169e-07	1.66331	0.173717	0.862088	1	0.133589	0.182675	-2.90413	6	6	0.133589	contigs_merge_contig_10188	0	2630	0.182675	-2.90413	0.133589	0.217719	0.303844	-2.19946	6	9	0.217719	contigs_merge_contig_10188	0	2630	0.303844	-2.19946	0.217719
contigs_merge_contig_10189	2.22745	2.22745	2.22745	1.47323	0.558988	0.558988	0.558988	1.25013	3.24104	3.24104	3.24104	1.50355	3.24104e-06	1.50355	0.8074	0.419436	1	3.24104e-06	1.50355	0.8074	0.419436	1	4.70686	6.43635	2.23476	109	118	4.70686	contigs_merge_contig_10189	0	1468	6.43635	2.23476	4.70686	6.93431	9.6774	2.79375	150	160	6.93431	contigs_merge_contig_10189	0	1468	9.6774	2.79375	6.93431
contigs_merge_contig_1019	265.03	265.03	265.03	1.46177	0.547717	0.547717	0.547717	1.05976	386.023	386.023	386.023	1.49185	0.000386023	1.49185	8.73324	0	0	0.000386023	1.49185	8.7334	0	0	573.943	784.833	9.16476	52791	52791	573.943	contigs_merge_contig_1019	0	5386	784.833	9.16476	573.943	838.973	1170.86	9.71248	71024	71024	838.973	contigs_merge_contig_1019	0	5386	1170.86	9.71248	838.973
contigs_merge_contig_10190	3.5309	3.5309	3.5309	2.15604	1.10839	1.10839	1.10839	1.68808	5.01361	5.01361	5.01361	2.20041	5.01361e-06	2.20041	1.37132	0.170275	1	5.01361e-06	2.20041	1.37132	0.170275	1	3.05429	4.17656	1.61084	47	64	3.05429	contigs_merge_contig_10190	0	1227	4.17656	1.61084	3.05429	6.58519	9.19017	2.71923	94	127	6.58519	contigs_merge_contig_10190	0	1227	9.19017	2.71923	6.58519
contigs_merge_contig_10191	1.88504	1.88504	1.88504	5.76687	2.52779	2.52779	2.52779	-0.8886	2.64186	2.64186	2.64186	5.88554	2.64186e-06	5.88554	1.36912	0.170961	1	2.64186e-06	5.88554	1.36912	0.170961	1	0.395447	0.54075	-1.33844	13	13	0.395447	contigs_merge_contig_10191	0	1925	0.54075	-1.33844	0.395447	2.28049	3.18261	1.18934	69	69	2.28049	contigs_merge_contig_10191	0	1925	3.18261	1.18934	2.28049
contigs_merge_contig_10192	0.299687	0.299687	0.299687	2.03283	1.02349	1.02349	1.02349	0.42664	0.426403	0.426403	0.426403	2.07466	4.26403e-07	2.07466	0.386053	0.699457	1	4.26403e-07	2.07466	0.386053	0.699457	1	0.290162	0.396779	-1.78507	29	31	0.290162	contigs_merge_contig_10192	0	6256	0.396779	-1.78507	0.290162	0.589849	0.823182	-0.761583	46	58	0.589849	contigs_merge_contig_10192	0	6256	0.823182	-0.761583	0.589849
contigs_merge_contig_10193	0.41222	0.41222	0.41222	2.71628	1.44163	1.44163	1.44163	0.29943	0.582046	0.582046	0.582046	2.77218	5.82046e-07	2.77218	0.522921	0.601029	1	5.82046e-07	2.77218	0.522921	0.601029	1	0.240183	0.328435	-2.0578	10	10	0.240183	contigs_merge_contig_10193	0	2438	0.328435	-2.0578	0.240183	0.652403	0.910481	-0.616166	25	25	0.652403	contigs_merge_contig_10193	0	2438	0.910481	-0.616166	0.652403
contigs_merge_contig_10194	0.34113	0.34113	0.34113	1.29619	0.374275	0.374275	0.374275	2.83643	0.508485	0.508485	0.508485	1.32286	5.08485e-07	1.32286	0.26585	0.790355	1	5.08485e-07	1.32286	0.26585	0.790355	1	1.15173	1.57493	0.203806	17	57	1.15173	contigs_merge_contig_10194	0	2898	1.57493	0.203806	1.15173	1.49286	2.08341	0.578082	24	68	1.49286	contigs_merge_contig_10194	0	2898	2.08341	0.578082	1.49286
contigs_merge_contig_10195	0	0	0	1	#NUM!	0	#NUM!	#NUM!	0	0	0	1	0	1	0	1	1	0	1	0	1	1	0	0	#DIV/0!	0	0	0	contigs_merge_contig_10195	0	984	0	#DIV/0!	0	0	0	#DIV/0!	0	0	0	contigs_merge_contig_10195	0	984	0	#DIV/0!	0
contigs_merge_contig_10196	0.147084	0.147084	0.147084	2.17302	1.1197	1.1197	1.1197	0.626208	0.208796	0.208796	0.208796	2.21774	2.08796e-07	2.21774	0.281101	0.778633	1	2.08796e-07	2.21774	0.281101	0.778633	1	0.125389	0.171462	-2.99552	3	3	0.125389	contigs_merge_contig_10196	0	1401	0.171462	-2.99552	0.125389	0.272472	0.380257	-1.87582	3	6	0.272472	contigs_merge_contig_10196	0	1401	0.380257	-1.87582	0.272472
contigs_merge_contig_10197	0	0	0	1	#NUM!	0	#NUM!	#NUM!	0	0	0	1	0	1	0	1	1	0	1	0	1	1	0	0	#DIV/0!	0	0	0	contigs_merge_contig_10197	0	273	0	#DIV/0!	0	0	0	#DIV/0!	0	0	0	contigs_merge_contig_10197	0	273	0	#DIV/0!	0
contigs_merge_contig_10198	0.87099	0.87099	0.87099	5.43255	2.44163	2.44163	2.44163	-0.0401379	1.22107	1.22107	1.22107	5.54435	1.22107e-06	5.54435	0.920815	0.357147	1	1.22107e-06	5.54435	0.920816	0.357147	1	0.196498	0.2687	-2.34741	1	1	0.196498	contigs_merge_contig_10198	0	298	0.2687	-2.34741	0.196498	1.06749	1.48977	0.0942202	5	5	1.06749	contigs_merge_contig_10198	0	298	1.48977	0.0942202	1.06749
contigs_merge_contig_10199	0.0179319	0.0179319	0.0179319	1.08651	0.119703	0.119703	0.119703	0.947276	0.0308585	0.0308585	0.0308585	1.10887	3.08585e-08	1.10887	0.0399133	0.968162	1	3.08585e-08	1.10887	0.0399133	0.968162	1	0.20728	0.283443	-2.27035	2	2	0.20728	contigs_merge_contig_10199	0	565	0.283443	-2.27035	0.20728	0.225212	0.314301	-2.15065	2	2	0.225212	contigs_merge_contig_10199	0	565	0.314301	-2.15065	0.225212
contigs_merge_contig_102	0	0	0	1	#NUM!	0	#NUM!	#NUM!	0	0	0	1	0	1	0	1	1	0	1	0	1	1	0	0	#DIV/0!	0	0	0	contigs_merge_contig_102	0	1582	0	#DIV/0!	0	0	0	#DIV/0!	0	0	0	contigs_merge_contig_102	0	1582	0	#DIV/0!	0
contigs_merge_contig_1020	0.339238	0.339238	0.339238	2.71628	1.44163	1.44163	1.44163	0.383632	0.478996	0.478996	0.478996	2.77218	4.78996e-07	2.77218	0.474377	0.635231	1	4.78996e-07	2.77218	0.474377	0.635231	1	0.197659	0.270287	-2.33891	0	8	0.197659	contigs_merge_contig_1020	0	2370	0.270287	-2.33891	0.197659	0.536897	0.749284	-0.897283	0	20	0.536897	contigs_merge_contig_1020	0	2370	0.749284	-0.897283	0.536897
contigs_merge_contig_10200	0.073656	0.073656	-0.073656	#DIV/0!	#DIV/0!	0	#DIV/0!	0	0.10072	0.10072	-0.10072	#DIV/0!	-1.0072e-07	#DIV/0!	-0.317364	0.750967	1	-1.0072e-07	#DIV/0!	-0.317364	0.750967	1	0.073656	0.10072	-3.76305	1	1	0.073656	contigs_merge_contig_10200	0	795	0.10072	-3.76305	0.073656	0	0	#DIV/0!	0	0	0	contigs_merge_contig_10200	0	795	0	#DIV/0!	0
contigs_merge_contig_10201	0.0760474	0.0760474	-0.0760474	#DIV/0!	#DIV/0!	0	#DIV/0!	0	0.10399	0.10399	-0.10399	#DIV/0!	-1.0399e-07	#DIV/0!	-0.322475	0.747093	1	-1.0399e-07	#DIV/0!	-0.322475	0.747093	1	0.0760474	0.10399	-3.71696	2	4	0.0760474	contigs_merge_contig_10201	0	3080	0.10399	-3.71696	0.0760474	0	0	#DIV/0!	0	0	0	contigs_merge_contig_10201	0	3080	0	#DIV/0!	0
contigs_merge_contig_10202	1.67507	1.67507	1.67507	2.53519	1.34209	1.34209	1.34209	11.6682	2.3684	2.3684	2.3684	2.58736	2.3684e-06	2.58736	1.02371	0.30597	1	2.3684e-06	2.58736	1.02372	0.30597	1	1.09112	1.49204	0.125804	12	12	1.09112	contigs_merge_contig_10202	0	644	1.49204	0.125804	1.09112	2.76619	3.86044	1.4679	28	28	2.76619	contigs_merge_contig_10202	0	644	3.86044	1.4679	2.76619
contigs_merge_contig_10203	0.27922	0.27922	0.27922	2.17302	1.1197	1.1197	1.1197	0.459278	0.396373	0.396373	0.396373	2.21774	3.96373e-07	2.21774	0.387306	0.69853	1	3.96373e-07	2.21774	0.387306	0.69853	1	0.238035	0.325498	-2.07076	6	6	0.238035	contigs_merge_contig_10203	0	1476	0.325498	-2.07076	0.238035	0.517254	0.721871	-0.951054	12	12	0.517254	contigs_merge_contig_10203	0	1476	0.721871	-0.951054	0.517254
contigs_merge_contig_10204	0.263389	0.263389	0.263389	1.18999	0.250947	0.250947	0.250947	1.53247	0.406594	0.406594	0.406594	1.21448	4.06594e-07	1.21448	0.198443	0.842699	1	4.06594e-07	1.21448	0.198443	0.842699	1	1.38634	1.89574	0.471285	21	21	1.38634	contigs_merge_contig_10204	0	887	1.89574	0.471285	1.38634	1.64973	2.30234	0.722232	23	23	1.64973	contigs_merge_contig_10204	0	887	2.30234	0.722232	1.64973
contigs_merge_contig_10205	3.27414	3.27414	3.27414	3.39203	1.76215	1.76215	1.76215	4.89101	4.60784	4.60784	4.60784	3.46184	4.60784e-06	3.46184	1.59449	0.110826	1	4.60784e-06	3.46184	1.59449	0.110826	1	1.36877	1.87171	0.452877	24	41	1.36877	contigs_merge_contig_10205	0	1754	1.87171	0.452877	1.36877	4.6429	6.47955	2.21503	67	128	4.6429	contigs_merge_contig_10205	0	1754	6.47955	2.21503	4.6429
contigs_merge_contig_10206	0.380202	0.380202	0.380202	3.25953	1.70467	1.70467	1.70467	0.337012	0.535338	0.535338	0.535338	3.32661	5.35338e-07	3.32661	0.53654	0.591585	1	5.35338e-07	3.32661	0.53654	0.591585	1	0.168266	0.230094	-2.57119	0	2	0.168266	contigs_merge_contig_10206	0	696	0.230094	-2.57119	0.168266	0.548468	0.765432	-0.86652	0	6	0.548468	contigs_merge_contig_10206	0	696	0.765432	-0.86652	0.548468
contigs_merge_contig_10207	0.506278	0.506278	0.506278	#DIV/0!	#DIV/0!	0	#DIV/0!	0	0.706553	0.706553	0.706553	#DIV/0!	7.06553e-07	#DIV/0!	0.840567	0.400591	1	7.06553e-07	#DIV/0!	0.840567	0.400591	1	0	0	#DIV/0!	0	0	0	contigs_merge_contig_10207	0	377	0	#DIV/0!	0	0.506278	0.706553	-0.981998	0	3	0.506278	contigs_merge_contig_10207	0	377	0.706553	-0.981998	0.506278
contigs_merge_contig_10208	0.617187	0.617187	0.617187	1.62977	0.704665	0.704665	0.704665	-23.2081	0.888914	0.888914	0.888914	1.66331	8.88914e-07	1.66331	0.470518	0.637985	1	8.88914e-07	1.66331	0.470518	0.637985	1	0.980026	1.34013	-0.0291087	4	4	0.980026	contigs_merge_contig_10208	0	239	1.34013	-0.0291087	0.980026	1.59721	2.22904	0.675556	6	6	1.59721	contigs_merge_contig_10208	0	239	2.22904	0.675556	1.59721
contigs_merge_contig_10209	0.491069	0.491069	-0.491069	-1.33296	0.414634	0.414634	-0.414634	-1.73966	0.630004	0.630004	-0.630004	-1.30608	-6.30004e-07	-1.30608	-0.28917	0.772451	1	-6.30004e-07	-1.30608	-0.28917	0.772451	1	1.96593	2.68829	0.975209	42	42	1.96593	contigs_merge_contig_10209	0	1251	2.68829	0.975209	1.96593	1.47486	2.05828	0.560576	21	29	1.47486	contigs_merge_contig_10209	0	1251	2.05828	0.560576	1.47486
contigs_merge_contig_1021	0.0927638	0.0927638	0.0927638	1.25185	0.324061	0.324061	0.324061	0.775102	0.139825	0.139825	0.139825	1.27761	1.39825e-07	1.27761	0.130548	0.896133	1	1.39825e-07	1.27761	0.130548	0.896133	1	0.36833	0.50367	-1.44093	5	46	0.36833	contigs_merge_contig_1021	0	7313	0.50367	-1.44093	0.36833	0.461094	0.643495	-1.11687	4	53	0.461094	contigs_merge_contig_1021	0	7313	0.643495	-1.11687	0.461094
contigs_merge_contig_10210	0.707285	0.707285	-0.707285	-4.60189	2.20223	2.20223	-2.20223	-0.06224	0.961644	0.961644	-0.961644	-4.50909	-9.61644e-07	-4.50909	-0.782645	0.433836	1	-9.61644e-07	-4.50909	-0.782645	0.433836	1	0.90365	1.23569	-0.146164	5	5	0.90365	contigs_merge_contig_10210	0	324	1.23569	-0.146164	0.90365	0.196365	0.274044	-2.34839	1	1	0.196365	contigs_merge_contig_10210	0	324	0.274044	-2.34839	0.196365
contigs_merge_contig_10211	0.0695896	0.0695896	0.0695896	#DIV/0!	#DIV/0!	0	#DIV/0!	0	0.097118	0.097118	0.097118	#DIV/0!	9.7118e-08	#DIV/0!	0.311638	0.755316	1	9.7118e-08	#DIV/0!	0.311638	0.755316	1	0	0	#DIV/0!	0	0	0	contigs_merge_contig_10211	0	7314	0	#DIV/0!	0	0.0695896	0.097118	-3.84498	2	8	0.0695896	contigs_merge_contig_10211	0	7314	0.097118	-3.84498	0.0695896
contigs_merge_contig_10212	0.0364975	0.0364975	-0.0364975	-1.61066	0.687652	0.687652	-0.687652	-0.830815	0.0482263	0.0482263	-0.0482263	-1.57818	-4.82263e-08	-1.57818	-0.103996	0.917172	1	-4.82263e-08	-1.57818	-0.103996	0.917172	1	0.0962648	0.131636	-3.37685	7	7	0.0962648	contigs_merge_contig_10212	0	4258	0.131636	-3.37685	0.0962648	0.0597673	0.0834102	-4.0645	4	4	0.0597673	contigs_merge_contig_10212	0	4258	0.0834102	-4.0645	0.0597673
contigs_merge_contig_10213	0	0	0	1	#NUM!	0	#NUM!	#NUM!	0	0	0	1	0	1	0	1	1	0	1	0	1	1	0	0	#DIV/0!	0	0	0	contigs_merge_contig_10213	0	2318	0	#DIV/0!	0	0	0	#DIV/0!	0	0	0	contigs_merge_contig_10213	0	2318	0	#DIV/0!	0
contigs_merge_contig_10214	0.972037	0.972037	0.972037	2.11266	1.07906	1.07906	1.07906	-4.53566	1.38114	1.38114	1.38114	2.15614	1.38114e-06	2.15614	0.711289	0.476905	1	1.38114e-06	2.15614	0.711289	0.476905	1	0.873616	1.19462	-0.194929	9	36	0.873616	contigs_merge_contig_10214	0	2413	1.19462	-0.194929	0.873616	1.84565	2.57576	0.884131	16	70	1.84565	contigs_merge_contig_10214	0	2413	2.57576	0.884131	1.84565
contigs_merge_contig_10215	0.895228	0.895228	0.895228	6.51906	2.70467	2.70467	2.70467	-0.0307032	1.25393	1.25393	1.25393	6.65322	1.25393e-06	6.65322	0.962415	0.335841	1	1.25393e-06	6.65322	0.962415	0.335841	1	0.162206	0.221808	-2.6241	1	1	0.162206	contigs_merge_contig_10215	0	361	0.221808	-2.6241	0.162206	1.05743	1.47574	0.0805681	6	6	1.05743	contigs_merge_contig_10215	0	361	1.47574	0.0805681	1.05743
contigs_merge_contig_10216	0.375372	0.375372	-0.375372	-1.99415	0.995775	0.995775	-0.995775	-0.291336	0.502673	0.502673	-0.502673	-1.95394	-5.02673e-07	-1.95394	-0.402905	0.687018	1	-5.02673e-07	-1.95394	-0.402905	0.687018	1	0.752952	1.02962	-0.409369	13	13	0.752952	contigs_merge_contig_10216	0	1011	1.02962	-0.409369	0.752952	0.37758	0.526944	-1.40514	6	6	0.37758	contigs_merge_contig_10216	0	1011	0.526944	-1.40514	0.37758
contigs_merge_contig_10217	1.40834	1.40834	1.40834	9.7786	3.28963	3.28963	3.28963	-0.246074	1.96997	1.96997	1.96997	9.97983	1.96997e-06	9.97983	1.26931	0.204332	1	1.96997e-06	9.97983	1.26931	0.204332	1	0.160429	0.219377	-2.63999	1	1	0.160429	contigs_merge_contig_10217	0	365	0.219377	-2.63999	0.160429	1.56877	2.18935	0.649633	9	9	1.56877	contigs_merge_contig_10217	0	365	2.18935	0.649633	1.56877
contigs_merge_contig_10218	1.33528	1.33528	1.33528	8.14883	3.02659	3.02659	3.02659	-0.250367	1.86875	1.86875	1.86875	8.31653	1.86875e-06	8.31653	1.21144	0.225727	1	1.86875e-06	8.31653	1.21144	0.225727	1	0.186783	0.255415	-2.42056	2	2	0.186783	contigs_merge_contig_10218	0	627	0.255415	-2.42056	0.186783	1.52206	2.12417	0.60603	15	15	1.52206	contigs_merge_contig_10218	0	627	2.12417	0.60603	1.52206
contigs_merge_contig_10219	0	0	0	1	#NUM!	0	#NUM!	#NUM!	0	0	0	1	0	1	0	1	1	0	1	0	1	1	0	0	#DIV/0!	0	0	0	contigs_merge_contig_10219	0	1146	0	#DIV/0!	0	0	0	#DIV/0!	0	0	0	contigs_merge_contig_10219	0	1146	0	#DIV/0!	0
contigs_merge_contig_1022	0	0	0	1	#NUM!	0	#NUM!	#NUM!	0	0	0	1	0	1	0	1	1	0	1	0	1	1	0	0	#DIV/0!	0	0	0	contigs_merge_contig_1022	0	902	0	#DIV/0!	0	0	0	#DIV/0!	0	0	0	contigs_merge_contig_1022	0	902	0	#DIV/0!	0
contigs_merge_contig_10220	0.731048	0.731048	0.731048	2.17302	1.1197	1.1197	1.1197	-0.641333	1.03778	1.03778	1.03778	2.21774	1.03778e-06	2.21774	0.626692	0.530861	1	1.03778e-06	2.21774	0.626692	0.530861	1	0.623218	0.852214	-0.682191	20	24	0.623218	contigs_merge_contig_10220	0	2255	0.852214	-0.682191	0.623218	1.35427	1.88999	0.437511	34	48	1.35427	contigs_merge_contig_10220	0	2255	1.88999	0.437511	1.35427
contigs_merge_contig_10221	0.585303	0.585303	0.585303	1.46999	0.555802	0.555802	0.555802	2.75571	0.851883	0.851883	0.851883	1.50024	8.51883e-07	1.50024	0.412846	0.67972	1	8.51883e-07	1.50024	0.412846	0.67972	1	1.24536	1.70296	0.316568	51	51	1.24536	contigs_merge_contig_10221	0	2398	1.70296	0.316568	1.24536	1.83067	2.55484	0.872369	69	69	1.83067	contigs_merge_contig_10221	0	2398	2.55484	0.872369	1.83067
contigs_merge_contig_10222	0.247206	0.247206	0.247206	1.35814	0.441631	0.441631	0.441631	0.174215	0.364421	0.364421	0.364421	1.38609	3.64421e-07	1.38609	0.24283	0.808137	1	3.64421e-07	1.38609	0.24283	0.808137	1	0.690254	0.943881	-0.534801	24	24	0.690254	contigs_merge_contig_10222	0	2036	0.943881	-0.534801	0.690254	0.93746	1.3083	-0.0931706	30	30	0.93746	contigs_merge_contig_10222	0	2036	1.3083	-0.0931706	0.93746
contigs_merge_contig_10223	1.28765	1.28765	1.28765	1.66415	0.734785	0.734785	0.734785	1.76928	1.85158	1.85158	1.85158	1.6984	1.85158e-06	1.6984	0.692261	0.488773	1	1.85158e-06	1.6984	0.692262	0.488773	1	1.9388	2.65119	0.955161	75	79	1.9388	contigs_merge_contig_10223	0	2386	2.65119	0.955161	1.9388	3.22645	4.50277	1.68995	120	121	3.22645	contigs_merge_contig_10223	0	2386	4.50277	1.68995	3.22645
contigs_merge_contig_10224	0	0	0	1	#NUM!	0	#NUM!	#NUM!	0	0	0	1	0	1	0	1	1	0	1	0	1	1	0	0	#DIV/0!	0	0	0	contigs_merge_contig_10224	0	297	0	#DIV/0!	0	0	0	#DIV/0!	0	0	0	contigs_merge_contig_10224	0	297	0	#DIV/0!	0
contigs_merge_contig_10225	0.570606	0.570606	0.570606	8.42046	3.0739	3.0739	3.0739	0.169428	0.798491	0.798491	0.798491	8.59375	7.98491e-07	8.59375	0.795003	0.426612	1	7.98491e-07	8.59375	0.795004	0.426612	1	0.0768963	0.105151	-3.70094	4	4	0.0768963	contigs_merge_contig_10225	0	3046	0.105151	-3.70094	0.0768963	0.647502	0.903642	-0.627043	30	31	0.647502	contigs_merge_contig_10225	0	3046	0.903642	-0.627043	0.647502
contigs_merge_contig_10226	3.37398	3.37398	3.37398	1.26644	0.340782	0.340782	0.340782	1.09304	5.06501	5.06501	5.06501	1.29251	5.06501e-06	1.29251	0.803907	0.421451	1	5.06501e-06	1.29251	0.803907	0.421451	1	12.6631	17.316	3.66255	148	157	12.6631	contigs_merge_contig_10226	0	726	17.316	3.66255	12.6631	16.037	22.381	4.00333	167	183	16.037	contigs_merge_contig_10226	0	726	22.381	4.00333	16.037
contigs_merge_contig_10227	0	0	0	1	#NUM!	0	#NUM!	#NUM!	0	0	0	1	0	1	0	1	1	0	1	0	1	1	0	0	#DIV/0!	0	0	0	contigs_merge_contig_10227	0	6474	0	#DIV/0!	0	0	0	#DIV/0!	0	0	0	contigs_merge_contig_10227	0	6474	0	#DIV/0!	0
contigs_merge_contig_10228	0.0171207	0.0171207	0.0171207	2.17302	1.1197	1.1197	1.1197	0.816392	0.024304	0.024304	0.024304	2.21774	2.4304e-08	2.21774	0.0959049	0.923596	1	2.4304e-08	2.21774	0.0959049	0.923596	1	0.0145953	0.0199583	-6.09835	1	1	0.0145953	contigs_merge_contig_10228	0	4012	0.0199583	-6.09835	0.0145953	0.031716	0.0442623	-4.97865	2	2	0.031716	contigs_merge_contig_10228	0	4012	0.0442623	-4.97865	0.031716
contigs_merge_contig_10229	0.450989	0.450989	0.450989	1.11536	0.157505	0.157505	0.157505	1.08007	0.73941	0.73941	0.73941	1.13831	7.3941e-07	1.13831	0.218693	0.826889	1	7.3941e-07	1.13831	0.218693	0.826889	1	3.90953	5.34606	1.967	226	226	3.90953	contigs_merge_contig_10229	0	3385	5.34606	1.967	3.90953	4.36052	6.08547	2.1245	232	232	4.36052	contigs_merge_contig_10229	0	3385	6.08547	2.1245	4.36052
contigs_merge_contig_1023	4.2383	4.2383	-4.2383	-1.25081	0.322867	0.322867	-0.322867	-1.07916	5.32009	5.32009	-5.32009	-1.22559	-5.32009e-06	-1.22559	-0.734351	0.462735	1	-5.32009e-06	-1.22559	-0.734352	0.462735	1	21.1365	28.9029	4.40166	234	723	21.1365	contigs_merge_contig_1023	0	2003	28.9029	4.40166	21.1365	16.8982	23.5828	4.0788	181	532	16.8982	contigs_merge_contig_1023	0	2003	23.5828	4.0788	16.8982
contigs_merge_contig_10230	0.457614	0.457614	0.457614	4.52713	2.1786	2.1786	2.1786	0.260563	0.642288	0.642288	0.642288	4.62029	6.42288e-07	4.62029	0.643217	0.520083	1	6.42288e-07	4.62029	0.643217	0.520083	1	0.129741	0.177413	-2.94629	2	6	0.129741	contigs_merge_contig_10230	0	2708	0.177413	-2.94629	0.129741	0.587355	0.819702	-0.767695	10	25	0.587355	contigs_merge_contig_10230	0	2708	0.819702	-0.767695	0.587355
contigs_merge_contig_10231	1.09046	1.09046	-1.09046	-5.06208	2.33973	2.33973	-2.33973	0.2332	1.48358	1.48358	-1.48358	-4.96	-1.48358e-06	-4.96	-0.992843	0.320786	1	-1.48358e-06	-4.96	-0.992843	0.320787	1	1.35891	1.85822	0.442447	11	11	1.35891	contigs_merge_contig_10231	0	474	1.85822	0.442447	1.35891	0.268449	0.374642	-1.89728	2	2	0.268449	contigs_merge_contig_10231	0	474	0.374642	-1.89728	0.268449
contigs_merge_contig_10232	0.369897	0.369897	0.369897	#DIV/0!	#DIV/0!	0	#DIV/0!	0	0.516222	0.516222	0.516222	#DIV/0!	5.16222e-07	#DIV/0!	0.718486	0.472458	1	5.16222e-07	#DIV/0!	0.718486	0.472458	1	0	0	#DIV/0!	0	0	0	contigs_merge_contig_10232	0	344	0	#DIV/0!	0	0.369897	0.516222	-1.4348	2	2	0.369897	contigs_merge_contig_10232	0	344	0.516222	-1.4348	0.369897
contigs_merge_contig_10233	0.121185	0.121185	0.121185	#DIV/0!	#DIV/0!	0	#DIV/0!	0	0.169124	0.169124	0.169124	#DIV/0!	1.69124e-07	#DIV/0!	0.411247	0.680891	1	1.69124e-07	#DIV/0!	0.411247	0.680892	1	0	0	#DIV/0!	0	0	0	contigs_merge_contig_10233	0	525	0	#DIV/0!	0	0.121185	0.169124	-3.04471	1	1	0.121185	contigs_merge_contig_10233	0	525	0.169124	-3.04471	0.121185
contigs_merge_contig_10234	0.448657	0.448657	0.448657	2.71628	1.44163	1.44163	1.44163	0.255201	0.633494	0.633494	0.633494	2.77218	6.33494e-07	2.77218	0.545543	0.58538	1	6.33494e-07	2.77218	0.545543	0.58538	1	0.261413	0.357467	-1.9356	2	2	0.261413	contigs_merge_contig_10234	0	448	0.357467	-1.9356	0.261413	0.71007	0.990961	-0.493966	5	5	0.71007	contigs_merge_contig_10234	0	448	0.990961	-0.493966	0.71007
contigs_merge_contig_10235	0.0321744	0.0321744	0.0321744	1.22232	0.289628	0.289628	0.289628	0.896142	0.0489745	0.0489745	0.0489745	1.24748	4.89745e-08	1.24748	0.0734356	0.94146	1	4.89745e-08	1.24748	0.0734356	0.94146	1	0.144718	0.197893	-2.78868	8	8	0.144718	contigs_merge_contig_10235	0	3237	0.197893	-2.78868	0.144718	0.176892	0.246868	-2.49906	9	9	0.176892	contigs_merge_contig_10235	0	3237	0.246868	-2.49906	0.176892
contigs_merge_contig_10236	0.631245	0.631245	0.631245	2.00587	1.00423	1.00423	1.00423	-0.494014	0.898614	0.898614	0.898614	2.04715	8.98614e-07	2.04715	0.555704	0.578413	1	8.98614e-07	2.04715	0.555704	0.578413	1	0.627564	0.858156	-0.672166	26	26	0.627564	contigs_merge_contig_10236	0	2426	0.858156	-0.672166	0.627564	1.25881	1.75677	0.332059	48	48	1.25881	contigs_merge_contig_10236	0	2426	1.75677	0.332059	1.25881
contigs_merge_contig_10237	0.246322	0.246322	0.246322	2.71628	1.44163	1.44163	1.44163	0.485255	0.347801	0.347801	0.347801	2.77218	3.47801e-07	2.77218	0.404225	0.686048	1	3.47801e-07	2.77218	0.404225	0.686048	1	0.143521	0.196256	-2.80067	2	2	0.143521	contigs_merge_contig_10237	0	816	0.196256	-2.80067	0.143521	0.389843	0.544057	-1.35904	5	5	0.389843	contigs_merge_contig_10237	0	816	0.544057	-1.35904	0.389843
contigs_merge_contig_10238	5.89153	5.89153	5.89153	2.60451	1.38101	1.38101	1.38101	1.73595	8.32544	8.32544	8.32544	2.65811	8.32544e-06	2.65811	1.9426	0.0520645	1	8.32544e-06	2.65811	1.9426	0.0520644	1	3.67186	5.02105	1.87651	209	209	3.67186	contigs_merge_contig_10238	0	3333	5.02105	1.87651	3.67186	9.56339	13.3465	3.25752	501	501	9.56339	contigs_merge_contig_10238	0	3333	13.3465	3.25752	9.56339
contigs_merge_contig_10239	0.32233	0.32233	-0.32233	#DIV/0!	#DIV/0!	0	#DIV/0!	0	0.440766	0.440766	-0.440766	#DIV/0!	-4.40766e-07	#DIV/0!	-0.663903	0.506753	1	-4.40766e-07	#DIV/0!	-0.663903	0.506753	1	0.32233	0.440766	-1.63339	0	3	0.32233	contigs_merge_contig_10239	0	545	0.440766	-1.63339	0.32233	0	0	#DIV/0!	0	0	0	contigs_merge_contig_10239	0	545	0	#DIV/0!	0
contigs_merge_contig_1024	0.13324	0.13324	0.13324	#DIV/0!	#DIV/0!	0	#DIV/0!	0	0.185948	0.185948	0.185948	#DIV/0!	1.85948e-07	#DIV/0!	0.431217	0.666311	1	1.85948e-07	#DIV/0!	0.431217	0.666311	1	0	0	#DIV/0!	0	0	0	contigs_merge_contig_1024	0	955	0	#DIV/0!	0	0.13324	0.185948	-2.9079	2	2	0.13324	contigs_merge_contig_1024	0	955	0.185948	-2.9079	0.13324
contigs_merge_contig_10240	0	0	0	1	#NUM!	0	#NUM!	#NUM!	0	0	0	1	0	1	0	1	1	0	1	0	1	1	0	0	#DIV/0!	0	0	0	contigs_merge_contig_10240	0	359	0	#DIV/0!	0	0	0	#DIV/0!	0	0	0	contigs_merge_contig_10240	0	359	0	#DIV/0!	0
contigs_merge_contig_10241	2.02108	2.02108	2.02108	1.42856	0.514562	0.514562	0.514562	1.22997	2.95329	2.95329	2.95329	1.45796	2.95329e-06	1.45796	0.741789	0.458215	1	2.95329e-06	1.45796	0.74179	0.458215	1	4.71596	6.4488	2.23755	108	108	4.71596	contigs_merge_contig_10241	0	1341	6.4488	2.23755	4.71596	6.73704	9.40208	2.75211	142	142	6.73704	contigs_merge_contig_10241	0	1341	9.40208	2.75211	6.73704
contigs_merge_contig_10242	0	0	0	1	#NUM!	0	#NUM!	#NUM!	0	0	0	1	0	1	0	1	1	0	1	0	1	1	0	0	#DIV/0!	0	0	0	contigs_merge_contig_10242	0	733	0	#DIV/0!	0	0	0	#DIV/0!	0	0	0	contigs_merge_contig_10242	0	733	0	#DIV/0!	0
contigs_merge_contig_10243	0.121904	0.121904	-0.121904	-1.00738	0.0106055	0.0106055	-0.0106055	-1.00262	0.298251	0.298251	0.298251	1.0131	2.98251e-07	1.0131	0.0440626	0.964854	1	2.98251e-07	1.0131	0.0440626	0.964854	1	16.644	22.7596	4.05693	220	220	16.644	contigs_merge_contig_10243	0	774	22.7596	4.05693	16.644	16.5221	23.0579	4.04632	201	201	16.5221	contigs_merge_contig_10243	0	774	23.0579	4.04632	16.5221
contigs_merge_contig_10244	0.607528	0.607528	0.607528	2.41447	1.27171	1.27171	1.27171	-0.0430345	0.859942	0.859942	0.859942	2.46416	8.59942e-07	2.46416	0.602879	0.546589	1	8.59942e-07	2.46416	0.602879	0.54659	1	0.42951	0.587329	-1.21924	4	9	0.42951	contigs_merge_contig_10244	0	1227	0.587329	-1.21924	0.42951	1.03704	1.44727	0.0524692	7	20	1.03704	contigs_merge_contig_10244	0	1227	1.44727	0.0524692	1.03704
contigs_merge_contig_10245	0.0702901	0.0702901	-0.0702901	-1.84075	0.880297	0.880297	-0.880297	-0.754127	0.0937648	0.0937648	-0.0937648	-1.80364	-9.37648e-08	-1.80364	-0.163942	0.869777	1	-9.37648e-08	-1.80364	-0.163942	0.869777	1	0.153894	0.21044	-2.69999	2	2	0.153894	contigs_merge_contig_10245	0	761	0.21044	-2.69999	0.153894	0.0836035	0.116676	-3.58029	1	1	0.0836035	contigs_merge_contig_10245	0	761	0.116676	-3.58029	0.0836035
contigs_merge_contig_10246	0	0	0	1	#NUM!	0	#NUM!	#NUM!	0	0	0	1	0	1	0	1	1	0	1	0	1	1	0	0	#DIV/0!	0	0	0	contigs_merge_contig_10246	0	888	0	#DIV/0!	0	0	0	#DIV/0!	0	0	0	contigs_merge_contig_10246	0	888	0	#DIV/0!	0
contigs_merge_contig_10247	0	0	0	1	#NUM!	0	#NUM!	#NUM!	0	0	0	1	0	1	0	1	1	0	1	0	1	1	0	0	#DIV/0!	0	0	0	contigs_merge_contig_10247	0	886	0	#DIV/0!	0	0	0	#DIV/0!	0	0	0	contigs_merge_contig_10247	0	886	0	#DIV/0!	0
contigs_merge_contig_10248	0	0	0	1	#NUM!	0	#NUM!	#NUM!	0	0	0	1	0	1	0	1	1	0	1	0	1	1	0	0	#DIV/0!	0	0	0	contigs_merge_contig_10248	0	733	0	#DIV/0!	0	0	0	#DIV/0!	0	0	0	contigs_merge_contig_10248	0	733	0	#DIV/0!	0
contigs_merge_contig_10249	27.8708	27.8708	27.8708	1.51923	0.603344	0.603344	0.603344	1.105	40.4065	40.4065	40.4065	1.5505	4.04065e-05	1.5505	2.95333	0.00314369	0.316933	4.04065e-05	1.5505	2.95333	0.00314366	0.31693	53.6768	73.3999	5.74623	208	231	53.6768	contigs_merge_contig_10249	0	252	73.3999	5.74623	53.6768	81.5476	113.806	6.34957	296	323	81.5476	contigs_merge_contig_10249	0	252	113.806	6.34957	81.5476
contigs_merge_contig_1025	0.174919	0.174919	0.174919	2.89736	1.53474	1.53474	1.53474	0.553755	0.246709	0.246709	0.246709	2.95699	2.46709e-07	2.95699	0.349304	0.726861	1	2.46709e-07	2.95699	0.349304	0.726861	1	0.0921908	0.126065	-3.43923	6	6	0.0921908	contigs_merge_contig_1025	0	3811	0.126065	-3.43923	0.0921908	0.26711	0.372774	-1.90449	16	16	0.26711	contigs_merge_contig_1025	0	3811	0.372774	-1.90449	0.26711
contigs_merge_contig_10250	5.73016	5.73016	5.73016	2.30884	1.20717	1.20717	1.20717	1.56667	8.12011	8.12011	8.12011	2.35635	8.12011e-06	2.35635	1.81149	0.0700655	1	8.12011e-06	2.35635	1.81149	0.0700654	1	4.37806	5.98673	2.13029	32	32	4.37806	contigs_merge_contig_10250	0	428	5.98673	2.13029	4.37806	10.1082	14.1068	3.33746	68	68	10.1082	contigs_merge_contig_10250	0	428	14.1068	3.33746	10.1082
contigs_merge_contig_10251	0.75068	0.75068	0.75068	1.73842	0.797774	0.797774	0.797774	34.5746	1.07624	1.07624	1.07624	1.77419	1.07624e-06	1.77419	0.548039	0.583665	1	1.07624e-06	1.77419	0.548039	0.583665	1	1.01661	1.39015	0.0237612	5	5	1.01661	contigs_merge_contig_10251	0	288	1.39015	0.0237612	1.01661	1.76729	2.46639	0.821536	8	8	1.76729	contigs_merge_contig_10251	0	288	2.46639	0.821536	1.76729
contigs_merge_contig_10252	0.0241477	0.0241477	0.0241477	2.17302	1.1197	1.1197	1.1197	0.800132	0.0342794	0.0342794	0.0342794	2.21774	3.42794e-08	2.21774	0.113899	0.909318	1	3.42794e-08	2.21774	0.113899	0.909318	1	0.0205859	0.02815	-5.6022	0	2	0.0205859	contigs_merge_contig_10252	0	5689	0.02815	-5.6022	0.0205859	0.0447336	0.0624293	-4.4825	0	4	0.0447336	contigs_merge_contig_10252	0	5689	0.0624293	-4.4825	0.0447336
contigs_merge_contig_10253	0.0267835	0.0267835	0.0267835	3.25953	1.70467	1.70467	1.70467	0.733585	0.0377121	0.0377121	0.0377121	3.32661	3.77121e-08	3.32661	0.142406	0.886759	1	3.77121e-08	3.32661	0.142406	0.886759	1	0.0118535	0.016209	-6.39854	0	1	0.0118535	contigs_merge_contig_10253	0	4940	0.016209	-6.39854	0.0118535	0.038637	0.0539211	-4.69387	0	3	0.038637	contigs_merge_contig_10253	0	4940	0.0539211	-4.69387	0.038637
contigs_merge_contig_10254	0.286587	0.286587	0.286587	#DIV/0!	#DIV/0!	0	#DIV/0!	0	0.399955	0.399955	0.399955	#DIV/0!	3.99955e-07	#DIV/0!	0.63242	0.527112	1	3.99955e-07	#DIV/0!	0.63242	0.527112	1	0	0	#DIV/0!	0	0	0	contigs_merge_contig_10254	0	222	0	#DIV/0!	0	0.286587	0.399955	-1.80296	1	1	0.286587	contigs_merge_contig_10254	0	222	0.399955	-1.80296	0.286587
contigs_merge_contig_10255	0	0	0	1	#NUM!	0	#NUM!	#NUM!	0	0	0	1	0	1	0	1	1	0	1	0	1	1	0	0	#DIV/0!	0	0	0	contigs_merge_contig_10255	0	292	0	#DIV/0!	0	0	0	#DIV/0!	0	0	0	contigs_merge_contig_10255	0	292	0	#DIV/0!	0
contigs_merge_contig_10256	1.2475	1.2475	1.2475	#DIV/0!	#DIV/0!	0	#DIV/0!	0	1.74098	1.74098	1.74098	#DIV/0!	1.74098e-06	#DIV/0!	1.31946	0.187014	1	1.74098e-06	#DIV/0!	1.31946	0.187014	1	0	0	#DIV/0!	0	0	0	contigs_merge_contig_10256	0	204	0	#DIV/0!	0	1.2475	1.74098	0.319035	4	4	1.2475	contigs_merge_contig_10256	0	204	1.74098	0.319035	1.2475
contigs_merge_contig_10257	0.222137	0.222137	0.222137	22.8167	4.51202	4.51202	4.51202	0.318203	0.310297	0.310297	0.310297	23.2863	3.10297e-07	23.2863	0.533614	0.593609	1	3.10297e-07	23.2863	0.533614	0.593609	1	0.010182	0.0139232	-6.61784	1	1	0.010182	contigs_merge_contig_10257	0	5751	0.0139232	-6.61784	0.010182	0.232319	0.324221	-2.10582	21	21	0.232319	contigs_merge_contig_10257	0	5751	0.324221	-2.10582	0.232319
contigs_merge_contig_10258	2.32315	2.32315	2.32315	2.12867	1.08996	1.08996	1.08996	2.04657	3.30007	3.30007	3.30007	2.17248	3.30007e-06	2.17248	1.10437	0.269431	1	3.30007e-06	2.17248	1.10437	0.269431	1	2.0583	2.8146	1.04145	24	49	2.0583	contigs_merge_contig_10258	0	1394	2.8146	1.04145	2.0583	4.38145	6.11467	2.13141	50	96	4.38145	contigs_merge_contig_10258	0	1394	6.11467	2.13141	4.38145
contigs_merge_contig_10259	0.0333346	0.0333346	0.0333346	1.44868	0.53474	0.53474	0.53474	0.857425	0.0486118	0.0486118	0.0486118	1.47849	4.86118e-08	1.47849	0.0968758	0.922825	1	4.86118e-08	1.47849	0.0968758	0.922825	1	0.0742946	0.101593	-3.7506	6	6	0.0742946	contigs_merge_contig_10259	0	4729	0.101593	-3.7506	0.0742946	0.107629	0.150205	-3.21586	8	8	0.107629	contigs_merge_contig_10259	0	4729	0.150205	-3.21586	0.107629
contigs_merge_contig_1026	0.201093	0.201093	-0.201093	-1.84075	0.880297	0.880297	-0.880297	-0.573462	0.268252	0.268252	-0.268252	-1.80364	-2.68252e-07	-1.80364	-0.277294	0.781554	1	-2.68252e-07	-1.80364	-0.277294	0.781554	1	0.440275	0.602049	-1.18352	2	2	0.440275	contigs_merge_contig_1026	0	266	0.602049	-1.18352	0.440275	0.239182	0.333797	-2.06382	1	1	0.239182	contigs_merge_contig_1026	0	266	0.333797	-2.06382	0.239182
contigs_merge_contig_10260	2.43585	2.43585	2.43585	1.65027	0.722699	0.722699	0.722699	1.37931	3.50484	3.50484	3.50484	1.68423	3.50484e-06	1.68423	0.945205	0.344554	1	3.50484e-06	1.68423	0.945205	0.344554	1	3.74592	5.12232	1.90532	106	106	3.74592	contigs_merge_contig_10260	0	1657	5.12232	1.90532	3.74592	6.18177	8.62716	2.62802	161	161	6.18177	contigs_merge_contig_10260	0	1657	8.62716	2.62802	6.18177
contigs_merge_contig_10261	0.0105979	0.0105979	0.0105979	1.08651	0.119703	0.119703	0.119703	0.960483	0.0182375	0.0182375	0.0182375	1.10887	1.82375e-08	1.10887	0.0306841	0.975521	1	1.82375e-08	1.10887	0.0306841	0.975521	1	0.122503	0.167516	-3.02911	4	4	0.122503	contigs_merge_contig_10261	0	1912	0.167516	-3.02911	0.122503	0.133101	0.185753	-2.90941	4	4	0.133101	contigs_merge_contig_10261	0	1912	0.185753	-2.90941	0.133101
contigs_merge_contig_10262	0.367854	0.367854	0.367854	1.6026	0.680417	0.680417	0.680417	0.0444606	0.530548	0.530548	0.530548	1.63558	5.30548e-07	1.63558	0.357693	0.720573	1	5.30548e-07	1.63558	0.357693	0.720573	1	0.610441	0.834741	-0.712077	37	40	0.610441	contigs_merge_contig_10262	0	3837	0.834741	-0.712077	0.610441	0.978294	1.36529	-0.0316593	51	59	0.978294	contigs_merge_contig_10262	0	3837	1.36529	-0.0316593	0.978294
contigs_merge_contig_10263	0.0776118	0.0776118	0.0776118	#DIV/0!	#DIV/0!	0	#DIV/0!	0	0.108314	0.108314	0.108314	#DIV/0!	1.08314e-07	#DIV/0!	0.32911	0.742072	1	1.08314e-07	#DIV/0!	0.32911	0.742072	1	0	0	#DIV/0!	0	0	0	contigs_merge_contig_10263	0	3279	0	#DIV/0!	0	0.0776118	0.108314	-3.68758	0	4	0.0776118	contigs_merge_contig_10263	0	3279	0.108314	-3.68758	0.0776118
contigs_merge_contig_10264	0	0	0	1	#NUM!	0	#NUM!	#NUM!	0	0	0	1	0	1	0	1	1	0	1	0	1	1	0	0	#DIV/0!	0	0	0	contigs_merge_contig_10264	0	575	0	#DIV/0!	0	0	0	#DIV/0!	0	0	0	contigs_merge_contig_10264	0	575	0	#DIV/0!	0
contigs_merge_contig_10265	1.36328	1.36328	-1.36328	-6.44264	2.68765	2.68765	-2.68765	0.345694	1.85716	1.85716	-1.85716	-6.31273	-1.85716e-06	-6.31273	-1.16157	0.245412	1	-1.85716e-06	-6.31273	-1.16157	0.245412	1	1.61376	2.20672	0.690428	7	7	1.61376	contigs_merge_contig_10265	0	254	2.20672	0.690428	1.61376	0.250482	0.349567	-1.99722	1	1	0.250482	contigs_merge_contig_10265	0	254	0.349567	-1.99722	0.250482
contigs_merge_contig_10266	0.0248881	0.0248881	-0.0248881	-1.05186	0.0729426	0.0729426	-0.0729426	-0.931132	0.0205278	0.0205278	-0.0205278	-1.03065	-2.05278e-08	-1.03065	-0.0176022	0.985956	1	-2.05278e-08	-1.03065	-0.0176022	0.985956	1	0.504798	0.690281	-0.986223	7	8	0.504798	contigs_merge_contig_10266	0	928	0.690281	-0.986223	0.504798	0.47991	0.669753	-1.05917	5	7	0.47991	contigs_merge_contig_10266	0	928	0.669753	-1.05917	0.47991
contigs_merge_contig_10267	0.47912	0.47912	0.47912	1.5044	0.589188	0.589188	0.589188	-6.94259	0.695381	0.695381	0.695381	1.53536	6.95381e-07	1.53536	0.38319	0.701579	1	6.95381e-07	1.53536	0.38319	0.701579	1	0.949881	1.29891	-0.0741809	65	65	0.949881	contigs_merge_contig_10267	0	4007	1.29891	-0.0741809	0.949881	1.429	1.99429	0.515007	89	90	1.429	contigs_merge_contig_10267	0	4007	1.99429	0.515007	1.429
contigs_merge_contig_10268	0.156705	0.156705	0.156705	#DIV/0!	#DIV/0!	0	#DIV/0!	0	0.218695	0.218695	0.218695	#DIV/0!	2.18695e-07	#DIV/0!	0.467648	0.640036	1	2.18695e-07	#DIV/0!	0.467648	0.640036	1	0	0	#DIV/0!	0	0	0	contigs_merge_contig_10268	0	812	0	#DIV/0!	0	0.156705	0.218695	-2.67388	2	2	0.156705	contigs_merge_contig_10268	0	812	0.218695	-2.67388	0.156705
contigs_merge_contig_10269	0	0	0	1	#NUM!	0	#NUM!	#NUM!	0	0	0	1	0	1	0	1	1	0	1	0	1	1	0	0	#DIV/0!	0	0	0	contigs_merge_contig_10269	0	226	0	#DIV/0!	0	0	0	#DIV/0!	0	0	0	contigs_merge_contig_10269	0	226	0	#DIV/0!	0
contigs_merge_contig_1027	0.0914662	0.0914662	0.0914662	2.60763	1.38274	1.38274	1.38274	0.665646	0.12925	0.12925	0.12925	2.66129	1.2925e-07	2.66129	0.24217	0.808648	1	1.2925e-07	2.66129	0.24217	0.808649	1	0.0568952	0.0778008	-4.13555	1	5	0.0568952	contigs_merge_contig_1027	0	5146	0.0778008	-4.13555	0.0568952	0.148361	0.20705	-2.75281	4	12	0.148361	contigs_merge_contig_1027	0	5146	0.20705	-2.75281	0.148361
contigs_merge_contig_10270	0.0816194	0.0816194	0.0816194	#DIV/0!	#DIV/0!	0	#DIV/0!	0	0.113906	0.113906	0.113906	#DIV/0!	1.13906e-07	#DIV/0!	0.3375	0.73574	1	1.13906e-07	#DIV/0!	0.3375	0.73574	1	0	0	#DIV/0!	0	0	0	contigs_merge_contig_10270	0	1559	0	#DIV/0!	0	0.0816194	0.113906	-3.61494	2	2	0.0816194	contigs_merge_contig_10270	0	1559	0.113906	-3.61494	0.0816194
contigs_merge_contig_10271	0	0	0	1	#NUM!	0	#NUM!	#NUM!	0	0	0	1	0	1	0	1	1	0	1	0	1	1	0	0	#DIV/0!	0	0	0	contigs_merge_contig_10271	0	434	0	#DIV/0!	0	0	0	#DIV/0!	0	0	0	contigs_merge_contig_10271	0	434	0	#DIV/0!	0
contigs_merge_contig_10272	0.571775	0.571775	0.571775	1.28406	0.360711	0.360711	0.360711	1.3574	0.854603	0.854603	0.854603	1.31048	8.54603e-07	1.31048	0.338884	0.734697	1	8.54603e-07	1.31048	0.338884	0.734697	1	2.01288	2.75249	1.00926	8	11	2.01288	contigs_merge_contig_10272	0	320	2.75249	1.00926	2.01288	2.58466	3.6071	1.36997	11	13	2.58466	contigs_merge_contig_10272	0	320	3.6071	1.36997	2.58466
contigs_merge_contig_10273	0	0	0	1	#NUM!	0	#NUM!	#NUM!	0	0	0	1	0	1	0	1	1	0	1	0	1	1	0	0	#DIV/0!	0	0	0	contigs_merge_contig_10273	0	287	0	#DIV/0!	0	0	0	#DIV/0!	0	0	0	contigs_merge_contig_10273	0	287	0	#DIV/0!	0
contigs_merge_contig_10274	0.321236	0.321236	0.321236	2.35411	1.23518	1.23518	1.23518	0.404915	0.454987	0.454987	0.454987	2.40255	4.54987e-07	2.40255	0.433069	0.664965	1	4.54987e-07	2.40255	0.433069	0.664965	1	0.237231	0.324399	-2.07564	12	12	0.237231	contigs_merge_contig_10274	0	2962	0.324399	-2.07564	0.237231	0.558467	0.779386	-0.840456	26	26	0.558467	contigs_merge_contig_10274	0	2962	0.779386	-0.840456	0.558467
contigs_merge_contig_10275	0.155755	0.155755	0.155755	2.17302	1.1197	1.1197	1.1197	0.615603	0.221106	0.221106	0.221106	2.21774	2.21106e-07	2.21774	0.289269	0.772375	1	2.21106e-07	2.21774	0.289269	0.772376	1	0.132781	0.18157	-2.91288	1	1	0.132781	contigs_merge_contig_10275	0	441	0.18157	-2.91288	0.132781	0.288537	0.402676	-1.79317	2	2	0.288537	contigs_merge_contig_10275	0	441	0.402676	-1.79317	0.288537
contigs_merge_contig_10276	5.00799	5.00799	5.00799	1.48228	0.567822	0.567822	0.567822	1.16818	7.28126	7.28126	7.28126	1.51279	7.28126e-06	1.51279	1.21899	0.22285	1	7.28126e-06	1.51279	1.21899	0.22285	1	10.3839	14.1993	3.37627	291	291	10.3839	contigs_merge_contig_10276	0	1641	14.1993	3.37627	10.3839	15.3919	21.4806	3.9441	397	397	15.3919	contigs_merge_contig_10276	0	1641	21.4806	3.9441	15.3919
contigs_merge_contig_10277	0	0	0	1	#NUM!	0	#NUM!	#NUM!	0	0	0	1	0	1	0	1	1	0	1	0	1	1	0	0	#DIV/0!	0	0	0	contigs_merge_contig_10277	0	1803	0	#DIV/0!	0	0	0	#DIV/0!	0	0	0	contigs_merge_contig_10277	0	1803	0	#DIV/0!	0
contigs_merge_contig_10278	0	0	0	1	#NUM!	0	#NUM!	#NUM!	0	0	0	1	0	1	0	1	1	0	1	0	1	1	0	0	#DIV/0!	0	0	0	contigs_merge_contig_10278	0	311	0	#DIV/0!	0	0	0	#DIV/0!	0	0	0	contigs_merge_contig_10278	0	311	0	#DIV/0!	0
contigs_merge_contig_10279	0	0	0	1	#NUM!	0	#NUM!	#NUM!	0	0	0	1	0	1	0	1	1	0	1	0	1	1	0	0	#DIV/0!	0	0	0	contigs_merge_contig_10279	0	2298	0	#DIV/0!	0	0	0	#DIV/0!	0	0	0	contigs_merge_contig_10279	0	2298	0	#DIV/0!	0
contigs_merge_contig_1028	0.00192395	0.00192395	0.00192395	1.08651	0.119703	0.119703	0.119703	0.978199	0.00331088	0.00331088	0.00331088	1.10887	3.31088e-09	1.10887	0.0130738	0.989569	1	3.31088e-09	1.10887	0.0130738	0.989569	1	0.0222395	0.0304112	-5.49073	1	1	0.0222395	contigs_merge_contig_1028	0	2633	0.0304112	-5.49073	0.0222395	0.0241634	0.033722	-5.37103	1	1	0.0241634	contigs_merge_contig_1028	0	2633	0.033722	-5.37103	0.0241634
contigs_merge_contig_10280	0.103989	0.103989	0.103989	1.08651	0.119703	0.119703	0.119703	1.45088	0.178952	0.178952	0.178952	1.10887	1.78952e-07	1.10887	0.0961168	0.923428	1	1.78952e-07	1.10887	0.0961168	0.923428	1	1.20204	1.64372	0.265485	5	7	1.20204	contigs_merge_contig_10280	0	341	1.64372	0.265485	1.20204	1.30603	1.82267	0.385188	4	7	1.30603	contigs_merge_contig_10280	0	341	1.82267	0.385188	1.30603
contigs_merge_contig_10281	0.112258	0.112258	-0.112258	-1.84075	0.880297	0.880297	-0.880297	-0.696958	0.149748	0.149748	-0.149748	-1.80364	-1.49748e-07	-1.80364	-0.207181	0.835868	1	-1.49748e-07	-1.80364	-0.207181	0.835868	1	0.245778	0.336086	-2.02457	4	4	0.245778	contigs_merge_contig_10281	0	953	0.336086	-2.02457	0.245778	0.13352	0.186338	-2.90487	2	2	0.13352	contigs_merge_contig_10281	0	953	0.186338	-2.90487	0.13352
contigs_merge_contig_10282	0.00413364	0.00413364	0.00413364	1.08651	0.119703	0.119703	0.119703	0.972717	0.00711345	0.00711345	0.00711345	1.10887	7.11345e-09	1.10887	0.0191633	0.984711	1	7.11345e-09	1.10887	0.0191633	0.984711	1	0.0477817	0.0653387	-4.3874	2	2	0.0477817	contigs_merge_contig_10282	0	2451	0.0653387	-4.3874	0.0477817	0.0519154	0.0724521	-4.26769	2	2	0.0519154	contigs_merge_contig_10282	0	2451	0.0724521	-4.26769	0.0519154
contigs_merge_contig_10283	0.449417	0.449417	0.449417	2.48345	1.31235	1.31235	1.31235	0.238262	0.635723	0.635723	0.635723	2.53456	6.35723e-07	2.53456	0.525362	0.599332	1	6.35723e-07	2.53456	0.525362	0.599332	1	0.302953	0.414271	-1.72283	11	14	0.302953	contigs_merge_contig_10283	0	2706	0.414271	-1.72283	0.302953	0.75237	1.04999	-0.410485	32	32	0.75237	contigs_merge_contig_10283	0	2706	1.04999	-0.410485	0.75237
contigs_merge_contig_10284	0.12032	0.12032	0.12032	1.58798	0.66719	0.66719	0.66719	0.708509	0.173674	0.173674	0.173674	1.62066	1.73674e-07	1.62066	0.20281	0.839284	1	1.73674e-07	1.62066	0.20281	0.839284	1	0.204633	0.279823	-2.28889	13	13	0.204633	contigs_merge_contig_10284	0	3720	0.279823	-2.28889	0.204633	0.324953	0.453498	-1.6217	19	19	0.324953	contigs_merge_contig_10284	0	3720	0.453498	-1.6217	0.324953
contigs_merge_contig_10285	0.319399	0.319399	-0.319399	#DIV/0!	#DIV/0!	0	#DIV/0!	0	0.436759	0.436759	-0.436759	#DIV/0!	-4.36759e-07	#DIV/0!	-0.660878	0.508691	1	-4.36759e-07	#DIV/0!	-0.660878	0.508691	1	0.319399	0.436759	-1.64657	3	3	0.319399	contigs_merge_contig_10285	0	550	0.436759	-1.64657	0.319399	0	0	#DIV/0!	0	0	0	contigs_merge_contig_10285	0	550	0	#DIV/0!	0
contigs_merge_contig_10286	0.006307	0.006307	0.006307	1.02615	0.0372404	0.0372404	0.0372404	0.981849	0.0155894	0.0155894	0.0155894	1.04727	1.55894e-08	1.04727	0.0189716	0.984864	1	1.55894e-08	1.04727	0.0189716	0.984864	1	0.241194	0.329818	-2.05173	18	18	0.241194	contigs_merge_contig_10286	0	4370	0.329818	-2.05173	0.241194	0.247501	0.345408	-2.01449	17	17	0.247501	contigs_merge_contig_10286	0	4370	0.345408	-2.01449	0.247501
contigs_merge_contig_10287	0.00183687	0.00183687	0.00183687	1.0186	0.0265931	0.0265931	0.0265931	0.992039	0.00534203	0.00534203	0.00534203	1.03957	5.34203e-09	1.03957	0.0101799	0.991878	1	5.34203e-09	1.03957	0.0101799	0.991878	1	0.0987358	0.135015	-3.34028	12	16	0.0987358	contigs_merge_contig_10287	0	9489	0.135015	-3.34028	0.0987358	0.100573	0.140357	-3.31369	14	15	0.100573	contigs_merge_contig_10287	0	9489	0.140357	-3.31369	0.100573
contigs_merge_contig_10288	0.0159301	0.0159301	0.0159301	1.08651	0.119703	0.119703	0.119703	0.950964	0.0274136	0.0274136	0.0274136	1.10887	2.74136e-08	1.10887	0.0376195	0.969991	1	2.74136e-08	1.10887	0.0376195	0.969991	1	0.18414	0.251801	-2.44112	3	3	0.18414	contigs_merge_contig_10288	0	954	0.251801	-2.44112	0.18414	0.20007	0.279214	-2.32142	3	3	0.20007	contigs_merge_contig_10288	0	954	0.279214	-2.32142	0.20007
contigs_merge_contig_10289	0	0	0	1	#NUM!	0	#NUM!	#NUM!	0	0	0	1	0	1	0	1	1	0	1	0	1	1	0	0	#DIV/0!	0	0	0	contigs_merge_contig_10289	0	1615	0	#DIV/0!	0	0	0	#DIV/0!	0	0	0	contigs_merge_contig_10289	0	1615	0	#DIV/0!	0
contigs_merge_contig_1029	0.236955	0.236955	0.236955	#DIV/0!	#DIV/0!	0	#DIV/0!	0	0.330689	0.330689	0.330689	#DIV/0!	3.30689e-07	#DIV/0!	0.575056	0.565253	1	3.30689e-07	#DIV/0!	0.575056	0.565253	1	0	0	#DIV/0!	0	0	0	contigs_merge_contig_1029	0	537	0	#DIV/0!	0	0.236955	0.330689	-2.07732	2	2	0.236955	contigs_merge_contig_1029	0	537	0.330689	-2.07732	0.236955
contigs_merge_contig_10290	0.217141	0.217141	0.217141	#DIV/0!	#DIV/0!	0	#DIV/0!	0	0.303038	0.303038	0.303038	#DIV/0!	3.03038e-07	#DIV/0!	0.550489	0.581984	1	3.03038e-07	#DIV/0!	0.550489	0.581984	1	0	0	#DIV/0!	0	0	0	contigs_merge_contig_10290	0	293	0	#DIV/0!	0	0.217141	0.303038	-2.2033	1	1	0.217141	contigs_merge_contig_10290	0	293	0.303038	-2.2033	0.217141
contigs_merge_contig_10291	0.169149	0.169149	0.169149	2.89736	1.53474	1.53474	1.53474	0.559947	0.23857	0.23857	0.23857	2.95699	2.3857e-07	2.95699	0.343495	0.731226	1	2.3857e-07	2.95699	0.343495	0.731226	1	0.0891498	0.121907	-3.48763	6	6	0.0891498	contigs_merge_contig_10291	0	3941	0.121907	-3.48763	0.0891498	0.258299	0.360477	-1.95289	16	16	0.258299	contigs_merge_contig_10291	0	3941	0.360477	-1.95289	0.258299
contigs_merge_contig_10292	0.149761	0.149761	-0.149761	#DIV/0!	#DIV/0!	0	#DIV/0!	0	0.204789	0.204789	-0.204789	#DIV/0!	-2.04789e-07	#DIV/0!	-0.452536	0.650883	1	-2.04789e-07	#DIV/0!	-0.452536	0.650883	1	0.149761	0.204789	-2.73927	2	2	0.149761	contigs_merge_contig_10292	0	782	0.204789	-2.73927	0.149761	0	0	#DIV/0!	0	0	0	contigs_merge_contig_10292	0	782	0	#DIV/0!	0
contigs_merge_contig_10293	0.21494	0.21494	0.21494	#DIV/0!	#DIV/0!	0	#DIV/0!	0	0.299967	0.299967	0.299967	#DIV/0!	2.99967e-07	#DIV/0!	0.547692	0.583903	1	2.99967e-07	#DIV/0!	0.547692	0.583903	1	0	0	#DIV/0!	0	0	0	contigs_merge_contig_10293	0	592	0	#DIV/0!	0	0.21494	0.299967	-2.21799	2	2	0.21494	contigs_merge_contig_10293	0	592	0.299967	-2.21799	0.21494
contigs_merge_contig_10294	0.794657	0.794657	0.794657	3.25953	1.70467	1.70467	1.70467	-0.130699	1.11891	1.11891	1.11891	3.32661	1.11891e-06	3.32661	0.775684	0.437936	1	1.11891e-06	3.32661	0.775684	0.437936	1	0.351691	0.480916	-1.50762	2	2	0.351691	contigs_merge_contig_10294	0	333	0.480916	-1.50762	0.351691	1.14635	1.59982	0.197045	6	6	1.14635	contigs_merge_contig_10294	0	333	1.59982	0.197045	1.14635
contigs_merge_contig_10295	0.102812	0.102812	0.102812	1.22232	0.289628	0.289628	0.289628	0.739698	0.156496	0.156496	0.156496	1.24748	1.56496e-07	1.24748	0.131272	0.89556	1	1.56496e-07	1.24748	0.131272	0.89556	1	0.462441	0.63236	-1.11266	8	8	0.462441	contigs_merge_contig_10295	0	1013	0.63236	-1.11266	0.462441	0.565252	0.788856	-0.823033	9	9	0.565252	contigs_merge_contig_10295	0	1013	0.788856	-0.823033	0.565252
contigs_merge_contig_10296	0	0	0	1	#NUM!	0	#NUM!	#NUM!	0	0	0	1	0	1	0	1	1	0	1	0	1	1	0	0	#DIV/0!	0	0	0	contigs_merge_contig_10296	0	712	0	#DIV/0!	0	0	0	#DIV/0!	0	0	0	contigs_merge_contig_10296	0	712	0	#DIV/0!	0
contigs_merge_contig_10297	0.396749	0.396749	0.396749	10.8651	3.44163	3.44163	3.44163	0.257635	0.554827	0.554827	0.554827	11.0887	5.54827e-07	11.0887	0.680467	0.496209	1	5.54827e-07	11.0887	0.680467	0.496209	1	0.0402174	0.0549949	-4.63604	1	1	0.0402174	contigs_merge_contig_10297	0	1456	0.0549949	-4.63604	0.0402174	0.436966	0.609822	-1.19441	10	10	0.436966	contigs_merge_contig_10297	0	1456	0.609822	-1.19441	0.436966
contigs_merge_contig_10298	0.090244	0.090244	-0.090244	-1.25506	0.327756	0.327756	-0.327756	-0.78134	0.113447	0.113447	-0.113447	-1.22975	-1.13447e-07	-1.22975	-0.108118	0.913902	1	-1.13447e-07	-1.22975	-0.108118	0.913902	1	0.444059	0.607224	-1.17118	13	15	0.444059	contigs_merge_contig_10298	0	1978	0.607224	-1.17118	0.444059	0.353815	0.493777	-1.49893	11	11	0.353815	contigs_merge_contig_10298	0	1978	0.493777	-1.49893	0.353815
contigs_merge_contig_10299	0.0648259	0.0648259	-0.0648259	-1.38057	0.46526	0.46526	-0.46526	-0.817795	0.0838521	0.0838521	-0.0838521	-1.35273	-8.38521e-08	-1.35273	-0.112122	0.910727	1	-8.38521e-08	-1.35273	-0.112122	0.910727	1	0.235167	0.321577	-2.08824	6	6	0.235167	contigs_merge_contig_10299	0	1494	0.321577	-2.08824	0.235167	0.170341	0.237725	-2.5535	4	4	0.170341	contigs_merge_contig_10299	0	1494	0.237725	-2.5535	0.170341
contigs_merge_contig_103	1.04268	1.04268	1.04268	1.62322	0.698859	0.698859	0.698859	1.94126	1.50222	1.50222	1.50222	1.65663	1.50222e-06	1.65663	0.609342	0.542298	1	1.50222e-06	1.65663	0.609342	0.542298	1	1.67304	2.28779	0.742475	26	83	1.67304	contigs_merge_contig_103	0	2905	2.28779	0.742475	1.67304	2.71572	3.79001	1.44133	31	124	2.71572	contigs_merge_contig_103	0	2905	3.79001	1.44133	2.71572
contigs_merge_contig_1030	0.172541	0.172541	0.172541	1.53922	0.622203	0.622203	0.622203	0.621518	0.2498	0.2498	0.2498	1.5709	2.498e-07	1.5709	0.235523	0.813803	1	2.498e-07	1.5709	0.235523	0.813803	1	0.319981	0.437555	-1.64394	12	12	0.319981	contigs_merge_contig_1030	0	2196	0.437555	-1.64394	0.319981	0.492522	0.687355	-1.02174	16	17	0.492522	contigs_merge_contig_1030	0	2196	0.687355	-1.02174	0.492522
contigs_merge_contig_10300	0	0	0	1	#NUM!	0	#NUM!	#NUM!	0	0	0	1	0	1	0	1	1	0	1	0	1	1	0	0	#DIV/0!	0	0	0	contigs_merge_contig_10300	0	312	0	#DIV/0!	0	0	0	#DIV/0!	0	0	0	contigs_merge_contig_10300	0	312	0	#DIV/0!	0
contigs_merge_contig_10301	0.0677346	0.0677346	-0.0677346	#DIV/0!	#DIV/0!	0	#DIV/0!	0	0.092623	0.092623	-0.092623	#DIV/0!	-9.2623e-08	#DIV/0!	-0.30434	0.760869	1	-9.2623e-08	#DIV/0!	-0.30434	0.760869	1	0.0677346	0.092623	-3.88396	2	2	0.0677346	contigs_merge_contig_10301	0	1729	0.092623	-3.88396	0.0677346	0	0	#DIV/0!	0	0	0	contigs_merge_contig_10301	0	1729	0	#DIV/0!	0
contigs_merge_contig_10302	0	0	0	1	#NUM!	0	#NUM!	#NUM!	0	0	0	1	0	1	0	1	1	0	1	0	1	1	0	0	#DIV/0!	0	0	0	contigs_merge_contig_10302	0	396	0	#DIV/0!	0	0	0	#DIV/0!	0	0	0	contigs_merge_contig_10302	0	396	0	#DIV/0!	0
contigs_merge_contig_10303	0.236955	0.236955	0.236955	#DIV/0!	#DIV/0!	0	#DIV/0!	0	0.330689	0.330689	0.330689	#DIV/0!	3.30689e-07	#DIV/0!	0.575056	0.565253	1	3.30689e-07	#DIV/0!	0.575056	0.565253	1	0	0	#DIV/0!	0	0	0	contigs_merge_contig_10303	0	537	0	#DIV/0!	0	0.236955	0.330689	-2.07732	2	2	0.236955	contigs_merge_contig_10303	0	537	0.330689	-2.07732	0.236955
contigs_merge_contig_10304	0.667054	0.667054	0.667054	3.6217	1.85667	1.85667	1.85667	0.0597376	0.938089	0.938089	0.938089	3.69623	9.38089e-07	3.69623	0.733882	0.463021	1	9.38089e-07	3.69623	0.733882	0.463021	1	0.254436	0.347926	-1.97463	8	21	0.254436	contigs_merge_contig_10304	0	4833	0.347926	-1.97463	0.254436	0.92149	1.28601	-0.11796	28	70	0.92149	contigs_merge_contig_10304	0	4833	1.28601	-0.11796	0.92149
contigs_merge_contig_10305	1.40664	1.40664	1.40664	2.06954	1.04931	1.04931	1.04931	3.65479	2.00009	2.00009	2.00009	2.11213	2.00009e-06	2.11213	0.845424	0.397874	1	2.00009e-06	2.11213	0.845424	0.397874	1	1.31517	1.79842	0.395253	19	21	1.31517	contigs_merge_contig_10305	0	935	1.79842	0.395253	1.31517	2.72181	3.79851	1.44457	37	40	2.72181	contigs_merge_contig_10305	0	935	3.79851	1.44457	2.72181
contigs_merge_contig_10306	0.126394	0.126394	0.126394	1.22232	0.289628	0.289628	0.289628	0.644516	0.192391	0.192391	0.192391	1.24748	1.92391e-07	1.24748	0.145551	0.884276	1	1.92391e-07	1.24748	0.145551	0.884276	1	0.56851	0.777404	-0.814742	8	8	0.56851	contigs_merge_contig_10306	0	824	0.777404	-0.814742	0.56851	0.694904	0.969795	-0.525115	9	9	0.694904	contigs_merge_contig_10306	0	824	0.969795	-0.525115	0.694904
contigs_merge_contig_10307	0.399573	0.399573	0.399573	3.44062	1.78267	1.78267	1.78267	0.317172	0.562244	0.562244	0.562244	3.51142	5.62244e-07	3.51142	0.559456	0.575851	1	5.62244e-07	3.51142	0.559456	0.575851	1	0.163718	0.223875	-2.61071	2	6	0.163718	contigs_merge_contig_10307	0	2146	0.223875	-2.61071	0.163718	0.563292	0.786119	-0.828046	6	19	0.563292	contigs_merge_contig_10307	0	2146	0.786119	-0.828046	0.563292
contigs_merge_contig_10308	0.39432	0.39432	-0.39432	#DIV/0!	#DIV/0!	0	#DIV/0!	0	0.539209	0.539209	-0.539209	#DIV/0!	-5.39209e-07	#DIV/0!	-0.734309	0.462761	1	-5.39209e-07	#DIV/0!	-0.734309	0.462761	1	0.39432	0.539209	-1.34256	2	2	0.39432	contigs_merge_contig_10308	0	297	0.539209	-1.34256	0.39432	0	0	#DIV/0!	0	0	0	contigs_merge_contig_10308	0	297	0	#DIV/0!	0
contigs_merge_contig_10309	0	0	0	1	#NUM!	0	#NUM!	#NUM!	0	0	0	1	0	1	0	1	1	0	1	0	1	1	0	0	#DIV/0!	0	0	0	contigs_merge_contig_10309	0	806	0	#DIV/0!	0	0	0	#DIV/0!	0	0	0	contigs_merge_contig_10309	0	806	0	#DIV/0!	0
contigs_merge_contig_1031	2.81685	2.81685	2.81685	1.85386	0.890532	0.890532	0.890532	1.51715	4.02397	4.02397	4.02397	1.89201	4.02397e-06	1.89201	1.11407	0.265247	1	4.02397e-06	1.89201	1.11407	0.265247	1	3.29896	4.51113	1.72201	139	160	3.29896	contigs_merge_contig_1031	0	2840	4.51113	1.72201	3.29896	6.11581	8.53511	2.61254	227	273	6.11581	contigs_merge_contig_1031	0	2840	8.53511	2.61254	6.11581
contigs_merge_contig_10310	0.460227	0.460227	0.460227	1.95572	0.967699	0.967699	0.967699	0.0820892	0.655836	0.655836	0.655836	1.99597	6.55836e-07	1.99597	0.46693	0.64055	1	6.55836e-07	1.99597	0.46693	0.64055	1	0.48155	0.658492	-1.05424	5	5	0.48155	contigs_merge_contig_10310	0	608	0.658492	-1.05424	0.48155	0.941777	1.31433	-0.0865419	9	9	0.941777	contigs_merge_contig_10310	0	608	1.31433	-0.0865419	0.941777
contigs_merge_contig_10311	0.0677646	0.0677646	0.0677646	3.25953	1.70467	1.70467	1.70467	0.663066	0.095415	0.095415	0.095415	3.32661	9.5415e-08	3.32661	0.226515	0.820801	1	9.5415e-08	3.32661	0.226515	0.820801	1	0.0299905	0.0410103	-5.05935	2	2	0.0299905	contigs_merge_contig_10311	0	3905	0.0410103	-5.05935	0.0299905	0.0977551	0.136425	-3.35468	6	6	0.0977551	contigs_merge_contig_10311	0	3905	0.136425	-3.35468	0.0977551
contigs_merge_contig_10312	0.758485	0.758485	0.758485	2.71628	1.44163	1.44163	1.44163	-0.223701	1.07096	1.07096	1.07096	2.77218	1.07096e-06	2.77218	0.709325	0.478123	1	1.07096e-06	2.77218	0.709325	0.478123	1	0.441936	0.604321	-1.17809	0	2	0.441936	contigs_merge_contig_10312	0	265	0.604321	-1.17809	0.441936	1.20042	1.67529	0.26354	0	5	1.20042	contigs_merge_contig_10312	0	265	1.67529	0.26354	1.20042
contigs_merge_contig_10313	0.412365	0.412365	0.412365	2.53519	1.34209	1.34209	1.34209	0.292303	0.583047	0.583047	0.583047	2.58736	5.83047e-07	2.58736	0.507929	0.611503	1	5.83047e-07	2.58736	0.507929	0.611503	1	0.268608	0.367305	-1.89643	3	3	0.268608	contigs_merge_contig_10313	0	654	0.367305	-1.89643	0.268608	0.680973	0.950353	-0.554331	7	7	0.680973	contigs_merge_contig_10313	0	654	0.950353	-0.554331	0.680973
contigs_merge_contig_10314	0	0	0	1	#NUM!	0	#NUM!	#NUM!	0	0	0	1	0	1	0	1	1	0	1	0	1	1	0	0	#DIV/0!	0	0	0	contigs_merge_contig_10314	0	493	0	#DIV/0!	0	0	0	#DIV/0!	0	0	0	contigs_merge_contig_10314	0	493	0	#DIV/0!	0
contigs_merge_contig_10315	0.129046	0.129046	0.129046	1.01653	0.0236558	0.0236558	0.0236558	1.00798	0.399757	0.399757	0.399757	1.03745	3.99757e-07	1.03745	0.085722	0.931687	1	3.99757e-07	1.03745	0.085722	0.931687	1	7.80577	10.6739	2.96454	187	295	7.80577	contigs_merge_contig_10315	0	2213	10.6739	2.96454	7.80577	7.93482	11.0737	2.9882	183	276	7.93482	contigs_merge_contig_10315	0	2213	11.0737	2.9882	7.93482
contigs_merge_contig_10316	0.364973	0.364973	0.364973	1.49395	0.579134	0.579134	0.579134	-0.326522	0.530143	0.530143	0.530143	1.5247	5.30143e-07	1.5247	0.33193	0.739942	1	5.30143e-07	1.5247	0.33193	0.739942	1	0.738884	1.01038	-0.436581	8	8	0.738884	contigs_merge_contig_10316	0	634	1.01038	-0.436581	0.738884	1.10386	1.54052	0.142553	11	11	1.10386	contigs_merge_contig_10316	0	634	1.54052	0.142553	1.10386
contigs_merge_contig_10317	0.0494461	0.0494461	-0.0494461	#DIV/0!	#DIV/0!	0	#DIV/0!	0	0.0676146	0.0676146	-0.0676146	#DIV/0!	-6.76146e-08	#DIV/0!	-0.260028	0.794842	1	-6.76146e-08	#DIV/0!	-0.260028	0.794842	1	0.0494461	0.0676146	-4.338	4	4	0.0494461	contigs_merge_contig_10317	0	4737	0.0676146	-4.338	0.0494461	0	0	#DIV/0!	0	0	0	contigs_merge_contig_10317	0	4737	0	#DIV/0!	0
contigs_merge_contig_10318	0.835795	0.835795	0.835795	1.78067	0.832421	0.832421	0.832421	9.45649	1.19655	1.19655	1.19655	1.81732	1.19655e-06	1.81732	0.589173	0.555745	1	1.19655e-06	1.81732	0.589173	0.555745	1	1.07061	1.464	0.0984357	31	36	1.07061	contigs_merge_contig_10318	0	1969	1.464	0.0984357	1.07061	1.90641	2.66055	0.930856	56	59	1.90641	contigs_merge_contig_10318	0	1969	2.66055	0.930856	1.90641
contigs_merge_contig_10319	0.022509	0.022509	-0.022509	-1.02866	0.0407621	0.0407621	-0.0407621	-0.882998	0.00867612	0.00867612	-0.00867612	-1.00791	-8.67612e-09	-1.00791	-0.00584808	0.995334	1	-8.67612e-09	-1.00791	-0.00584808	0.995334	1	0.80797	1.10485	-0.307627	23	38	0.80797	contigs_merge_contig_10319	0	2754	1.10485	-0.307627	0.80797	0.785461	1.09617	-0.348389	28	34	0.785461	contigs_merge_contig_10319	0	2754	1.09617	-0.348389	0.785461
contigs_merge_contig_1032	0.29886	0.29886	0.29886	2.17302	1.1197	1.1197	1.1197	0.432397	0.424254	0.424254	0.424254	2.21774	4.24254e-07	2.21774	0.400696	0.688644	1	4.24254e-07	2.21774	0.400696	0.688644	1	0.254778	0.348394	-1.97269	6	6	0.254778	contigs_merge_contig_1032	0	1379	0.348394	-1.97269	0.254778	0.553639	0.772648	-0.852984	12	12	0.553639	contigs_merge_contig_1032	0	1379	0.772648	-0.852984	0.553639
contigs_merge_contig_10320	0.0767922	0.0767922	0.0767922	#DIV/0!	#DIV/0!	0	#DIV/0!	0	0.10717	0.10717	0.10717	#DIV/0!	1.0717e-07	#DIV/0!	0.327368	0.74339	1	1.0717e-07	#DIV/0!	0.327368	0.74339	1	0	0	#DIV/0!	0	0	0	contigs_merge_contig_10320	0	1657	0	#DIV/0!	0	0.0767922	0.10717	-3.7029	2	2	0.0767922	contigs_merge_contig_10320	0	1657	0.10717	-3.7029	0.0767922
contigs_merge_contig_10321	0.071161	0.071161	0.071161	1.04627	0.0652547	0.0652547	0.0652547	1.10508	0.142591	0.142591	0.142591	1.0678	1.42591e-07	1.0678	0.0683771	0.945485	1	1.42591e-07	1.0678	0.0683771	0.945485	1	1.53796	2.10307	0.621021	19	27	1.53796	contigs_merge_contig_10321	0	1028	2.10307	0.621021	1.53796	1.60912	2.24566	0.686276	15	26	1.60912	contigs_merge_contig_10321	0	1028	2.24566	0.686276	1.60912
contigs_merge_contig_10322	0.0603627	0.0603627	0.0603627	#DIV/0!	#DIV/0!	0	#DIV/0!	0	0.0842411	0.0842411	0.0842411	#DIV/0!	8.42411e-08	#DIV/0!	0.290243	0.77163	1	8.42411e-08	#DIV/0!	0.290243	0.77163	1	0	0	#DIV/0!	0	0	0	contigs_merge_contig_10322	0	1054	0	#DIV/0!	0	0.0603627	0.0842411	-4.0502	0	1	0.0603627	contigs_merge_contig_10322	0	1054	0.0842411	-4.0502	0.0603627
contigs_merge_contig_10323	1.3776	1.3776	1.3776	32.5953	5.02659	5.02659	5.02659	-0.112205	1.92378	1.92378	1.92378	33.2661	1.92378e-06	33.2661	1.34592	0.178329	1	1.92378e-06	33.2661	1.34592	0.178329	1	0.0436013	0.0596222	-4.51949	0	1	0.0436013	contigs_merge_contig_10323	0	1343	0.0596222	-4.51949	0.0436013	1.4212	1.9834	0.507108	3	30	1.4212	contigs_merge_contig_10323	0	1343	1.9834	0.507108	1.4212
contigs_merge_contig_10324	0.0065832	0.0065832	0.0065832	1.08651	0.119703	0.119703	0.119703	0.967787	0.0113288	0.0113288	0.0113288	1.10887	1.13288e-08	1.10887	0.0241837	0.980706	1	1.13288e-08	1.10887	0.0241837	0.980706	1	0.0760969	0.104058	-3.71602	4	4	0.0760969	contigs_merge_contig_10324	0	3078	0.104058	-3.71602	0.0760969	0.0826801	0.115387	-3.59632	4	4	0.0826801	contigs_merge_contig_10324	0	3078	0.115387	-3.59632	0.0826801
contigs_merge_contig_10325	0.331891	0.331891	0.331891	1.68234	0.750469	0.750469	0.750469	0.278242	0.476869	0.476869	0.476869	1.71696	4.76869e-07	1.71696	0.354736	0.722787	1	4.76869e-07	1.71696	0.354736	0.722787	1	0.486402	0.665126	-1.03978	28	31	0.486402	contigs_merge_contig_10325	0	3732	0.665126	-1.03978	0.486402	0.818293	1.14199	-0.28931	41	48	0.818293	contigs_merge_contig_10325	0	3732	1.14199	-0.28931	0.818293
contigs_merge_contig_10326	0	0	0	1	#NUM!	0	#NUM!	#NUM!	0	0	0	1	0	1	0	1	1	0	1	0	1	1	0	0	#DIV/0!	0	0	0	contigs_merge_contig_10326	0	1991	0	#DIV/0!	0	0	0	#DIV/0!	0	0	0	contigs_merge_contig_10326	0	1991	0	#DIV/0!	0
contigs_merge_contig_10327	0	0	0	1	#NUM!	0	#NUM!	#NUM!	0	0	0	1	0	1	0	1	1	0	1	0	1	1	0	0	#DIV/0!	0	0	0	contigs_merge_contig_10327	0	482	0	#DIV/0!	0	0	0	#DIV/0!	0	0	0	contigs_merge_contig_10327	0	482	0	#DIV/0!	0
contigs_merge_contig_10328	0.377862	0.377862	0.377862	1.35814	0.441631	0.441631	0.441631	6.71008	0.557028	0.557028	0.557028	1.38609	5.57028e-07	1.38609	0.30022	0.76401	1	5.57028e-07	1.38609	0.30022	0.76401	1	1.05507	1.44275	0.0773423	16	16	1.05507	contigs_merge_contig_10328	0	888	1.44275	0.0773423	1.05507	1.43293	1.99978	0.518973	19	20	1.43293	contigs_merge_contig_10328	0	888	1.99978	0.518973	1.43293
contigs_merge_contig_10329	0.704425	0.704425	0.704425	5.21525	2.38274	2.38274	2.38274	0.0768524	0.987785	0.987785	0.987785	5.32258	9.87785e-07	5.32258	0.82178	0.411202	1	9.87785e-07	5.32258	0.82178	0.411202	1	0.167113	0.228518	-2.5811	3	5	0.167113	contigs_merge_contig_10329	0	1752	0.228518	-2.5811	0.167113	0.871538	1.2163	-0.198364	15	24	0.871538	contigs_merge_contig_10329	0	1752	1.2163	-0.198364	0.871538
contigs_merge_contig_1033	1.0152	1.0152	1.0152	1.22892	0.297388	0.297388	0.297388	1.13839	1.5416	1.5416	1.5416	1.25421	1.5416e-06	1.25421	0.41695	0.676715	1	1.5416e-06	1.25421	0.416951	0.676715	1	4.4348	6.06432	2.14887	185	206	4.4348	contigs_merge_contig_1033	0	2720	6.06432	2.14887	4.4348	5.45	7.60592	2.44626	222	233	5.45	contigs_merge_contig_1033	0	2720	7.60592	2.44626	5.45
contigs_merge_contig_10330	0.991153	0.991153	0.991153	2.04668	1.03329	1.03329	1.03329	-12.1386	1.40988	1.40988	1.40988	2.0888	1.40988e-06	2.0888	0.704971	0.480828	1	1.40988e-06	2.0888	0.704971	0.480828	1	0.946946	1.29489	-0.0786452	13	43	0.946946	contigs_merge_contig_10330	0	2659	1.29489	-0.0786452	0.946946	1.9381	2.70478	0.954643	23	81	1.9381	contigs_merge_contig_10330	0	2659	2.70478	0.954643	1.9381
contigs_merge_contig_10331	0.0641267	0.0641267	-0.0641267	-1.56464	0.645832	0.645832	-0.645832	-0.794212	0.0844935	0.0844935	-0.0844935	-1.53309	-8.44935e-08	-1.53309	-0.133348	0.893918	1	-8.44935e-08	-1.53309	-0.133348	0.893918	1	0.177697	0.242991	-2.49251	15	17	0.177697	contigs_merge_contig_10331	0	5602	0.242991	-2.49251	0.177697	0.113571	0.158497	-3.13834	10	10	0.113571	contigs_merge_contig_10331	0	5602	0.158497	-3.13834	0.113571
contigs_merge_contig_10332	0.0266071	0.0266071	-0.0266071	-1.38057	0.46526	0.46526	-0.46526	-0.878784	0.0344162	0.0344162	-0.0344162	-1.35273	-3.44162e-08	-1.35273	-0.0718316	0.942736	1	-3.44162e-08	-1.35273	-0.0718316	0.942736	1	0.0965218	0.131988	-3.373	3	3	0.0965218	contigs_merge_contig_10332	0	1820	0.131988	-3.373	0.0965218	0.0699146	0.0975715	-3.83826	2	2	0.0699146	contigs_merge_contig_10332	0	1820	0.0975715	-3.83826	0.0699146
contigs_merge_contig_10333	0.254594	0.254594	-0.254594	#DIV/0!	#DIV/0!	0	#DIV/0!	0	0.348142	0.348142	-0.348142	#DIV/0!	-3.48142e-07	#DIV/0!	-0.590035	0.555167	1	-3.48142e-07	#DIV/0!	-0.590035	0.555167	1	0.254594	0.348142	-1.97373	1	1	0.254594	contigs_merge_contig_10333	0	230	0.348142	-1.97373	0.254594	0	0	#DIV/0!	0	0	0	contigs_merge_contig_10333	0	230	0	#DIV/0!	0
contigs_merge_contig_10334	0	0	0	1	#NUM!	0	#NUM!	#NUM!	0	0	0	1	0	1	0	1	1	0	1	0	1	1	0	0	#DIV/0!	0	0	0	contigs_merge_contig_10334	0	713	0	#DIV/0!	0	0	0	#DIV/0!	0	0	0	contigs_merge_contig_10334	0	713	0	#DIV/0!	0
contigs_merge_contig_10335	0.1314	0.1314	0.1314	1.047	0.0662633	0.0662633	0.0662633	1.04468	0.262052	0.262052	0.262052	1.06855	2.62052e-07	1.06855	0.0931878	0.925754	1	2.62052e-07	1.06855	0.0931878	0.925754	1	2.79567	3.82291	1.48319	41	55	2.79567	contigs_merge_contig_10335	0	1152	3.82291	1.48319	2.79567	2.92707	4.08496	1.54946	38	53	2.92707	contigs_merge_contig_10335	0	1152	4.08496	1.54946	2.92707
contigs_merge_contig_10336	0.175057	0.175057	-0.175057	#DIV/0!	#DIV/0!	0	#DIV/0!	0	0.23938	0.23938	-0.23938	#DIV/0!	-2.3938e-07	#DIV/0!	-0.489265	0.624654	1	-2.3938e-07	#DIV/0!	-0.489265	0.624654	1	0.175057	0.23938	-2.5141	2	2	0.175057	contigs_merge_contig_10336	0	669	0.23938	-2.5141	0.175057	0	0	#DIV/0!	0	0	0	contigs_merge_contig_10336	0	669	0	#DIV/0!	0
contigs_merge_contig_10337	0	0	0	1	#NUM!	0	#NUM!	#NUM!	0	0	0	1	0	1	0	1	1	0	1	0	1	1	0	0	#DIV/0!	0	0	0	contigs_merge_contig_10337	0	489	0	#DIV/0!	0	0	0	#DIV/0!	0	0	0	contigs_merge_contig_10337	0	489	0	#DIV/0!	0
contigs_merge_contig_10338	0	0	0	1	#NUM!	0	#NUM!	#NUM!	0	0	0	1	0	1	0	1	1	0	1	0	1	1	0	0	#DIV/0!	0	0	0	contigs_merge_contig_10338	0	827	0	#DIV/0!	0	0	0	#DIV/0!	0	0	0	contigs_merge_contig_10338	0	827	0	#DIV/0!	0
contigs_merge_contig_10339	1.91669	1.91669	1.91669	8.69209	3.1197	3.1197	3.1197	-0.556149	2.68191	2.68191	2.68191	8.87096	2.68191e-06	8.87096	1.46237	0.143641	1	2.68191e-06	8.87096	1.46237	0.143641	1	0.249177	0.340734	-2.00476	1	1	0.249177	contigs_merge_contig_10339	0	235	0.340734	-2.00476	0.249177	2.16587	3.02264	1.11494	8	8	2.16587	contigs_merge_contig_10339	0	235	3.02264	1.11494	2.16587
contigs_merge_contig_1034	2.39198	2.39198	2.39198	1.92977	0.948431	0.948431	0.948431	1.69571	3.4106	3.4106	3.4106	1.96949	3.4106e-06	1.96949	1.05523	0.291321	1	3.4106e-06	1.96949	1.05523	0.291321	1	2.57265	3.51794	1.36325	130	134	2.57265	contigs_merge_contig_1034	0	3050	3.51794	1.36325	2.57265	4.96463	6.92854	2.31168	225	238	4.96463	contigs_merge_contig_1034	0	3050	6.92854	2.31168	4.96463
contigs_merge_contig_10340	0.1874	0.1874	0.1874	#DIV/0!	#DIV/0!	0	#DIV/0!	0	0.261532	0.261532	0.261532	#DIV/0!	2.61532e-07	#DIV/0!	0.511402	0.60907	1	2.61532e-07	#DIV/0!	0.511402	0.60907	1	0	0	#DIV/0!	0	0	0	contigs_merge_contig_10340	0	679	0	#DIV/0!	0	0.1874	0.261532	-2.41581	2	2	0.1874	contigs_merge_contig_10340	0	679	0.261532	-2.41581	0.1874
contigs_merge_contig_10341	0.444393	0.444393	0.444393	#DIV/0!	#DIV/0!	0	#DIV/0!	0	0.620187	0.620187	0.620187	#DIV/0!	6.20187e-07	#DIV/0!	0.78752	0.430978	1	6.20187e-07	#DIV/0!	0.78752	0.430978	1	0	0	#DIV/0!	0	0	0	contigs_merge_contig_10341	0	1718	0	#DIV/0!	0	0.444393	0.620187	-1.17009	10	12	0.444393	contigs_merge_contig_10341	0	1718	0.620187	-1.17009	0.444393
contigs_merge_contig_10342	0.306985	0.306985	0.306985	3.25953	1.70467	1.70467	1.70467	0.408058	0.432245	0.432245	0.432245	3.32661	4.32245e-07	3.32661	0.482118	0.629722	1	4.32245e-07	3.32661	0.482118	0.629722	1	0.135862	0.185783	-2.87979	2	2	0.135862	contigs_merge_contig_10342	0	862	0.185783	-2.87979	0.135862	0.442847	0.618029	-1.17512	6	6	0.442847	contigs_merge_contig_10342	0	862	0.618029	-1.17512	0.442847
contigs_merge_contig_10343	0.054378	0.054378	0.054378	#DIV/0!	#DIV/0!	0	#DIV/0!	0	0.075889	0.075889	0.075889	#DIV/0!	7.5889e-08	#DIV/0!	0.27548	0.782948	1	7.5889e-08	#DIV/0!	0.27548	0.782948	1	0	0	#DIV/0!	0	0	0	contigs_merge_contig_10343	0	1170	0	#DIV/0!	0	0.054378	0.075889	-4.20083	1	1	0.054378	contigs_merge_contig_10343	0	1170	0.075889	-4.20083	0.054378
contigs_merge_contig_10344	0.258627	0.258627	0.258627	#DIV/0!	#DIV/0!	0	#DIV/0!	0	0.360935	0.360935	0.360935	#DIV/0!	3.60935e-07	#DIV/0!	0.600779	0.547987	1	3.60935e-07	#DIV/0!	0.600779	0.547987	1	0	0	#DIV/0!	0	0	0	contigs_merge_contig_10344	0	246	0	#DIV/0!	0	0.258627	0.360935	-1.95105	1	1	0.258627	contigs_merge_contig_10344	0	246	0.360935	-1.95105	0.258627
contigs_merge_contig_10345	0	0	0	1	#NUM!	0	#NUM!	#NUM!	0	0	0	1	0	1	0	1	1	0	1	0	1	1	0	0	#DIV/0!	0	0	0	contigs_merge_contig_10345	0	308	0	#DIV/0!	0	0	0	#DIV/0!	0	0	0	contigs_merge_contig_10345	0	308	0	#DIV/0!	0
contigs_merge_contig_10346	0.277873	0.277873	0.277873	1.72031	0.782668	0.782668	0.782668	0.430452	0.39865	0.39865	0.39865	1.75571	3.9865e-07	1.75571	0.330641	0.740915	1	3.9865e-07	1.75571	0.330641	0.740915	1	0.385769	0.527516	-1.37419	23	24	0.385769	contigs_merge_contig_10346	0	3643	0.527516	-1.37419	0.385769	0.663642	0.926166	-0.591523	38	38	0.663642	contigs_merge_contig_10346	0	3643	0.926166	-0.591523	0.663642
contigs_merge_contig_10347	11.4822	11.4822	11.4822	2.95632	1.5638	1.5638	1.5638	1.61249	16.1896	16.1896	16.1896	3.01716	1.61896e-05	3.01716	2.85123	0.0043551	0.416927	1.61896e-05	3.01716	2.85123	0.00435508	0.416924	5.8693	8.02592	2.55319	43	43	5.8693	contigs_merge_contig_10347	0	429	8.02592	2.55319	5.8693	17.3515	24.2155	4.11699	117	117	17.3515	contigs_merge_contig_10347	0	429	24.2155	4.11699	17.3515
contigs_merge_contig_10348	1.59495	1.59495	-1.59495	-1.64901	0.7216	0.7216	-0.7216	-1.55628	2.11184	2.11184	-2.11184	-1.61576	-2.11184e-06	-1.61576	-0.705079	0.480761	1	-2.11184e-06	-1.61576	-0.70508	0.480761	1	4.05246	5.5415	2.0188	128	129	4.05246	contigs_merge_contig_10348	0	1864	5.5415	2.0188	4.05246	2.45751	3.42966	1.2972	72	72	2.45751	contigs_merge_contig_10348	0	1864	3.42966	1.2972	2.45751
contigs_merge_contig_10349	0.0690525	0.0690525	-0.0690525	#DIV/0!	#DIV/0!	0	#DIV/0!	0	0.0944252	0.0944252	-0.0944252	#DIV/0!	-9.44252e-08	#DIV/0!	-0.307287	0.758625	1	-9.44252e-08	#DIV/0!	-0.307287	0.758625	1	0.0690525	0.0944252	-3.85616	0	1	0.0690525	contigs_merge_contig_10349	0	848	0.0944252	-3.85616	0.0690525	0	0	#DIV/0!	0	0	0	contigs_merge_contig_10349	0	848	0	#DIV/0!	0
contigs_merge_contig_1035	4.13478	4.13478	4.13478	2.64384	1.40264	1.40264	1.40264	2.05403	5.84121	5.84121	5.84121	2.69825	5.84121e-06	2.69825	1.63778	0.101468	1	5.84121e-06	2.69825	1.63778	0.101468	1	2.51531	3.43954	1.33074	150	150	2.51531	contigs_merge_contig_1035	0	3492	3.43954	1.33074	2.51531	6.6501	9.28075	2.73338	365	365	6.6501	contigs_merge_contig_1035	0	3492	9.28075	2.73338	6.6501
contigs_merge_contig_10350	0.0203469	0.0203469	-0.0203469	-1.22717	0.295335	0.295335	-0.295335	-0.915155	0.0253027	0.0253027	-0.0253027	-1.20242	-2.53027e-08	-1.20242	-0.0482241	0.961538	1	-2.53027e-08	-1.20242	-0.0482241	0.961538	1	0.109914	0.1503	-3.18556	4	4	0.109914	contigs_merge_contig_10350	0	2131	0.1503	-3.18556	0.109914	0.0895668	0.124998	-3.48089	3	3	0.0895668	contigs_merge_contig_10350	0	2131	0.124998	-3.48089	0.0895668
contigs_merge_contig_10351	0	0	0	1	#NUM!	0	#NUM!	#NUM!	0	0	0	1	0	1	0	1	1	0	1	0	1	1	0	0	#DIV/0!	0	0	0	contigs_merge_contig_10351	0	995	0	#DIV/0!	0	0	0	#DIV/0!	0	0	0	contigs_merge_contig_10351	0	995	0	#DIV/0!	0
contigs_merge_contig_10352	16.2495	16.2495	-16.2495	-1.2734	0.348684	0.348684	-0.348684	-1.05917	20.5476	20.5476	-20.5476	-1.24772	-2.05476e-05	-1.24772	-1.50492	0.132346	1	-2.05476e-05	-1.24772	-1.50492	0.132346	1	75.6846	103.494	6.24193	706	707	75.6846	contigs_merge_contig_10352	0	547	103.494	6.24193	75.6846	59.4351	82.9465	5.89324	511	511	59.4351	contigs_merge_contig_10352	0	547	82.9465	5.89324	59.4351
contigs_merge_contig_10353	14.7487	14.7487	-14.7487	-1.18946	0.250304	0.250304	-0.250304	-1.03984	17.9773	17.9773	-17.9773	-1.16547	-1.79773e-05	-1.16547	-1.17213	0.241146	1	-1.79773e-05	-1.16547	-1.17213	0.241146	1	92.5955	126.619	6.53287	389	389	92.5955	contigs_merge_contig_10353	0	246	126.619	6.53287	92.5955	77.8468	108.642	6.28257	301	301	77.8468	contigs_merge_contig_10353	0	246	108.642	6.28257	77.8468
contigs_merge_contig_10354	0.0277577	0.0277577	0.0277577	1.08651	0.119703	0.119703	0.119703	0.92701	0.0477673	0.0477673	0.0477673	1.10887	4.77673e-08	1.10887	0.0496587	0.960394	1	4.77673e-08	1.10887	0.0496587	0.960394	1	0.320858	0.438754	-1.63999	2	2	0.320858	contigs_merge_contig_10354	0	365	0.438754	-1.63999	0.320858	0.348615	0.486521	-1.52029	2	2	0.348615	contigs_merge_contig_10354	0	365	0.486521	-1.52029	0.348615
contigs_merge_contig_10355	0.225217	0.225217	-0.225217	#DIV/0!	#DIV/0!	0	#DIV/0!	0	0.307971	0.307971	-0.307971	#DIV/0!	-3.07971e-07	#DIV/0!	-0.554952	0.578928	1	-3.07971e-07	#DIV/0!	-0.554952	0.578928	1	0.225217	0.307971	-2.15061	1	1	0.225217	contigs_merge_contig_10355	0	260	0.307971	-2.15061	0.225217	0	0	#DIV/0!	0	0	0	contigs_merge_contig_10355	0	260	0	#DIV/0!	0
contigs_merge_contig_10356	0	0	0	1	#NUM!	0	#NUM!	#NUM!	0	0	0	1	0	1	0	1	1	0	1	0	1	1	0	0	#DIV/0!	0	0	0	contigs_merge_contig_10356	0	1274	0	#DIV/0!	0	0	0	#DIV/0!	0	0	0	contigs_merge_contig_10356	0	1274	0	#DIV/0!	0
contigs_merge_contig_10357	0	0	0	1	#NUM!	0	#NUM!	#NUM!	0	0	0	1	0	1	0	1	1	0	1	0	1	1	0	0	#DIV/0!	0	0	0	contigs_merge_contig_10357	0	407	0	#DIV/0!	0	0	0	#DIV/0!	0	0	0	contigs_merge_contig_10357	0	407	0	#DIV/0!	0
contigs_merge_contig_10358	0.440828	0.440828	0.440828	1.11853	0.161609	0.161609	0.161609	1.08529	0.719868	0.719868	0.719868	1.14155	7.19868e-07	1.14155	0.218134	0.827325	1	7.19868e-07	1.14155	0.218134	0.827325	1	3.71899	5.0855	1.89491	475	475	3.71899	contigs_merge_contig_10358	0	7479	5.0855	1.89491	3.71899	4.15982	5.80537	2.05652	489	489	4.15982	contigs_merge_contig_10358	0	7479	5.80537	2.05652	4.15982
contigs_merge_contig_10359	16.845	16.845	16.845	2.27552	1.1862	1.1862	1.1862	1.3186	23.8802	23.8802	23.8802	2.32235	2.38802e-05	2.32235	3.08302	0.00204911	0.22041	2.38802e-05	2.32235	3.08303	0.00204909	0.220408	13.2064	18.0589	3.72316	35	106	13.2064	contigs_merge_contig_10359	0	470	18.0589	3.72316	13.2064	30.0514	41.9392	4.90936	80	222	30.0514	contigs_merge_contig_10359	0	470	41.9392	4.90936	30.0514
contigs_merge_contig_1036	38.9326	38.9326	-38.9326	-1.13669	0.184845	0.184845	-0.184845	-1.02267	45.223	45.223	-45.223	-1.11377	-4.5223e-05	-1.11377	-1.5605	0.118642	1	-4.5223e-05	-1.11377	-1.5605	0.118642	1	323.746	442.703	8.33872	14242	20462	323.746	contigs_merge_contig_1036	0	3701	442.703	8.33872	323.746	284.813	397.48	8.15387	11030	16568	284.813	contigs_merge_contig_1036	0	3701	397.48	8.15387	284.813
contigs_merge_contig_10360	0.295231	0.295231	0.295231	#DIV/0!	#DIV/0!	0	#DIV/0!	0	0.412019	0.412019	0.412019	#DIV/0!	4.12019e-07	#DIV/0!	0.641887	0.520946	1	4.12019e-07	#DIV/0!	0.641887	0.520947	1	0	0	#DIV/0!	0	0	0	contigs_merge_contig_10360	0	862	0	#DIV/0!	0	0.295231	0.412019	-1.76008	4	4	0.295231	contigs_merge_contig_10360	0	862	0.412019	-1.76008	0.295231
contigs_merge_contig_10361	0.0812524	0.0812524	0.0812524	1.08651	0.119703	0.119703	0.119703	-0.323111	0.139825	0.139825	0.139825	1.10887	1.39825e-07	1.10887	0.0849615	0.932292	1	1.39825e-07	1.10887	0.0849615	0.932292	1	0.939216	1.28432	-0.0904705	24	26	0.939216	contigs_merge_contig_10361	0	1621	1.28432	-0.0904705	0.939216	1.02047	1.42415	0.029232	26	26	1.02047	contigs_merge_contig_10361	0	1621	1.42415	0.029232	1.02047
contigs_merge_contig_10362	6.30772	6.30772	-6.30772	-1.27035	0.345229	0.345229	-0.345229	-1.07597	7.96887	7.96887	-7.96887	-1.24474	-7.96887e-06	-1.24474	-0.932123	0.351273	1	-7.96887e-06	-1.24474	-0.932123	0.351273	1	29.6392	40.5298	4.88943	1216	1314	29.6392	contigs_merge_contig_10362	0	2596	40.5298	4.88943	29.6392	23.3314	32.5609	4.5442	882	952	23.3314	contigs_merge_contig_10362	0	2596	32.5609	4.5442	23.3314
contigs_merge_contig_10363	0.26182	0.26182	0.26182	#DIV/0!	#DIV/0!	0	#DIV/0!	0	0.365391	0.365391	0.365391	#DIV/0!	3.65391e-07	#DIV/0!	0.604476	0.545527	1	3.65391e-07	#DIV/0!	0.604476	0.545527	1	0	0	#DIV/0!	0	0	0	contigs_merge_contig_10363	0	729	0	#DIV/0!	0	0.26182	0.365391	-1.93335	3	3	0.26182	contigs_merge_contig_10363	0	729	0.365391	-1.93335	0.26182
contigs_merge_contig_10364	0.410341	0.410341	0.410341	1.76558	0.820142	0.820142	0.820142	0.0884587	0.587747	0.587747	0.587747	1.80191	5.87747e-07	1.80191	0.41014	0.681703	1	5.87747e-07	1.80191	0.41014	0.681703	1	0.535987	0.73293	-0.899731	8	8	0.535987	contigs_merge_contig_10364	0	874	0.73293	-0.899731	0.535987	0.946327	1.32068	-0.0795891	13	13	0.946327	contigs_merge_contig_10364	0	874	1.32068	-0.0795891	0.946327
contigs_merge_contig_10365	0	0	0	1	#NUM!	0	#NUM!	#NUM!	0	0	0	1	0	1	0	1	1	0	1	0	1	1	0	0	#DIV/0!	0	0	0	contigs_merge_contig_10365	0	1646	0	#DIV/0!	0	0	0	#DIV/0!	0	0	0	contigs_merge_contig_10365	0	1646	0	#DIV/0!	0
contigs_merge_contig_10366	0.0571841	0.0571841	-0.0571841	#DIV/0!	#DIV/0!	0	#DIV/0!	0	0.0781959	0.0781959	-0.0781959	#DIV/0!	-7.81959e-08	#DIV/0!	-0.279635	0.779757	1	-7.81959e-08	#DIV/0!	-0.279635	0.779757	1	0.0571841	0.0781959	-4.12824	1	1	0.0571841	contigs_merge_contig_10366	0	1024	0.0781959	-4.12824	0.0571841	0	0	#DIV/0!	0	0	0	contigs_merge_contig_10366	0	1024	0	#DIV/0!	0
contigs_merge_contig_10367	0	0	0	1	#NUM!	0	#NUM!	#NUM!	0	0	0	1	0	1	0	1	1	0	1	0	1	1	0	0	#DIV/0!	0	0	0	contigs_merge_contig_10367	0	860	0	#DIV/0!	0	0	0	#DIV/0!	0	0	0	contigs_merge_contig_10367	0	860	0	#DIV/0!	0
contigs_merge_contig_10368	0.409368	0.409368	-0.409368	-1.84075	0.880297	0.880297	-0.880297	-0.152163	0.546084	0.546084	-0.546084	-1.80364	-5.46084e-07	-1.80364	-0.395639	0.692371	1	-5.46084e-07	-1.80364	-0.395639	0.692371	1	0.896273	1.2256	-0.157989	6	6	0.896273	contigs_merge_contig_10368	0	392	1.2256	-0.157989	0.896273	0.486905	0.679516	-1.03829	3	3	0.486905	contigs_merge_contig_10368	0	392	0.679516	-1.03829	0.486905
contigs_merge_contig_10369	1.57747	1.57747	1.57747	2.21326	1.14617	1.14617	1.14617	4.02646	2.23807	2.23807	2.23807	2.25881	2.23807e-06	2.25881	0.929797	0.352476	1	2.23807e-06	2.25881	0.929798	0.352476	1	1.30019	1.77793	0.378718	27	27	1.30019	contigs_merge_contig_10369	0	1216	1.77793	0.378718	1.30019	2.87765	4.016	1.52489	55	55	2.87765	contigs_merge_contig_10369	0	1216	4.016	1.52489	2.87765
contigs_merge_contig_1037	0.0092105	0.0092105	0.0092105	1.08651	0.119703	0.119703	0.119703	0.962958	0.0158501	0.0158501	0.0158501	1.10887	1.58501e-08	1.10887	0.0286052	0.977179	1	1.58501e-08	1.10887	0.0286052	0.977179	1	0.106466	0.145586	-3.23153	6	6	0.106466	contigs_merge_contig_1037	0	3300	0.145586	-3.23153	0.106466	0.115677	0.161437	-3.11183	4	6	0.115677	contigs_merge_contig_1037	0	3300	0.161437	-3.11183	0.115677
contigs_merge_contig_10370	1.40085	1.40085	1.40085	3.25953	1.70467	1.70467	1.70467	-1.47153	1.97245	1.97245	1.97245	3.32661	1.97245e-06	3.32661	1.02989	0.303061	1	1.97245e-06	3.32661	1.02989	0.303061	1	0.619974	0.847777	-0.689721	20	20	0.619974	contigs_merge_contig_10370	0	1889	0.847777	-0.689721	0.619974	2.02082	2.82023	1.01494	60	60	2.02082	contigs_merge_contig_10370	0	1889	2.82023	1.01494	2.02082
contigs_merge_contig_10371	0	0	0	1	#NUM!	0	#NUM!	#NUM!	0	0	0	1	0	1	0	1	1	0	1	0	1	1	0	0	#DIV/0!	0	0	0	contigs_merge_contig_10371	0	413	0	#DIV/0!	0	0	0	#DIV/0!	0	0	0	contigs_merge_contig_10371	0	413	0	#DIV/0!	0
contigs_merge_contig_10372	0	0	0	1	#NUM!	0	#NUM!	#NUM!	0	0	0	1	0	1	0	1	1	0	1	0	1	1	0	0	#DIV/0!	0	0	0	contigs_merge_contig_10372	0	841	0	#DIV/0!	0	0	0	#DIV/0!	0	0	0	contigs_merge_contig_10372	0	841	0	#DIV/0!	0
contigs_merge_contig_10373	0.240564	0.240564	0.240564	3.25953	1.70467	1.70467	1.70467	0.47249	0.338723	0.338723	0.338723	3.32661	3.38723e-07	3.32661	0.426786	0.669535	1	3.38723e-07	3.32661	0.426786	0.669535	1	0.106466	0.145586	-3.23153	1	1	0.106466	contigs_merge_contig_10373	0	550	0.145586	-3.23153	0.106466	0.347031	0.48431	-1.52686	3	3	0.347031	contigs_merge_contig_10373	0	550	0.48431	-1.52686	0.347031
contigs_merge_contig_10374	0	0	0	1	#NUM!	0	#NUM!	#NUM!	0	0	0	1	0	1	0	1	1	0	1	0	1	1	0	0	#DIV/0!	0	0	0	contigs_merge_contig_10374	0	257	0	#DIV/0!	0	0	0	#DIV/0!	0	0	0	contigs_merge_contig_10374	0	257	0	#DIV/0!	0
contigs_merge_contig_10375	0.243986	0.243986	-0.243986	#DIV/0!	#DIV/0!	0	#DIV/0!	0	0.333636	0.333636	-0.333636	#DIV/0!	-3.33636e-07	#DIV/0!	-0.577612	0.563526	1	-3.33636e-07	#DIV/0!	-0.577612	0.563526	1	0.243986	0.333636	-2.03513	1	1	0.243986	contigs_merge_contig_10375	0	240	0.333636	-2.03513	0.243986	0	0	#DIV/0!	0	0	0	contigs_merge_contig_10375	0	240	0	#DIV/0!	0
contigs_merge_contig_10376	0.98763	0.98763	0.98763	2.26356	1.1786	1.1786	1.1786	-2.31572	1.40031	1.40031	1.40031	2.31015	1.40031e-06	2.31015	0.744474	0.45659	1	1.40031e-06	2.31015	0.744474	0.45659	1	0.781622	1.06882	-0.355457	12	12	0.781622	contigs_merge_contig_10376	0	899	1.06882	-0.355457	0.781622	1.76925	2.46914	0.82314	23	25	1.76925	contigs_merge_contig_10376	0	899	2.46914	0.82314	1.76925
contigs_merge_contig_10377	0.43991	0.43991	0.43991	1.31287	0.392721	0.392721	0.392721	1.79877	0.653498	0.653498	0.653498	1.33989	6.53498e-07	1.33989	0.3081	0.758006	1	6.53498e-07	1.33989	0.3081	0.758006	1	1.40606	1.9227	0.491658	0	48	1.40606	contigs_merge_contig_10377	0	1999	1.9227	0.491658	1.40606	1.84597	2.5762	0.884379	1	58	1.84597	contigs_merge_contig_10377	0	1999	2.5762	0.884379	1.84597
contigs_merge_contig_10378	0.962398	0.962398	0.962398	5.97581	2.57913	2.57913	2.57913	-0.0881389	1.34855	1.34855	1.34855	6.09879	1.34855e-06	6.09879	0.984181	0.325027	1	1.34855e-06	6.09879	0.984181	0.325027	1	0.193415	0.264484	-2.37023	4	4	0.193415	contigs_merge_contig_10378	0	1211	0.264484	-2.37023	0.193415	1.15581	1.61303	0.208909	22	22	1.15581	contigs_merge_contig_10378	0	1211	1.61303	0.208909	1.15581
contigs_merge_contig_10379	0.136289	0.136289	-0.136289	-1.06107	0.0855226	0.0855226	-0.0855226	-1.07385	0.123568	0.123568	-0.123568	-1.03968	-1.23568e-07	-1.03968	-0.0490272	0.960898	1	-1.23568e-07	-1.03968	-0.0490272	0.960898	1	2.3679	3.23797	1.24361	147	181	2.3679	contigs_merge_contig_10379	0	4476	3.23797	1.24361	2.3679	2.23161	3.1144	1.15809	134	157	2.23161	contigs_merge_contig_10379	0	4476	3.1144	1.15809	2.23161
contigs_merge_contig_1038	0.140447	0.140447	0.140447	#DIV/0!	#DIV/0!	0	#DIV/0!	0	0.196005	0.196005	0.196005	#DIV/0!	1.96005e-07	#DIV/0!	0.442724	0.657965	1	1.96005e-07	#DIV/0!	0.442724	0.657965	1	0	0	#DIV/0!	0	0	0	contigs_merge_contig_1038	0	453	0	#DIV/0!	0	0.140447	0.196005	-2.83191	1	1	0.140447	contigs_merge_contig_1038	0	453	0.196005	-2.83191	0.140447
contigs_merge_contig_10380	0.00821033	0.00821033	0.00821033	1.08651	0.119703	0.119703	0.119703	0.964766	0.0141289	0.0141289	0.0141289	1.10887	1.41289e-08	1.10887	0.0270075	0.978454	1	1.41289e-08	1.10887	0.0270075	0.978454	1	0.0949052	0.129777	-3.39737	0	1	0.0949052	contigs_merge_contig_10380	0	617	0.129777	-3.39737	0.0949052	0.103116	0.143906	-3.27767	1	1	0.103116	contigs_merge_contig_10380	0	617	0.143906	-3.27767	0.103116
contigs_merge_contig_10381	0.149664	0.149664	0.149664	2.71628	1.44163	1.44163	1.44163	0.590386	0.211322	0.211322	0.211322	2.77218	2.11322e-07	2.77218	0.315087	0.752696	1	2.11322e-07	2.77218	0.315087	0.752696	1	0.0872026	0.119244	-3.51949	2	2	0.0872026	contigs_merge_contig_10381	0	1343	0.119244	-3.51949	0.0872026	0.236866	0.330566	-2.07785	5	5	0.236866	contigs_merge_contig_10381	0	1343	0.330566	-2.07785	0.236866
contigs_merge_contig_10382	0.574084	0.574084	-0.574084	#DIV/0!	#DIV/0!	0	#DIV/0!	0	0.785025	0.785025	-0.785025	#DIV/0!	-7.85025e-07	#DIV/0!	-0.886017	0.375609	1	-7.85025e-07	#DIV/0!	-0.886017	0.375609	1	0.574084	0.785025	-0.800667	0	2	0.574084	contigs_merge_contig_10382	0	204	0.785025	-0.800667	0.574084	0	0	#DIV/0!	0	0	0	contigs_merge_contig_10382	0	204	0	#DIV/0!	0
contigs_merge_contig_10383	0	0	0	1	#NUM!	0	#NUM!	#NUM!	0	0	0	1	0	1	0	1	1	0	1	0	1	1	0	0	#DIV/0!	0	0	0	contigs_merge_contig_10383	0	633	0	#DIV/0!	0	0	0	#DIV/0!	0	0	0	contigs_merge_contig_10383	0	633	0	#DIV/0!	0
contigs_merge_contig_10384	2.04934	2.04934	-2.04934	-1.36497	0.448866	0.448866	-0.448866	-1.18032	2.64433	2.64433	-2.64433	-1.33744	-2.64433e-06	-1.33744	-0.617859	0.536668	1	-2.64433e-06	-1.33744	-0.617859	0.536668	1	7.66447	10.4807	2.93819	350	350	7.66447	contigs_merge_contig_10384	0	2674	10.4807	2.93819	7.66447	5.61513	7.83637	2.48932	236	236	5.61513	contigs_merge_contig_10384	0	2674	7.83637	2.48932	5.61513
contigs_merge_contig_10385	0.235244	0.235244	0.235244	1.86259	0.89731	0.89731	0.89731	0.521311	0.335977	0.335977	0.335977	1.90092	3.35977e-07	1.90092	0.323021	0.74668	1	3.35977e-07	1.90092	0.323021	0.74668	1	0.272718	0.372926	-1.87452	2	7	0.272718	contigs_merge_contig_10385	0	1503	0.372926	-1.87452	0.272718	0.507962	0.708903	-0.977206	3	12	0.507962	contigs_merge_contig_10385	0	1503	0.708903	-0.977206	0.507962
contigs_merge_contig_10386	0.234832	0.234832	0.234832	1.32796	0.409209	0.409209	0.409209	0.150805	0.347878	0.347878	0.347878	1.35529	3.47878e-07	1.35529	0.229077	0.818809	1	3.47878e-07	1.35529	0.229077	0.818809	1	0.716045	0.979148	-0.481879	18	18	0.716045	contigs_merge_contig_10386	0	1472	0.979148	-0.481879	0.716045	0.950877	1.32703	-0.0726697	22	22	0.950877	contigs_merge_contig_10386	0	1472	1.32703	-0.0726697	0.950877
contigs_merge_contig_10387	0.853444	0.853444	0.853444	1.41246	0.498214	0.498214	0.498214	1.47493	1.24928	1.24928	1.24928	1.44153	1.24928e-06	1.44153	0.475313	0.634564	1	1.24928e-06	1.44153	0.475313	0.634564	1	2.06914	2.82942	1.04903	18	20	2.06914	contigs_merge_contig_10387	0	566	2.82942	1.04903	2.06914	2.92258	4.0787	1.54724	25	26	2.92258	contigs_merge_contig_10387	0	566	4.0787	1.54724	2.92258
contigs_merge_contig_10388	0	0	0	1	#NUM!	0	#NUM!	#NUM!	0	0	0	1	0	1	0	1	1	0	1	0	1	1	0	0	#DIV/0!	0	0	0	contigs_merge_contig_10388	0	8419	0	#DIV/0!	0	0	0	#DIV/0!	0	0	0	contigs_merge_contig_10388	0	8419	0	#DIV/0!	0
contigs_merge_contig_10389	0.162686	0.162686	-0.162686	-3.68151	1.8803	1.8803	-1.8803	-0.534911	0.220757	0.220757	-0.220757	-3.60727	-2.20757e-07	-3.60727	-0.35345	0.723751	1	-2.20757e-07	-3.60727	-0.35345	0.723751	1	0.223356	0.305426	-2.16258	12	12	0.223356	contigs_merge_contig_10389	0	3146	0.305426	-2.16258	0.223356	0.0606697	0.0846695	-4.04288	3	3	0.0606697	contigs_merge_contig_10389	0	3146	0.0846695	-4.04288	0.0606697
contigs_merge_contig_1039	1.24256	1.24256	-1.24256	-2.34938	1.23228	1.23228	-1.23228	9.35633	1.67321	1.67321	-1.67321	-2.30201	-1.67321e-06	-2.30201	-0.812258	0.416644	1	-1.67321e-06	-2.30201	-0.812258	0.416644	1	2.16339	2.95831	1.11329	194	194	2.16339	contigs_merge_contig_1039	0	5251	2.95831	1.11329	2.16339	0.920833	1.2851	-0.118988	75	76	0.920833	contigs_merge_contig_1039	0	5251	1.2851	-0.118988	0.920833
contigs_merge_contig_10390	0.0608763	0.0608763	0.0608763	1.67915	0.747734	0.747734	0.747734	0.785121	0.0874803	0.0874803	0.0874803	1.71371	8.74803e-08	1.71371	0.151682	0.879438	1	8.74803e-08	1.71371	0.151682	0.879438	1	0.0896357	0.122571	-3.47978	11	11	0.0896357	contigs_merge_contig_10390	0	7186	0.122571	-3.47978	0.0896357	0.150512	0.210052	-2.73205	17	17	0.150512	contigs_merge_contig_10390	0	7186	0.210052	-2.73205	0.150512
contigs_merge_contig_10391	0.0145765	0.0145765	-0.0145765	-1.07377	0.10269	0.10269	-0.10269	-0.956105	0.0143723	0.0143723	-0.0143723	-1.05212	-1.43723e-08	-1.05212	-0.0191061	0.984756	1	-1.43723e-08	-1.05212	-0.0191061	0.984756	1	0.212161	0.290118	-2.23677	7	7	0.212161	contigs_merge_contig_10391	0	1932	0.290118	-2.23677	0.212161	0.197585	0.275746	-2.33946	6	6	0.197585	contigs_merge_contig_10391	0	1932	0.275746	-2.33946	0.197585
contigs_merge_contig_10392	0.0107893	0.0107893	-0.0107893	-1.00622	0.00893963	0.00893963	-0.00893963	-1.01124	0.0340936	0.0340936	0.0340936	1.01427	3.40936e-08	1.01427	0.015544	0.987598	1	3.40936e-08	1.01427	0.015544	0.987598	1	1.7466	2.38837	0.804547	210	211	1.7466	contigs_merge_contig_10392	0	7074	2.38837	0.804547	1.7466	1.73581	2.42246	0.795607	193	193	1.73581	contigs_merge_contig_10392	0	7074	2.42246	0.795607	1.73581
contigs_merge_contig_10393	0.161273	0.161273	0.161273	#DIV/0!	#DIV/0!	0	#DIV/0!	0	0.22507	0.22507	0.22507	#DIV/0!	2.2507e-07	#DIV/0!	0.474415	0.635204	1	2.2507e-07	#DIV/0!	0.474415	0.635204	1	0	0	#DIV/0!	0	0	0	contigs_merge_contig_10393	0	789	0	#DIV/0!	0	0.161273	0.22507	-2.63242	2	2	0.161273	contigs_merge_contig_10393	0	789	0.22507	-2.63242	0.161273
contigs_merge_contig_10394	0	0	0	1	#NUM!	0	#NUM!	#NUM!	0	0	0	1	0	1	0	1	1	0	1	0	1	1	0	0	#DIV/0!	0	0	0	contigs_merge_contig_10394	0	1209	0	#DIV/0!	0	0	0	#DIV/0!	0	0	0	contigs_merge_contig_10394	0	1209	0	#DIV/0!	0
contigs_merge_contig_10395	0.392171	0.392171	-0.392171	-1.32943	0.410812	0.410812	-0.410812	-2.6335	0.50277	0.50277	-0.50277	-1.30263	-5.0277e-07	-1.30263	-0.257056	0.797136	1	-5.0277e-07	-1.30263	-0.257056	0.797136	1	1.58261	2.16412	0.662305	13	13	1.58261	contigs_merge_contig_10395	0	481	2.16412	0.662305	1.58261	1.19044	1.66135	0.251493	9	9	1.19044	contigs_merge_contig_10395	0	481	1.66135	0.251493	1.19044
contigs_merge_contig_10396	2.23258	2.23258	-2.23258	-1.0863	0.119417	0.119417	-0.119417	-1.02544	2.32488	2.32488	-2.32488	-1.06439	-2.32488e-06	-1.06439	-0.269294	0.787704	1	-2.32488e-06	-1.06439	-0.269294	0.787704	1	28.1039	38.4304	4.8127	335	347	28.1039	contigs_merge_contig_10396	0	723	38.4304	4.8127	28.1039	25.8713	36.1055	4.69328	277	294	25.8713	contigs_merge_contig_10396	0	723	36.1055	4.69328	25.8713
contigs_merge_contig_10397	0.240314	0.240314	-0.240314	#DIV/0!	#DIV/0!	0	#DIV/0!	0	0.328615	0.328615	-0.328615	#DIV/0!	-3.28615e-07	#DIV/0!	-0.57325	0.566476	1	-3.28615e-07	#DIV/0!	-0.57325	0.566476	1	0.240314	0.328615	-2.05701	3	3	0.240314	contigs_merge_contig_10397	0	731	0.328615	-2.05701	0.240314	0	0	#DIV/0!	0	0	0	contigs_merge_contig_10397	0	731	0	#DIV/0!	0
contigs_merge_contig_10398	0	0	0	1	#NUM!	0	#NUM!	#NUM!	0	0	0	1	0	1	0	1	1	0	1	0	1	1	0	0	#DIV/0!	0	0	0	contigs_merge_contig_10398	0	653	0	#DIV/0!	0	0	0	#DIV/0!	0	0	0	contigs_merge_contig_10398	0	653	0	#DIV/0!	0
contigs_merge_contig_10399	1.49036	1.49036	1.49036	5.97581	2.57913	2.57913	2.57913	-0.482886	2.08835	2.08835	2.08835	6.09879	2.08835e-06	6.09879	1.22474	0.220673	1	2.08835e-06	6.09879	1.22474	0.220674	1	0.299522	0.409578	-1.73927	4	4	0.299522	contigs_merge_contig_10399	0	782	0.409578	-1.73927	0.299522	1.78989	2.49793	0.839867	22	22	1.78989	contigs_merge_contig_10399	0	782	2.49793	0.839867	1.78989
contigs_merge_contig_104	0.232414	0.232414	-0.232414	-4.60189	2.20223	2.20223	-2.20223	-0.443036	0.315997	0.315997	-0.315997	-4.50909	-3.15997e-07	-4.50909	-0.448641	0.653691	1	-3.15997e-07	-4.50909	-0.448641	0.653691	1	0.29694	0.406048	-1.75176	4	5	0.29694	contigs_merge_contig_104	0	986	0.406048	-1.75176	0.29694	0.0645257	0.0900508	-3.95398	1	1	0.0645257	contigs_merge_contig_104	0	986	0.0900508	-3.95398	0.0645257
contigs_merge_contig_1040	1.34598	1.34598	1.34598	1.30671	0.385935	0.385935	0.385935	1.18087	2.00192	2.00192	2.00192	1.3336	2.00192e-06	1.3336	0.534962	0.592676	1	2.00192e-06	1.3336	0.534962	0.592676	1	4.38849	6.001	2.13373	676	676	4.38849	contigs_merge_contig_1040	0	9020	6.001	2.13373	4.38849	5.73447	8.00292	2.51966	813	813	5.73447	contigs_merge_contig_1040	0	9020	8.00292	2.51966	5.73447
contigs_merge_contig_10400	0	0	0	1	#NUM!	0	#NUM!	#NUM!	0	0	0	1	0	1	0	1	1	0	1	0	1	1	0	0	#DIV/0!	0	0	0	contigs_merge_contig_10400	0	544	0	#DIV/0!	0	0	0	#DIV/0!	0	0	0	contigs_merge_contig_10400	0	544	0	#DIV/0!	0
contigs_merge_contig_10401	0.196365	0.196365	0.196365	#DIV/0!	#DIV/0!	0	#DIV/0!	0	0.274044	0.274044	0.274044	#DIV/0!	2.74044e-07	#DIV/0!	0.523492	0.600632	1	2.74044e-07	#DIV/0!	0.523492	0.600632	1	0	0	#DIV/0!	0	0	0	contigs_merge_contig_10401	0	648	0	#DIV/0!	0	0.196365	0.274044	-2.34839	2	2	0.196365	contigs_merge_contig_10401	0	648	0.274044	-2.34839	0.196365
contigs_merge_contig_10402	2.22803	2.22803	2.22803	2.22526	1.15397	1.15397	1.15397	2.33765	3.16057	3.16057	3.16057	2.27105	3.16057e-06	2.27105	1.10821	0.267772	1	3.16057e-06	2.27105	1.10821	0.267772	1	1.81842	2.48658	0.862683	61	104	1.81842	contigs_merge_contig_10402	0	3349	2.48658	0.862683	1.81842	4.04645	5.64715	2.01666	122	213	4.04645	contigs_merge_contig_10402	0	3349	5.64715	2.01666	4.04645
contigs_merge_contig_10403	0.172077	0.172077	-0.172077	-2.30094	1.20223	1.20223	-1.20223	-0.588058	0.231583	0.231583	-0.231583	-2.25455	-2.31583e-07	-2.25455	-0.29878	0.765108	1	-2.31583e-07	-2.25455	-0.29878	0.765108	1	0.304348	0.416178	-1.71621	10	10	0.304348	contigs_merge_contig_10403	0	1924	0.416178	-1.71621	0.304348	0.132271	0.184595	-2.91843	4	4	0.132271	contigs_merge_contig_10403	0	1924	0.184595	-2.91843	0.132271
contigs_merge_contig_10404	0.495115	0.495115	0.495115	#DIV/0!	#DIV/0!	0	#DIV/0!	0	0.690974	0.690974	0.690974	#DIV/0!	6.90974e-07	#DIV/0!	0.831248	0.405833	1	6.90974e-07	#DIV/0!	0.831248	0.405833	1	0	0	#DIV/0!	0	0	0	contigs_merge_contig_10404	0	257	0	#DIV/0!	0	0.495115	0.690974	-1.01416	0	2	0.495115	contigs_merge_contig_10404	0	257	0.690974	-1.01416	0.495115
contigs_merge_contig_10405	0.487455	0.487455	0.487455	1.52112	0.605129	0.605129	0.605129	-5.28167	0.706607	0.706607	0.706607	1.55242	7.06607e-07	1.55242	0.391064	0.69575	1	7.06607e-07	1.55242	0.391064	0.69575	1	0.935408	1.27911	-0.0963326	10	10	0.935408	contigs_merge_contig_10405	0	626	1.27911	-0.0963326	0.935408	1.42286	1.98572	0.508797	14	14	1.42286	contigs_merge_contig_10405	0	626	1.98572	0.508797	1.42286
contigs_merge_contig_10406	0	0	0	1	#NUM!	0	#NUM!	#NUM!	0	0	0	1	0	1	0	1	1	0	1	0	1	1	0	0	#DIV/0!	0	0	0	contigs_merge_contig_10406	0	1520	0	#DIV/0!	0	0	0	#DIV/0!	0	0	0	contigs_merge_contig_10406	0	1520	0	#DIV/0!	0
contigs_merge_contig_10407	0.772525	0.772525	0.772525	1.66415	0.734785	0.734785	0.734785	4.36943	1.11085	1.11085	1.11085	1.6984	1.11085e-06	1.6984	0.536201	0.59182	1	1.11085e-06	1.6984	0.536201	0.59182	1	1.16318	1.59058	0.218074	76	79	1.16318	contigs_merge_contig_10407	0	3977	1.59058	0.218074	1.16318	1.9357	2.70143	0.952859	120	121	1.9357	contigs_merge_contig_10407	0	3977	2.70143	0.952859	1.9357
contigs_merge_contig_10408	0.0225647	0.0225647	0.0225647	1.08651	0.119703	0.119703	0.119703	0.93826	0.0388309	0.0388309	0.0388309	1.10887	3.88309e-08	1.10887	0.0447733	0.964288	1	3.88309e-08	1.10887	0.0447733	0.964288	1	0.260831	0.356671	-1.93881	2	2	0.260831	contigs_merge_contig_10408	0	449	0.356671	-1.93881	0.260831	0.283396	0.395502	-1.81911	2	2	0.283396	contigs_merge_contig_10408	0	449	0.395502	-1.81911	0.283396
contigs_merge_contig_10409	3.36674	3.36674	3.36674	1.28269	0.359168	0.359168	0.359168	1.10049	5.03371	5.03371	5.03371	1.30908	5.03371e-06	1.30908	0.820854	0.411729	1	5.03371e-06	1.30908	0.820855	0.411729	1	11.9098	16.2859	3.57408	42	72	11.9098	contigs_merge_contig_10409	0	354	16.2859	3.57408	11.9098	15.2765	21.3197	3.93325	59	85	15.2765	contigs_merge_contig_10409	0	354	21.3197	3.93325	15.2765
contigs_merge_contig_1041	0.0411291	0.0411291	-0.0411291	-1.31482	0.394871	0.394871	-0.394871	-0.865522	0.0525653	0.0525653	-0.0525653	-1.28831	-5.25653e-08	-1.28831	-0.0813811	0.935139	1	-5.25653e-08	-1.28831	-0.0813811	0.935139	1	0.17177	0.234886	-2.54145	10	10	0.17177	contigs_merge_contig_1041	0	3409	0.234886	-2.54145	0.17177	0.130641	0.182321	-2.93632	7	7	0.130641	contigs_merge_contig_1041	0	3409	0.182321	-2.93632	0.130641
contigs_merge_contig_10410	0.766534	0.766534	0.766534	#DIV/0!	#DIV/0!	0	#DIV/0!	0	1.06976	1.06976	1.06976	#DIV/0!	1.06976e-06	#DIV/0!	1.03429	0.300999	1	1.06976e-06	#DIV/0!	1.03429	0.301	1	0	0	#DIV/0!	0	0	0	contigs_merge_contig_10410	0	332	0	#DIV/0!	0	0.766534	1.06976	-0.383579	4	4	0.766534	contigs_merge_contig_10410	0	332	1.06976	-0.383579	0.766534
contigs_merge_contig_10411	0.523433	0.523433	0.523433	2.71628	1.44163	1.44163	1.44163	0.158518	0.739077	0.739077	0.739077	2.77218	7.39077e-07	2.77218	0.589254	0.555691	1	7.39077e-07	2.77218	0.589254	0.555691	1	0.304982	0.417045	-1.7132	2	2	0.304982	contigs_merge_contig_10411	0	384	0.417045	-1.7132	0.304982	0.828415	1.15612	-0.271574	5	5	0.828415	contigs_merge_contig_10411	0	384	1.15612	-0.271574	0.828415
contigs_merge_contig_10412	2.74654	2.74654	2.74654	1.48327	0.568782	0.568782	0.568782	1.2269	3.99295	3.99295	3.99295	1.5138	3.99295e-06	1.5138	0.903398	0.366314	1	3.99295e-06	1.5138	0.903399	0.366314	1	5.68324	7.77149	2.50671	37	356	5.68324	contigs_merge_contig_10412	0	3668	7.77149	2.50671	5.68324	8.42978	11.7644	3.0755	48	486	8.42978	contigs_merge_contig_10412	0	3668	11.7644	3.0755	8.42978
contigs_merge_contig_10413	0.121261	0.121261	0.121261	1.44868	0.53474	0.53474	0.53474	0.716705	0.176835	0.176835	0.176835	1.47849	1.76835e-07	1.47849	0.184769	0.85341	1	1.76835e-07	1.47849	0.184769	0.85341	1	0.270261	0.369566	-1.88758	6	6	0.270261	contigs_merge_contig_10413	0	1300	0.369566	-1.88758	0.270261	0.391522	0.546401	-1.35284	7	8	0.391522	contigs_merge_contig_10413	0	1300	0.546401	-1.35284	0.391522
contigs_merge_contig_10414	0.202617	0.202617	-0.202617	-1.84075	0.880297	0.880297	-0.880297	-0.5712	0.270284	0.270284	-0.270284	-1.80364	-2.70284e-07	-1.80364	-0.278343	0.780749	1	-2.70284e-07	-1.80364	-0.278343	0.780749	1	0.44361	0.60661	-1.17264	0	10	0.44361	contigs_merge_contig_10414	0	1320	0.60661	-1.17264	0.44361	0.240994	0.336326	-2.05293	0	5	0.240994	contigs_merge_contig_10414	0	1320	0.336326	-2.05293	0.240994
contigs_merge_contig_10415	0.0323238	0.0323238	0.0323238	2.17302	1.1197	1.1197	1.1197	0.783903	0.0458859	0.0458859	0.0458859	2.21774	4.58859e-08	2.21774	0.131778	0.89516	1	4.58859e-08	2.21774	0.131778	0.89516	1	0.027556	0.0376812	-5.18149	2	2	0.027556	contigs_merge_contig_10415	0	4250	0.0376812	-5.18149	0.027556	0.0598798	0.0835672	-4.06179	4	4	0.0598798	contigs_merge_contig_10415	0	4250	0.0835672	-4.06179	0.0598798
contigs_merge_contig_10416	0.403264	0.403264	-0.403264	-1.19649	0.258809	0.258809	-0.258809	-1.24951	0.493685	0.493685	-0.493685	-1.17236	-4.93685e-07	-1.17236	-0.197917	0.84311	1	-4.93685e-07	-1.17236	-0.197917	0.84311	1	2.4556	3.35788	1.29607	13	13	2.4556	contigs_merge_contig_10416	0	310	3.35788	1.29607	2.4556	2.05233	2.8642	1.03726	10	10	2.05233	contigs_merge_contig_10416	0	310	2.8642	1.03726	2.05233
contigs_merge_contig_10417	0.150182	0.150182	0.150182	3.25953	1.70467	1.70467	1.70467	0.564163	0.211462	0.211462	0.211462	3.32661	2.11462e-07	3.32661	0.337213	0.735957	1	2.11462e-07	3.32661	0.337213	0.735957	1	0.066466	0.0908883	-3.91124	2	2	0.066466	contigs_merge_contig_10417	0	1762	0.0908883	-3.91124	0.066466	0.216648	0.30235	-2.20658	6	6	0.216648	contigs_merge_contig_10417	0	1762	0.30235	-2.20658	0.216648
contigs_merge_contig_10418	0.0912095	0.0912095	-0.0912095	#DIV/0!	#DIV/0!	0	#DIV/0!	0	0.124724	0.124724	-0.124724	#DIV/0!	-1.24724e-07	#DIV/0!	-0.353162	0.723967	1	-1.24724e-07	#DIV/0!	-0.353162	0.723967	1	0.0912095	0.124724	-3.45467	1	1	0.0912095	contigs_merge_contig_10418	0	642	0.124724	-3.45467	0.0912095	0	0	#DIV/0!	0	0	0	contigs_merge_contig_10418	0	642	0	#DIV/0!	0
contigs_merge_contig_10419	0	0	0	1	#NUM!	0	#NUM!	#NUM!	0	0	0	1	0	1	0	1	1	0	1	0	1	1	0	0	#DIV/0!	0	0	0	contigs_merge_contig_10419	0	226	0	#DIV/0!	0	0	0	#DIV/0!	0	0	0	contigs_merge_contig_10419	0	226	0	#DIV/0!	0
contigs_merge_contig_1042	0.079519	0.079519	0.079519	1.62977	0.704665	0.704665	0.704665	0.763967	0.114528	0.114528	0.114528	1.66331	1.14528e-07	1.66331	0.16889	0.865883	1	1.14528e-07	1.66331	0.16889	0.865883	1	0.126267	0.172663	-2.98545	3	4	0.126267	contigs_merge_contig_1042	0	1855	0.172663	-2.98545	0.126267	0.205786	0.287192	-2.28078	4	6	0.205786	contigs_merge_contig_1042	0	1855	0.287192	-2.28078	0.205786
contigs_merge_contig_10420	0.0192176	0.0192176	0.0192176	1.00068	0.000984021	0.000984021	0.000984021	1.0002	0.819433	0.819433	0.819433	1.02128	8.19433e-07	1.02128	0.0928739	0.926004	1	8.19433e-07	1.02128	0.0928739	0.926004	1	28.1658	38.515	4.81587	547	557	28.1658	contigs_merge_contig_10420	0	1158	38.515	4.81587	28.1658	28.185	39.3345	4.81686	505	513	28.185	contigs_merge_contig_10420	0	1158	39.3345	4.81686	28.185
contigs_merge_contig_10421	0.061373	0.061373	-0.061373	-1.26552	0.339729	0.339729	-0.339729	-0.83923	0.0774194	0.0774194	-0.0774194	-1.24	-7.74194e-08	-1.24	-0.0910766	0.927432	1	-7.74194e-08	-1.24	-0.0910766	0.927432	1	0.292517	0.399999	-1.77341	7	11	0.292517	contigs_merge_contig_10421	0	2202	0.399999	-1.77341	0.292517	0.231144	0.32258	-2.11314	4	8	0.231144	contigs_merge_contig_10421	0	2202	0.32258	-2.11314	0.231144
contigs_merge_contig_10422	1.84619	1.84619	1.84619	3.25953	1.70467	1.70467	1.70467	-4.84846	2.5995	2.5995	2.5995	3.32661	2.5995e-06	3.32661	1.18232	0.23708	1	2.5995e-06	3.32661	1.18232	0.23708	1	0.817068	1.11729	-0.291472	3	3	0.817068	contigs_merge_contig_10422	0	215	1.11729	-0.291472	0.817068	2.66326	3.7168	1.41319	7	9	2.66326	contigs_merge_contig_10422	0	215	3.7168	1.41319	2.66326
contigs_merge_contig_10423	0.0821477	0.0821477	0.0821477	1.08651	0.119703	0.119703	0.119703	-0.603284	0.141365	0.141365	0.141365	1.10887	1.41365e-07	1.10887	0.0854283	0.931921	1	1.41365e-07	1.10887	0.0854283	0.931921	1	0.949565	1.29847	-0.0746608	6	6	0.949565	contigs_merge_contig_10423	0	370	1.29847	-0.0746608	0.949565	1.03171	1.43984	0.0450417	6	6	1.03171	contigs_merge_contig_10423	0	370	1.43984	0.0450417	1.03171
contigs_merge_contig_10424	3.27938	3.27938	3.27938	9.43906	3.23864	3.23864	3.23864	-1.37497	4.58758	4.58758	4.58758	9.63331	4.58758e-06	9.63331	1.92995	0.0536125	1	4.58758e-06	9.63331	1.92996	0.0536125	1	0.388596	0.531382	-1.36366	16	16	0.388596	contigs_merge_contig_10424	0	2411	0.531382	-1.36366	0.388596	3.66798	5.11897	1.87499	139	139	3.66798	contigs_merge_contig_10424	0	2411	5.11897	1.87499	3.66798
contigs_merge_contig_10425	0	0	0	1	#NUM!	0	#NUM!	#NUM!	0	0	0	1	0	1	0	1	1	0	1	0	1	1	0	0	#DIV/0!	0	0	0	contigs_merge_contig_10425	0	463	0	#DIV/0!	0	0	0	#DIV/0!	0	0	0	contigs_merge_contig_10425	0	463	0	#DIV/0!	0
contigs_merge_contig_10426	0.808753	0.808753	0.808753	7.82288	2.9677	2.9677	2.9677	0.0353993	1.13202	1.13202	1.13202	7.98387	1.13202e-06	7.98387	0.938086	0.3482	1	1.13202e-06	7.98387	0.938087	0.3482	1	0.118535	0.16209	-3.07661	5	5	0.118535	contigs_merge_contig_10426	0	2470	0.16209	-3.07661	0.118535	0.927289	1.29411	-0.10891	36	36	0.927289	contigs_merge_contig_10426	0	2470	1.29411	-0.10891	0.927289
contigs_merge_contig_10427	0.162569	0.162569	-0.162569	-1.23676	0.306562	0.306562	-0.306562	-0.434758	0.20298	0.20298	-0.20298	-1.21182	-2.0298e-07	-1.21182	-0.139423	0.889116	1	-2.0298e-07	-1.21182	-0.139423	0.889116	1	0.849218	1.16125	-0.235794	6	43	0.849218	contigs_merge_contig_10427	0	2965	1.16125	-0.235794	0.849218	0.686649	0.958274	-0.542356	6	32	0.686649	contigs_merge_contig_10427	0	2965	0.958274	-0.542356	0.686649
contigs_merge_contig_10428	0.695296	0.695296	0.695296	1.33279	0.414446	0.414446	0.414446	1.38987	1.02914	1.02914	1.02914	1.36021	1.02914e-06	1.36021	0.396317	0.691871	1	1.02914e-06	1.36021	0.396317	0.691872	1	2.08931	2.85701	1.06303	75	75	2.08931	contigs_merge_contig_10428	0	2102	2.85701	1.06303	2.08931	2.78461	3.88615	1.47748	92	92	2.78461	contigs_merge_contig_10428	0	2102	3.88615	1.47748	2.78461
contigs_merge_contig_10429	0	0	0	1	#NUM!	0	#NUM!	#NUM!	0	0	0	1	0	1	0	1	1	0	1	0	1	1	0	0	#DIV/0!	0	0	0	contigs_merge_contig_10429	0	478	0	#DIV/0!	0	0	0	#DIV/0!	0	0	0	contigs_merge_contig_10429	0	478	0	#DIV/0!	0
contigs_merge_contig_1043	0.173538	0.173538	0.173538	1.62977	0.704665	0.704665	0.704665	0.621058	0.249942	0.249942	0.249942	1.66331	2.49942e-07	1.66331	0.249497	0.802976	1	2.49942e-07	1.66331	0.249497	0.802976	1	0.27556	0.376812	-1.85956	4	4	0.27556	contigs_merge_contig_1043	0	850	0.376812	-1.85956	0.27556	0.449099	0.626754	-1.1549	6	6	0.449099	contigs_merge_contig_1043	0	850	0.626754	-1.1549	0.449099
contigs_merge_contig_10430	0.142651	0.142651	0.142651	#DIV/0!	#DIV/0!	0	#DIV/0!	0	0.199081	0.199081	0.199081	#DIV/0!	1.99081e-07	#DIV/0!	0.446185	0.655464	1	1.99081e-07	#DIV/0!	0.446185	0.655464	1	0	0	#DIV/0!	0	0	0	contigs_merge_contig_10430	0	446	0	#DIV/0!	0	0.142651	0.199081	-2.80944	1	1	0.142651	contigs_merge_contig_10430	0	446	0.199081	-2.80944	0.142651
contigs_merge_contig_10431	0.738867	0.738867	0.738867	2.53519	1.34209	1.34209	1.34209	-0.272089	1.04469	1.04469	1.04469	2.58736	1.04469e-06	2.58736	0.6799	0.496568	1	1.04469e-06	2.58736	0.6799	0.496568	1	0.481287	0.658131	-1.05503	3	3	0.481287	contigs_merge_contig_10431	0	365	0.658131	-1.05503	0.481287	1.22015	1.70282	0.287063	6	7	1.22015	contigs_merge_contig_10431	0	365	1.70282	0.287063	1.22015
contigs_merge_contig_10432	0.130784	0.130784	-0.130784	-1.84075	0.880297	0.880297	-0.880297	-0.672081	0.174462	0.174462	-0.174462	-1.80364	-1.74462e-07	-1.80364	-0.223625	0.823049	1	-1.74462e-07	-1.80364	-0.223625	0.823049	1	0.28634	0.391553	-1.8042	2	2	0.28634	contigs_merge_contig_10432	0	409	0.391553	-1.8042	0.28634	0.155556	0.217091	-2.6845	1	1	0.155556	contigs_merge_contig_10432	0	409	0.217091	-2.6845	0.155556
contigs_merge_contig_10433	1.01262	1.01262	1.01262	1.84848	0.886339	0.886339	0.886339	4.47396	1.44678	1.44678	1.44678	1.88652	1.44678e-06	1.88652	0.666589	0.505035	1	1.44678e-06	1.88652	0.666589	0.505035	1	1.19345	1.63197	0.255138	58	77	1.19345	contigs_merge_contig_10433	0	3778	1.63197	0.255138	1.19345	2.20607	3.07875	1.14148	97	131	2.20607	contigs_merge_contig_10433	0	3778	3.07875	1.14148	2.20607
contigs_merge_contig_10434	0.0465906	0.0465906	-0.0465906	-1.07906	0.109779	0.109779	-0.109779	-0.856115	0.0471269	0.0471269	-0.0471269	-1.0573	-4.71269e-08	-1.0573	-0.036231	0.971098	1	-4.71269e-08	-1.0573	-0.036231	0.971098	1	0.635874	0.86952	-0.653187	14	34	0.635874	contigs_merge_contig_10434	0	3131	0.86952	-0.653187	0.635874	0.589284	0.822393	-0.762966	16	29	0.589284	contigs_merge_contig_10434	0	3131	0.822393	-0.762966	0.589284
contigs_merge_contig_10435	0.351909	0.351909	0.351909	3.80279	1.92706	1.92706	1.92706	0.356272	0.494651	0.494651	0.494651	3.88105	4.94651e-07	3.88105	0.540341	0.588962	1	4.94651e-07	3.88105	0.540341	0.588962	1	0.125557	0.171691	-2.99359	8	8	0.125557	contigs_merge_contig_10435	0	3731	0.171691	-2.99359	0.125557	0.477466	0.666342	-1.06653	28	28	0.477466	contigs_merge_contig_10435	0	3731	0.666342	-1.06653	0.477466
contigs_merge_contig_10436	0.489512	0.489512	-0.489512	-1.89828	0.924692	0.924692	-0.924692	0.0558033	0.654043	0.654043	-0.654043	-1.86	-6.54043e-07	-1.86	-0.443476	0.657422	1	-6.54043e-07	-1.86	-0.443476	0.657422	1	1.03446	1.41456	0.0488735	33	33	1.03446	contigs_merge_contig_10436	0	1868	1.41456	0.0488735	1.03446	0.544945	0.760515	-0.875818	16	16	0.544945	contigs_merge_contig_10436	0	1868	0.760515	-0.875818	0.544945
contigs_merge_contig_10437	4.70348	4.70348	4.70348	2.1065	1.07485	1.07485	1.07485	1.51484	6.68371	6.68371	6.68371	2.14985	6.68371e-06	2.14985	1.56202	0.118283	1	6.68371e-06	2.14985	1.56202	0.118283	1	4.25077	5.81268	2.08772	49	49	4.25077	contigs_merge_contig_10437	0	675	5.81268	2.08772	4.25077	8.95425	12.4964	3.16257	95	95	8.95425	contigs_merge_contig_10437	0	675	12.4964	3.16257	8.95425
contigs_merge_contig_10438	0.0661516	0.0661516	0.0661516	1.44868	0.53474	0.53474	0.53474	0.806383	0.0964689	0.0964689	0.0964689	1.47849	9.64689e-08	1.47849	0.13647	0.89145	1	9.64689e-08	1.47849	0.13647	0.89145	1	0.147436	0.201609	-2.76184	0	6	0.147436	contigs_merge_contig_10438	0	2383	0.201609	-2.76184	0.147436	0.213587	0.298078	-2.2271	2	8	0.213587	contigs_merge_contig_10438	0	2383	0.298078	-2.2271	0.213587
contigs_merge_contig_10439	0.986589	0.986589	0.986589	1.90139	0.927057	0.927057	0.927057	8.11528	1.40767	1.40767	1.40767	1.94052	1.40767e-06	1.94052	0.671	0.50222	1	1.40767e-06	1.94052	0.671	0.50222	1	1.09451	1.49668	0.130291	4	4	1.09451	contigs_merge_contig_10439	0	214	1.49668	0.130291	1.09451	2.0811	2.90435	1.05735	7	7	2.0811	contigs_merge_contig_10439	0	214	2.90435	1.05735	2.0811
contigs_merge_contig_1044	1.37565	1.37565	1.37565	1.41278	0.498533	0.498533	0.498533	1.28706	2.01362	2.01362	2.01362	1.44185	2.01362e-06	1.44185	0.603626	0.546092	1	2.01362e-06	1.44185	0.603626	0.546092	1	3.33268	4.55724	1.73668	605	696	3.33268	contigs_merge_contig_1044	0	12229	4.55724	1.73668	3.33268	4.70833	6.57086	2.23522	775	905	4.70833	contigs_merge_contig_1044	0	12229	6.57086	2.23522	4.70833
contigs_merge_contig_10440	0	0	0	1	#NUM!	0	#NUM!	#NUM!	0	0	0	1	0	1	0	1	1	0	1	0	1	1	0	0	#DIV/0!	0	0	0	contigs_merge_contig_10440	0	2260	0	#DIV/0!	0	0	0	#DIV/0!	0	0	0	contigs_merge_contig_10440	0	2260	0	#DIV/0!	0
contigs_merge_contig_10441	0.891513	0.891513	-0.891513	-1.84075	0.880297	0.880297	-0.880297	-11.4091	1.18925	1.18925	-1.18925	-1.80364	-1.18925e-06	-1.80364	-0.583857	0.559317	1	-1.18925e-06	-1.80364	-0.583857	0.559317	1	1.95188	2.66909	0.964868	10	10	1.95188	contigs_merge_contig_10441	0	300	2.66909	0.964868	1.95188	1.06037	1.47984	0.0845701	5	5	1.06037	contigs_merge_contig_10441	0	300	1.47984	0.0845701	1.06037
contigs_merge_contig_10442	0.685142	0.685142	-0.685142	-1.33873	0.420866	0.420866	-0.420866	-1.41413	0.879971	0.879971	-0.879971	-1.31174	-8.79971e-07	-1.31174	-0.344476	0.730488	1	-8.79971e-07	-1.31174	-0.344476	0.730488	1	2.70782	3.70278	1.43713	16	16	2.70782	contigs_merge_contig_10442	0	346	3.70278	1.43713	2.70782	2.02267	2.82281	1.01626	11	11	2.02267	contigs_merge_contig_10442	0	346	2.82281	1.01626	2.02267
contigs_merge_contig_10443	3.12506	3.12506	3.12506	3.44579	1.78484	1.78484	1.78484	6.04786	4.39723	4.39723	4.39723	3.5167	4.39723e-06	3.5167	1.56529	0.117514	1	4.39723e-06	3.5167	1.56529	0.117514	1	1.27773	1.74722	0.353583	35	35	1.27773	contigs_merge_contig_10443	0	1604	1.74722	0.353583	1.27773	4.40279	6.14445	2.13842	111	111	4.40279	contigs_merge_contig_10443	0	1604	6.14445	2.13842	4.40279
contigs_merge_contig_10444	0.731033	0.731033	0.731033	1.71554	0.778666	0.778666	0.778666	26.2017	1.04897	1.04897	1.04897	1.75085	1.04897e-06	1.75085	0.535086	0.59259	1	1.04897e-06	1.75085	0.535086	0.59259	1	1.02165	1.39704	0.0308974	19	19	1.02165	contigs_merge_contig_10444	0	1089	1.39704	0.0308974	1.02165	1.75268	2.44601	0.809563	30	30	1.75268	contigs_merge_contig_10444	0	1089	2.44601	0.809563	1.75268
contigs_merge_contig_10445	0	0	0	1	#NUM!	0	#NUM!	#NUM!	0	0	0	1	0	1	0	1	1	0	1	0	1	1	0	0	#DIV/0!	0	0	0	contigs_merge_contig_10445	0	3438	0	#DIV/0!	0	0	0	#DIV/0!	0	0	0	contigs_merge_contig_10445	0	3438	0	#DIV/0!	0
contigs_merge_contig_10446	0	0	0	1	#NUM!	0	#NUM!	#NUM!	0	0	0	1	0	1	0	1	1	0	1	0	1	1	0	0	#DIV/0!	0	0	0	contigs_merge_contig_10446	0	474	0	#DIV/0!	0	0	0	#DIV/0!	0	0	0	contigs_merge_contig_10446	0	474	0	#DIV/0!	0
contigs_merge_contig_10447	0.0108475	0.0108475	0.0108475	1.08651	0.119703	0.119703	0.119703	0.960039	0.0186671	0.0186671	0.0186671	1.10887	1.86671e-08	1.10887	0.0310433	0.975235	1	1.86671e-08	1.10887	0.0310433	0.975235	1	0.125389	0.171462	-2.99552	2	2	0.125389	contigs_merge_contig_10447	0	934	0.171462	-2.99552	0.125389	0.136236	0.190129	-2.87582	2	2	0.136236	contigs_merge_contig_10447	0	934	0.190129	-2.87582	0.136236
contigs_merge_contig_10448	0.159454	0.159454	0.159454	#DIV/0!	#DIV/0!	0	#DIV/0!	0	0.222532	0.222532	0.222532	#DIV/0!	2.22532e-07	#DIV/0!	0.471733	0.637118	1	2.22532e-07	#DIV/0!	0.471733	0.637118	1	0	0	#DIV/0!	0	0	0	contigs_merge_contig_10448	0	399	0	#DIV/0!	0	0.159454	0.222532	-2.64878	1	1	0.159454	contigs_merge_contig_10448	0	399	0.222532	-2.64878	0.159454
contigs_merge_contig_10449	13.2159	13.2159	13.2159	2.1332	1.09302	1.09302	1.09302	1.30843	18.7721	18.7721	18.7721	2.1771	1.87721e-05	2.1771	2.63726	0.00835784	0.699066	1.87721e-05	2.1771	2.63727	0.0083578	0.699063	11.6625	15.9477	3.5438	220	382	11.6625	contigs_merge_contig_10449	0	1918	15.9477	3.5438	11.6625	24.8784	34.7198	4.63682	193	750	24.8784	contigs_merge_contig_10449	0	1918	34.7198	4.63682	24.8784
contigs_merge_contig_1045	0.20913	0.20913	-0.20913	#DIV/0!	#DIV/0!	0	#DIV/0!	0	0.285973	0.285973	-0.285973	#DIV/0!	-2.85973e-07	#DIV/0!	-0.534765	0.592812	1	-2.85973e-07	#DIV/0!	-0.534765	0.592813	1	0.20913	0.285973	-2.25752	0	1	0.20913	contigs_merge_contig_1045	0	280	0.285973	-2.25752	0.20913	0	0	#DIV/0!	0	0	0	contigs_merge_contig_1045	0	280	0	#DIV/0!	0
contigs_merge_contig_10450	0	0	0	1	#NUM!	0	#NUM!	#NUM!	0	0	0	1	0	1	0	1	1	0	1	0	1	1	0	0	#DIV/0!	0	0	0	contigs_merge_contig_10450	0	971	0	#DIV/0!	0	0	0	#DIV/0!	0	0	0	contigs_merge_contig_10450	0	971	0	#DIV/0!	0
contigs_merge_contig_10451	0.314884	0.314884	0.314884	1.90139	0.927057	0.927057	0.927057	0.389023	0.449277	0.449277	0.449277	1.94052	4.49277e-07	1.94052	0.379079	0.704629	1	4.49277e-07	1.94052	0.379079	0.704629	1	0.349331	0.477689	-1.51734	8	8	0.349331	contigs_merge_contig_10451	0	1341	0.477689	-1.51734	0.349331	0.664215	0.926966	-0.590278	14	14	0.664215	contigs_merge_contig_10451	0	1341	0.926966	-0.590278	0.664215
contigs_merge_contig_10452	0.134565	0.134565	0.134565	#DIV/0!	#DIV/0!	0	#DIV/0!	0	0.187796	0.187796	0.187796	#DIV/0!	1.87796e-07	#DIV/0!	0.433355	0.664757	1	1.87796e-07	#DIV/0!	0.433355	0.664757	1	0	0	#DIV/0!	0	0	0	contigs_merge_contig_10452	0	2364	0	#DIV/0!	0	0.134565	0.187796	-2.89363	5	5	0.134565	contigs_merge_contig_10452	0	2364	0.187796	-2.89363	0.134565
contigs_merge_contig_10453	5.80369	5.80369	5.80369	1.38355	0.468379	0.468379	0.468379	1.1195	8.52533	8.52533	8.52533	1.41203	8.52533e-06	1.41203	1.20679	0.227512	1	8.52533e-06	1.41203	1.20679	0.227512	1	15.1313	20.6912	3.91947	330	684	15.1313	contigs_merge_contig_10453	0	2647	20.6912	3.91947	15.1313	20.935	29.2165	4.38785	429	871	20.935	contigs_merge_contig_10453	0	2647	29.2165	4.38785	20.935
contigs_merge_contig_10454	0	0	0	1	#NUM!	0	#NUM!	#NUM!	0	0	0	1	0	1	0	1	1	0	1	0	1	1	0	0	#DIV/0!	0	0	0	contigs_merge_contig_10454	0	410	0	#DIV/0!	0	0	0	#DIV/0!	0	0	0	contigs_merge_contig_10454	0	410	0	#DIV/0!	0
contigs_merge_contig_10455	1.41793	1.41793	1.41793	1.25459	0.327216	0.327216	0.327216	1.13207	2.13557	2.13557	2.13557	1.28041	2.13557e-06	1.28041	0.512446	0.608339	1	2.13557e-06	1.28041	0.512446	0.608339	1	5.56949	7.61594	2.47754	181	181	5.56949	contigs_merge_contig_10455	0	1903	7.61594	2.47754	5.56949	6.98742	9.75151	2.80476	209	209	6.98742	contigs_merge_contig_10455	0	1903	9.75151	2.80476	6.98742
contigs_merge_contig_10456	0.639768	0.639768	0.639768	2.58046	1.36763	1.36763	1.36763	-0.0482119	0.90424	0.90424	0.90424	2.63357	9.0424e-07	2.63357	0.637594	0.523738	1	9.0424e-07	2.63357	0.637594	0.523738	1	0.404798	0.553537	-1.30473	32	32	0.404798	contigs_merge_contig_10456	0	4629	0.553537	-1.30473	0.404798	1.04457	1.45778	0.0629033	76	76	1.04457	contigs_merge_contig_10456	0	4629	1.45778	0.0629033	1.04457
contigs_merge_contig_10457	0.413653	0.413653	0.413653	1.11132	0.15227	0.15227	0.15227	1.08041	0.681858	0.681858	0.681858	1.13419	6.81858e-07	1.13419	0.207056	0.835966	1	6.81858e-07	1.13419	0.207056	0.835966	1	3.71599	5.08139	1.89375	98	219	3.71599	contigs_merge_contig_10457	0	3451	5.08139	1.89375	3.71599	4.12964	5.76325	2.04602	112	224	4.12964	contigs_merge_contig_10457	0	3451	5.76325	2.04602	4.12964
contigs_merge_contig_10458	0.028333	0.028333	-0.028333	-1.61066	0.687652	0.687652	-0.687652	-0.844767	0.037438	0.037438	-0.037438	-1.57818	-3.7438e-08	-1.57818	-0.0916288	0.926993	1	-3.7438e-08	-1.57818	-0.0916288	0.926993	1	0.0747303	0.102189	-3.74216	7	7	0.0747303	contigs_merge_contig_10458	0	5485	0.102189	-3.74216	0.0747303	0.0463973	0.0647512	-4.42982	4	4	0.0463973	contigs_merge_contig_10458	0	5485	0.0647512	-4.42982	0.0463973
contigs_merge_contig_10459	0.112285	0.112285	-0.112285	#DIV/0!	#DIV/0!	0	#DIV/0!	0	0.153543	0.153543	-0.153543	#DIV/0!	-1.53543e-07	#DIV/0!	-0.391845	0.695172	1	-1.53543e-07	#DIV/0!	-0.391845	0.695173	1	0.112285	0.153543	-3.15477	2	2	0.112285	contigs_merge_contig_10459	0	1043	0.153543	-3.15477	0.112285	0	0	#DIV/0!	0	0	0	contigs_merge_contig_10459	0	1043	0	#DIV/0!	0
contigs_merge_contig_1046	62.4982	62.4982	62.4982	1.10888	0.149102	0.149102	0.149102	1.01627	103.375	103.375	103.375	1.1317	0.000103375	1.1317	2.52824	0.0114637	0.890986	0.000103375	1.1317	2.52824	0.0114637	0.890986	574.013	784.929	9.16494	2733	4323	574.013	contigs_merge_contig_1046	0	441	784.929	9.16494	574.013	636.512	888.304	9.31404	2856	4412	636.512	contigs_merge_contig_1046	0	441	888.304	9.31404	636.512
contigs_merge_contig_10460	0.0148769	0.0148769	-0.0148769	-1.07377	0.10269	0.10269	-0.10269	-0.955546	0.0146684	0.0146684	-0.0146684	-1.05212	-1.46684e-08	-1.05212	-0.0193019	0.9846	1	-1.46684e-08	-1.05212	-0.0193019	0.9846	1	0.216532	0.296095	-2.20735	3	7	0.216532	contigs_merge_contig_10460	0	1893	0.296095	-2.20735	0.216532	0.201655	0.281427	-2.31004	3	6	0.201655	contigs_merge_contig_10460	0	1893	0.281427	-2.31004	0.201655
contigs_merge_contig_10461	0.240874	0.240874	-0.240874	-1.20357	0.267321	0.267321	-0.267321	-2.10121	0.296083	0.296083	-0.296083	-1.1793	-2.96083e-07	-1.1793	-0.156078	0.875972	1	-2.96083e-07	-1.1793	-0.156078	0.875972	1	1.42412	1.9474	0.510072	6	17	1.42412	contigs_merge_contig_10461	0	699	1.9474	0.510072	1.42412	1.18325	1.65132	0.242752	6	13	1.18325	contigs_merge_contig_10461	0	699	1.65132	0.242752	1.18325
contigs_merge_contig_10462	0.305401	0.305401	0.305401	1.08651	0.119703	0.119703	0.119703	1.06578	0.525555	0.525555	0.525555	1.10887	5.25555e-07	1.10887	0.164718	0.869166	1	5.25555e-07	1.10887	0.164718	0.869166	1	3.5302	4.82734	1.81975	60	63	3.5302	contigs_merge_contig_10462	0	1045	4.82734	1.81975	3.5302	3.8356	5.3529	1.93945	61	63	3.8356	contigs_merge_contig_10462	0	1045	5.3529	1.93945	3.8356
contigs_merge_contig_10463	3.80956	3.80956	-3.80956	-1.19203	0.253421	0.253421	-0.253421	-1.0588	4.65107	4.65107	-4.65107	-1.16799	-4.65107e-06	-1.16799	-0.600345	0.548276	1	-4.65107e-06	-1.16799	-0.600345	0.548276	1	23.6478	32.337	4.56364	294	294	23.6478	contigs_merge_contig_10463	0	728	32.337	4.56364	23.6478	19.8383	27.6859	4.31021	227	227	19.8383	contigs_merge_contig_10463	0	728	27.6859	4.31021	19.8383
contigs_merge_contig_10464	0.24424	0.24424	-0.24424	#DIV/0!	#DIV/0!	0	#DIV/0!	0	0.333984	0.333984	-0.333984	#DIV/0!	-3.33984e-07	#DIV/0!	-0.577913	0.563323	1	-3.33984e-07	#DIV/0!	-0.577913	0.563323	1	0.24424	0.333984	-2.03363	4	4	0.24424	contigs_merge_contig_10464	0	959	0.333984	-2.03363	0.24424	0	0	#DIV/0!	0	0	0	contigs_merge_contig_10464	0	959	0	#DIV/0!	0
contigs_merge_contig_10465	0	0	0	1	#NUM!	0	#NUM!	#NUM!	0	0	0	1	0	1	0	1	1	0	1	0	1	1	0	0	#DIV/0!	0	0	0	contigs_merge_contig_10465	0	236	0	#DIV/0!	0	0	0	#DIV/0!	0	0	0	contigs_merge_contig_10465	0	236	0	#DIV/0!	0
contigs_merge_contig_10466	3.28946	3.28946	-3.28946	-1.05673	0.0796063	0.0796063	-0.0796063	-1.01359	2.86639	2.86639	-2.86639	-1.03542	-2.86639e-06	-1.03542	-0.223353	0.823261	1	-2.86639e-06	-1.03542	-0.223353	0.823261	1	61.2743	83.789	5.93721	248	248	61.2743	contigs_merge_contig_10466	0	237	83.789	5.93721	61.2743	57.9849	80.9226	5.8576	216	216	57.9849	contigs_merge_contig_10466	0	237	80.9226	5.8576	57.9849
contigs_merge_contig_10467	0.566911	0.566911	-0.566911	-2.30094	1.20223	1.20223	-1.20223	0.00322245	0.762954	0.762954	-0.762954	-2.25455	-7.62954e-07	-2.25455	-0.54231	0.587605	1	-7.62954e-07	-2.25455	-0.54231	0.587605	1	1.00268	1.37111	0.00386167	5	5	1.00268	contigs_merge_contig_10467	0	292	1.37111	0.00386167	1.00268	0.435769	0.608151	-1.19836	2	2	0.435769	contigs_merge_contig_10467	0	292	0.608151	-1.19836	0.435769
contigs_merge_contig_10468	0	0	0	1	#NUM!	0	#NUM!	#NUM!	0	0	0	1	0	1	0	1	1	0	1	0	1	1	0	0	#DIV/0!	0	0	0	contigs_merge_contig_10468	0	418	0	#DIV/0!	0	0	0	#DIV/0!	0	0	0	contigs_merge_contig_10468	0	418	0	#DIV/0!	0
contigs_merge_contig_10469	0.514868	0.514868	0.514868	3.02671	1.59775	1.59775	1.59775	0.191776	0.725689	0.725689	0.725689	3.089	7.25689e-07	3.089	0.608886	0.5426	1	7.25689e-07	3.089	0.608886	0.5426	1	0.254041	0.347386	-1.97686	14	14	0.254041	contigs_merge_contig_10469	0	3227	0.347386	-1.97686	0.254041	0.768909	1.07308	-0.379115	39	39	0.768909	contigs_merge_contig_10469	0	3227	1.07308	-0.379115	0.768909
contigs_merge_contig_1047	0.7242	0.7242	0.7242	#DIV/0!	#DIV/0!	0	#DIV/0!	0	1.01068	1.01068	1.01068	#DIV/0!	1.01068e-06	#DIV/0!	1.00533	0.31474	1	1.01068e-06	#DIV/0!	1.00533	0.31474	1	0	0	#DIV/0!	0	0	0	contigs_merge_contig_1047	0	2372	0	#DIV/0!	0	0.7242	1.01068	-0.46554	6	27	0.7242	contigs_merge_contig_1047	0	2372	1.01068	-0.46554	0.7242
contigs_merge_contig_10470	0.0579174	0.0579174	0.0579174	#DIV/0!	#DIV/0!	0	#DIV/0!	0	0.0808285	0.0808285	0.0808285	#DIV/0!	8.08285e-08	#DIV/0!	0.284304	0.776178	1	8.08285e-08	#DIV/0!	0.284304	0.776178	1	0	0	#DIV/0!	0	0	0	contigs_merge_contig_10470	0	2197	0	#DIV/0!	0	0.0579174	0.0808285	-4.10986	0	2	0.0579174	contigs_merge_contig_10470	0	2197	0.0808285	-4.10986	0.0579174
contigs_merge_contig_10471	0.099524	0.099524	0.099524	1.08651	0.119703	0.119703	0.119703	1.5921	0.171268	0.171268	0.171268	1.10887	1.71268e-07	1.10887	0.0940304	0.925085	1	1.71268e-07	1.10887	0.0940304	0.925085	1	1.15042	1.57313	0.202164	6	10	1.15042	contigs_merge_contig_10471	0	509	1.57313	0.202164	1.15042	1.24995	1.7444	0.321867	10	10	1.24995	contigs_merge_contig_10471	0	509	1.7444	0.321867	1.24995
contigs_merge_contig_10472	0.124323	0.124323	0.124323	#DIV/0!	#DIV/0!	0	#DIV/0!	0	0.173503	0.173503	0.173503	#DIV/0!	1.73503e-07	#DIV/0!	0.416537	0.677017	1	1.73503e-07	#DIV/0!	0.416537	0.677017	1	0	0	#DIV/0!	0	0	0	contigs_merge_contig_10472	0	4094	0	#DIV/0!	0	0.124323	0.173503	-3.00783	8	8	0.124323	contigs_merge_contig_10472	0	4094	0.173503	-3.00783	0.124323
contigs_merge_contig_10473	0	0	0	1	#NUM!	0	#NUM!	#NUM!	0	0	0	1	0	1	0	1	1	0	1	0	1	1	0	0	#DIV/0!	0	0	0	contigs_merge_contig_10473	0	538	0	#DIV/0!	0	0	0	#DIV/0!	0	0	0	contigs_merge_contig_10473	0	538	0	#DIV/0!	0
contigs_merge_contig_10474	0.131923	0.131923	0.131923	1.49395	0.579134	0.579134	0.579134	0.695941	0.191625	0.191625	0.191625	1.5247	1.91625e-07	1.5247	0.199561	0.841824	1	1.91625e-07	1.5247	0.199561	0.841824	1	0.267077	0.365211	-1.90467	3	8	0.267077	contigs_merge_contig_10474	0	1754	0.365211	-1.90467	0.267077	0.399	0.556836	-1.32554	4	11	0.399	contigs_merge_contig_10474	0	1754	0.556836	-1.32554	0.399
contigs_merge_contig_10475	1.12603	1.12603	1.12603	1.97547	0.982199	0.982199	0.982199	5.74335	1.60395	1.60395	1.60395	2.01613	1.60395e-06	2.01613	0.735098	0.46228	1	1.60395e-06	2.01613	0.735098	0.46228	1	1.15434	1.57849	0.207068	31	33	1.15434	contigs_merge_contig_10475	0	1674	1.57849	0.207068	1.15434	2.28037	3.18244	1.18927	56	60	2.28037	contigs_merge_contig_10475	0	1674	3.18244	1.18927	2.28037
contigs_merge_contig_10476	0	0	0	1	#NUM!	0	#NUM!	#NUM!	0	0	0	1	0	1	0	1	1	0	1	0	1	1	0	0	#DIV/0!	0	0	0	contigs_merge_contig_10476	0	290	0	#DIV/0!	0	0	0	#DIV/0!	0	0	0	contigs_merge_contig_10476	0	290	0	#DIV/0!	0
contigs_merge_contig_10477	19.9093	19.9093	19.9093	22.8167	4.51202	4.51202	4.51202	-33.1835	27.8107	27.8107	27.8107	23.2863	2.78107e-05	23.2863	5.05182	4.3763e-07	0.000118911	2.78107e-05	23.2863	5.05185	4.37626e-07	0.000118901	0.912569	1.24788	-0.131994	12	12	0.912569	contigs_merge_contig_10477	0	770	1.24788	-0.131994	0.912569	20.8218	29.0586	4.38003	251	252	20.8218	contigs_merge_contig_10477	0	770	29.0586	4.38003	20.8218
contigs_merge_contig_10478	1.33058	1.33058	1.33058	4.57887	2.19499	2.19499	2.19499	-0.537701	1.86739	1.86739	1.86739	4.6731	1.86739e-06	4.6731	1.09957	0.271518	1	1.86739e-06	4.6731	1.09957	0.271518	1	0.371787	0.508397	-1.42745	4	14	0.371787	contigs_merge_contig_10478	0	2205	0.508397	-1.42745	0.371787	1.70237	2.37579	0.767541	8	59	1.70237	contigs_merge_contig_10478	0	2205	2.37579	0.767541	1.70237
contigs_merge_contig_10479	1.12951	1.12951	1.12951	1.69013	0.757132	0.757132	0.757132	2.06523	1.62239	1.62239	1.62239	1.72491	1.62239e-06	1.72491	0.656967	0.511202	1	1.62239e-06	1.72491	0.656967	0.511202	1	1.63667	2.23805	0.710766	9	9	1.63667	contigs_merge_contig_10479	0	322	2.23805	0.710766	1.63667	2.76619	3.86044	1.4679	14	14	2.76619	contigs_merge_contig_10479	0	322	3.86044	1.4679	2.76619
contigs_merge_contig_1048	0.215386	0.215386	0.215386	1.81085	0.856668	0.856668	0.856668	0.552072	0.308064	0.308064	0.308064	1.84812	3.08064e-07	1.84812	0.302879	0.761982	1	3.08064e-07	1.84812	0.302879	0.761982	1	0.265629	0.363232	-1.91251	2	9	0.265629	contigs_merge_contig_1048	0	1984	0.363232	-1.91251	0.265629	0.481015	0.671296	-1.05585	6	15	0.481015	contigs_merge_contig_1048	0	1984	0.671296	-1.05585	0.481015
contigs_merge_contig_10480	0.200167	0.200167	0.200167	1.69013	0.757132	0.757132	0.757132	0.575993	0.287511	0.287511	0.287511	1.72491	2.87511e-07	1.72491	0.276563	0.782116	1	2.87511e-07	1.72491	0.276563	0.782116	1	0.290043	0.396617	-1.78566	7	9	0.290043	contigs_merge_contig_10480	0	1817	0.396617	-1.78566	0.290043	0.49021	0.684129	-1.02853	11	14	0.49021	contigs_merge_contig_10480	0	1817	0.684129	-1.02853	0.49021
contigs_merge_contig_10481	0.356427	0.356427	0.356427	#DIV/0!	#DIV/0!	0	#DIV/0!	0	0.497424	0.497424	0.497424	#DIV/0!	4.97424e-07	#DIV/0!	0.705283	0.480634	1	4.97424e-07	#DIV/0!	0.705283	0.480634	1	0	0	#DIV/0!	0	0	0	contigs_merge_contig_10481	0	714	0	#DIV/0!	0	0.356427	0.497424	-1.48832	0	4	0.356427	contigs_merge_contig_10481	0	714	0.497424	-1.48832	0.356427
contigs_merge_contig_10482	0.701518	0.701518	-0.701518	-1.84075	0.880297	0.880297	-0.880297	2.37014	0.935804	0.935804	-0.935804	-1.80364	-9.35804e-07	-1.80364	-0.517919	0.604515	1	-9.35804e-07	-1.80364	-0.517919	0.604515	1	1.53591	2.10026	0.619093	8	8	1.53591	contigs_merge_contig_10482	0	305	2.10026	0.619093	1.53591	0.834391	1.16446	-0.261205	4	4	0.834391	contigs_merge_contig_10482	0	305	1.16446	-0.261205	0.834391
contigs_merge_contig_10483	0.224544	0.224544	-0.224544	-2.76113	1.46526	1.46526	-1.46526	-0.506885	0.303462	0.303462	-0.303462	-2.70546	-3.03462e-07	-2.70546	-0.373725	0.708609	1	-3.03462e-07	-2.70546	-0.373725	0.708609	1	0.352043	0.481398	-1.50618	3	3	0.352043	contigs_merge_contig_10483	0	499	0.481398	-1.50618	0.352043	0.1275	0.177936	-2.97144	1	1	0.1275	contigs_merge_contig_10483	0	499	0.177936	-2.97144	0.1275
contigs_merge_contig_10484	0.168766	0.168766	0.168766	2.35411	1.23518	1.23518	1.23518	0.588855	0.239034	0.239034	0.239034	2.40255	2.39034e-07	2.40255	0.313897	0.753599	1	2.39034e-07	2.40255	0.313897	0.7536	1	0.124633	0.170428	-3.00425	6	6	0.124633	contigs_merge_contig_10484	0	2819	0.170428	-3.00425	0.124633	0.293398	0.409461	-1.76907	13	13	0.293398	contigs_merge_contig_10484	0	2819	0.409461	-1.76907	0.293398
contigs_merge_contig_10485	0.0299829	0.0299829	-0.0299829	#DIV/0!	#DIV/0!	0	#DIV/0!	0	0.0409998	0.0409998	-0.0409998	#DIV/0!	-4.09998e-08	#DIV/0!	-0.202484	0.839538	1	-4.09998e-08	#DIV/0!	-0.202484	0.839538	1	0.0299829	0.0409998	-5.05972	0	1	0.0299829	contigs_merge_contig_10485	0	1953	0.0409998	-5.05972	0.0299829	0	0	#DIV/0!	0	0	0	contigs_merge_contig_10485	0	1953	0	#DIV/0!	0
contigs_merge_contig_10486	0.36159	0.36159	0.36159	1.30381	0.382737	0.382737	0.382737	2.52381	0.538121	0.538121	0.538121	1.33064	5.38121e-07	1.33064	0.276301	0.782317	1	5.38121e-07	1.33064	0.276301	0.782317	1	1.19017	1.62749	0.251172	5	5	1.19017	contigs_merge_contig_10486	0	246	1.62749	0.251172	1.19017	1.55176	2.16561	0.633909	6	6	1.55176	contigs_merge_contig_10486	0	246	2.16561	0.633909	1.55176
contigs_merge_contig_10487	0.0283013	0.0283013	0.0283013	1.2676	0.342095	0.342095	0.342095	0.894451	0.042473	0.042473	0.042473	1.29368	4.2473e-08	1.29368	0.0737443	0.941214	1	4.2473e-08	1.29368	0.0737443	0.941214	1	0.105761	0.144622	-3.24112	6	6	0.105761	contigs_merge_contig_10487	0	3322	0.144622	-3.24112	0.105761	0.134063	0.187095	-2.89902	7	7	0.134063	contigs_merge_contig_10487	0	3322	0.187095	-2.89902	0.134063
contigs_merge_contig_10488	0	0	0	1	#NUM!	0	#NUM!	#NUM!	0	0	0	1	0	1	0	1	1	0	1	0	1	1	0	0	#DIV/0!	0	0	0	contigs_merge_contig_10488	0	515	0	#DIV/0!	0	0	0	#DIV/0!	0	0	0	contigs_merge_contig_10488	0	515	0	#DIV/0!	0
contigs_merge_contig_10489	0	0	0	1	#NUM!	0	#NUM!	#NUM!	0	0	0	1	0	1	0	1	1	0	1	0	1	1	0	0	#DIV/0!	0	0	0	contigs_merge_contig_10489	0	378	0	#DIV/0!	0	0	0	#DIV/0!	0	0	0	contigs_merge_contig_10489	0	378	0	#DIV/0!	0
contigs_merge_contig_1049	0.123126	0.123126	-0.123126	-1.01917	0.0273886	0.0273886	-0.0273886	-1.01021	0.0124185	0.0124185	0.0124185	1.00139	1.24185e-08	1.00139	0.0029337	0.997659	1	1.24185e-08	1.00139	0.0029337	0.997659	1	6.54742	8.9532	2.71093	614	619	6.54742	contigs_merge_contig_1049	0	5536	8.9532	2.71093	6.54742	6.42429	8.96562	2.68354	554	559	6.42429	contigs_merge_contig_1049	0	5536	8.96562	2.68354	6.42429
contigs_merge_contig_10490	0	0	0	1	#NUM!	0	#NUM!	#NUM!	0	0	0	1	0	1	0	1	1	0	1	0	1	1	0	0	#DIV/0!	0	0	0	contigs_merge_contig_10490	0	1728	0	#DIV/0!	0	0	0	#DIV/0!	0	0	0	contigs_merge_contig_10490	0	1728	0	#DIV/0!	0
contigs_merge_contig_10491	0	0	0	1	#NUM!	0	#NUM!	#NUM!	0	0	0	1	0	1	0	1	1	0	1	0	1	1	0	0	#DIV/0!	0	0	0	contigs_merge_contig_10491	0	374	0	#DIV/0!	0	0	0	#DIV/0!	0	0	0	contigs_merge_contig_10491	0	374	0	#DIV/0!	0
contigs_merge_contig_10492	0.240479	0.240479	-0.240479	#DIV/0!	#DIV/0!	0	#DIV/0!	0	0.32884	0.32884	-0.32884	#DIV/0!	-3.2884e-07	#DIV/0!	-0.573446	0.566343	1	-3.2884e-07	#DIV/0!	-0.573446	0.566343	1	0.240479	0.32884	-2.05602	2	2	0.240479	contigs_merge_contig_10492	0	487	0.32884	-2.05602	0.240479	0	0	#DIV/0!	0	0	0	contigs_merge_contig_10492	0	487	0	#DIV/0!	0
contigs_merge_contig_10493	0.13609	0.13609	0.13609	#DIV/0!	#DIV/0!	0	#DIV/0!	0	0.189925	0.189925	0.189925	#DIV/0!	1.89925e-07	#DIV/0!	0.435804	0.662979	1	1.89925e-07	#DIV/0!	0.435804	0.662979	1	0	0	#DIV/0!	0	0	0	contigs_merge_contig_10493	0	935	0	#DIV/0!	0	0.13609	0.189925	-2.87736	2	2	0.13609	contigs_merge_contig_10493	0	935	0.189925	-2.87736	0.13609
contigs_merge_contig_10494	0.368291	0.368291	0.368291	#DIV/0!	#DIV/0!	0	#DIV/0!	0	0.51398	0.51398	0.51398	#DIV/0!	5.1398e-07	#DIV/0!	0.716924	0.473421	1	5.1398e-07	#DIV/0!	0.716924	0.473421	1	0	0	#DIV/0!	0	0	0	contigs_merge_contig_10494	0	691	0	#DIV/0!	0	0.368291	0.51398	-1.44108	4	4	0.368291	contigs_merge_contig_10494	0	691	0.51398	-1.44108	0.368291
contigs_merge_contig_10495	0.029892	0.029892	-0.029892	-1.38057	0.46526	0.46526	-0.46526	-0.873237	0.0386651	0.0386651	-0.0386651	-1.35273	-3.86651e-08	-1.35273	-0.0761367	0.93931	1	-3.86651e-08	-1.35273	-0.0761367	0.93931	1	0.108438	0.148283	-3.20506	3	3	0.108438	contigs_merge_contig_10495	0	1620	0.148283	-3.20506	0.108438	0.0785461	0.109617	-3.67032	2	2	0.0785461	contigs_merge_contig_10495	0	1620	0.109617	-3.67032	0.0785461
contigs_merge_contig_10496	0	0	0	1	#NUM!	0	#NUM!	#NUM!	0	0	0	1	0	1	0	1	1	0	1	0	1	1	0	0	#DIV/0!	0	0	0	contigs_merge_contig_10496	0	623	0	#DIV/0!	0	0	0	#DIV/0!	0	0	0	contigs_merge_contig_10496	0	623	0	#DIV/0!	0
contigs_merge_contig_10497	0.109807	0.109807	-0.109807	-1.38057	0.46526	0.46526	-0.46526	-0.740538	0.142035	0.142035	-0.142035	-1.35273	-1.42035e-07	-1.35273	-0.145926	0.88398	1	-1.42035e-07	-1.35273	-0.145926	0.88398	1	0.398344	0.544711	-1.32791	3	3	0.398344	contigs_merge_contig_10497	0	441	0.544711	-1.32791	0.398344	0.288537	0.402676	-1.79317	2	2	0.288537	contigs_merge_contig_10497	0	441	0.402676	-1.79317	0.288537
contigs_merge_contig_10498	19.2578	19.2578	19.2578	3.69578	1.88588	1.88588	1.88588	1.66482	27.0769	27.0769	27.0769	3.77184	2.70769e-05	3.77184	3.96593	7.31092e-05	0.0120807	2.70769e-05	3.77184	3.96595	7.31078e-05	0.0120804	7.14368	9.76856	2.83667	132	132	7.14368	contigs_merge_contig_10498	0	1082	9.76856	2.83667	7.14368	26.4015	36.8454	4.72255	449	449	26.4015	contigs_merge_contig_10498	0	1082	36.8454	4.72255	26.4015
contigs_merge_contig_10499	0	0	0	1	#NUM!	0	#NUM!	#NUM!	0	0	0	1	0	1	0	1	1	0	1	0	1	1	0	0	#DIV/0!	0	0	0	contigs_merge_contig_10499	0	1693	0	#DIV/0!	0	0	0	#DIV/0!	0	0	0	contigs_merge_contig_10499	0	1693	0	#DIV/0!	0
contigs_merge_contig_105	0	0	0	1	#NUM!	0	#NUM!	#NUM!	0	0	0	1	0	1	0	1	1	0	1	0	1	1	0	0	#DIV/0!	0	0	0	contigs_merge_contig_105	0	382	0	#DIV/0!	0	0	0	#DIV/0!	0	0	0	contigs_merge_contig_105	0	382	0	#DIV/0!	0
contigs_merge_contig_1050	2.68563	2.68563	2.68563	1.31242	0.392228	0.392228	0.392228	1.12637	3.98992	3.98992	3.98992	1.33943	3.98992e-06	1.33943	0.760858	0.446742	1	3.98992e-06	1.33943	0.760858	0.446742	1	8.59623	11.7548	3.1037	43	101	8.59623	contigs_merge_contig_1050	0	688	11.7548	3.1037	8.59623	11.2819	15.7448	3.49593	56	122	11.2819	contigs_merge_contig_1050	0	688	15.7448	3.49593	11.2819
contigs_merge_contig_10500	0.0763822	0.0763822	0.0763822	1.03031	0.0430812	0.0430812	0.0430812	1.03231	0.177509	0.177509	0.177509	1.05152	1.77509e-07	1.05152	0.0667638	0.94677	1	1.77509e-07	1.05152	0.0667638	0.94677	1	2.51987	3.44577	1.33335	216	290	2.51987	contigs_merge_contig_10500	0	6739	3.44577	1.33335	2.51987	2.59625	3.62328	1.37643	206	275	2.59625	contigs_merge_contig_10500	0	6739	3.62328	1.37643	2.59625
contigs_merge_contig_10501	0.374249	0.374249	0.374249	#DIV/0!	#DIV/0!	0	#DIV/0!	0	0.522295	0.522295	0.522295	#DIV/0!	5.22295e-07	#DIV/0!	0.7227	0.469864	1	5.22295e-07	#DIV/0!	0.7227	0.469865	1	0	0	#DIV/0!	0	0	0	contigs_merge_contig_10501	0	1360	0	#DIV/0!	0	0.374249	0.522295	-1.41793	8	8	0.374249	contigs_merge_contig_10501	0	1360	0.522295	-1.41793	0.374249
contigs_merge_contig_10502	2.15043	2.15043	2.15043	1.20844	0.273144	0.273144	0.273144	1.08113	3.29143	3.29143	3.29143	1.23331	3.29143e-06	1.23331	0.586388	0.557615	1	3.29143e-06	1.23331	0.586389	0.557615	1	10.3169	14.1077	3.36693	194	401	10.3169	contigs_merge_contig_10502	0	2276	14.1077	3.36693	10.3169	12.4673	17.3991	3.64008	194	446	12.4673	contigs_merge_contig_10502	0	2276	17.3991	3.64008	12.4673
contigs_merge_contig_10503	0.172131	0.172131	0.172131	1.02383	0.0339726	0.0339726	0.0339726	1.01191	0.443515	0.443515	0.443515	1.0449	4.43515e-07	1.0449	0.0986802	0.921392	1	4.43515e-07	1.0449	0.0986802	0.921392	1	7.22406	9.87847	2.85281	104	104	7.22406	contigs_merge_contig_10503	0	843	9.87847	2.85281	7.22406	7.39619	10.322	2.88678	98	98	7.39619	contigs_merge_contig_10503	0	843	10.322	2.88678	7.39619
contigs_merge_contig_10504	0.70716	0.70716	0.70716	2.68432	1.42456	1.42456	1.42456	-0.137772	0.998714	0.998714	0.998714	2.73956	9.98714e-07	2.73956	0.681601	0.495491	1	9.98714e-07	2.73956	0.681601	0.495491	1	0.419849	0.574118	-1.25206	10	17	0.419849	contigs_merge_contig_10504	0	2371	0.574118	-1.25206	0.419849	1.12701	1.57283	0.172498	31	42	1.12701	contigs_merge_contig_10504	0	2371	1.57283	0.172498	1.12701
contigs_merge_contig_10505	0.0325624	0.0325624	0.0325624	1.62977	0.704665	0.704665	0.704665	0.83511	0.0468985	0.0468985	0.0468985	1.66331	4.68985e-08	1.66331	0.108075	0.913936	1	4.68985e-08	1.66331	0.108075	0.913936	1	0.0517055	0.0707043	-4.27354	2	2	0.0517055	contigs_merge_contig_10505	0	2265	0.0707043	-4.27354	0.0517055	0.0842679	0.117603	-3.56887	3	3	0.0842679	contigs_merge_contig_10505	0	2265	0.117603	-3.56887	0.0842679
contigs_merge_contig_10506	1.00409	1.00409	1.00409	1.12616	0.171418	0.171418	0.171418	1.05728	1.62525	1.62525	1.62525	1.14934	1.62525e-06	1.14934	0.336046	0.736836	1	1.62525e-06	1.14934	0.336046	0.736836	1	7.95858	10.8829	2.99251	21	274	7.95858	contigs_merge_contig_10506	0	2016	10.8829	2.99251	7.95858	8.96267	12.5081	3.16393	43	284	8.96267	contigs_merge_contig_10506	0	2016	12.5081	3.16393	8.96267
contigs_merge_contig_10507	0.0777859	0.0777859	-0.0777859	-1.84075	0.880297	0.880297	-0.880297	-0.74366	0.103764	0.103764	-0.103764	-1.80364	-1.03764e-07	-1.80364	-0.172462	0.863075	1	-1.03764e-07	-1.80364	-0.172462	0.863075	1	0.170305	0.232882	-2.55381	0	6	0.170305	contigs_merge_contig_10507	0	2063	0.232882	-2.55381	0.170305	0.0925191	0.129118	-3.4341	0	3	0.0925191	contigs_merge_contig_10507	0	2063	0.129118	-3.4341	0.0925191
contigs_merge_contig_10508	2.45903	2.45903	2.45903	1.60013	0.678193	0.678193	0.678193	1.33331	3.54708	3.54708	3.54708	1.63306	3.54708e-06	1.63306	0.923486	0.355754	1	3.54708e-06	1.63306	0.923486	0.355754	1	4.09747	5.60304	2.03473	220	220	4.09747	contigs_merge_contig_10508	0	3144	5.60304	2.03473	4.09747	6.5565	9.15013	2.71293	324	324	6.5565	contigs_merge_contig_10508	0	3144	9.15013	2.71293	6.5565
contigs_merge_contig_10509	0.0667523	0.0667523	0.0667523	2.17302	1.1197	1.1197	1.1197	0.729231	0.0947596	0.0947596	0.0947596	2.21774	9.47596e-08	2.21774	0.189371	0.849802	1	9.47596e-08	2.21774	0.189371	0.849802	1	0.0569062	0.0778159	-4.13527	1	1	0.0569062	contigs_merge_contig_10509	0	1029	0.0778159	-4.13527	0.0569062	0.123659	0.172576	-3.01557	2	2	0.123659	contigs_merge_contig_10509	0	1029	0.172576	-3.01557	0.123659
contigs_merge_contig_1051	0.142396	0.142396	0.142396	2.17302	1.1197	1.1197	1.1197	0.63195	0.202141	0.202141	0.202141	2.21774	2.02141e-07	2.21774	0.276585	0.782099	1	2.02141e-07	2.21774	0.276585	0.782099	1	0.121392	0.165997	-3.04225	8	8	0.121392	contigs_merge_contig_1051	0	3859	0.165997	-3.04225	0.121392	0.263788	0.368137	-1.92255	16	16	0.263788	contigs_merge_contig_1051	0	3859	0.368137	-1.92255	0.263788
contigs_merge_contig_10510	0.214493	0.214493	-0.214493	#DIV/0!	#DIV/0!	0	#DIV/0!	0	0.293306	0.293306	-0.293306	#DIV/0!	-2.93306e-07	#DIV/0!	-0.541577	0.58811	1	-2.93306e-07	#DIV/0!	-0.541578	0.58811	1	0.214493	0.293306	-2.221	1	1	0.214493	contigs_merge_contig_10510	0	273	0.293306	-2.221	0.214493	0	0	#DIV/0!	0	0	0	contigs_merge_contig_10510	0	273	0	#DIV/0!	0
contigs_merge_contig_10511	0.471641	0.471641	-0.471641	-2.94521	1.55837	1.55837	-1.55837	-0.237649	0.638118	0.638118	-0.638118	-2.88582	-6.38118e-07	-2.88582	-0.556493	0.577874	1	-6.38118e-07	-2.88582	-0.556493	0.577874	1	0.714104	0.976495	-0.485794	32	32	0.714104	contigs_merge_contig_10511	0	2624	0.976495	-0.485794	0.714104	0.242463	0.338377	-2.04416	10	10	0.242463	contigs_merge_contig_10511	0	2624	0.338377	-2.04416	0.242463
contigs_merge_contig_10512	0.63025	0.63025	0.63025	7.06232	2.82014	2.82014	2.82014	0.136481	0.882491	0.882491	0.882491	7.20766	8.82491e-07	7.20766	0.816976	0.413942	1	8.82491e-07	7.20766	0.816977	0.413942	1	0.103962	0.142162	-3.26587	4	4	0.103962	contigs_merge_contig_10512	0	2253	0.142162	-3.26587	0.103962	0.734212	1.02465	-0.445731	26	26	0.734212	contigs_merge_contig_10512	0	2253	1.02465	-0.445731	0.734212
contigs_merge_contig_10513	0.286393	0.286393	0.286393	1.21434	0.280167	0.280167	0.280167	1.67006	0.437286	0.437286	0.437286	1.23933	4.37286e-07	1.23933	0.216182	0.828846	1	4.37286e-07	1.23933	0.216182	0.828846	1	1.33619	1.82716	0.418124	17	17	1.33619	contigs_merge_contig_10513	0	745	1.82716	0.418124	1.33619	1.62258	2.26445	0.698292	19	19	1.62258	contigs_merge_contig_10513	0	745	2.26445	0.698292	1.62258
contigs_merge_contig_10514	2.82969	2.82969	2.82969	1.88958	0.918069	0.918069	0.918069	1.54993	4.03858	4.03858	4.03858	1.92847	4.03858e-06	1.92847	1.13156	0.257818	1	4.03858e-06	1.92847	1.13157	0.257817	1	3.18092	4.34971	1.66944	115	115	3.18092	contigs_merge_contig_10514	0	2117	4.34971	1.66944	3.18092	6.01061	8.3883	2.58751	200	200	6.01061	contigs_merge_contig_10514	0	2117	8.3883	2.58751	6.01061
contigs_merge_contig_10515	2.00249	2.00249	2.00249	2.73057	1.4492	1.4492	1.4492	7.88319	2.8272	2.8272	2.8272	2.78677	2.8272e-06	2.78677	1.15499	0.248095	1	2.8272e-06	2.78677	1.15499	0.248095	1	1.15712	1.5823	0.210543	76	76	1.15712	contigs_merge_contig_10515	0	3846	1.5823	0.210543	1.15712	3.15961	4.40949	1.65975	191	191	3.15961	contigs_merge_contig_10515	0	3846	4.40949	1.65975	3.15961
contigs_merge_contig_10516	9.10992	9.10992	9.10992	1.91772	0.939393	0.939393	0.939393	1.28369	12.993	12.993	12.993	1.95719	1.2993e-05	1.95719	2.05077	0.040289	1	1.2993e-05	1.95719	2.05078	0.0402889	1	9.92667	13.5741	3.31131	366	366	9.92667	contigs_merge_contig_10516	0	2159	13.5741	3.31131	9.92667	19.0366	26.5671	4.2507	646	646	19.0366	contigs_merge_contig_10516	0	2159	26.5671	4.2507	19.0366
contigs_merge_contig_10517	0.00419526	0.00419526	0.00419526	1.08651	0.119703	0.119703	0.119703	0.972583	0.00721949	0.00721949	0.00721949	1.10887	7.21949e-09	1.10887	0.0193056	0.984597	1	7.21949e-09	1.10887	0.0193056	0.984597	1	0.048494	0.0663127	-4.36605	2	2	0.048494	contigs_merge_contig_10517	0	2415	0.0663127	-4.36605	0.048494	0.0526893	0.0735322	-4.24635	2	2	0.0526893	contigs_merge_contig_10517	0	2415	0.0735322	-4.24635	0.0526893
contigs_merge_contig_10518	0.203699	0.203699	0.203699	1.16412	0.219238	0.219238	0.219238	1.70337	0.319206	0.319206	0.319206	1.18808	3.19206e-07	1.18808	0.165642	0.868439	1	3.19206e-07	1.18808	0.165642	0.868439	1	1.24117	1.69722	0.311698	22	28	1.24117	contigs_merge_contig_10518	0	1321	1.69722	0.311698	1.24117	1.44487	2.01643	0.530936	29	30	1.44487	contigs_merge_contig_10518	0	1321	2.01643	0.530936	1.44487
contigs_merge_contig_10519	1.99268	1.99268	-1.99268	-1.241	0.311504	0.311504	-0.311504	-1.10221	2.49219	2.49219	-2.49219	-1.21598	-2.49219e-06	-1.21598	-0.49285	0.622119	1	-2.49219e-06	-1.21598	-0.49285	0.622119	1	10.261	14.0314	3.3591	658	658	10.261	contigs_merge_contig_10519	0	3755	14.0314	3.3591	10.261	8.26836	11.5392	3.0476	488	488	8.26836	contigs_merge_contig_10519	0	3755	11.5392	3.0476	8.26836
contigs_merge_contig_1052	0.0112663	0.0112663	0.0112663	1.01046	0.0150051	0.0150051	0.0150051	1.13917	0.0460476	0.0460476	0.0460476	1.03125	4.60476e-08	1.03125	0.0266161	0.978766	1	4.60476e-08	1.03125	0.0266161	0.978766	1	1.0776	1.47355	0.107815	17	100	1.0776	contigs_merge_contig_1052	0	5434	1.47355	0.107815	1.0776	1.08886	1.5196	0.122821	12	93	1.08886	contigs_merge_contig_1052	0	5434	1.5196	0.122821	1.08886
contigs_merge_contig_10520	0.458546	0.458546	0.458546	1.85851	0.894143	0.894143	0.894143	0.0117364	0.654969	0.654969	0.654969	1.89675	6.54969e-07	1.89675	0.450289	0.652502	1	6.54969e-07	1.89675	0.450289	0.652502	1	0.534121	0.730379	-0.904761	38	38	0.534121	contigs_merge_contig_10520	0	4166	0.730379	-0.904761	0.534121	0.992667	1.38535	-0.0106187	65	65	0.992667	contigs_merge_contig_10520	0	4166	1.38535	-0.0106187	0.992667
contigs_merge_contig_10521	0.348797	0.348797	0.348797	3.25953	1.70467	1.70467	1.70467	0.367604	0.491119	0.491119	0.491119	3.32661	4.91119e-07	3.32661	0.513903	0.60732	1	4.91119e-07	3.32661	0.513903	0.60732	1	0.154367	0.211088	-2.69556	6	6	0.154367	contigs_merge_contig_10521	0	2276	0.211088	-2.69556	0.154367	0.503164	0.702206	-0.990899	18	18	0.503164	contigs_merge_contig_10521	0	2276	0.702206	-0.990899	0.503164
contigs_merge_contig_10522	0.510719	0.510719	-0.510719	-1.81935	0.863424	0.863424	-0.863424	0.266108	0.680837	0.680837	-0.680837	-1.78266	-6.80837e-07	-1.78266	-0.437602	0.661675	1	-6.80837e-07	-1.78266	-0.437602	0.661675	1	1.13404	1.55073	0.181473	30	85	1.13404	contigs_merge_contig_10522	0	4389	1.55073	0.181473	1.13404	0.623322	0.869896	-0.681951	24	43	0.623322	contigs_merge_contig_10522	0	4389	0.869896	-0.681951	0.623322
contigs_merge_contig_10523	0	0	0	1	#NUM!	0	#NUM!	#NUM!	0	0	0	1	0	1	0	1	1	0	1	0	1	1	0	0	#DIV/0!	0	0	0	contigs_merge_contig_10523	0	1835	0	#DIV/0!	0	0	0	#DIV/0!	0	0	0	contigs_merge_contig_10523	0	1835	0	#DIV/0!	0
contigs_merge_contig_10524	0.190263	0.190263	0.190263	1.37903	0.463657	0.463657	0.463657	0.5337	0.279653	0.279653	0.279653	1.40741	2.79653e-07	1.40741	0.217546	0.827783	1	2.79653e-07	1.40741	0.217546	0.827783	1	0.501968	0.686412	-0.994332	26	26	0.501968	contigs_merge_contig_10524	0	3033	0.686412	-0.994332	0.501968	0.692231	0.966064	-0.530675	33	33	0.692231	contigs_merge_contig_10524	0	3033	0.966064	-0.530675	0.692231
contigs_merge_contig_10525	0.0473437	0.0473437	0.0473437	1.08651	0.119703	0.119703	0.119703	0.862365	0.0814723	0.0814723	0.0814723	1.10887	8.14723e-08	1.10887	0.0648538	0.94829	1	8.14723e-08	1.10887	0.0648538	0.94829	1	0.547257	0.748342	-0.869709	2	2	0.547257	contigs_merge_contig_10525	0	214	0.748342	-0.869709	0.547257	0.594601	0.829814	-0.750006	2	2	0.594601	contigs_merge_contig_10525	0	214	0.829814	-0.750006	0.594601
contigs_merge_contig_10526	0.412669	0.412669	0.412669	2.2566	1.17415	1.17415	1.17415	0.26911	0.585155	0.585155	0.585155	2.30304	5.85155e-07	2.30304	0.48046	0.6309	1	5.85155e-07	2.30304	0.48046	0.6309	1	0.328402	0.44907	-1.60647	12	13	0.328402	contigs_merge_contig_10526	0	2318	0.44907	-1.60647	0.328402	0.741071	1.03422	-0.432317	19	27	0.741071	contigs_merge_contig_10526	0	2318	1.03422	-0.432317	0.741071
contigs_merge_contig_10527	0.555	0.555	0.555	5.43255	2.44163	2.44163	2.44163	0.185466	0.778071	0.778071	0.778071	5.54435	7.78071e-07	5.54435	0.735042	0.462314	1	7.78071e-07	5.54435	0.735043	0.462314	1	0.12521	0.171217	-2.99758	3	3	0.12521	contigs_merge_contig_10527	0	1403	0.171217	-2.99758	0.12521	0.68021	0.949288	-0.555948	15	15	0.68021	contigs_merge_contig_10527	0	1403	0.949288	-0.555948	0.68021
contigs_merge_contig_10528	1.09415	1.09415	1.09415	2.17302	1.1197	1.1197	1.1197	-10.1498	1.55322	1.55322	1.55322	2.21774	1.55322e-06	2.21774	0.766688	0.443267	1	1.55322e-06	2.21774	0.766688	0.443267	1	0.932759	1.27549	-0.100424	54	54	0.932759	contigs_merge_contig_10528	0	3390	1.27549	-0.100424	0.932759	2.02691	2.82871	1.01928	108	108	2.02691	contigs_merge_contig_10528	0	3390	2.82871	1.01928	2.02691
contigs_merge_contig_10529	6.47582	6.47582	6.47582	1.34492	0.427525	0.427525	0.427525	1.10105	9.56587	9.56587	9.56587	1.3726	9.56587e-06	1.3726	1.22569	0.220317	1	9.56587e-06	1.3726	1.22569	0.220317	1	18.7746	25.6732	4.23071	169	185	18.7746	contigs_merge_contig_10529	0	577	25.6732	4.23071	18.7746	25.2504	35.2391	4.65824	211	229	25.2504	contigs_merge_contig_10529	0	577	35.2391	4.65824	25.2504
contigs_merge_contig_1053	0	0	0	1	#NUM!	0	#NUM!	#NUM!	0	0	0	1	0	1	0	1	1	0	1	0	1	1	0	0	#DIV/0!	0	0	0	contigs_merge_contig_1053	0	251	0	#DIV/0!	0	0	0	#DIV/0!	0	0	0	contigs_merge_contig_1053	0	251	0	#DIV/0!	0
contigs_merge_contig_10530	0	0	0	1	#NUM!	0	#NUM!	#NUM!	0	0	0	1	0	1	0	1	1	0	1	0	1	1	0	0	#DIV/0!	0	0	0	contigs_merge_contig_10530	0	275	0	#DIV/0!	0	0	0	#DIV/0!	0	0	0	contigs_merge_contig_10530	0	275	0	#DIV/0!	0
contigs_merge_contig_10531	0.331808	0.331808	0.331808	4.34604	2.1197	2.1197	2.1197	0.364223	0.465856	0.465856	0.465856	4.43548	4.65856e-07	4.43548	0.542626	0.587387	1	4.65856e-07	4.43548	0.542626	0.587387	1	0.0991643	0.135601	-3.33404	6	6	0.0991643	contigs_merge_contig_10531	0	3543	0.135601	-3.33404	0.0991643	0.430972	0.601457	-1.21433	24	24	0.430972	contigs_merge_contig_10531	0	3543	0.601457	-1.21433	0.430972
contigs_merge_contig_10532	0.0765612	0.0765612	-0.0765612	-2.76113	1.46526	1.46526	-1.46526	-0.676096	0.103469	0.103469	-0.103469	-2.70546	-1.03469e-07	-2.70546	-0.218226	0.827253	1	-1.03469e-07	-2.70546	-0.218226	0.827253	1	0.120034	0.164139	-3.05849	6	6	0.120034	contigs_merge_contig_10532	0	2927	0.164139	-3.05849	0.120034	0.0434727	0.0606697	-4.52375	2	2	0.0434727	contigs_merge_contig_10532	0	2927	0.0606697	-4.52375	0.0434727
contigs_merge_contig_10533	0.537789	0.537789	-0.537789	-1.06465	0.090383	0.090383	-0.090383	-1.02957	0.501315	0.501315	-0.501315	-1.04318	-5.01315e-07	-1.04318	-0.102936	0.918013	1	-5.01315e-07	-1.04318	-0.102936	0.918013	1	8.8559	12.1099	3.14664	202	214	8.8559	contigs_merge_contig_10533	0	1415	12.1099	3.14664	8.8559	8.31811	11.6086	3.05626	167	185	8.31811	contigs_merge_contig_10533	0	1415	11.6086	3.05626	8.31811
contigs_merge_contig_10534	0.038997	0.038997	0.038997	1.67156	0.741191	0.741191	0.741191	0.819489	0.0560576	0.0560576	0.0560576	1.70595	5.60576e-08	1.70595	0.120933	0.903744	1	5.60576e-08	1.70595	0.120933	0.903744	1	0.0580696	0.0794068	-4.10607	12	13	0.0580696	contigs_merge_contig_10534	0	13109	0.0794068	-4.10607	0.0580696	0.0970666	0.135464	-3.36488	19	20	0.0970666	contigs_merge_contig_10534	0	13109	0.135464	-3.36488	0.0970666
contigs_merge_contig_10535	0.0599882	0.0599882	0.0599882	1.81085	0.856668	0.856668	0.856668	0.771962	0.0858003	0.0858003	0.0858003	1.84812	8.58003e-08	1.84812	0.159843	0.873005	1	8.58003e-08	1.84812	0.159843	0.873005	1	0.0739817	0.101166	-3.75669	6	6	0.0739817	contigs_merge_contig_10535	0	4749	0.101166	-3.75669	0.0739817	0.13397	0.186966	-2.90002	10	10	0.13397	contigs_merge_contig_10535	0	4749	0.186966	-2.90002	0.13397
contigs_merge_contig_10536	0.11155	0.11155	-0.11155	-9.20377	3.20223	3.20223	-3.20223	-0.483556	0.152156	0.152156	-0.152156	-9.01819	-1.52156e-07	-9.01819	-0.348969	0.727112	1	-1.52156e-07	-9.01819	-0.348969	0.727112	1	0.125148	0.171132	-2.9983	0	10	0.125148	contigs_merge_contig_10536	0	4679	0.171132	-2.9983	0.125148	0.0135974	0.0189763	-6.20052	0	1	0.0135974	contigs_merge_contig_10536	0	4679	0.0189763	-6.20052	0.0135974
contigs_merge_contig_10537	0.65886	0.65886	-0.65886	-3.22132	1.68765	1.68765	-1.68765	-0.0374825	0.892606	0.892606	-0.892606	-3.15637	-8.92606e-07	-3.15637	-0.68051	0.496182	1	-8.92606e-07	-3.15637	-0.68051	0.496182	1	0.955468	1.30655	-0.0657208	7	7	0.955468	contigs_merge_contig_10537	0	429	1.30655	-0.0657208	0.955468	0.296607	0.41394	-1.75337	2	2	0.296607	contigs_merge_contig_10537	0	429	0.41394	-1.75337	0.296607
contigs_merge_contig_10538	0	0	0	1	#NUM!	0	#NUM!	#NUM!	0	0	0	1	0	1	0	1	1	0	1	0	1	1	0	0	#DIV/0!	0	0	0	contigs_merge_contig_10538	0	7181	0	#DIV/0!	0	0	0	#DIV/0!	0	0	0	contigs_merge_contig_10538	0	7181	0	#DIV/0!	0
contigs_merge_contig_10539	0	0	0	1	#NUM!	0	#NUM!	#NUM!	0	0	0	1	0	1	0	1	1	0	1	0	1	1	0	0	#DIV/0!	0	0	0	contigs_merge_contig_10539	0	1549	0	#DIV/0!	0	0	0	#DIV/0!	0	0	0	contigs_merge_contig_10539	0	1549	0	#DIV/0!	0
contigs_merge_contig_1054	0	0	0	1	#NUM!	0	#NUM!	#NUM!	0	0	0	1	0	1	0	1	1	0	1	0	1	1	0	0	#DIV/0!	0	0	0	contigs_merge_contig_1054	0	668	0	#DIV/0!	0	0	0	#DIV/0!	0	0	0	contigs_merge_contig_1054	0	668	0	#DIV/0!	0
contigs_merge_contig_10540	0	0	0	1	#NUM!	0	#NUM!	#NUM!	0	0	0	1	0	1	0	1	1	0	1	0	1	1	0	0	#DIV/0!	0	0	0	contigs_merge_contig_10540	0	399	0	#DIV/0!	0	0	0	#DIV/0!	0	0	0	contigs_merge_contig_10540	0	399	0	#DIV/0!	0
contigs_merge_contig_10541	0.15685	0.15685	0.15685	1.22232	0.289628	0.289628	0.289628	0.424522	0.238751	0.238751	0.238751	1.24748	2.38751e-07	1.24748	0.162141	0.871194	1	2.38751e-07	1.24748	0.162141	0.871194	1	0.7055	0.96473	-0.503281	8	8	0.7055	contigs_merge_contig_10541	0	664	0.96473	-0.503281	0.7055	0.86235	1.20348	-0.213654	9	9	0.86235	contigs_merge_contig_10541	0	664	1.20348	-0.213654	0.86235
contigs_merge_contig_10542	0.000669916	0.000669916	-0.000669916	-1.00159	0.002288	0.002288	-0.002288	-0.998161	0.0109617	0.0109617	0.0109617	1.01896	1.09617e-08	1.01896	0.0101465	0.991904	1	1.09617e-08	1.01896	0.0101465	0.991904	1	0.42275	0.578085	-1.24212	32	37	0.42275	contigs_merge_contig_10542	0	5125	0.578085	-1.24212	0.42275	0.42208	0.589047	-1.24441	28	34	0.42208	contigs_merge_contig_10542	0	5125	0.589047	-1.24441	0.42208
contigs_merge_contig_10543	0.58953	0.58953	-0.58953	-2.02483	1.0178	1.0178	-1.0178	0.275844	0.78996	0.78996	-0.78996	-1.984	-7.8996e-07	-1.984	-0.510389	0.609779	1	-7.8996e-07	-1.984	-0.510389	0.609779	1	1.16478	1.59276	0.220054	8	11	1.16478	contigs_merge_contig_10543	0	553	1.59276	0.220054	1.16478	0.575247	0.802804	-0.797747	3	5	0.575247	contigs_merge_contig_10543	0	553	0.802804	-0.797747	0.575247
contigs_merge_contig_10544	0.748498	0.748498	0.748498	#DIV/0!	#DIV/0!	0	#DIV/0!	0	1.04459	1.04459	1.04459	#DIV/0!	1.04459e-06	#DIV/0!	1.02205	0.306756	1	1.04459e-06	#DIV/0!	1.02205	0.306756	1	0	0	#DIV/0!	0	0	0	contigs_merge_contig_10544	0	765	0	#DIV/0!	0	0.748498	1.04459	-0.41793	1	9	0.748498	contigs_merge_contig_10544	0	765	1.04459	-0.41793	0.748498
contigs_merge_contig_10545	0.343887	0.343887	0.343887	2.21326	1.14617	1.14617	1.14617	0.369848	0.487898	0.487898	0.487898	2.25881	4.87898e-07	2.25881	0.434126	0.664197	1	4.87898e-07	2.25881	0.434126	0.664197	1	0.28344	0.387587	-1.81889	23	27	0.28344	contigs_merge_contig_10545	0	5578	0.387587	-1.81889	0.28344	0.627326	0.875485	-0.672712	52	55	0.627326	contigs_merge_contig_10545	0	5578	0.875485	-0.672712	0.627326
contigs_merge_contig_10546	4.28965	4.28965	4.28965	1.55635	0.63817	0.63817	0.63817	1.21656	6.20353	6.20353	6.20353	1.58838	6.20353e-06	1.58838	1.18751	0.235026	1	6.20353e-06	1.58838	1.18751	0.235026	1	7.71029	10.5434	2.94679	37	37	7.71029	contigs_merge_contig_10546	0	281	10.5434	2.94679	7.71029	11.9999	16.7469	3.58495	53	53	11.9999	contigs_merge_contig_10546	0	281	16.7469	3.58495	11.9999
contigs_merge_contig_10547	0.169096	0.169096	0.169096	#DIV/0!	#DIV/0!	0	#DIV/0!	0	0.235987	0.235987	0.235987	#DIV/0!	2.35987e-07	#DIV/0!	0.485785	0.62712	1	2.35987e-07	#DIV/0!	0.485785	0.62712	1	0	0	#DIV/0!	0	0	0	contigs_merge_contig_10547	0	1505	0	#DIV/0!	0	0.169096	0.235987	-2.56409	4	4	0.169096	contigs_merge_contig_10547	0	1505	0.235987	-2.56409	0.169096
contigs_merge_contig_10548	0.0315314	0.0315314	-0.0315314	-1.08473	0.117337	0.117337	-0.117337	-0.917721	0.032645	0.032645	-0.032645	-1.06286	-3.2645e-08	-1.06286	-0.0315394	0.974839	1	-3.2645e-08	-1.06286	-0.0315394	0.974839	1	0.403669	0.551994	-1.30875	33	33	0.403669	contigs_merge_contig_10548	0	4787	0.551994	-1.30875	0.403669	0.372138	0.519349	-1.42609	28	28	0.372138	contigs_merge_contig_10548	0	4787	0.519349	-1.42609	0.372138
contigs_merge_contig_10549	0	0	0	1	#NUM!	0	#NUM!	#NUM!	0	0	0	1	0	1	0	1	1	0	1	0	1	1	0	0	#DIV/0!	0	0	0	contigs_merge_contig_10549	0	296	0	#DIV/0!	0	0	0	#DIV/0!	0	0	0	contigs_merge_contig_10549	0	296	0	#DIV/0!	0
contigs_merge_contig_1055	0.376908	0.376908	0.376908	1.28184	0.358215	0.358215	0.358215	1.85423	0.563639	0.563639	0.563639	1.30822	5.63639e-07	1.30822	0.274342	0.783822	1	5.63639e-07	1.30822	0.274342	0.783822	1	1.33732	1.8287	0.419343	55	89	1.33732	contigs_merge_contig_1055	0	3897	1.8287	0.419343	1.33732	1.71423	2.39234	0.777558	62	105	1.71423	contigs_merge_contig_1055	0	3897	2.39234	0.777558	1.71423
contigs_merge_contig_10550	0.425661	0.425661	-0.425661	-1.06419	0.0897508	0.0897508	-0.0897508	-1.03288	0.395445	0.395445	-0.395445	-1.04273	-3.95445e-07	-1.04273	-0.0909484	0.927534	1	-3.95445e-07	-1.04273	-0.0909484	0.927534	1	7.0573	9.65044	2.81912	37	37	7.0573	contigs_merge_contig_10550	0	307	9.65044	2.81912	7.0573	6.63164	9.25499	2.72937	32	32	6.63164	contigs_merge_contig_10550	0	307	9.25499	2.72937	6.63164
contigs_merge_contig_10551	0	0	0	1	#NUM!	0	#NUM!	#NUM!	0	0	0	1	0	1	0	1	1	0	1	0	1	1	0	0	#DIV/0!	0	0	0	contigs_merge_contig_10551	0	429	0	#DIV/0!	0	0	0	#DIV/0!	0	0	0	contigs_merge_contig_10551	0	429	0	#DIV/0!	0
contigs_merge_contig_10552	0.852913	0.852913	0.852913	1.98569	0.989642	0.989642	0.989642	-3.74108	1.21466	1.21466	1.21466	2.02656	1.21466e-06	2.02656	0.641867	0.52096	1	1.21466e-06	2.02656	0.641867	0.52096	1	0.865294	1.18324	-0.208738	33	58	0.865294	contigs_merge_contig_10552	0	3925	1.18324	-0.208738	0.865294	1.71821	2.3979	0.780904	67	106	1.71821	contigs_merge_contig_10552	0	3925	2.3979	0.780904	1.71821
contigs_merge_contig_10553	1.28163	1.28163	1.28163	2.72693	1.44728	1.44728	1.44728	-2.36395	1.8095	1.8095	1.8095	2.78305	1.8095e-06	2.78305	0.923507	0.355743	1	1.8095e-06	2.78305	0.923508	0.355743	1	0.742143	1.01484	-0.430231	51	51	0.742143	contigs_merge_contig_10553	0	4024	1.01484	-0.430231	0.742143	2.02377	2.82434	1.01705	124	128	2.02377	contigs_merge_contig_10553	0	4024	2.82434	1.01705	2.02377
contigs_merge_contig_10554	0	0	0	1	#NUM!	0	#NUM!	#NUM!	0	0	0	1	0	1	0	1	1	0	1	0	1	1	0	0	#DIV/0!	0	0	0	contigs_merge_contig_10554	0	601	0	#DIV/0!	0	0	0	#DIV/0!	0	0	0	contigs_merge_contig_10554	0	601	0	#DIV/0!	0
contigs_merge_contig_10555	0	0	0	1	#NUM!	0	#NUM!	#NUM!	0	0	0	1	0	1	0	1	1	0	1	0	1	1	0	0	#DIV/0!	0	0	0	contigs_merge_contig_10555	0	419	0	#DIV/0!	0	0	0	#DIV/0!	0	0	0	contigs_merge_contig_10555	0	419	0	#DIV/0!	0
contigs_merge_contig_10556	0	0	0	1	#NUM!	0	#NUM!	#NUM!	0	0	0	1	0	1	0	1	1	0	1	0	1	1	0	0	#DIV/0!	0	0	0	contigs_merge_contig_10556	0	499	0	#DIV/0!	0	0	0	#DIV/0!	0	0	0	contigs_merge_contig_10556	0	499	0	#DIV/0!	0
contigs_merge_contig_10557	0	0	0	1	#NUM!	0	#NUM!	#NUM!	0	0	0	1	0	1	0	1	1	0	1	0	1	1	0	0	#DIV/0!	0	0	0	contigs_merge_contig_10557	0	3487	0	#DIV/0!	0	0	0	#DIV/0!	0	0	0	contigs_merge_contig_10557	0	3487	0	#DIV/0!	0
contigs_merge_contig_10558	0.334596	0.334596	0.334596	1.90139	0.927057	0.927057	0.927057	0.351589	0.477402	0.477402	0.477402	1.94052	4.77402e-07	1.94052	0.390764	0.695972	1	4.77402e-07	1.94052	0.390764	0.695972	1	0.371198	0.507592	-1.42974	16	16	0.371198	contigs_merge_contig_10558	0	2524	0.507592	-1.42974	0.371198	0.705794	0.984993	-0.502681	28	28	0.705794	contigs_merge_contig_10558	0	2524	0.984993	-0.502681	0.705794
contigs_merge_contig_10559	0.497797	0.497797	-0.497797	-3.15558	1.65791	1.65791	-1.65791	-0.215916	0.674208	0.674208	-0.674208	-3.09195	-6.74208e-07	-3.09195	-0.587094	0.557141	1	-6.74208e-07	-3.09195	-0.587094	0.557141	1	0.72873	0.996496	-0.456543	46	48	0.72873	contigs_merge_contig_10559	0	3857	0.996496	-0.456543	0.72873	0.230934	0.322287	-2.11445	13	14	0.230934	contigs_merge_contig_10559	0	3857	0.322287	-2.11445	0.230934
contigs_merge_contig_1056	0.00191161	0.00191161	0.00191161	1.08651	0.119703	0.119703	0.119703	0.978236	0.00328964	0.00328964	0.00328964	1.10887	3.28964e-09	1.10887	0.0130318	0.989602	1	3.28964e-09	1.10887	0.0130318	0.989602	1	0.0220968	0.0302161	-5.50002	1	1	0.0220968	contigs_merge_contig_1056	0	2650	0.0302161	-5.50002	0.0220968	0.0240084	0.0335057	-5.38032	1	1	0.0240084	contigs_merge_contig_1056	0	2650	0.0335057	-5.38032	0.0240084
contigs_merge_contig_10560	0.278948	0.278948	0.278948	1.93157	0.949778	0.949778	0.949778	0.454049	0.397721	0.397721	0.397721	1.97133	3.97721e-07	1.97133	0.360576	0.718417	1	3.97721e-07	1.97133	0.360576	0.718417	1	0.299437	0.409462	-1.73968	9	9	0.299437	contigs_merge_contig_10560	0	1760	0.409462	-1.73968	0.299437	0.578385	0.807183	-0.789899	16	16	0.578385	contigs_merge_contig_10560	0	1760	0.807183	-0.789899	0.578385
contigs_merge_contig_10561	0.0178451	0.0178451	-0.0178451	-1.10445	0.143332	0.143332	-0.143332	-0.943775	0.0195945	0.0195945	-0.0195945	-1.08218	-1.95945e-08	-1.08218	-0.0278097	0.977814	1	-1.95945e-08	-1.08218	-0.0278097	0.977814	1	0.188689	0.258021	-2.40592	0	6	0.188689	contigs_merge_contig_10561	0	1862	0.258021	-2.40592	0.188689	0.170844	0.238427	-2.54925	0	5	0.170844	contigs_merge_contig_10561	0	1862	0.238427	-2.54925	0.170844
contigs_merge_contig_10562	0	0	0	1	#NUM!	0	#NUM!	#NUM!	0	0	0	1	0	1	0	1	1	0	1	0	1	1	0	0	#DIV/0!	0	0	0	contigs_merge_contig_10562	0	1454	0	#DIV/0!	0	0	0	#DIV/0!	0	0	0	contigs_merge_contig_10562	0	1454	0	#DIV/0!	0
contigs_merge_contig_10563	0.00336465	0.00336465	-0.00336465	-1.00405	0.00582836	0.00582836	-0.00582836	-0.978153	0.018789	0.018789	0.018789	1.01646	1.8789e-08	1.01646	0.012386	0.990118	1	1.8789e-08	1.01646	0.012386	0.990118	1	0.834535	1.14118	-0.260956	12	12	0.834535	contigs_merge_contig_10563	0	842	1.14118	-0.260956	0.834535	0.83117	1.15997	-0.266784	11	11	0.83117	contigs_merge_contig_10563	0	842	1.15997	-0.266784	0.83117
contigs_merge_contig_10564	0.301596	0.301596	0.301596	1.62977	0.704665	0.704665	0.704665	0.336599	0.434378	0.434378	0.434378	1.66331	4.34378e-07	1.66331	0.328913	0.742222	1	4.34378e-07	1.66331	0.328913	0.742222	1	0.478901	0.654869	-1.0622	22	22	0.478901	contigs_merge_contig_10564	0	2690	0.654869	-1.0622	0.478901	0.780497	1.08925	-0.357536	33	33	0.780497	contigs_merge_contig_10564	0	2690	1.08925	-0.357536	0.780497
contigs_merge_contig_10565	0.239728	0.239728	-0.239728	-1.38057	0.46526	0.46526	-0.46526	-0.302198	0.310087	0.310087	-0.310087	-1.35273	-3.10087e-07	-1.35273	-0.215613	0.829289	1	-3.10087e-07	-1.35273	-0.215613	0.829289	1	0.869651	1.1892	-0.201491	6	6	0.869651	contigs_merge_contig_10565	0	404	1.1892	-0.201491	0.869651	0.629924	0.87911	-0.666751	4	4	0.629924	contigs_merge_contig_10565	0	404	0.87911	-0.666751	0.629924
contigs_merge_contig_10566	1.11786	1.11786	-1.11786	-4.60189	2.20223	2.20223	-2.20223	0.304621	1.51987	1.51987	-1.51987	-4.50909	-1.51987e-06	-4.50909	-0.983921	0.325154	1	-1.51987e-06	-4.50909	-0.983922	0.325154	1	1.42821	1.95299	0.514206	5	5	1.42821	contigs_merge_contig_10566	0	205	1.95299	0.514206	1.42821	0.310353	0.433122	-1.68802	1	1	0.310353	contigs_merge_contig_10566	0	205	0.433122	-1.68802	0.310353
contigs_merge_contig_10567	1.49186	1.49186	1.49186	1.86259	0.89731	0.89731	0.89731	2.1353	2.13069	2.13069	2.13069	1.90092	2.13069e-06	1.90092	0.81346	0.415954	1	2.13069e-06	1.90092	0.81346	0.415954	1	1.72952	2.36501	0.79037	7	7	1.72952	contigs_merge_contig_10567	0	237	2.36501	0.79037	1.72952	3.22138	4.4957	1.68768	12	12	3.22138	contigs_merge_contig_10567	0	237	4.4957	1.68768	3.22138
contigs_merge_contig_10568	0.0864573	0.0864573	0.0864573	6.51906	2.70467	2.70467	2.70467	0.548944	0.121099	0.121099	0.121099	6.65322	1.21099e-07	6.65322	0.299086	0.764874	1	1.21099e-07	6.65322	0.299086	0.764874	1	0.0156652	0.0214212	-5.99629	1	1	0.0156652	contigs_merge_contig_10568	0	3738	0.0214212	-5.99629	0.0156652	0.102122	0.14252	-3.29163	6	6	0.102122	contigs_merge_contig_10568	0	3738	0.14252	-3.29163	0.102122
contigs_merge_contig_10569	0.882394	0.882394	0.882394	1.98288	0.987599	0.987599	0.987599	-5.34724	1.25672	1.25672	1.25672	2.02369	1.25672e-06	2.02369	0.652281	0.51422	1	1.25672e-06	2.02369	0.652281	0.51422	1	0.897762	1.22764	-0.155595	34	40	0.897762	contigs_merge_contig_10569	0	2609	1.22764	-0.155595	0.897762	1.78016	2.48435	0.832004	62	73	1.78016	contigs_merge_contig_10569	0	2609	2.48435	0.832004	1.78016
contigs_merge_contig_1057	0	0	0	1	#NUM!	0	#NUM!	#NUM!	0	0	0	1	0	1	0	1	1	0	1	0	1	1	0	0	#DIV/0!	0	0	0	contigs_merge_contig_1057	0	304	0	#DIV/0!	0	0	0	#DIV/0!	0	0	0	contigs_merge_contig_1057	0	304	0	#DIV/0!	0
contigs_merge_contig_10570	0	0	0	1	#NUM!	0	#NUM!	#NUM!	0	0	0	1	0	1	0	1	1	0	1	0	1	1	0	0	#DIV/0!	0	0	0	contigs_merge_contig_10570	0	4258	0	#DIV/0!	0	0	0	#DIV/0!	0	0	0	contigs_merge_contig_10570	0	4258	0	#DIV/0!	0
contigs_merge_contig_10571	0.0451094	0.0451094	-0.0451094	-1.38057	0.46526	0.46526	-0.46526	-0.848777	0.0583489	0.0583489	-0.0583489	-1.35273	-5.83489e-08	-1.35273	-0.0935299	0.925483	1	-5.83489e-08	-1.35273	-0.0935299	0.925483	1	0.163642	0.223771	-2.61139	6	6	0.163642	contigs_merge_contig_10571	0	2147	0.223771	-2.61139	0.163642	0.118532	0.165422	-3.07665	4	4	0.118532	contigs_merge_contig_10571	0	2147	0.165422	-3.07665	0.118532
contigs_merge_contig_10572	0.171935	0.171935	0.171935	1.51167	0.596141	0.596141	0.596141	0.6211	0.249405	0.249405	0.249405	1.54278	2.49405e-07	1.54278	0.230733	0.817523	1	2.49405e-07	1.54278	0.230733	0.817523	1	0.336028	0.459498	-1.57335	23	23	0.336028	contigs_merge_contig_10572	0	4008	0.459498	-1.57335	0.336028	0.507962	0.708903	-0.977206	31	32	0.507962	contigs_merge_contig_10572	0	4008	0.708903	-0.977206	0.507962
contigs_merge_contig_10573	0.106559	0.106559	0.106559	1.15737	0.21085	0.21085	0.21085	0.62516	0.167767	0.167767	0.167767	1.18119	1.67767e-07	1.18119	0.118052	0.906027	1	1.67767e-07	1.18119	0.118052	0.906027	1	0.677124	0.925927	-0.562507	14	46	0.677124	contigs_merge_contig_10573	0	3978	0.925927	-0.562507	0.677124	0.783683	1.09369	-0.351657	10	49	0.783683	contigs_merge_contig_10573	0	3978	1.09369	-0.351657	0.783683
contigs_merge_contig_10574	0.556468	0.556468	0.556468	4.672	2.22404	2.22404	2.22404	0.182997	0.780862	0.780862	0.780862	4.76814	7.80862e-07	4.76814	0.714221	0.47509	1	7.80862e-07	4.76814	0.714221	0.47509	1	0.151544	0.207227	-2.72219	10	10	0.151544	contigs_merge_contig_10574	0	3864	0.207227	-2.72219	0.151544	0.708012	0.988089	-0.498154	43	43	0.708012	contigs_merge_contig_10574	0	3864	0.988089	-0.498154	0.708012
contigs_merge_contig_10575	0.126653	0.126653	0.126653	1.7609	0.81631	0.81631	0.81631	0.684435	0.181438	0.181438	0.181438	1.79713	1.81438e-07	1.79713	0.227391	0.82012	1	1.81438e-07	1.79713	0.227391	0.82012	1	0.166452	0.227613	-2.58683	25	29	0.166452	contigs_merge_contig_10575	0	10202	0.227613	-2.58683	0.166452	0.293104	0.409051	-1.77051	40	47	0.293104	contigs_merge_contig_10575	0	10202	0.409051	-1.77051	0.293104
contigs_merge_contig_10576	0.226963	0.226963	-0.226963	#DIV/0!	#DIV/0!	0	#DIV/0!	0	0.310359	0.310359	-0.310359	#DIV/0!	-3.10359e-07	#DIV/0!	-0.557099	0.57746	1	-3.10359e-07	#DIV/0!	-0.557099	0.57746	1	0.226963	0.310359	-2.13947	2	2	0.226963	contigs_merge_contig_10576	0	516	0.310359	-2.13947	0.226963	0	0	#DIV/0!	0	0	0	contigs_merge_contig_10576	0	516	0	#DIV/0!	0
contigs_merge_contig_10577	0	0	0	1	#NUM!	0	#NUM!	#NUM!	0	0	0	1	0	1	0	1	1	0	1	0	1	1	0	0	#DIV/0!	0	0	0	contigs_merge_contig_10577	0	336	0	#DIV/0!	0	0	0	#DIV/0!	0	0	0	contigs_merge_contig_10577	0	336	0	#DIV/0!	0
contigs_merge_contig_10578	2.45016	2.45016	2.45016	1.49188	0.577127	0.577127	0.577127	1.24914	3.55958	3.55958	3.55958	1.52258	3.55958e-06	1.52258	0.858725	0.390492	1	3.55958e-06	1.52258	0.858726	0.390492	1	4.98127	6.81158	2.31651	121	327	4.98127	contigs_merge_contig_10578	0	3844	6.81158	2.31651	4.98127	7.43143	10.3712	2.89364	187	449	7.43143	contigs_merge_contig_10578	0	3844	10.3712	2.89364	7.43143
contigs_merge_contig_10579	0.268083	0.268083	0.268083	1.25807	0.331207	0.331207	0.331207	7.0282	0.403365	0.403365	0.403365	1.28396	4.03365e-07	1.28396	0.223939	0.822804	1	4.03365e-07	1.28396	0.223939	0.822805	1	1.03882	1.42052	0.0549429	35	38	1.03882	contigs_merge_contig_10579	0	2142	1.42052	0.0549429	1.03882	1.3069	1.82389	0.38615	44	44	1.3069	contigs_merge_contig_10579	0	2142	1.82389	0.38615	1.3069
contigs_merge_contig_1058	1.35109	1.35109	1.35109	2.77664	1.47334	1.47334	1.47334	-2.72971	1.90695	1.90695	1.90695	2.83378	1.90695e-06	2.83378	0.95506	0.339547	1	1.90695e-06	2.83378	0.95506	0.339547	1	0.760474	1.0399	-0.395028	9	9	0.760474	contigs_merge_contig_1058	0	693	1.0399	-0.395028	0.760474	2.11156	2.94686	1.07831	17	23	2.11156	contigs_merge_contig_1058	0	693	2.94686	1.07831	2.11156
contigs_merge_contig_10580	0.315499	0.315499	-0.315499	#DIV/0!	#DIV/0!	0	#DIV/0!	0	0.431425	0.431425	-0.431425	#DIV/0!	-4.31425e-07	#DIV/0!	-0.65683	0.51129	1	-4.31425e-07	#DIV/0!	-0.65683	0.51129	1	0.315499	0.431425	-1.66429	5	5	0.315499	contigs_merge_contig_10580	0	928	0.431425	-1.66429	0.315499	0	0	#DIV/0!	0	0	0	contigs_merge_contig_10580	0	928	0	#DIV/0!	0
contigs_merge_contig_10581	4.1609	4.1609	4.1609	1.73984	0.798953	0.798953	0.798953	1.32066	5.96514	5.96514	5.96514	1.77564	5.96514e-06	1.77564	1.29111	0.196667	1	5.96514e-06	1.77564	1.29111	0.196667	1	5.62407	7.69059	2.49162	121	153	5.62407	contigs_merge_contig_10581	0	1593	7.69059	2.49162	5.62407	9.78497	13.6557	3.29057	200	245	9.78497	contigs_merge_contig_10581	0	1593	13.6557	3.29057	9.78497
contigs_merge_contig_10582	0.0381297	0.0381297	0.0381297	1.35814	0.441631	0.441631	0.441631	0.863337	0.0562092	0.0562092	0.0562092	1.38609	5.62092e-08	1.38609	0.0953682	0.924022	1	5.62092e-08	1.38609	0.0953682	0.924022	1	0.106466	0.145586	-3.23153	4	4	0.106466	contigs_merge_contig_10582	0	2200	0.145586	-3.23153	0.106466	0.144596	0.201796	-2.7899	5	5	0.144596	contigs_merge_contig_10582	0	2200	0.201796	-2.7899	0.144596
contigs_merge_contig_10583	0.0359132	0.0359132	-0.0359132	#DIV/0!	#DIV/0!	0	#DIV/0!	0	0.0491092	0.0491092	-0.0491092	#DIV/0!	-4.91092e-08	#DIV/0!	-0.221606	0.824621	1	-4.91092e-08	#DIV/0!	-0.221606	0.824621	1	0.0359132	0.0491092	-4.79934	2	2	0.0359132	contigs_merge_contig_10583	0	3261	0.0491092	-4.79934	0.0359132	0	0	#DIV/0!	0	0	0	contigs_merge_contig_10583	0	3261	0	#DIV/0!	0
contigs_merge_contig_10584	3.70674	3.70674	3.70674	1.43653	0.522586	0.522586	0.522586	1.16934	5.41201	5.41201	5.41201	1.46609	5.41201e-06	1.46609	1.01138	0.311836	1	5.41201e-06	1.46609	1.01138	0.311836	1	8.49141	11.6115	3.086	68	298	8.49141	contigs_merge_contig_10584	0	2055	11.6115	3.086	8.49141	12.1981	17.0235	3.60859	79	394	12.1981	contigs_merge_contig_10584	0	2055	17.0235	3.60859	12.1981
contigs_merge_contig_10585	0.083933	0.083933	-0.083933	-1.09161	0.126458	0.126458	-0.126458	0.00146526	0.0889908	0.0889908	-0.0889908	-1.0696	-8.89908e-08	-1.0696	-0.0547055	0.956373	1	-8.89908e-08	-1.0696	-0.0547055	0.956373	1	1.00013	1.36762	0.000185022	35	51	1.00013	contigs_merge_contig_10585	0	2986	1.36762	0.000185022	1.00013	0.916195	1.27863	-0.126273	38	43	0.916195	contigs_merge_contig_10585	0	2986	1.27863	-0.126273	0.916195
contigs_merge_contig_10586	0	0	0	1	#NUM!	0	#NUM!	#NUM!	0	0	0	1	0	1	0	1	1	0	1	0	1	1	0	0	#DIV/0!	0	0	0	contigs_merge_contig_10586	0	1293	0	#DIV/0!	0	0	0	#DIV/0!	0	0	0	contigs_merge_contig_10586	0	1293	0	#DIV/0!	0
contigs_merge_contig_10587	0.174042	0.174042	0.174042	3.80279	1.92706	1.92706	1.92706	0.51936	0.244637	0.244637	0.244637	3.88105	2.44637e-07	3.88105	0.379997	0.703948	1	2.44637e-07	3.88105	0.379997	0.703948	1	0.062096	0.0849126	-4.00936	2	4	0.062096	contigs_merge_contig_10587	0	3772	0.0849126	-4.00936	0.062096	0.236138	0.32955	-2.0823	14	14	0.236138	contigs_merge_contig_10587	0	3772	0.32955	-2.0823	0.236138
contigs_merge_contig_10588	0.0109887	0.0109887	0.0109887	1.08651	0.119703	0.119703	0.119703	0.959789	0.0189101	0.0189101	0.0189101	1.10887	1.89101e-08	1.10887	0.0312447	0.975074	1	1.89101e-08	1.10887	0.0312447	0.975074	1	0.127021	0.173693	-2.97686	1	1	0.127021	contigs_merge_contig_10588	0	461	0.173693	-2.97686	0.127021	0.138009	0.192603	-2.85716	1	1	0.138009	contigs_merge_contig_10588	0	461	0.192603	-2.85716	0.138009
contigs_merge_contig_10589	0.0305505	0.0305505	-0.0305505	-1.03232	0.0458835	0.0458835	-0.0458835	-0.433648	0.0151718	0.0151718	-0.0151718	-1.0115	-1.51718e-08	-1.0115	-0.00931308	0.992569	1	-1.51718e-08	-1.0115	-0.00931308	0.992569	1	0.975942	1.33454	-0.0351325	83	83	0.975942	contigs_merge_contig_10589	0	4980	1.33454	-0.0351325	0.975942	0.945392	1.31937	-0.081016	74	74	0.945392	contigs_merge_contig_10589	0	4980	1.31937	-0.081016	0.945392
contigs_merge_contig_1059	0.161429	0.161429	0.161429	1.40988	0.495569	0.495569	0.495569	0.631354	0.23637	0.23637	0.23637	1.43889	2.3637e-07	1.43889	0.206243	0.836601	1	2.3637e-07	1.43889	0.206243	0.836601	1	0.393846	0.538562	-1.34429	79	84	0.393846	contigs_merge_contig_1059	0	12489	0.538562	-1.34429	0.393846	0.555275	0.774932	-0.848725	107	109	0.555275	contigs_merge_contig_1059	0	12489	0.774932	-0.848725	0.555275
contigs_merge_contig_10590	0	0	0	1	#NUM!	0	#NUM!	#NUM!	0	0	0	1	0	1	0	1	1	0	1	0	1	1	0	0	#DIV/0!	0	0	0	contigs_merge_contig_10590	0	564	0	#DIV/0!	0	0	0	#DIV/0!	0	0	0	contigs_merge_contig_10590	0	564	0	#DIV/0!	0
contigs_merge_contig_10591	0	0	0	1	#NUM!	0	#NUM!	#NUM!	0	0	0	1	0	1	0	1	1	0	1	0	1	1	0	0	#DIV/0!	0	0	0	contigs_merge_contig_10591	0	627	0	#DIV/0!	0	0	0	#DIV/0!	0	0	0	contigs_merge_contig_10591	0	627	0	#DIV/0!	0
contigs_merge_contig_10592	3.35527	3.35527	3.35527	1.29267	0.370353	0.370353	0.370353	1.10524	5.00517	5.00517	5.00517	1.31927	5.00517e-06	1.31927	0.830076	0.406496	1	5.00517e-06	1.31927	0.830076	0.406496	1	11.4644	15.6769	3.51909	105	195	11.4644	contigs_merge_contig_10592	0	996	15.6769	3.51909	11.4644	14.8197	20.682	3.88944	136	232	14.8197	contigs_merge_contig_10592	0	996	20.682	3.88944	14.8197
contigs_merge_contig_10593	5.94761	5.94761	5.94761	1.21857	0.285193	0.285193	0.285193	1.05984	9.06613	9.06613	9.06613	1.24365	9.06613e-06	1.24365	0.992261	0.32107	1	9.06613e-06	1.24365	0.992261	0.32107	1	27.2111	37.2096	4.76612	362	362	27.2111	contigs_merge_contig_10593	0	779	37.2096	4.76612	27.2111	33.1587	46.2757	5.05132	406	406	33.1587	contigs_merge_contig_10593	0	779	46.2757	5.05132	33.1587
contigs_merge_contig_10594	11.28	11.28	11.28	1.10623	0.14565	0.14565	0.14565	1.02164	18.7303	18.7303	18.7303	1.12899	1.87303e-05	1.12899	1.06538	0.286704	1	1.87303e-05	1.12899	1.06538	0.286704	1	106.186	145.203	6.73045	4848	4849	106.186	contigs_merge_contig_10594	0	2674	145.203	6.73045	106.186	117.466	163.933	6.8761	4936	4937	117.466	contigs_merge_contig_10594	0	2674	163.933	6.8761	117.466
contigs_merge_contig_10595	0.21137	0.21137	0.21137	#DIV/0!	#DIV/0!	0	#DIV/0!	0	0.294984	0.294984	0.294984	#DIV/0!	2.94984e-07	#DIV/0!	0.543124	0.587044	1	2.94984e-07	#DIV/0!	0.543124	0.587044	1	0	0	#DIV/0!	0	0	0	contigs_merge_contig_10595	0	301	0	#DIV/0!	0	0.21137	0.294984	-2.24216	1	1	0.21137	contigs_merge_contig_10595	0	301	0.294984	-2.24216	0.21137
contigs_merge_contig_10596	0.159498	0.159498	-0.159498	-2.76113	1.46526	1.46526	-1.46526	-0.577113	0.215555	0.215555	-0.215555	-2.70546	-2.15555e-07	-2.70546	-0.314977	0.752779	1	-2.15555e-07	-2.70546	-0.314977	0.752779	1	0.250063	0.341947	-1.99963	6	6	0.250063	contigs_merge_contig_10596	0	1405	0.341947	-1.99963	0.250063	0.0905656	0.126392	-3.46489	2	2	0.0905656	contigs_merge_contig_10596	0	1405	0.126392	-3.46489	0.0905656
contigs_merge_contig_10597	0.0132266	0.0132266	0.0132266	1.08651	0.119703	0.119703	0.119703	0.95582	0.0227612	0.0227612	0.0227612	1.10887	2.27612e-08	1.10887	0.034279	0.972655	1	2.27612e-08	1.10887	0.034279	0.972655	1	0.152889	0.209067	-2.70944	0	2	0.152889	contigs_merge_contig_10597	0	766	0.209067	-2.70944	0.152889	0.166116	0.231828	-2.58974	0	2	0.166116	contigs_merge_contig_10597	0	766	0.231828	-2.58974	0.166116
contigs_merge_contig_10598	0	0	0	1	#NUM!	0	#NUM!	#NUM!	0	0	0	1	0	1	0	1	1	0	1	0	1	1	0	0	#DIV/0!	0	0	0	contigs_merge_contig_10598	0	1144	0	#DIV/0!	0	0	0	#DIV/0!	0	0	0	contigs_merge_contig_10598	0	1144	0	#DIV/0!	0
contigs_merge_contig_10599	0.265515	0.265515	-0.265515	-2.76113	1.46526	1.46526	-1.46526	-0.463204	0.358833	0.358833	-0.358833	-2.70546	-3.58833e-07	-2.70546	-0.406393	0.684454	1	-3.58833e-07	-2.70546	-0.406393	0.684454	1	0.416279	0.569236	-1.26438	3	3	0.416279	contigs_merge_contig_10599	0	422	0.569236	-1.26438	0.416279	0.150764	0.210403	-2.72964	1	1	0.150764	contigs_merge_contig_10599	0	422	0.210403	-2.72964	0.150764
contigs_merge_contig_106	0.0602792	0.0602792	0.0602792	1.16412	0.219238	0.219238	0.219238	0.848279	0.0944604	0.0944604	0.0944604	1.18808	9.44604e-08	1.18808	0.0901073	0.928202	1	9.44604e-08	1.18808	0.0901073	0.928202	1	0.36729	0.502247	-1.44501	14	14	0.36729	contigs_merge_contig_106	0	2232	0.502247	-1.44501	0.36729	0.427569	0.596708	-1.22577	15	15	0.427569	contigs_merge_contig_106	0	2232	0.596708	-1.22577	0.427569
contigs_merge_contig_1060	1.1072	1.1072	1.1072	3.25953	1.70467	1.70467	1.70467	-0.656448	1.55898	1.55898	1.55898	3.32661	1.55898e-06	3.32661	0.915605	0.359874	1	1.55898e-06	3.32661	0.915605	0.359874	1	0.490013	0.670063	-1.02911	2	2	0.490013	contigs_merge_contig_1060	0	239	0.670063	-1.02911	0.490013	1.59721	2.22904	0.675556	6	6	1.59721	contigs_merge_contig_1060	0	239	2.22904	0.675556	1.59721
contigs_merge_contig_10600	0.466298	0.466298	0.466298	2.03721	1.02659	1.02659	1.02659	0.109927	0.663408	0.663408	0.663408	2.07913	6.63408e-07	2.07913	0.482185	0.629675	1	6.63408e-07	2.07913	0.482185	0.629675	1	0.44957	0.614761	-1.15338	8	8	0.44957	contigs_merge_contig_10600	0	1042	0.614761	-1.15338	0.44957	0.915868	1.27817	-0.126788	15	15	0.915868	contigs_merge_contig_10600	0	1042	1.27817	-0.126788	0.915868
contigs_merge_contig_10601	0.424787	0.424787	0.424787	2.17302	1.1197	1.1197	1.1197	0.235916	0.603016	0.603016	0.603016	2.21774	6.03016e-07	2.21774	0.477712	0.632855	1	6.03016e-07	2.21774	0.477712	0.632855	1	0.362131	0.495192	-1.46542	20	20	0.362131	contigs_merge_contig_10601	0	3234	0.495192	-1.46542	0.362131	0.786918	1.09821	-0.345715	40	40	0.786918	contigs_merge_contig_10601	0	3234	1.09821	-0.345715	0.786918
contigs_merge_contig_10602	1.64711	1.64711	1.64711	1.62977	0.704665	0.704665	0.704665	1.50803	2.37227	2.37227	2.37227	1.66331	2.37227e-06	1.66331	0.768652	0.4421	1	2.37227e-06	1.66331	0.768652	0.4421	1	2.61543	3.57644	1.38705	74	90	2.61543	contigs_merge_contig_10602	0	2015	3.57644	1.38705	2.61543	4.26254	5.94872	2.09171	133	135	4.26254	contigs_merge_contig_10602	0	2015	5.94872	2.09171	4.26254
contigs_merge_contig_10603	0.432676	0.432676	0.432676	1.24173	0.312348	0.312348	0.312348	1.37188	0.654205	0.654205	0.654205	1.26728	6.54205e-07	1.26728	0.277708	0.781236	1	6.54205e-07	1.26728	0.277708	0.781237	1	1.78994	2.44763	0.839909	7	7	1.78994	contigs_merge_contig_10603	0	229	2.44763	0.839909	1.78994	2.22261	3.10184	1.15226	8	8	2.22261	contigs_merge_contig_10603	0	229	3.10184	1.15226	2.22261
contigs_merge_contig_10604	0.556037	0.556037	-0.556037	-1.84075	0.880297	0.880297	-0.880297	0.47576	0.741736	0.741736	-0.741736	-1.80364	-7.41736e-07	-1.80364	-0.461099	0.644728	1	-7.41736e-07	-1.80364	-0.461099	0.644728	1	1.21739	1.66471	0.283793	10	10	1.21739	contigs_merge_contig_10604	0	481	1.66471	0.283793	1.21739	0.661354	0.922974	-0.596504	5	5	0.661354	contigs_merge_contig_10604	0	481	0.922974	-0.596504	0.661354
contigs_merge_contig_10605	0	0	0	1	#NUM!	0	#NUM!	#NUM!	0	0	0	1	0	1	0	1	1	0	1	0	1	1	0	0	#DIV/0!	0	0	0	contigs_merge_contig_10605	0	2064	0	#DIV/0!	0	0	0	#DIV/0!	0	0	0	contigs_merge_contig_10605	0	2064	0	#DIV/0!	0
contigs_merge_contig_10606	0	0	0	1	#NUM!	0	#NUM!	#NUM!	0	0	0	1	0	1	0	1	1	0	1	0	1	1	0	0	#DIV/0!	0	0	0	contigs_merge_contig_10606	0	244	0	#DIV/0!	0	0	0	#DIV/0!	0	0	0	contigs_merge_contig_10606	0	244	0	#DIV/0!	0
contigs_merge_contig_10607	0.328136	0.328136	0.328136	1.29778	0.376042	0.376042	0.376042	3.68483	0.48895	0.48895	0.48895	1.32448	4.8895e-07	1.32448	0.261256	0.793895	1	4.8895e-07	1.32448	0.261256	0.793895	1	1.10195	1.50685	0.140062	27	36	1.10195	contigs_merge_contig_10607	0	1913	1.50685	0.140062	1.10195	1.43009	1.9958	0.516104	29	43	1.43009	contigs_merge_contig_10607	0	1913	1.9958	0.516104	1.43009
contigs_merge_contig_10608	1.01541	1.01541	1.01541	3.21015	1.68264	1.68264	1.68264	-0.49957	1.43001	1.43001	1.43001	3.27621	1.43001e-06	3.27621	0.872463	0.382956	1	1.43001e-06	3.27621	0.872463	0.382956	1	0.459431	0.628244	-1.12208	22	22	0.459431	contigs_merge_contig_10608	0	2804	0.628244	-1.12208	0.459431	1.47484	2.05826	0.560558	65	65	1.47484	contigs_merge_contig_10608	0	2804	2.05826	0.560558	1.47484
contigs_merge_contig_10609	0.195761	0.195761	0.195761	#DIV/0!	#DIV/0!	0	#DIV/0!	0	0.2732	0.2732	0.2732	#DIV/0!	2.732e-07	#DIV/0!	0.522686	0.601193	1	2.732e-07	#DIV/0!	0.522686	0.601193	1	0	0	#DIV/0!	0	0	0	contigs_merge_contig_10609	0	325	0	#DIV/0!	0	0.195761	0.2732	-2.35284	1	1	0.195761	contigs_merge_contig_10609	0	325	0.2732	-2.35284	0.195761
contigs_merge_contig_1061	0.807083	0.807083	-0.807083	-1.38057	0.46526	0.46526	-0.46526	-1.42898	1.04396	1.04396	-1.04396	-1.35273	-1.04396e-06	-1.35273	-0.395618	0.692387	1	-1.04396e-06	-1.35273	-0.395618	0.692387	1	2.92783	4.00363	1.54983	24	24	2.92783	contigs_merge_contig_1061	0	480	4.00363	1.54983	2.92783	2.12074	2.95967	1.08457	16	16	2.12074	contigs_merge_contig_1061	0	480	2.95967	1.08457	2.12074
contigs_merge_contig_10610	0.115793	0.115793	-0.115793	-1.68736	0.754767	0.754767	-0.754767	-0.70626	0.1536	0.1536	-0.1536	-1.65333	-1.536e-07	-1.65333	-0.194477	0.845803	1	-1.536e-07	-1.65333	-0.194477	0.845803	1	0.284255	0.388702	-1.81474	3	11	0.284255	contigs_merge_contig_10610	0	2266	0.388702	-1.81474	0.284255	0.168462	0.235102	-2.56951	2	6	0.168462	contigs_merge_contig_10610	0	2266	0.235102	-2.56951	0.168462
contigs_merge_contig_10611	1.04691	1.04691	1.04691	1.6515	0.723774	0.723774	0.723774	2.05767	1.50627	1.50627	1.50627	1.68548	1.50627e-06	1.68548	0.620067	0.535213	1	1.50627e-06	1.68548	0.620067	0.535213	1	1.60693	2.19738	0.684307	0	25	1.60693	contigs_merge_contig_10611	0	911	2.19738	0.684307	1.60693	2.65384	3.70365	1.40808	2	38	2.65384	contigs_merge_contig_10611	0	911	3.70365	1.40808	2.65384
contigs_merge_contig_10612	0.0085139	0.0085139	0.0085139	1.08651	0.119703	0.119703	0.119703	0.964214	0.0146513	0.0146513	0.0146513	1.10887	1.46513e-08	1.10887	0.0275023	0.978059	1	1.46513e-08	1.10887	0.0275023	0.978059	1	0.0984143	0.134576	-3.34499	1	1	0.0984143	contigs_merge_contig_10612	0	595	0.134576	-3.34499	0.0984143	0.106928	0.149227	-3.22529	1	1	0.106928	contigs_merge_contig_10612	0	595	0.149227	-3.22529	0.106928
contigs_merge_contig_10613	0	0	0	1	#NUM!	0	#NUM!	#NUM!	0	0	0	1	0	1	0	1	1	0	1	0	1	1	0	0	#DIV/0!	0	0	0	contigs_merge_contig_10613	0	300	0	#DIV/0!	0	0	0	#DIV/0!	0	0	0	contigs_merge_contig_10613	0	300	0	#DIV/0!	0
contigs_merge_contig_10614	0	0	0	1	#NUM!	0	#NUM!	#NUM!	0	0	0	1	0	1	0	1	1	0	1	0	1	1	0	0	#DIV/0!	0	0	0	contigs_merge_contig_10614	0	269	0	#DIV/0!	0	0	0	#DIV/0!	0	0	0	contigs_merge_contig_10614	0	269	0	#DIV/0!	0
contigs_merge_contig_10615	0.194648	0.194648	0.194648	1.97547	0.982199	0.982199	0.982199	0.577592	0.277263	0.277263	0.277263	2.01613	2.77263e-07	2.01613	0.305629	0.759887	1	2.77263e-07	2.01613	0.305629	0.759887	1	0.199542	0.272862	-2.32524	11	11	0.199542	contigs_merge_contig_10615	0	3228	0.272862	-2.32524	0.199542	0.39419	0.550125	-1.34304	20	20	0.39419	contigs_merge_contig_10615	0	3228	0.550125	-1.34304	0.39419
contigs_merge_contig_10616	0.175319	0.175319	-0.175319	#DIV/0!	#DIV/0!	0	#DIV/0!	0	0.239738	0.239738	-0.239738	#DIV/0!	-2.39738e-07	#DIV/0!	-0.489631	0.624395	1	-2.39738e-07	#DIV/0!	-0.489631	0.624395	1	0.175319	0.239738	-2.51195	1	1	0.175319	contigs_merge_contig_10616	0	334	0.239738	-2.51195	0.175319	0	0	#DIV/0!	0	0	0	contigs_merge_contig_10616	0	334	0	#DIV/0!	0
contigs_merge_contig_10617	0.331241	0.331241	0.331241	2.30884	1.20717	1.20717	1.20717	0.391037	0.469396	0.469396	0.469396	2.35635	4.69396e-07	2.35635	0.435534	0.663175	1	4.69396e-07	2.35635	0.435534	0.663175	1	0.253081	0.346073	-1.98233	8	8	0.253081	contigs_merge_contig_10617	0	1851	0.346073	-1.98233	0.253081	0.584322	0.815468	-0.775166	17	17	0.584322	contigs_merge_contig_10617	0	1851	0.815468	-0.775166	0.584322
contigs_merge_contig_10618	0.140542	0.140542	0.140542	1.37903	0.463657	0.463657	0.463657	0.676063	0.206573	0.206573	0.206573	1.40741	2.06573e-07	1.40741	0.186973	0.851682	1	2.06573e-07	1.40741	0.186973	0.851682	1	0.370791	0.507035	-1.43132	26	26	0.370791	contigs_merge_contig_10618	0	4106	0.507035	-1.43132	0.370791	0.511334	0.713608	-0.967663	33	33	0.511334	contigs_merge_contig_10618	0	4106	0.713608	-0.967663	0.511334
contigs_merge_contig_10619	0.0291326	0.0291326	-0.0291326	#DIV/0!	#DIV/0!	0	#DIV/0!	0	0.0398371	0.0398371	-0.0398371	#DIV/0!	-3.98371e-08	#DIV/0!	-0.199592	0.841799	1	-3.98371e-08	#DIV/0!	-0.199592	0.841799	1	0.0291326	0.0398371	-5.10122	1	1	0.0291326	contigs_merge_contig_10619	0	2010	0.0398371	-5.10122	0.0291326	0	0	#DIV/0!	0	0	0	contigs_merge_contig_10619	0	2010	0	#DIV/0!	0
contigs_merge_contig_1062	0.308194	0.308194	0.308194	2.13422	1.09371	1.09371	1.09371	0.418175	0.437757	0.437757	0.437757	2.17814	4.37757e-07	2.17814	0.402836	0.687069	1	4.37757e-07	2.17814	0.402836	0.687069	1	0.271724	0.371566	-1.87979	23	28	0.271724	contigs_merge_contig_1062	0	6034	0.371566	-1.87979	0.271724	0.579918	0.809323	-0.786079	40	55	0.579918	contigs_merge_contig_1062	0	6034	0.809323	-0.786079	0.579918
contigs_merge_contig_10620	0.05648	0.05648	-0.05648	-1.15047	0.202226	0.202226	-0.202226	-0.856951	0.0666702	0.0666702	-0.0666702	-1.12727	-6.66702e-08	-1.12727	-0.0631572	0.949641	1	-6.66702e-08	-1.12727	-0.0631572	0.949641	1	0.431833	0.590506	-1.21146	1	5	0.431833	contigs_merge_contig_10620	0	678	0.590506	-1.21146	0.431833	0.375353	0.523835	-1.41368	0	4	0.375353	contigs_merge_contig_10620	0	678	0.523835	-1.41368	0.375353
contigs_merge_contig_10621	1.43148	1.43148	1.43148	2.32824	1.21924	1.21924	1.21924	12.29	2.02807	2.02807	2.02807	2.37615	2.02807e-06	2.37615	0.90921	0.363239	1	2.02807e-06	2.37615	0.909211	0.363239	1	1.07773	1.47373	0.107992	21	21	1.07773	contigs_merge_contig_10621	0	1141	1.47373	0.107992	1.07773	2.50921	3.5018	1.32723	45	45	2.50921	contigs_merge_contig_10621	0	1141	3.5018	1.32723	2.50921
contigs_merge_contig_10622	0.358144	0.358144	-0.358144	#DIV/0!	#DIV/0!	0	#DIV/0!	0	0.48974	0.48974	-0.48974	#DIV/0!	-4.8974e-07	#DIV/0!	-0.699815	0.484043	1	-4.8974e-07	#DIV/0!	-0.699815	0.484043	1	0.358144	0.48974	-1.48139	2	2	0.358144	contigs_merge_contig_10622	0	327	0.48974	-1.48139	0.358144	0	0	#DIV/0!	0	0	0	contigs_merge_contig_10622	0	327	0	#DIV/0!	0
contigs_merge_contig_10623	0.0179003	0.0179003	0.0179003	1.08651	0.119703	0.119703	0.119703	0.947335	0.030804	0.030804	0.030804	1.10887	3.0804e-08	1.10887	0.039878	0.96819	1	3.0804e-08	1.10887	0.039878	0.96819	1	0.206914	0.282942	-2.2729	0	1	0.206914	contigs_merge_contig_10623	0	283	0.282942	-2.2729	0.206914	0.224814	0.313746	-2.1532	1	1	0.224814	contigs_merge_contig_10623	0	283	0.313746	-2.1532	0.224814
contigs_merge_contig_10624	0.0116857	0.0116857	0.0116857	1.08651	0.119703	0.119703	0.119703	0.958554	0.0201097	0.0201097	0.0201097	1.10887	2.01097e-08	1.10887	0.0322205	0.974296	1	2.01097e-08	1.10887	0.0322205	0.974296	1	0.135078	0.184712	-2.88813	2	2	0.135078	contigs_merge_contig_10624	0	867	0.184712	-2.88813	0.135078	0.146764	0.204821	-2.76843	2	2	0.146764	contigs_merge_contig_10624	0	867	0.204821	-2.76843	0.146764
contigs_merge_contig_10625	0	0	0	1	#NUM!	0	#NUM!	#NUM!	0	0	0	1	0	1	0	1	1	0	1	0	1	1	0	0	#DIV/0!	0	0	0	contigs_merge_contig_10625	0	2378	0	#DIV/0!	0	0	0	#DIV/0!	0	0	0	contigs_merge_contig_10625	0	2378	0	#DIV/0!	0
contigs_merge_contig_10626	0.319471	0.319471	0.319471	1.15894	0.212812	0.212812	0.212812	1.2113	0.50241	0.50241	0.50241	1.1828	5.0241e-07	1.1828	0.205119	0.837479	1	5.0241e-07	1.1828	0.205119	0.837479	1	2.00995	2.74849	1.00716	15	15	2.00995	contigs_merge_contig_10626	0	437	2.74849	1.00716	2.00995	2.32942	3.2509	1.21997	15	16	2.32942	contigs_merge_contig_10626	0	437	3.2509	1.21997	2.32942
contigs_merge_contig_10627	0	0	0	1	#NUM!	0	#NUM!	#NUM!	0	0	0	1	0	1	0	1	1	0	1	0	1	1	0	0	#DIV/0!	0	0	0	contigs_merge_contig_10627	0	824	0	#DIV/0!	0	0	0	#DIV/0!	0	0	0	contigs_merge_contig_10627	0	824	0	#DIV/0!	0
contigs_merge_contig_10628	0.788181	0.788181	0.788181	7.60558	2.92706	2.92706	2.92706	0.0456553	1.10333	1.10333	1.10333	7.76209	1.10333e-06	7.76209	0.922761	0.356132	1	1.10333e-06	7.76209	0.922761	0.356132	1	0.11932	0.163164	-3.06709	4	4	0.11932	contigs_merge_contig_10628	0	1963	0.163164	-3.06709	0.11932	0.907501	1.26649	-0.140029	4	28	0.907501	contigs_merge_contig_10628	0	1963	1.26649	-0.140029	0.907501
contigs_merge_contig_10629	0.0721873	0.0721873	-0.0721873	-1.84075	0.880297	0.880297	-0.880297	-0.75146	0.0962956	0.0962956	-0.0962956	-1.80364	-9.62956e-08	-1.80364	-0.166139	0.868047	1	-9.62956e-08	-1.80364	-0.166139	0.868047	1	0.158047	0.21612	-2.66157	2	2	0.158047	contigs_merge_contig_10629	0	741	0.21612	-2.66157	0.158047	0.0858601	0.119825	-3.54187	1	1	0.0858601	contigs_merge_contig_10629	0	741	0.119825	-3.54187	0.0858601
contigs_merge_contig_1063	0.122831	0.122831	-0.122831	-1.22717	0.295335	0.295335	-0.295335	-0.667079	0.152748	0.152748	-0.152748	-1.20242	-1.52748e-07	-1.20242	-0.118487	0.905682	1	-1.52748e-07	-1.20242	-0.118487	0.905682	1	0.66353	0.907338	-0.591766	4	4	0.66353	contigs_merge_contig_1063	0	353	0.907338	-0.591766	0.66353	0.540699	0.75459	-0.887101	3	3	0.540699	contigs_merge_contig_1063	0	353	0.75459	-0.887101	0.540699
contigs_merge_contig_10630	0	0	0	1	#NUM!	0	#NUM!	#NUM!	0	0	0	1	0	1	0	1	1	0	1	0	1	1	0	0	#DIV/0!	0	0	0	contigs_merge_contig_10630	0	276	0	#DIV/0!	0	0	0	#DIV/0!	0	0	0	contigs_merge_contig_10630	0	276	0	#DIV/0!	0
contigs_merge_contig_10631	0.140028	0.140028	-0.140028	-1.84075	0.880297	0.880297	-0.880297	-0.659587	0.186793	0.186793	-0.186793	-1.80364	-1.86793e-07	-1.80364	-0.231393	0.81701	1	-1.86793e-07	-1.80364	-0.231393	0.81701	1	0.306579	0.419228	-1.70567	4	4	0.306579	contigs_merge_contig_10631	0	764	0.419228	-1.70567	0.306579	0.166551	0.232435	-2.58597	2	2	0.166551	contigs_merge_contig_10631	0	764	0.232435	-2.58597	0.166551
contigs_merge_contig_10632	0	0	0	1	#NUM!	0	#NUM!	#NUM!	0	0	0	1	0	1	0	1	1	0	1	0	1	1	0	0	#DIV/0!	0	0	0	contigs_merge_contig_10632	0	332	0	#DIV/0!	0	0	0	#DIV/0!	0	0	0	contigs_merge_contig_10632	0	332	0	#DIV/0!	0
contigs_merge_contig_10633	0.117819	0.117819	0.117819	#DIV/0!	#DIV/0!	0	#DIV/0!	0	0.164426	0.164426	0.164426	#DIV/0!	1.64426e-07	#DIV/0!	0.405495	0.685114	1	1.64426e-07	#DIV/0!	0.405495	0.685114	1	0	0	#DIV/0!	0	0	0	contigs_merge_contig_10633	0	1080	0	#DIV/0!	0	0.117819	0.164426	-3.08535	2	2	0.117819	contigs_merge_contig_10633	0	1080	0.164426	-3.08535	0.117819
contigs_merge_contig_10634	0.564769	0.564769	0.564769	1.30381	0.382737	0.382737	0.382737	1.42789	0.840494	0.840494	0.840494	1.33064	8.40494e-07	1.33064	0.345311	0.72986	1	8.40494e-07	1.33064	0.345311	0.729861	1	1.85894	2.54199	0.894478	7	20	1.85894	contigs_merge_contig_10634	0	630	2.54199	0.894478	1.85894	2.42371	3.38248	1.27722	12	24	2.42371	contigs_merge_contig_10634	0	630	3.38248	1.27722	2.42371
contigs_merge_contig_10635	0.0967438	0.0967438	0.0967438	2.17302	1.1197	1.1197	1.1197	0.688964	0.137335	0.137335	0.137335	2.21774	1.37335e-07	2.21774	0.227978	0.819664	1	1.37335e-07	2.21774	0.227978	0.819664	1	0.082474	0.112778	-3.59992	0	1	0.082474	contigs_merge_contig_10635	0	710	0.112778	-3.59992	0.082474	0.179218	0.250113	-2.48021	0	2	0.179218	contigs_merge_contig_10635	0	710	0.250113	-2.48021	0.179218
contigs_merge_contig_10636	0.658516	0.658516	0.658516	1.62977	0.704665	0.704665	0.704665	11.9415	0.948439	0.948439	0.948439	1.66331	9.48439e-07	1.66331	0.486017	0.626955	1	9.48439e-07	1.66331	0.486017	0.626955	1	1.04565	1.42987	0.0644032	8	26	1.04565	contigs_merge_contig_10636	0	1456	1.42987	0.0644032	1.04565	1.70417	2.37831	0.769068	15	39	1.70417	contigs_merge_contig_10636	0	1456	2.37831	0.769068	1.70417
contigs_merge_contig_10637	0.0150308	0.0150308	-0.0150308	-1.84075	0.880297	0.880297	-0.880297	-0.848373	0.0200506	0.0200506	-0.0200506	-1.80364	-2.00506e-08	-1.80364	-0.0758111	0.939569	1	-2.00506e-08	-1.80364	-0.0758111	0.939569	1	0.0329085	0.0450004	-4.9254	8	8	0.0329085	contigs_merge_contig_10637	0	14235	0.0450004	-4.9254	0.0329085	0.0178777	0.0249498	-5.80569	4	4	0.0178777	contigs_merge_contig_10637	0	14235	0.0249498	-5.80569	0.0178777
contigs_merge_contig_10638	0.425093	0.425093	0.425093	#DIV/0!	#DIV/0!	0	#DIV/0!	0	0.593252	0.593252	0.593252	#DIV/0!	5.93252e-07	#DIV/0!	0.770229	0.441164	1	5.93252e-07	#DIV/0!	0.770229	0.441164	1	0	0	#DIV/0!	0	0	0	contigs_merge_contig_10638	0	449	0	#DIV/0!	0	0.425093	0.593252	-1.23415	3	3	0.425093	contigs_merge_contig_10638	0	449	0.593252	-1.23415	0.425093
contigs_merge_contig_10639	0	0	0	1	#NUM!	0	#NUM!	#NUM!	0	0	0	1	0	1	0	1	1	0	1	0	1	1	0	0	#DIV/0!	0	0	0	contigs_merge_contig_10639	0	498	0	#DIV/0!	0	0	0	#DIV/0!	0	0	0	contigs_merge_contig_10639	0	498	0	#DIV/0!	0
contigs_merge_contig_1064	0.334854	0.334854	0.334854	#DIV/0!	#DIV/0!	0	#DIV/0!	0	0.467316	0.467316	0.467316	#DIV/0!	4.67316e-07	#DIV/0!	0.683605	0.494224	1	4.67316e-07	#DIV/0!	0.683606	0.494224	1	0	0	#DIV/0!	0	0	0	contigs_merge_contig_1064	0	380	0	#DIV/0!	0	0.334854	0.467316	-1.57839	2	2	0.334854	contigs_merge_contig_1064	0	380	0.467316	-1.57839	0.334854
contigs_merge_contig_10640	0	0	0	1	#NUM!	0	#NUM!	#NUM!	0	0	0	1	0	1	0	1	1	0	1	0	1	1	0	0	#DIV/0!	0	0	0	contigs_merge_contig_10640	0	4854	0	#DIV/0!	0	0	0	#DIV/0!	0	0	0	contigs_merge_contig_10640	0	4854	0	#DIV/0!	0
contigs_merge_contig_10641	0.025277	0.025277	0.025277	#DIV/0!	#DIV/0!	0	#DIV/0!	0	0.0352762	0.0352762	0.0352762	#DIV/0!	3.52762e-08	#DIV/0!	0.18782	0.851018	1	3.52762e-08	#DIV/0!	0.18782	0.851018	1	0	0	#DIV/0!	0	0	0	contigs_merge_contig_10641	0	2517	0	#DIV/0!	0	0.025277	0.0352762	-5.30603	0	1	0.025277	contigs_merge_contig_10641	0	2517	0.0352762	-5.30603	0.025277
contigs_merge_contig_10642	0.0588283	0.0588283	0.0588283	1.08651	0.119703	0.119703	0.119703	0.784851	0.101236	0.101236	0.101236	1.10887	1.01236e-07	1.10887	0.0722932	0.942369	1	1.01236e-07	1.10887	0.0722932	0.942369	1	0.680011	0.929875	-0.556369	9	9	0.680011	contigs_merge_contig_10642	0	775	0.929875	-0.556369	0.680011	0.73884	1.03111	-0.436667	9	9	0.73884	contigs_merge_contig_10642	0	775	1.03111	-0.436667	0.73884
contigs_merge_contig_10643	0.0043483	0.0043483	0.0043483	1.08651	0.119703	0.119703	0.119703	0.972255	0.00748286	0.00748286	0.00748286	1.10887	7.48286e-09	1.10887	0.0196546	0.984319	1	7.48286e-09	1.10887	0.0196546	0.984319	1	0.0502631	0.0687318	-4.31436	0	2	0.0502631	contigs_merge_contig_10643	0	2330	0.0687318	-4.31436	0.0502631	0.0546114	0.0762147	-4.19465	0	2	0.0546114	contigs_merge_contig_10643	0	2330	0.0762147	-4.19465	0.0546114
contigs_merge_contig_10644	0.0242184	0.0242184	-0.0242184	-1.10445	0.143332	0.143332	-0.143332	-0.932028	0.0265925	0.0265925	-0.0265925	-1.08218	-2.65925e-08	-1.08218	-0.0323973	0.974155	1	-2.65925e-08	-1.08218	-0.0323973	0.974155	1	0.256078	0.350172	-1.96534	2	6	0.256078	contigs_merge_contig_10644	0	1372	0.350172	-1.96534	0.256078	0.23186	0.323579	-2.10868	5	5	0.23186	contigs_merge_contig_10644	0	1372	0.323579	-2.10868	0.23186
contigs_merge_contig_10645	0.4501	0.4501	0.4501	1.21119	0.276428	0.276428	0.276428	1.25321	0.688127	0.688127	0.688127	1.23612	6.88127e-07	1.23612	0.269558	0.7875	1	6.88127e-07	1.23612	0.269558	0.7875	1	2.13123	2.91434	1.09169	115	122	2.13123	contigs_merge_contig_10645	0	3352	2.91434	1.09169	2.13123	2.58133	3.60246	1.36812	125	136	2.58133	contigs_merge_contig_10645	0	3352	3.60246	1.36812	2.58133
contigs_merge_contig_10646	0.023783	0.023783	0.023783	1.08651	0.119703	0.119703	0.119703	0.935746	0.0409274	0.0409274	0.0409274	1.10887	4.09274e-08	1.10887	0.0459661	0.963337	1	4.09274e-08	1.10887	0.0459661	0.963337	1	0.274913	0.375928	-1.86295	3	4	0.274913	contigs_merge_contig_10646	0	852	0.375928	-1.86295	0.274913	0.298696	0.416855	-1.74325	4	4	0.298696	contigs_merge_contig_10646	0	852	0.416855	-1.74325	0.298696
contigs_merge_contig_10647	0.160081	0.160081	0.160081	#DIV/0!	#DIV/0!	0	#DIV/0!	0	0.223406	0.223406	0.223406	#DIV/0!	2.23406e-07	#DIV/0!	0.472659	0.636457	1	2.23406e-07	#DIV/0!	0.472659	0.636457	1	0	0	#DIV/0!	0	0	0	contigs_merge_contig_10647	0	6359	0	#DIV/0!	0	0.160081	0.223406	-2.64312	5	16	0.160081	contigs_merge_contig_10647	0	6359	0.223406	-2.64312	0.160081
contigs_merge_contig_10648	0.0691215	0.0691215	0.0691215	2.29375	1.19771	1.19771	1.19771	0.716605	0.0979683	0.0979683	0.0979683	2.34095	9.79683e-08	2.34095	0.198296	0.842814	1	9.79683e-08	2.34095	0.198296	0.842814	1	0.0534275	0.0730589	-4.22627	9	9	0.0534275	contigs_merge_contig_10648	0	9864	0.0730589	-4.22627	0.0534275	0.122549	0.171027	-3.02857	18	19	0.122549	contigs_merge_contig_10648	0	9864	0.171027	-3.02857	0.122549
contigs_merge_contig_10649	0.708191	0.708191	-0.708191	-1.93279	0.950687	0.950687	-0.950687	1.39216	0.947044	0.947044	-0.947044	-1.89382	-9.47044e-07	-1.89382	-0.540847	0.588613	1	-9.47044e-07	-1.89382	-0.540847	0.588613	1	1.46741	2.00659	0.553269	21	21	1.46741	contigs_merge_contig_10649	0	838	2.00659	0.553269	1.46741	0.759216	1.05955	-0.397418	10	10	0.759216	contigs_merge_contig_10649	0	838	1.05955	-0.397418	0.759216
contigs_merge_contig_1065	0.219982	0.219982	-0.219982	-1.14254	0.192241	0.192241	-0.192241	-1.30707	0.257381	0.257381	-0.257381	-1.1195	-2.57381e-07	-1.1195	-0.120463	0.904116	1	-2.57381e-07	-1.1195	-0.120463	0.904116	1	1.76331	2.41122	0.818285	22	72	1.76331	contigs_merge_contig_1065	0	2391	2.41122	0.818285	1.76331	1.54333	2.15384	0.626043	13	58	1.54333	contigs_merge_contig_1065	0	2391	2.15384	0.626043	1.54333
contigs_merge_contig_10650	0.0551878	0.0551878	0.0551878	1.35814	0.441631	0.441631	0.441631	0.836318	0.0813554	0.0813554	0.0813554	1.38609	8.13554e-08	1.38609	0.114734	0.908656	1	8.13554e-08	1.38609	0.114734	0.908656	1	0.154096	0.210717	-2.6981	4	4	0.154096	contigs_merge_contig_10650	0	1520	0.210717	-2.6981	0.154096	0.209284	0.292073	-2.25647	5	5	0.209284	contigs_merge_contig_10650	0	1520	0.292073	-2.25647	0.209284
contigs_merge_contig_10651	0	0	0	1	#NUM!	0	#NUM!	#NUM!	0	0	0	1	0	1	0	1	1	0	1	0	1	1	0	0	#DIV/0!	0	0	0	contigs_merge_contig_10651	0	228	0	#DIV/0!	0	0	0	#DIV/0!	0	0	0	contigs_merge_contig_10651	0	228	0	#DIV/0!	0
contigs_merge_contig_10652	1.6958	1.6958	1.6958	1.8767	0.908198	0.908198	0.908198	1.95418	2.42106	2.42106	2.42106	1.91532	2.42106e-06	1.91532	0.871861	0.383284	1	2.42106e-06	1.91532	0.871862	0.383284	1	1.9343	2.64504	0.951811	11	11	1.9343	contigs_merge_contig_10652	0	333	2.64504	0.951811	1.9343	3.6301	5.0661	1.86001	19	19	3.6301	contigs_merge_contig_10652	0	333	5.0661	1.86001	3.6301
contigs_merge_contig_10653	2.86386	2.86386	2.86386	3.25953	1.70467	1.70467	1.70467	5.98532	4.03242	4.03242	4.03242	3.32661	4.03242e-06	3.32661	1.47256	0.140871	1	4.03242e-06	3.32661	1.47256	0.140871	1	1.26746	1.73317	0.341937	5	5	1.26746	contigs_merge_contig_10653	0	231	1.73317	0.341937	1.26746	4.13132	5.76559	2.0466	15	15	4.13132	contigs_merge_contig_10653	0	231	5.76559	2.0466	4.13132
contigs_merge_contig_10654	2.00637	2.00637	2.00637	2.25063	1.17033	1.17033	1.17033	2.71619	2.8452	2.8452	2.8452	2.29695	2.8452e-06	2.29695	1.05794	0.290082	1	2.8452e-06	2.29695	1.05794	0.290082	1	1.60429	2.19377	0.681934	28	28	1.60429	contigs_merge_contig_10654	0	1022	2.19377	0.681934	1.60429	3.61066	5.03897	1.85226	58	58	3.61066	contigs_merge_contig_10654	0	1022	5.03897	1.85226	3.61066
contigs_merge_contig_10655	0.444292	0.444292	0.444292	4.34604	2.1197	2.1197	2.1197	0.272299	0.623782	0.623782	0.623782	4.43548	6.23782e-07	4.43548	0.627901	0.530069	1	6.23782e-07	4.43548	0.627901	0.530069	1	0.132781	0.18157	-2.91288	1	1	0.132781	contigs_merge_contig_10655	0	441	0.18157	-2.91288	0.132781	0.577073	0.805352	-0.793174	1	4	0.577073	contigs_merge_contig_10655	0	441	0.805352	-0.793174	0.577073
contigs_merge_contig_10656	0.181596	0.181596	0.181596	1.62977	0.704665	0.704665	0.704665	0.607229	0.261546	0.261546	0.261546	1.66331	2.61546e-07	1.66331	0.255224	0.79855	1	2.61546e-07	1.66331	0.255224	0.79855	1	0.288354	0.394307	-1.79409	14	14	0.288354	contigs_merge_contig_10656	0	2843	0.394307	-1.79409	0.288354	0.46995	0.655854	-1.08942	19	21	0.46995	contigs_merge_contig_10656	0	2843	0.655854	-1.08942	0.46995
contigs_merge_contig_10657	0	0	0	1	#NUM!	0	#NUM!	#NUM!	0	0	0	1	0	1	0	1	1	0	1	0	1	1	0	0	#DIV/0!	0	0	0	contigs_merge_contig_10657	0	439	0	#DIV/0!	0	0	0	#DIV/0!	0	0	0	contigs_merge_contig_10657	0	439	0	#DIV/0!	0
contigs_merge_contig_10658	1.38952	1.38952	1.38952	4.94966	2.30733	2.30733	2.30733	-0.530934	1.94909	1.94909	1.94909	5.05152	1.94909e-06	5.05152	1.14233	0.253315	1	1.94909e-06	5.05152	1.14234	0.253315	1	0.351808	0.481077	-1.50714	9	9	0.351808	contigs_merge_contig_10658	0	1498	0.481077	-1.50714	0.351808	1.74133	2.43017	0.800191	34	41	1.74133	contigs_merge_contig_10658	0	1498	2.43017	0.800191	1.74133
contigs_merge_contig_10659	0.998407	0.998407	0.998407	2.85209	1.51202	1.51202	1.51202	-0.696127	1.40853	1.40853	1.40853	2.91078	1.40853e-06	2.91078	0.829578	0.406778	1	1.40853e-06	2.91078	0.829578	0.406778	1	0.53907	0.737147	-0.891454	16	16	0.53907	contigs_merge_contig_10659	0	1738	0.737147	-0.891454	0.53907	1.53748	2.14568	0.620566	42	42	1.53748	contigs_merge_contig_10659	0	1738	2.14568	0.620566	1.53748
contigs_merge_contig_1066	1.89371	1.89371	1.89371	3.80279	1.92706	1.92706	1.92706	-2.40682	2.66184	2.66184	2.66184	3.88105	2.66184e-06	3.88105	1.25346	0.210039	1	2.66184e-06	3.88105	1.25346	0.210039	1	0.675652	0.923914	-0.565647	6	6	0.675652	contigs_merge_contig_1066	0	520	0.923914	-0.565647	0.675652	2.56936	3.58575	1.36141	21	21	2.56936	contigs_merge_contig_1066	0	520	3.58575	1.36141	2.56936
contigs_merge_contig_10660	3.15779	3.15779	3.15779	3.07845	1.6222	1.6222	1.6222	3.68839	4.44971	4.44971	4.44971	3.1418	4.44971e-06	3.1418	1.51692	0.129288	1	4.44971e-06	3.1418	1.51692	0.129288	1	1.5193	2.07756	0.603411	24	24	1.5193	contigs_merge_contig_10660	0	925	2.07756	0.603411	1.5193	4.6771	6.52727	2.22561	68	68	4.6771	contigs_merge_contig_10660	0	925	6.52727	2.22561	4.6771
contigs_merge_contig_10661	0.0659982	0.0659982	0.0659982	#DIV/0!	#DIV/0!	0	#DIV/0!	0	0.0921059	0.0921059	0.0921059	#DIV/0!	9.21059e-08	#DIV/0!	0.30349	0.761517	1	9.21059e-08	#DIV/0!	0.30349	0.761517	1	0	0	#DIV/0!	0	0	0	contigs_merge_contig_10661	0	964	0	#DIV/0!	0	0.0659982	0.0921059	-3.92143	1	1	0.0659982	contigs_merge_contig_10661	0	964	0.0921059	-3.92143	0.0659982
contigs_merge_contig_10662	0.146258	0.146258	0.146258	#DIV/0!	#DIV/0!	0	#DIV/0!	0	0.204115	0.204115	0.204115	#DIV/0!	2.04115e-07	#DIV/0!	0.451791	0.651419	1	2.04115e-07	#DIV/0!	0.451791	0.65142	1	0	0	#DIV/0!	0	0	0	contigs_merge_contig_10662	0	870	0	#DIV/0!	0	0.146258	0.204115	-2.77341	0	2	0.146258	contigs_merge_contig_10662	0	870	0.204115	-2.77341	0.146258
contigs_merge_contig_10663	0.595714	0.595714	0.595714	1.47551	0.561212	0.561212	0.561212	2.72601	0.866623	0.866623	0.866623	1.50587	8.66623e-07	1.50587	0.41827	0.67575	1	8.66623e-07	1.50587	0.41827	0.67575	1	1.25279	1.71312	0.325149	81	81	1.25279	contigs_merge_contig_10663	0	3786	1.71312	0.325149	1.25279	1.84851	2.57974	0.886362	110	110	1.84851	contigs_merge_contig_10663	0	3786	2.57974	0.886362	1.84851
contigs_merge_contig_10664	0.050057	0.050057	0.050057	1.08651	0.119703	0.119703	0.119703	0.848345	0.0861417	0.0861417	0.0861417	1.10887	8.61417e-08	1.10887	0.0666863	0.946831	1	8.61417e-08	1.10887	0.0666863	0.946831	1	0.578622	0.791231	-0.789307	5	5	0.578622	contigs_merge_contig_10664	0	506	0.791231	-0.789307	0.578622	0.628679	0.877373	-0.669605	5	5	0.628679	contigs_merge_contig_10664	0	506	0.877373	-0.669605	0.628679
contigs_merge_contig_10665	0.2777	0.2777	-0.2777	-1.53396	0.617263	0.617263	-0.617263	-0.345574	0.365102	0.365102	-0.365102	-1.50303	-3.65102e-07	-1.50303	-0.270877	0.786486	1	-3.65102e-07	-1.50303	-0.270877	0.786486	1	0.797773	1.09091	-0.32595	5	5	0.797773	contigs_merge_contig_10665	0	367	1.09091	-0.32595	0.797773	0.520073	0.725805	-0.943213	3	3	0.520073	contigs_merge_contig_10665	0	367	0.725805	-0.943213	0.520073
contigs_merge_contig_10666	0.120682	0.120682	0.120682	5.07038	2.34209	2.34209	2.34209	0.538583	0.169256	0.169256	0.169256	5.17473	1.69256e-07	5.17473	0.338281	0.735151	1	1.69256e-07	5.17473	0.338281	0.735151	1	0.0296489	0.0405431	-5.07588	0	3	0.0296489	contigs_merge_contig_10666	0	5925	0.0405431	-5.07588	0.0296489	0.150331	0.209799	-2.73378	0	14	0.150331	contigs_merge_contig_10666	0	5925	0.209799	-2.73378	0.150331
contigs_merge_contig_10667	0	0	0	1	#NUM!	0	#NUM!	#NUM!	0	0	0	1	0	1	0	1	1	0	1	0	1	1	0	0	#DIV/0!	0	0	0	contigs_merge_contig_10667	0	475	0	#DIV/0!	0	0	0	#DIV/0!	0	0	0	contigs_merge_contig_10667	0	475	0	#DIV/0!	0
contigs_merge_contig_10668	1.71836	1.71836	1.71836	1.69166	0.758436	0.758436	0.758436	1.57768	2.46802	2.46802	2.46802	1.72647	2.46802e-06	1.72647	0.81093	0.417406	1	2.46802e-06	1.72647	0.81093	0.417406	1	2.48441	3.39728	1.3129	33	79	2.48441	contigs_merge_contig_10668	0	1862	3.39728	1.3129	2.48441	4.20276	5.8653	2.07134	70	123	4.20276	contigs_merge_contig_10668	0	1862	5.8653	2.07134	4.20276
contigs_merge_contig_10669	0.0439303	0.0439303	-0.0439303	-1.22717	0.295335	0.295335	-0.295335	-0.875411	0.0546302	0.0546302	-0.0546302	-1.20242	-5.46302e-08	-1.20242	-0.0708594	0.94351	1	-5.46302e-08	-1.20242	-0.0708594	0.94351	1	0.237311	0.324509	-2.07515	4	4	0.237311	contigs_merge_contig_10669	0	987	0.324509	-2.07515	0.237311	0.193381	0.269879	-2.37048	3	3	0.193381	contigs_merge_contig_10669	0	987	0.269879	-2.37048	0.193381
contigs_merge_contig_1067	0.665871	0.665871	0.665871	1.3452	0.427825	0.427825	0.427825	1.45139	0.983559	0.983559	0.983559	1.37289	9.83559e-07	1.37289	0.393143	0.694214	1	9.83559e-07	1.37289	0.393143	0.694214	1	1.92892	2.63768	0.947794	82	84	1.92892	contigs_merge_contig_1067	0	2550	2.63768	0.947794	1.92892	2.59479	3.62124	1.37562	103	104	2.59479	contigs_merge_contig_1067	0	2550	3.62124	1.37562	2.59479
contigs_merge_contig_10670	0.16885	0.16885	0.16885	1.76558	0.820142	0.820142	0.820142	0.623928	0.241851	0.241851	0.241851	1.80191	2.41851e-07	1.80191	0.263094	0.792478	1	2.41851e-07	1.80191	0.263094	0.792478	1	0.220552	0.301592	-2.18081	15	16	0.220552	contigs_merge_contig_10670	0	4248	0.301592	-2.18081	0.220552	0.389402	0.543442	-1.36067	26	26	0.389402	contigs_merge_contig_10670	0	4248	0.543442	-1.36067	0.389402
contigs_merge_contig_10671	0.108942	0.108942	-0.108942	#DIV/0!	#DIV/0!	0	#DIV/0!	0	0.148972	0.148972	-0.148972	#DIV/0!	-1.48972e-07	#DIV/0!	-0.385969	0.699519	1	-1.48972e-07	#DIV/0!	-0.385969	0.69952	1	0.108942	0.148972	-3.19836	0	2	0.108942	contigs_merge_contig_10671	0	1075	0.148972	-3.19836	0.108942	0	0	#DIV/0!	0	0	0	contigs_merge_contig_10671	0	1075	0	#DIV/0!	0
contigs_merge_contig_10672	0.044367	0.044367	0.044367	#DIV/0!	#DIV/0!	0	#DIV/0!	0	0.0619178	0.0619178	0.0619178	#DIV/0!	6.19178e-08	#DIV/0!	0.248833	0.80349	1	6.19178e-08	#DIV/0!	0.248833	0.80349	1	0	0	#DIV/0!	0	0	0	contigs_merge_contig_10672	0	1434	0	#DIV/0!	0	0.044367	0.0619178	-4.49437	0	1	0.044367	contigs_merge_contig_10672	0	1434	0.0619178	-4.49437	0.044367
contigs_merge_contig_10673	0.119492	0.119492	-0.119492	-2.14755	1.10269	1.10269	-1.10269	-0.662121	0.160468	0.160468	-0.160468	-2.10424	-1.60468e-07	-2.10424	-0.238918	0.811169	1	-1.60468e-07	-2.10424	-0.238918	0.811169	1	0.22362	0.305787	-2.16088	6	7	0.22362	contigs_merge_contig_10673	0	1833	0.305787	-2.16088	0.22362	0.104128	0.145319	-3.26357	3	3	0.104128	contigs_merge_contig_10673	0	1833	0.145319	-3.26357	0.104128
contigs_merge_contig_10674	1.24343	1.24343	1.24343	#DIV/0!	#DIV/0!	0	#DIV/0!	0	1.73531	1.73531	1.73531	#DIV/0!	1.73531e-06	#DIV/0!	1.31731	0.187734	1	1.73531e-06	#DIV/0!	1.31731	0.187734	1	0	0	#DIV/0!	0	0	0	contigs_merge_contig_10674	0	307	0	#DIV/0!	0	1.24343	1.73531	0.314328	6	6	1.24343	contigs_merge_contig_10674	0	307	1.73531	0.314328	1.24343
contigs_merge_contig_10675	0.442728	0.442728	0.442728	2.71628	1.44163	1.44163	1.44163	0.262514	0.625122	0.625122	0.625122	2.77218	6.25122e-07	2.77218	0.541926	0.587869	1	6.25122e-07	2.77218	0.541926	0.58787	1	0.257958	0.352743	-1.95479	4	4	0.257958	contigs_merge_contig_10675	0	908	0.352743	-1.95479	0.257958	0.700686	0.977865	-0.51316	10	10	0.700686	contigs_merge_contig_10675	0	908	0.977865	-0.51316	0.700686
contigs_merge_contig_10676	0	0	0	1	#NUM!	0	#NUM!	#NUM!	0	0	0	1	0	1	0	1	1	0	1	0	1	1	0	0	#DIV/0!	0	0	0	contigs_merge_contig_10676	0	1291	0	#DIV/0!	0	0	0	#DIV/0!	0	0	0	contigs_merge_contig_10676	0	1291	0	#DIV/0!	0
contigs_merge_contig_10677	0.00631475	0.00631475	0.00631475	1.01408	0.0201668	0.0201668	0.0201668	0.982562	0.0214366	0.0214366	0.0214366	1.03495	2.14366e-08	1.03495	0.0191867	0.984692	1	2.14366e-08	1.03495	0.0191867	0.984692	1	0.448594	0.613426	-1.15652	13	15	0.448594	contigs_merge_contig_10677	0	1958	0.613426	-1.15652	0.448594	0.454909	0.634863	-1.13635	14	14	0.454909	contigs_merge_contig_10677	0	1958	0.634863	-1.13635	0.454909
contigs_merge_contig_10678	0.883685	0.883685	0.883685	1.99683	0.997712	0.997712	0.997712	-4.74001	1.2582	1.2582	1.2582	2.03792	1.2582e-06	2.03792	0.655646	0.512052	1	1.2582e-06	2.03792	0.655646	0.512052	1	0.886494	1.21223	-0.173817	111	111	0.886494	contigs_merge_contig_10678	0	7332	1.21223	-0.173817	0.886494	1.77018	2.47043	0.823895	204	204	1.77018	contigs_merge_contig_10678	0	7332	2.47043	0.823895	1.77018
contigs_merge_contig_10679	0.524513	0.524513	0.524513	1.55216	0.634276	0.634276	0.634276	-7.5593	0.758733	0.758733	0.758733	1.5841	7.58733e-07	1.5841	0.414127	0.678781	1	7.58733e-07	1.5841	0.414127	0.678781	1	0.949932	1.29898	-0.0741037	14	14	0.949932	contigs_merge_contig_10679	0	863	1.29898	-0.0741037	0.949932	1.47444	2.05771	0.560172	20	20	1.47444	contigs_merge_contig_10679	0	863	2.05771	0.560172	1.47444
contigs_merge_contig_1068	0	0	0	1	#NUM!	0	#NUM!	#NUM!	0	0	0	1	0	1	0	1	1	0	1	0	1	1	0	0	#DIV/0!	0	0	0	contigs_merge_contig_1068	0	1250	0	#DIV/0!	0	0	0	#DIV/0!	0	0	0	contigs_merge_contig_1068	0	1250	0	#DIV/0!	0
contigs_merge_contig_10680	0.870604	0.870604	0.870604	2.44465	1.28963	1.28963	1.28963	-0.765086	1.23196	1.23196	1.23196	2.49496	1.23196e-06	2.49496	0.725925	0.467885	1	1.23196e-06	2.49496	0.725925	0.467885	1	0.60264	0.824074	-0.730631	12	12	0.60264	contigs_merge_contig_10680	0	1166	0.824074	-0.730631	0.60264	1.47324	2.05603	0.558996	27	27	1.47324	contigs_merge_contig_10680	0	1166	2.05603	0.558996	1.47324
contigs_merge_contig_10681	0	0	0	1	#NUM!	0	#NUM!	#NUM!	0	0	0	1	0	1	0	1	1	0	1	0	1	1	0	0	#DIV/0!	0	0	0	contigs_merge_contig_10681	0	439	0	#DIV/0!	0	0	0	#DIV/0!	0	0	0	contigs_merge_contig_10681	0	439	0	#DIV/0!	0
contigs_merge_contig_10682	0.446693	0.446693	0.446693	3.25953	1.70467	1.70467	1.70467	0.271096	0.628959	0.628959	0.628959	3.32661	6.28959e-07	3.32661	0.581567	0.560859	1	6.28959e-07	3.32661	0.581567	0.560859	1	0.197693	0.270333	-2.33867	5	5	0.197693	contigs_merge_contig_10682	0	1481	0.270333	-2.33867	0.197693	0.644385	0.899292	-0.634005	15	15	0.644385	contigs_merge_contig_10682	0	1481	0.899292	-0.634005	0.644385
contigs_merge_contig_10683	0.134304	0.134304	-0.134304	#DIV/0!	#DIV/0!	0	#DIV/0!	0	0.183653	0.183653	-0.183653	#DIV/0!	-1.83653e-07	#DIV/0!	-0.428547	0.668253	1	-1.83653e-07	#DIV/0!	-0.428547	0.668253	1	0.134304	0.183653	-2.89643	2	3	0.134304	contigs_merge_contig_10683	0	1308	0.183653	-2.89643	0.134304	0	0	#DIV/0!	0	0	0	contigs_merge_contig_10683	0	1308	0	#DIV/0!	0
contigs_merge_contig_10684	8.28459	8.28459	8.28459	1.68777	0.755114	0.755114	0.755114	1.21031	11.9008	11.9008	11.9008	1.7225	1.19008e-05	1.7225	1.77716	0.0755413	1	1.19008e-05	1.7225	1.77717	0.0755412	1	12.0457	16.4717	3.59044	1124	1124	12.0457	contigs_merge_contig_10684	0	5464	16.4717	3.59044	12.0457	20.3303	28.3725	4.34556	1744	1746	20.3303	contigs_merge_contig_10684	0	5464	28.3725	4.34556	20.3303
contigs_merge_contig_10685	0	0	0	1	#NUM!	0	#NUM!	#NUM!	0	0	0	1	0	1	0	1	1	0	1	0	1	1	0	0	#DIV/0!	0	0	0	contigs_merge_contig_10685	0	1424	0	#DIV/0!	0	0	0	#DIV/0!	0	0	0	contigs_merge_contig_10685	0	1424	0	#DIV/0!	0
contigs_merge_contig_10686	0	0	0	1	#NUM!	0	#NUM!	#NUM!	0	0	0	1	0	1	0	1	1	0	1	0	1	1	0	0	#DIV/0!	0	0	0	contigs_merge_contig_10686	0	336	0	#DIV/0!	0	0	0	#DIV/0!	0	0	0	contigs_merge_contig_10686	0	336	0	#DIV/0!	0
contigs_merge_contig_10687	0.022974	0.022974	0.022974	1.08651	0.119703	0.119703	0.119703	0.937423	0.0395353	0.0395353	0.0395353	1.10887	3.95353e-08	1.10887	0.0451776	0.963966	1	3.95353e-08	1.10887	0.0451776	0.963966	1	0.265562	0.363141	-1.91288	2	2	0.265562	contigs_merge_contig_10687	0	441	0.363141	-1.91288	0.265562	0.288537	0.402676	-1.79317	2	2	0.288537	contigs_merge_contig_10687	0	441	0.402676	-1.79317	0.288537
contigs_merge_contig_10688	0	0	0	1	#NUM!	0	#NUM!	#NUM!	0	0	0	1	0	1	0	1	1	0	1	0	1	1	0	0	#DIV/0!	0	0	0	contigs_merge_contig_10688	0	459	0	#DIV/0!	0	0	0	#DIV/0!	0	0	0	contigs_merge_contig_10688	0	459	0	#DIV/0!	0
contigs_merge_contig_10689	0	0	0	1	#NUM!	0	#NUM!	#NUM!	0	0	0	1	0	1	0	1	1	0	1	0	1	1	0	0	#DIV/0!	0	0	0	contigs_merge_contig_10689	0	286	0	#DIV/0!	0	0	0	#DIV/0!	0	0	0	contigs_merge_contig_10689	0	286	0	#DIV/0!	0
contigs_merge_contig_1069	0.20875	0.20875	0.20875	#DIV/0!	#DIV/0!	0	#DIV/0!	0	0.291327	0.291327	0.291327	#DIV/0!	2.91327e-07	#DIV/0!	0.539748	0.589371	1	2.91327e-07	#DIV/0!	0.539748	0.589371	1	0	0	#DIV/0!	0	0	0	contigs_merge_contig_1069	0	2743	0	#DIV/0!	0	0.20875	0.291327	-2.26015	9	9	0.20875	contigs_merge_contig_1069	0	2743	0.291327	-2.26015	0.20875
contigs_merge_contig_10690	0.333082	0.333082	-0.333082	-4.60189	2.20223	2.20223	-2.20223	-0.35885	0.452867	0.452867	-0.452867	-4.50909	-4.52867e-07	-4.50909	-0.537085	0.591209	1	-4.52867e-07	-4.50909	-0.537085	0.591209	1	0.425556	0.581923	-1.23258	4	5	0.425556	contigs_merge_contig_10690	0	688	0.581923	-1.23258	0.425556	0.0924743	0.129055	-3.4348	1	1	0.0924743	contigs_merge_contig_10690	0	688	0.129055	-3.4348	0.0924743
contigs_merge_contig_10691	0	0	0	1	#NUM!	0	#NUM!	#NUM!	0	0	0	1	0	1	0	1	1	0	1	0	1	1	0	0	#DIV/0!	0	0	0	contigs_merge_contig_10691	0	709	0	#DIV/0!	0	0	0	#DIV/0!	0	0	0	contigs_merge_contig_10691	0	709	0	#DIV/0!	0
contigs_merge_contig_10692	0.4453	0.4453	0.4453	#DIV/0!	#DIV/0!	0	#DIV/0!	0	0.621453	0.621453	0.621453	#DIV/0!	6.21453e-07	#DIV/0!	0.788323	0.430508	1	6.21453e-07	#DIV/0!	0.788323	0.430508	1	0	0	#DIV/0!	0	0	0	contigs_merge_contig_10692	0	1143	0	#DIV/0!	0	0.4453	0.621453	-1.16715	8	8	0.4453	contigs_merge_contig_10692	0	1143	0.621453	-1.16715	0.4453
contigs_merge_contig_10693	7.10812	7.10812	7.10812	1.29776	0.376028	0.376028	0.376028	1.08215	10.5917	10.5917	10.5917	1.32447	1.05917e-05	1.32447	1.21596	0.224002	1	1.05917e-05	1.32447	1.21596	0.224002	1	23.8717	32.6431	4.57723	2370	2371	23.8717	contigs_merge_contig_10693	0	5816	32.6431	4.57723	23.8717	30.9798	43.2348	4.95325	2832	2832	30.9798	contigs_merge_contig_10693	0	5816	43.2348	4.95325	30.9798
contigs_merge_contig_10694	0	0	0	1	#NUM!	0	#NUM!	#NUM!	0	0	0	1	0	1	0	1	1	0	1	0	1	1	0	0	#DIV/0!	0	0	0	contigs_merge_contig_10694	0	480	0	#DIV/0!	0	0	0	#DIV/0!	0	0	0	contigs_merge_contig_10694	0	480	0	#DIV/0!	0
contigs_merge_contig_10695	0	0	0	1	#NUM!	0	#NUM!	#NUM!	0	0	0	1	0	1	0	1	1	0	1	0	1	1	0	0	#DIV/0!	0	0	0	contigs_merge_contig_10695	0	598	0	#DIV/0!	0	0	0	#DIV/0!	0	0	0	contigs_merge_contig_10695	0	598	0	#DIV/0!	0
contigs_merge_contig_10696	0.152724	0.152724	0.152724	5.43255	2.44163	2.44163	2.44163	0.497518	0.214109	0.214109	0.214109	5.54435	2.14109e-07	5.54435	0.385585	0.699804	1	2.14109e-07	5.54435	0.385585	0.699804	1	0.0344552	0.0471154	-4.85914	2	2	0.0344552	contigs_merge_contig_10696	0	3399	0.0471154	-4.85914	0.0344552	0.187179	0.261224	-2.41751	10	10	0.187179	contigs_merge_contig_10696	0	3399	0.261224	-2.41751	0.187179
contigs_merge_contig_10697	0.0778459	0.0778459	0.0778459	#DIV/0!	#DIV/0!	0	#DIV/0!	0	0.10864	0.10864	0.10864	#DIV/0!	1.0864e-07	#DIV/0!	0.329606	0.741698	1	1.0864e-07	#DIV/0!	0.329606	0.741698	1	0	0	#DIV/0!	0	0	0	contigs_merge_contig_10697	0	5721	0	#DIV/0!	0	0.0778459	0.10864	-3.68324	3	7	0.0778459	contigs_merge_contig_10697	0	5721	0.10864	-3.68324	0.0778459
contigs_merge_contig_10698	0.0596832	0.0596832	0.0596832	#DIV/0!	#DIV/0!	0	#DIV/0!	0	0.0832928	0.0832928	0.0832928	#DIV/0!	8.32928e-08	#DIV/0!	0.288605	0.772884	1	8.32928e-08	#DIV/0!	0.288605	0.772884	1	0	0	#DIV/0!	0	0	0	contigs_merge_contig_10698	0	1066	0	#DIV/0!	0	0.0596832	0.0832928	-4.06653	1	1	0.0596832	contigs_merge_contig_10698	0	1066	0.0832928	-4.06653	0.0596832
contigs_merge_contig_10699	2.97135	2.97135	2.97135	1.34321	0.425689	0.425689	0.425689	1.1367	4.39039	4.39039	4.39039	1.37086	4.39039e-06	1.37086	0.828714	0.407266	1	4.39039e-06	1.37086	0.828714	0.407266	1	8.65742	11.8385	3.11394	164	182	8.65742	contigs_merge_contig_10699	0	1231	11.8385	3.11394	8.65742	11.6288	16.2289	3.53963	214	225	11.6288	contigs_merge_contig_10699	0	1231	16.2289	3.53963	11.6288
contigs_merge_contig_107	0	0	0	1	#NUM!	0	#NUM!	#NUM!	0	0	0	1	0	1	0	1	1	0	1	0	1	1	0	0	#DIV/0!	0	0	0	contigs_merge_contig_107	0	242	0	#DIV/0!	0	0	0	#DIV/0!	0	0	0	contigs_merge_contig_107	0	242	0	#DIV/0!	0
contigs_merge_contig_1070	0.405761	0.405761	-0.405761	-1.61066	0.687652	0.687652	-0.687652	0.166027	0.536156	0.536156	-0.536156	-1.57818	-5.36156e-07	-1.57818	-0.346754	0.728776	1	-5.36156e-07	-1.57818	-0.346754	0.728776	1	1.07022	1.46347	0.0979125	7	7	1.07022	contigs_merge_contig_1070	0	383	1.46347	0.0979125	1.07022	0.664463	0.927312	-0.58974	4	4	0.664463	contigs_merge_contig_1070	0	383	0.927312	-0.58974	0.664463
contigs_merge_contig_10700	0.291697	0.291697	0.291697	#DIV/0!	#DIV/0!	0	#DIV/0!	0	0.407087	0.407087	0.407087	#DIV/0!	4.07087e-07	#DIV/0!	0.638033	0.523452	1	4.07087e-07	#DIV/0!	0.638033	0.523452	1	0	0	#DIV/0!	0	0	0	contigs_merge_contig_10700	0	1963	0	#DIV/0!	0	0.291697	0.407087	-1.77746	9	9	0.291697	contigs_merge_contig_10700	0	1963	0.407087	-1.77746	0.291697
contigs_merge_contig_10701	0.394859	0.394859	-0.394859	-1.55314	0.635185	0.635185	-0.635185	0.306165	0.519858	0.519858	-0.519858	-1.52182	-5.19858e-07	-1.52182	-0.327979	0.742928	1	-5.19858e-07	-1.52182	-0.327979	0.742928	1	1.10871	1.5161	0.148887	27	27	1.10871	contigs_merge_contig_10701	0	1426	1.5161	0.148887	1.10871	0.713855	0.996242	-0.486298	16	16	0.713855	contigs_merge_contig_10701	0	1426	0.996242	-0.486298	0.713855
contigs_merge_contig_10702	0.184878	0.184878	0.184878	1.06434	0.0899552	0.0899552	0.0899552	1.05907	0.338877	0.338877	0.338877	1.08624	3.38877e-07	1.08624	0.118357	0.905784	1	3.38877e-07	1.08624	0.118357	0.905784	1	2.87358	3.92945	1.52285	98	98	2.87358	contigs_merge_contig_10702	0	1997	3.92945	1.52285	2.87358	3.05846	4.26833	1.6128	96	96	3.05846	contigs_merge_contig_10702	0	1997	4.26833	1.6128	3.05846
contigs_merge_contig_10703	0.521178	0.521178	0.521178	2.44465	1.28963	1.28963	1.28963	0.123223	0.737498	0.737498	0.737498	2.49496	7.37498e-07	2.49496	0.561661	0.574347	1	7.37498e-07	2.49496	0.561661	0.574347	1	0.360764	0.493323	-1.47087	14	16	0.360764	contigs_merge_contig_10703	0	2597	0.493323	-1.47087	0.360764	0.881942	1.23082	-0.181245	32	36	0.881942	contigs_merge_contig_10703	0	2597	1.23082	-0.181245	0.881942
contigs_merge_contig_10704	4.39631	4.39631	4.39631	2.25252	1.17154	1.17154	1.17154	1.64674	6.23419	6.23419	6.23419	2.29888	6.23419e-06	2.29888	1.56672	0.117179	1	6.23419e-06	2.29888	1.56673	0.117179	1	3.50997	4.79967	1.81146	37	41	3.50997	contigs_merge_contig_10704	0	684	4.79967	1.81146	3.50997	7.90628	11.0339	2.983	74	85	7.90628	contigs_merge_contig_10704	0	684	11.0339	2.983	7.90628
contigs_merge_contig_10705	2.74278	2.74278	-2.74278	-1.18626	0.246425	0.246425	-0.246425	-1.06351	3.33621	3.33621	-3.33621	-1.16234	-3.33621e-06	-1.16234	-0.50048	0.616737	1	-3.33621e-06	-1.16234	-0.50048	0.616737	1	17.468	23.8865	4.12664	2419	2436	17.468	contigs_merge_contig_10705	0	8166	23.8865	4.12664	17.468	14.7252	20.5502	3.88022	1871	1890	14.7252	contigs_merge_contig_10705	0	8166	20.5502	3.88022	14.7252
contigs_merge_contig_10706	0.300896	0.300896	-0.300896	-1.39897	0.484369	0.484369	-0.484369	0.190018	0.390235	0.390235	-0.390235	-1.37076	-3.90235e-07	-1.37076	-0.24704	0.804877	1	-3.90235e-07	-1.37076	-0.24704	0.804877	1	1.05507	1.44275	0.0773423	37	38	1.05507	contigs_merge_contig_10706	0	2109	1.44275	0.0773423	1.05507	0.754176	1.05251	-0.407027	25	25	0.754176	contigs_merge_contig_10706	0	2109	1.05251	-0.407027	0.754176
contigs_merge_contig_10707	0	0	0	1	#NUM!	0	#NUM!	#NUM!	0	0	0	1	0	1	0	1	1	0	1	0	1	1	0	0	#DIV/0!	0	0	0	contigs_merge_contig_10707	0	2461	0	#DIV/0!	0	0	0	#DIV/0!	0	0	0	contigs_merge_contig_10707	0	2461	0	#DIV/0!	0
contigs_merge_contig_10708	0	0	0	1	#NUM!	0	#NUM!	#NUM!	0	0	0	1	0	1	0	1	1	0	1	0	1	1	0	0	#DIV/0!	0	0	0	contigs_merge_contig_10708	0	267	0	#DIV/0!	0	0	0	#DIV/0!	0	0	0	contigs_merge_contig_10708	0	267	0	#DIV/0!	0
contigs_merge_contig_10709	0.0155154	0.0155154	0.0155154	1.08651	0.119703	0.119703	0.119703	0.951717	0.0267	0.0267	0.0267	1.10887	2.67e-08	1.10887	0.0371266	0.970384	1	2.67e-08	1.10887	0.0371266	0.970384	1	0.179346	0.245245	-2.47918	2	2	0.179346	contigs_merge_contig_10709	0	653	0.245245	-2.47918	0.179346	0.194862	0.271945	-2.35948	2	2	0.194862	contigs_merge_contig_10709	0	653	0.271945	-2.35948	0.194862
contigs_merge_contig_1071	0.303091	0.303091	0.303091	2.17302	1.1197	1.1197	1.1197	0.426501	0.43026	0.43026	0.43026	2.21774	4.3026e-07	2.21774	0.403522	0.686564	1	4.3026e-07	2.21774	0.403522	0.686564	1	0.258385	0.353326	-1.95241	8	8	0.258385	contigs_merge_contig_1071	0	1813	0.353326	-1.95241	0.258385	0.561476	0.783586	-0.832703	15	16	0.561476	contigs_merge_contig_1071	0	1813	0.783586	-0.832703	0.561476
contigs_merge_contig_10710	0.070358	0.070358	0.070358	1.08651	0.119703	0.119703	0.119703	0.598538	0.121077	0.121077	0.121077	1.10887	1.21077e-07	1.10887	0.0790608	0.936984	1	1.21077e-07	1.10887	0.0790608	0.936984	1	0.813285	1.11212	-0.298167	4	5	0.813285	contigs_merge_contig_10710	0	360	1.11212	-0.298167	0.813285	0.883643	1.2332	-0.178464	5	5	0.883643	contigs_merge_contig_10710	0	360	1.2332	-0.178464	0.883643
contigs_merge_contig_10711	0	0	0	1	#NUM!	0	#NUM!	#NUM!	0	0	0	1	0	1	0	1	1	0	1	0	1	1	0	0	#DIV/0!	0	0	0	contigs_merge_contig_10711	0	230	0	#DIV/0!	0	0	0	#DIV/0!	0	0	0	contigs_merge_contig_10711	0	230	0	#DIV/0!	0
contigs_merge_contig_10712	0.556255	0.556255	0.556255	4.34604	2.1197	2.1197	2.1197	0.181151	0.780978	0.780978	0.780978	4.43548	7.80978e-07	4.43548	0.702577	0.482319	1	7.80978e-07	4.43548	0.702578	0.482319	1	0.166243	0.227327	-2.58864	12	17	0.166243	contigs_merge_contig_10712	0	5988	0.227327	-2.58864	0.166243	0.722498	1.0083	-0.468935	53	68	0.722498	contigs_merge_contig_10712	0	5988	1.0083	-0.468935	0.722498
contigs_merge_contig_10713	3.6915	3.6915	3.6915	1.27089	0.345837	0.345837	0.345837	1.09177	5.53528	5.53528	5.53528	1.29704	5.53528e-06	1.29704	0.846056	0.397521	1	5.53528e-06	1.29704	0.846057	0.397521	1	13.6274	18.6347	3.76844	165	165	13.6274	contigs_merge_contig_10713	0	709	18.6347	3.76844	13.6274	17.3189	24.1699	4.11428	191	193	17.3189	contigs_merge_contig_10713	0	709	24.1699	4.11428	17.3189
contigs_merge_contig_10714	0.160634	0.160634	0.160634	1.23467	0.304127	0.304127	0.304127	0.443868	0.243441	0.243441	0.243441	1.26008	2.43441e-07	1.26008	0.167374	0.867076	1	2.43441e-07	1.26008	0.167374	0.867076	1	0.684508	0.936024	-0.546861	20	22	0.684508	contigs_merge_contig_10714	0	1882	0.936024	-0.546861	0.684508	0.845142	1.17946	-0.242734	24	25	0.845142	contigs_merge_contig_10714	0	1882	1.17946	-0.242734	0.845142
contigs_merge_contig_10715	0.0682643	0.0682643	0.0682643	#DIV/0!	#DIV/0!	0	#DIV/0!	0	0.0952684	0.0952684	0.0952684	#DIV/0!	9.52684e-08	#DIV/0!	0.308656	0.757583	1	9.52684e-08	#DIV/0!	0.308656	0.757583	1	0	0	#DIV/0!	0	0	0	contigs_merge_contig_10715	0	932	0	#DIV/0!	0	0.0682643	0.0952684	-3.87273	1	1	0.0682643	contigs_merge_contig_10715	0	932	0.0952684	-3.87273	0.0682643
contigs_merge_contig_10716	0.112716	0.112716	0.112716	1.62977	0.704665	0.704665	0.704665	0.716104	0.162341	0.162341	0.162341	1.66331	1.62341e-07	1.66331	0.201076	0.840639	1	1.62341e-07	1.66331	0.201076	0.840639	1	0.178981	0.244746	-2.48212	3	6	0.178981	contigs_merge_contig_10716	0	1963	0.244746	-2.48212	0.178981	0.291697	0.407087	-1.77746	4	9	0.291697	contigs_merge_contig_10716	0	1963	0.407087	-1.77746	0.291697
contigs_merge_contig_10717	0	0	0	1	#NUM!	0	#NUM!	#NUM!	0	0	0	1	0	1	0	1	1	0	1	0	1	1	0	0	#DIV/0!	0	0	0	contigs_merge_contig_10717	0	586	0	#DIV/0!	0	0	0	#DIV/0!	0	0	0	contigs_merge_contig_10717	0	586	0	#DIV/0!	0
contigs_merge_contig_10718	0.645153	0.645153	0.645153	2.88162	1.52688	1.52688	1.52688	0.0112554	0.910012	0.910012	0.910012	2.94092	9.10012e-07	2.94092	0.669466	0.503198	1	9.10012e-07	2.94092	0.669466	0.503198	1	0.342872	0.468857	-1.54426	14	23	0.342872	contigs_merge_contig_10718	0	3928	0.468857	-1.54426	0.342872	0.988025	1.37887	-0.0173812	37	61	0.988025	contigs_merge_contig_10718	0	3928	1.37887	-0.0173812	0.988025
contigs_merge_contig_10719	6.40436	6.40436	6.40436	2.12867	1.08996	1.08996	1.08996	1.43521	9.09748	9.09748	9.09748	2.17248	9.09748e-06	2.17248	1.83365	0.0667058	1	9.09748e-06	2.17248	1.83365	0.0667057	1	5.67423	7.75917	2.50443	294	294	5.67423	contigs_merge_contig_10719	0	3034	7.75917	2.50443	5.67423	12.0786	16.8567	3.59438	576	576	12.0786	contigs_merge_contig_10719	0	3034	16.8567	3.59438	12.0786
contigs_merge_contig_1072	0.398352	0.398352	0.398352	1.63839	0.712278	0.712278	0.712278	-0.0468637	0.573493	0.573493	0.573493	1.67211	5.73493e-07	1.67211	0.379801	0.704093	1	5.73493e-07	1.67211	0.379801	0.704093	1	0.623995	0.853277	-0.680393	62	63	0.623995	contigs_merge_contig_1072	0	5912	0.853277	-0.680393	0.623995	1.02235	1.42677	0.0318857	94	95	1.02235	contigs_merge_contig_1072	0	5912	1.42677	0.0318857	1.02235
contigs_merge_contig_10720	0.743149	0.743149	0.743149	1.85612	0.892292	0.892292	0.892292	-3.37041	1.06155	1.06155	1.06155	1.89432	1.06155e-06	1.89432	0.572723	0.566833	1	1.06155e-06	1.89432	0.572723	0.566833	1	0.86804	1.18699	-0.204167	24	24	0.86804	contigs_merge_contig_10720	0	1619	1.18699	-0.204167	0.86804	1.61119	2.24855	0.688125	41	41	1.61119	contigs_merge_contig_10720	0	1619	2.24855	0.688125	1.61119
contigs_merge_contig_10721	0.7827	0.7827	0.7827	#DIV/0!	#DIV/0!	0	#DIV/0!	0	1.09232	1.09232	1.09232	#DIV/0!	1.09232e-06	#DIV/0!	1.04514	0.295957	1	1.09232e-06	#DIV/0!	1.04514	0.295957	1	0	0	#DIV/0!	0	0	0	contigs_merge_contig_10721	0	569	0	#DIV/0!	0	0.7827	1.09232	-0.353469	7	7	0.7827	contigs_merge_contig_10721	0	569	1.09232	-0.353469	0.7827
contigs_merge_contig_10722	0.464835	0.464835	0.464835	1.62977	0.704665	0.704665	0.704665	-0.608468	0.669486	0.669486	0.669486	1.66331	6.69486e-07	1.66331	0.408336	0.683027	1	6.69486e-07	1.66331	0.408336	0.683027	1	0.738108	1.00932	-0.438097	6	6	0.738108	contigs_merge_contig_10722	0	476	1.00932	-0.438097	0.738108	1.20294	1.6788	0.266568	9	9	1.20294	contigs_merge_contig_10722	0	476	1.6788	0.266568	1.20294
contigs_merge_contig_10723	0.0365624	0.0365624	-0.0365624	-1.84075	0.880297	0.880297	-0.880297	-0.805384	0.0487731	0.0487731	-0.0487731	-1.80364	-4.87731e-08	-1.80364	-0.118239	0.905879	1	-4.87731e-08	-1.80364	-0.118239	0.905879	1	0.0800499	0.109464	-3.64296	2	2	0.0800499	contigs_merge_contig_10723	0	1463	0.109464	-3.64296	0.0800499	0.0434876	0.0606904	-4.52325	1	1	0.0434876	contigs_merge_contig_10723	0	1463	0.0606904	-4.52325	0.0434876
contigs_merge_contig_10724	0.33415	0.33415	-0.33415	-1.53396	0.617263	0.617263	-0.617263	-0.0872161	0.43932	0.43932	-0.43932	-1.50303	-4.3932e-07	-1.50303	-0.297136	0.766363	1	-4.3932e-07	-1.50303	-0.297136	0.766363	1	0.959943	1.31267	-0.0589792	5	5	0.959943	contigs_merge_contig_10724	0	305	1.31267	-0.0589792	0.959943	0.625793	0.873345	-0.676242	3	3	0.625793	contigs_merge_contig_10724	0	305	0.873345	-0.676242	0.625793
contigs_merge_contig_10725	0.94336	0.94336	0.94336	2.2566	1.17415	1.17415	1.17415	-1.83855	1.33766	1.33766	1.33766	2.30304	1.33766e-06	2.30304	0.726433	0.467574	1	1.33766e-06	2.30304	0.726433	0.467574	1	0.750725	1.02657	-0.413644	13	13	0.750725	contigs_merge_contig_10725	0	1014	1.02657	-0.413644	0.750725	1.69408	2.36423	0.760506	27	27	1.69408	contigs_merge_contig_10725	0	1014	2.36423	0.760506	1.69408
contigs_merge_contig_10726	0	0	0	1	#NUM!	0	#NUM!	#NUM!	0	0	0	1	0	1	0	1	1	0	1	0	1	1	0	0	#DIV/0!	0	0	0	contigs_merge_contig_10726	0	901	0	#DIV/0!	0	0	0	#DIV/0!	0	0	0	contigs_merge_contig_10726	0	901	0	#DIV/0!	0
contigs_merge_contig_10727	0.216402	0.216402	0.216402	#DIV/0!	#DIV/0!	0	#DIV/0!	0	0.302007	0.302007	0.302007	#DIV/0!	3.02007e-07	#DIV/0!	0.549552	0.582627	1	3.02007e-07	#DIV/0!	0.549552	0.582627	1	0	0	#DIV/0!	0	0	0	contigs_merge_contig_10727	0	588	0	#DIV/0!	0	0.216402	0.302007	-2.20821	2	2	0.216402	contigs_merge_contig_10727	0	588	0.302007	-2.20821	0.216402
contigs_merge_contig_10728	0.0655089	0.0655089	-0.0655089	-1.1176	0.160405	0.160405	-0.160405	-0.809977	0.0739038	0.0739038	-0.0739038	-1.09507	-7.39038e-08	-1.09507	-0.057909	0.953821	1	-7.39038e-08	-1.09507	-0.057909	0.953821	1	0.622552	0.851303	-0.683733	34	34	0.622552	contigs_merge_contig_10728	0	3198	0.851303	-0.683733	0.622552	0.557043	0.777399	-0.844139	28	28	0.557043	contigs_merge_contig_10728	0	3198	0.777399	-0.844139	0.557043
contigs_merge_contig_10729	0.00512828	0.00512828	0.00512828	1.01408	0.0201668	0.0201668	0.0201668	0.986156	0.0174089	0.0174089	0.0174089	1.03495	1.74089e-08	1.03495	0.0172905	0.986205	1	1.74089e-08	1.03495	0.0172905	0.986205	1	0.364309	0.49817	-1.45677	14	15	0.364309	contigs_merge_contig_10729	0	2411	0.49817	-1.45677	0.364309	0.369437	0.515579	-1.4366	14	14	0.369437	contigs_merge_contig_10729	0	2411	0.515579	-1.4366	0.369437
contigs_merge_contig_1073	0.0324209	0.0324209	0.0324209	1.08651	0.119703	0.119703	0.119703	0.915462	0.0557922	0.0557922	0.0557922	1.10887	5.57922e-08	1.10887	0.0536682	0.9572	1	5.57922e-08	1.10887	0.0536682	0.9572	1	0.374762	0.512464	-1.41595	5	8	0.374762	contigs_merge_contig_1073	0	1250	0.512464	-1.41595	0.374762	0.407183	0.568257	-1.29625	8	8	0.407183	contigs_merge_contig_1073	0	1250	0.568257	-1.29625	0.407183
contigs_merge_contig_10730	0.607131	0.607131	-0.607131	-3.68151	1.8803	1.8803	-1.8803	-0.122572	0.823844	0.823844	-0.823844	-3.60727	-8.23844e-07	-3.60727	-0.682801	0.494733	1	-8.23844e-07	-3.60727	-0.682801	0.494733	1	0.833545	1.13982	-0.262668	4	4	0.833545	contigs_merge_contig_10730	0	281	1.13982	-0.262668	0.833545	0.226414	0.315979	-2.14297	1	1	0.226414	contigs_merge_contig_10730	0	281	0.315979	-2.14297	0.226414
contigs_merge_contig_10731	1.57809	1.57809	1.57809	2.51256	1.32916	1.32916	1.32916	22.723	2.23171	2.23171	2.23171	2.56426	2.23171e-06	2.56426	0.989667	0.322337	1	2.23171e-06	2.56426	0.989667	0.322337	1	1.04332	1.42668	0.0611865	16	16	1.04332	contigs_merge_contig_10731	0	898	1.42668	0.0611865	1.04332	2.62141	3.65839	1.39034	37	37	2.62141	contigs_merge_contig_10731	0	898	3.65839	1.39034	2.62141
contigs_merge_contig_10732	0.726106	0.726106	0.726106	1.85612	0.892292	0.892292	0.892292	-2.75485	1.03721	1.03721	1.03721	1.89432	1.03721e-06	1.89432	0.566117	0.571314	1	1.03721e-06	1.89432	0.566117	0.571314	1	0.848133	1.15977	-0.237637	24	24	0.848133	contigs_merge_contig_10732	0	1657	1.15977	-0.237637	0.848133	1.57424	2.19698	0.654655	41	41	1.57424	contigs_merge_contig_10732	0	1657	2.19698	0.654655	1.57424
contigs_merge_contig_10733	0.0498217	0.0498217	0.0498217	#DIV/0!	#DIV/0!	0	#DIV/0!	0	0.0695302	0.0695302	0.0695302	#DIV/0!	6.95302e-08	#DIV/0!	0.263686	0.792022	1	6.95302e-08	#DIV/0!	0.263686	0.792022	1	0	0	#DIV/0!	0	0	0	contigs_merge_contig_10733	0	1277	0	#DIV/0!	0	0.0498217	0.0695302	-4.32708	1	1	0.0498217	contigs_merge_contig_10733	0	1277	0.0695302	-4.32708	0.0498217
contigs_merge_contig_10734	0.518687	0.518687	-0.518687	-4.02665	2.00958	2.00958	-2.00958	-0.210315	0.704451	0.704451	-0.704451	-3.94546	-7.04451e-07	-3.94546	-0.647737	0.517155	1	-7.04451e-07	-3.94546	-0.647737	0.517155	1	0.69006	0.943616	-0.535206	35	35	0.69006	contigs_merge_contig_10734	0	2970	0.943616	-0.535206	0.69006	0.171373	0.239165	-2.54479	8	8	0.171373	contigs_merge_contig_10734	0	2970	0.239165	-2.54479	0.171373
contigs_merge_contig_10735	0.336926	0.336926	0.336926	1.20088	0.264092	0.264092	0.264092	1.35397	0.517407	0.517407	0.517407	1.22559	5.17407e-07	1.22559	0.229011	0.81886	1	5.17407e-07	1.22559	0.229011	0.81886	1	1.67725	2.29354	0.746095	114	114	1.67725	contigs_merge_contig_10735	0	3980	2.29354	0.746095	1.67725	2.01417	2.81094	1.01019	125	126	2.01417	contigs_merge_contig_10735	0	3980	2.81094	1.01019	2.01417
contigs_merge_contig_10736	0.0221213	0.0221213	0.0221213	1.08651	0.119703	0.119703	0.119703	0.939158	0.0380678	0.0380678	0.0380678	1.10887	3.80678e-08	1.10887	0.0443312	0.96464	1	3.80678e-08	1.10887	0.0443312	0.96464	1	0.255705	0.349662	-1.96745	1	1	0.255705	contigs_merge_contig_10736	0	229	0.349662	-1.96745	0.255705	0.277827	0.38773	-1.84774	1	1	0.277827	contigs_merge_contig_10736	0	229	0.38773	-1.84774	0.277827
contigs_merge_contig_10737	0.249563	0.249563	0.249563	1.90139	0.927057	0.927057	0.927057	0.499633	0.356076	0.356076	0.356076	1.94052	3.56076e-07	1.94052	0.337477	0.735757	1	3.56076e-07	1.94052	0.337477	0.735757	1	0.276863	0.378594	-1.85276	8	8	0.276863	contigs_merge_contig_10737	0	1692	0.378594	-1.85276	0.276863	0.526426	0.73467	-0.925698	14	14	0.526426	contigs_merge_contig_10737	0	1692	0.73467	-0.925698	0.526426
contigs_merge_contig_10738	0.188316	0.188316	-0.188316	-1.14714	0.198038	0.198038	-0.198038	-1.5563	0.221494	0.221494	-0.221494	-1.12401	-2.21494e-07	-1.12401	-0.113717	0.909462	1	-2.21494e-07	-1.12401	-0.113717	0.909462	1	1.46818	2.00765	0.55403	86	86	1.46818	contigs_merge_contig_10738	0	3430	2.00765	0.55403	1.46818	1.27987	1.78616	0.355992	68	69	1.27987	contigs_merge_contig_10738	0	3430	1.78616	0.355992	1.27987
contigs_merge_contig_10739	1.69812	1.69812	-1.69812	-1.84075	0.880297	0.880297	-0.880297	-1.86799	2.26524	2.26524	-2.26524	-1.80364	-2.26524e-06	-1.80364	-0.8058	0.420358	1	-2.26524e-06	-1.80364	-0.8058	0.420358	1	3.71787	5.08397	1.89448	16	16	3.71787	contigs_merge_contig_10739	0	252	5.08397	1.89448	3.71787	2.01976	2.81873	1.01418	8	8	2.01976	contigs_merge_contig_10739	0	252	2.81873	1.01418	2.01976
contigs_merge_contig_1074	0.0777454	0.0777454	0.0777454	2.17302	1.1197	1.1197	1.1197	0.714021	0.110365	0.110365	0.110365	2.21774	1.10365e-07	2.21774	0.20437	0.838064	1	1.10365e-07	2.21774	0.20437	0.838064	1	0.0662779	0.0906311	-3.91533	2	2	0.0662779	contigs_merge_contig_1074	0	1767	0.0906311	-3.91533	0.0662779	0.144023	0.200996	-2.79563	4	4	0.144023	contigs_merge_contig_1074	0	1767	0.200996	-2.79563	0.144023
contigs_merge_contig_10740	1.44137	1.44137	-1.44137	-1.84075	0.880297	0.880297	-0.880297	-2.13195	1.92274	1.92274	-1.92274	-1.80364	-1.92274e-06	-1.80364	-0.742387	0.457853	1	-1.92274e-06	-1.80364	-0.742387	0.457853	1	3.15574	4.31529	1.65798	18	18	3.15574	contigs_merge_contig_10740	0	334	4.31529	1.65798	3.15574	1.71437	2.39255	0.777681	9	9	1.71437	contigs_merge_contig_10740	0	334	2.39255	0.777681	1.71437
contigs_merge_contig_10741	1.57633	1.57633	1.57633	2.34458	1.22933	1.22933	1.22933	6.35838	2.23289	2.23289	2.23289	2.39283	2.23289e-06	2.39283	0.957419	0.338356	1	2.23289e-06	2.39283	0.957419	0.338356	1	1.17236	1.60314	0.229421	38	38	1.17236	contigs_merge_contig_10741	0	1898	1.60314	0.229421	1.17236	2.7487	3.83603	1.45875	82	82	2.7487	contigs_merge_contig_10741	0	1898	3.83603	1.45875	2.7487
contigs_merge_contig_10742	0.490013	0.490013	-0.490013	#DIV/0!	#DIV/0!	0	#DIV/0!	0	0.670063	0.670063	-0.670063	#DIV/0!	-6.70063e-07	#DIV/0!	-0.818574	0.413029	1	-6.70063e-07	#DIV/0!	-0.818574	0.41303	1	0.490013	0.670063	-1.02911	3	6	0.490013	contigs_merge_contig_10742	0	717	0.670063	-1.02911	0.490013	0	0	#DIV/0!	0	0	0	contigs_merge_contig_10742	0	717	0	#DIV/0!	0
contigs_merge_contig_10743	7.44976	7.44976	7.44976	4.21377	2.07511	2.07511	2.07511	2.71083	10.462	10.462	10.462	4.30049	1.0462e-05	4.30049	2.55235	0.0107	0.849414	1.0462e-05	4.30049	2.55235	0.0106999	0.849412	2.31807	3.16983	1.21293	22	115	2.31807	contigs_merge_contig_10743	0	2905	3.16983	1.21293	2.31807	9.76783	13.6318	3.28804	97	446	9.76783	contigs_merge_contig_10743	0	2905	13.6318	3.28804	9.76783
contigs_merge_contig_10744	0.497618	0.497618	0.497618	1.77273	0.825971	0.825971	0.825971	-0.300899	0.712588	0.712588	0.712588	1.80921	7.12588e-07	1.80921	0.453062	0.650504	1	7.12588e-07	1.80921	0.453062	0.650504	1	0.643975	0.880597	-0.634924	48	57	0.643975	contigs_merge_contig_10744	0	5183	0.880597	-0.634924	0.643975	1.14159	1.59319	0.191048	77	93	1.14159	contigs_merge_contig_10744	0	5183	1.59319	0.191048	1.14159
contigs_merge_contig_10745	0.127471	0.127471	-0.127471	-2.76113	1.46526	1.46526	-1.46526	-0.61321	0.172273	0.172273	-0.172273	-2.70546	-1.72273e-07	-2.70546	-0.281584	0.778263	1	-1.72273e-07	-2.70546	-0.281584	0.778263	1	0.199852	0.273285	-2.323	3	3	0.199852	contigs_merge_contig_10745	0	879	0.273285	-2.323	0.199852	0.0723803	0.101013	-3.78826	1	1	0.0723803	contigs_merge_contig_10745	0	879	0.101013	-3.78826	0.0723803
contigs_merge_contig_10746	0.294053	0.294053	0.294053	1.90139	0.927057	0.927057	0.927057	0.426355	0.419555	0.419555	0.419555	1.94052	4.19555e-07	1.94052	0.366325	0.714122	1	4.19555e-07	1.94052	0.366325	0.714122	1	0.32622	0.446087	-1.61608	8	8	0.32622	contigs_merge_contig_10746	0	1436	0.446087	-1.61608	0.32622	0.620273	0.865642	-0.689024	14	14	0.620273	contigs_merge_contig_10746	0	1436	0.865642	-0.689024	0.620273
contigs_merge_contig_10747	0.240994	0.240994	0.240994	#DIV/0!	#DIV/0!	0	#DIV/0!	0	0.336326	0.336326	0.336326	#DIV/0!	3.36326e-07	#DIV/0!	0.579936	0.561958	1	3.36326e-07	#DIV/0!	0.579936	0.561958	1	0	0	#DIV/0!	0	0	0	contigs_merge_contig_10747	0	264	0	#DIV/0!	0	0.240994	0.336326	-2.05293	1	1	0.240994	contigs_merge_contig_10747	0	264	0.336326	-2.05293	0.240994
contigs_merge_contig_10748	0	0	0	1	#NUM!	0	#NUM!	#NUM!	0	0	0	1	0	1	0	1	1	0	1	0	1	1	0	0	#DIV/0!	0	0	0	contigs_merge_contig_10748	0	1568	0	#DIV/0!	0	0	0	#DIV/0!	0	0	0	contigs_merge_contig_10748	0	1568	0	#DIV/0!	0
contigs_merge_contig_10749	0.623826	0.623826	0.623826	1.28406	0.360711	0.360711	0.360711	1.31782	0.932401	0.932401	0.932401	1.31048	9.32401e-07	1.31048	0.353973	0.723359	1	9.32401e-07	1.31048	0.353973	0.723359	1	2.19612	3.00306	1.13496	95	110	2.19612	contigs_merge_contig_10749	0	2933	3.00306	1.13496	2.19612	2.81995	3.93546	1.49567	112	130	2.81995	contigs_merge_contig_10749	0	2933	3.93546	1.49567	2.81995
contigs_merge_contig_1075	0.0968047	0.0968047	0.0968047	4.34604	2.1197	2.1197	2.1197	0.585286	0.135913	0.135913	0.135913	4.43548	1.35913e-07	4.43548	0.293093	0.769451	1	1.35913e-07	4.43548	0.293093	0.769451	1	0.0289311	0.0395615	-5.11124	1	3	0.0289311	contigs_merge_contig_1075	0	6072	0.0395615	-5.11124	0.0289311	0.125736	0.175475	-2.99153	3	12	0.125736	contigs_merge_contig_1075	0	6072	0.175475	-2.99153	0.125736
contigs_merge_contig_10750	0	0	0	1	#NUM!	0	#NUM!	#NUM!	0	0	0	1	0	1	0	1	1	0	1	0	1	1	0	0	#DIV/0!	0	0	0	contigs_merge_contig_10750	0	1268	0	#DIV/0!	0	0	0	#DIV/0!	0	0	0	contigs_merge_contig_10750	0	1268	0	#DIV/0!	0
contigs_merge_contig_10751	0	0	0	1	#NUM!	0	#NUM!	#NUM!	0	0	0	1	0	1	0	1	1	0	1	0	1	1	0	0	#DIV/0!	0	0	0	contigs_merge_contig_10751	0	2242	0	#DIV/0!	0	0	0	#DIV/0!	0	0	0	contigs_merge_contig_10751	0	2242	0	#DIV/0!	0
contigs_merge_contig_10752	0.127972	0.127972	0.127972	1.35814	0.441631	0.441631	0.441631	0.702544	0.18865	0.18865	0.18865	1.38609	1.8865e-07	1.38609	0.174714	0.861304	1	1.8865e-07	1.38609	0.174714	0.861304	1	0.357324	0.48862	-1.48469	32	32	0.357324	contigs_merge_contig_10752	0	5244	0.48862	-1.48469	0.357324	0.485296	0.67727	-1.04306	40	40	0.485296	contigs_merge_contig_10752	0	5244	0.67727	-1.04306	0.485296
contigs_merge_contig_10753	1.27007	1.27007	1.27007	1.82991	0.871775	0.871775	0.871775	2.42012	1.81555	1.81555	1.81555	1.86757	1.81555e-06	1.86757	0.74114	0.458609	1	1.81555e-06	1.86757	0.74114	0.458609	1	1.53036	2.09268	0.613874	9	19	1.53036	contigs_merge_contig_10753	0	727	2.09268	0.613874	1.53036	2.80043	3.90823	1.48565	4	32	2.80043	contigs_merge_contig_10753	0	727	3.90823	1.48565	2.80043
contigs_merge_contig_10754	0	0	0	1	#NUM!	0	#NUM!	#NUM!	0	0	0	1	0	1	0	1	1	0	1	0	1	1	0	0	#DIV/0!	0	0	0	contigs_merge_contig_10754	0	319	0	#DIV/0!	0	0	0	#DIV/0!	0	0	0	contigs_merge_contig_10754	0	319	0	#DIV/0!	0
contigs_merge_contig_10755	0.0411501	0.0411501	-0.0411501	#DIV/0!	#DIV/0!	0	#DIV/0!	0	0.0562703	0.0562703	-0.0562703	#DIV/0!	-5.62703e-08	#DIV/0!	-0.237214	0.812491	1	-5.62703e-08	#DIV/0!	-0.237214	0.812491	1	0.0411501	0.0562703	-4.60296	0	2	0.0411501	contigs_merge_contig_10755	0	2846	0.0562703	-4.60296	0.0411501	0	0	#DIV/0!	0	0	0	contigs_merge_contig_10755	0	2846	0	#DIV/0!	0
contigs_merge_contig_10756	0	0	0	1	#NUM!	0	#NUM!	#NUM!	0	0	0	1	0	1	0	1	1	0	1	0	1	1	0	0	#DIV/0!	0	0	0	contigs_merge_contig_10756	0	368	0	#DIV/0!	0	0	0	#DIV/0!	0	0	0	contigs_merge_contig_10756	0	368	0	#DIV/0!	0
contigs_merge_contig_10757	0	0	0	1	#NUM!	0	#NUM!	#NUM!	0	0	0	1	0	1	0	1	1	0	1	0	1	1	0	0	#DIV/0!	0	0	0	contigs_merge_contig_10757	0	2143	0	#DIV/0!	0	0	0	#DIV/0!	0	0	0	contigs_merge_contig_10757	0	2143	0	#DIV/0!	0
contigs_merge_contig_10758	0.0338848	0.0338848	0.0338848	1.08651	0.119703	0.119703	0.119703	0.911479	0.0583113	0.0583113	0.0583113	1.10887	5.83113e-08	1.10887	0.0548664	0.956245	1	5.83113e-08	1.10887	0.0548664	0.956245	1	0.391682	0.535602	-1.35224	4	4	0.391682	contigs_merge_contig_10758	0	598	0.535602	-1.35224	0.391682	0.425567	0.593914	-1.23254	4	4	0.425567	contigs_merge_contig_10758	0	598	0.593914	-1.23254	0.425567
contigs_merge_contig_10759	0.0864433	0.0864433	0.0864433	#DIV/0!	#DIV/0!	0	#DIV/0!	0	0.120639	0.120639	0.120639	#DIV/0!	1.20639e-07	#DIV/0!	0.347331	0.728343	1	1.20639e-07	#DIV/0!	0.347331	0.728343	1	0	0	#DIV/0!	0	0	0	contigs_merge_contig_10759	0	1472	0	#DIV/0!	0	0.0864433	0.120639	-3.5321	2	2	0.0864433	contigs_merge_contig_10759	0	1472	0.120639	-3.5321	0.0864433
contigs_merge_contig_1076	0.0925461	0.0925461	0.0925461	8.69209	3.1197	3.1197	3.1197	0.510793	0.129494	0.129494	0.129494	8.87096	1.29494e-07	8.87096	0.321336	0.747956	1	1.29494e-07	8.87096	0.321336	0.747956	1	0.0120313	0.0164521	-6.37706	0	1	0.0120313	contigs_merge_contig_1076	0	4867	0.0164521	-6.37706	0.0120313	0.104577	0.145946	-3.25736	2	8	0.104577	contigs_merge_contig_1076	0	4867	0.145946	-3.25736	0.104577
contigs_merge_contig_10760	0.107246	0.107246	-0.107246	#DIV/0!	#DIV/0!	0	#DIV/0!	0	0.146653	0.146653	-0.146653	#DIV/0!	-1.46653e-07	#DIV/0!	-0.382953	0.701755	1	-1.46653e-07	#DIV/0!	-0.382953	0.701755	1	0.107246	0.146653	-3.221	2	2	0.107246	contigs_merge_contig_10760	0	1092	0.146653	-3.221	0.107246	0	0	#DIV/0!	0	0	0	contigs_merge_contig_10760	0	1092	0	#DIV/0!	0
contigs_merge_contig_10761	0.0681911	0.0681911	0.0681911	#DIV/0!	#DIV/0!	0	#DIV/0!	0	0.0951662	0.0951662	0.0951662	#DIV/0!	9.51662e-08	#DIV/0!	0.30849	0.757709	1	9.51662e-08	#DIV/0!	0.30849	0.757709	1	0	0	#DIV/0!	0	0	0	contigs_merge_contig_10761	0	933	0	#DIV/0!	0	0.0681911	0.0951662	-3.87427	1	1	0.0681911	contigs_merge_contig_10761	0	933	0.0951662	-3.87427	0.0681911
contigs_merge_contig_10762	0.841887	0.841887	0.841887	2.17302	1.1197	1.1197	1.1197	-1.33987	1.19512	1.19512	1.19512	2.21774	1.19512e-06	2.21774	0.672524	0.50125	1	1.19512e-06	2.21774	0.672524	0.50125	1	0.717708	0.981423	-0.478531	17	17	0.717708	contigs_merge_contig_10762	0	1387	0.981423	-0.478531	0.717708	1.55959	2.17654	0.641171	34	34	1.55959	contigs_merge_contig_10762	0	1387	2.17654	0.641171	1.55959
contigs_merge_contig_10763	5.64288	5.64288	5.64288	1.34869	0.431554	0.431554	0.431554	1.10745	8.33051	8.33051	8.33051	1.37644	8.33051e-06	1.37644	1.14875	0.250659	1	8.33051e-06	1.37644	1.14875	0.250659	1	16.1833	22.1297	4.01643	862	862	16.1833	contigs_merge_contig_10763	0	3119	22.1297	4.01643	16.1833	21.8262	30.4602	4.44799	1070	1070	21.8262	contigs_merge_contig_10763	0	3119	30.4602	4.44799	21.8262
contigs_merge_contig_10764	0.138061	0.138061	-0.138061	-1.09569	0.131836	0.131836	-0.131836	-1.24926	0.148188	0.148188	-0.148188	-1.07359	-1.48188e-07	-1.07359	-0.0725212	0.942187	1	-1.48188e-07	-1.07359	-0.0725212	0.942187	1	1.5809	2.16179	0.660746	50	50	1.5809	contigs_merge_contig_10764	0	1852	2.16179	0.660746	1.5809	1.44284	2.0136	0.52891	42	42	1.44284	contigs_merge_contig_10764	0	1852	2.0136	0.52891	1.44284
contigs_merge_contig_10765	0.413161	0.413161	0.413161	2.17302	1.1197	1.1197	1.1197	0.256235	0.586512	0.586512	0.586512	2.21774	5.86512e-07	2.21774	0.47113	0.637548	1	5.86512e-07	2.21774	0.47113	0.637548	1	0.35222	0.48164	-1.50545	4	4	0.35222	contigs_merge_contig_10765	0	665	0.48164	-1.50545	0.35222	0.765381	1.06815	-0.38575	8	8	0.765381	contigs_merge_contig_10765	0	665	1.06815	-0.38575	0.765381
contigs_merge_contig_10766	0.0505541	0.0505541	0.0505541	#DIV/0!	#DIV/0!	0	#DIV/0!	0	0.0705523	0.0705523	0.0705523	#DIV/0!	7.05523e-08	#DIV/0!	0.265617	0.790534	1	7.05523e-08	#DIV/0!	0.265617	0.790534	1	0	0	#DIV/0!	0	0	0	contigs_merge_contig_10766	0	2517	0	#DIV/0!	0	0.0505541	0.0705523	-4.30603	2	2	0.0505541	contigs_merge_contig_10766	0	2517	0.0705523	-4.30603	0.0505541
contigs_merge_contig_10767	0.193896	0.193896	-0.193896	#DIV/0!	#DIV/0!	0	#DIV/0!	0	0.265141	0.265141	-0.265141	#DIV/0!	-2.65141e-07	#DIV/0!	-0.514918	0.60661	1	-2.65141e-07	#DIV/0!	-0.514918	0.60661	1	0.193896	0.265141	-2.36665	1	1	0.193896	contigs_merge_contig_10767	0	302	0.265141	-2.36665	0.193896	0	0	#DIV/0!	0	0	0	contigs_merge_contig_10767	0	302	0	#DIV/0!	0
contigs_merge_contig_10768	2641.32	2641.32	-2641.32	-1.2906	0.368047	0.368047	-0.368047	-1.02799	3356.07	3356.07	-3356.07	-1.26458	-0.00335607	-1.26458	-19.9454	0	0	-0.00335607	-1.26458	-19.9473	1.61278e-88	1.31576e-85	11730.4	16040.6	13.518	189010	212746	11730.4	contigs_merge_contig_10768	0	1062	16040.6	13.518	11730.4	9089.06	12684.5	13.1499	132494	151717	9089.06	contigs_merge_contig_10768	0	1062	12684.5	13.1499	9089.06
contigs_merge_contig_10769	0.304982	0.304982	-0.304982	#DIV/0!	#DIV/0!	0	#DIV/0!	0	0.417045	0.417045	-0.417045	#DIV/0!	-4.17045e-07	#DIV/0!	-0.64579	0.518415	1	-4.17045e-07	#DIV/0!	-0.64579	0.518415	1	0.304982	0.417045	-1.7132	2	2	0.304982	contigs_merge_contig_10769	0	384	0.417045	-1.7132	0.304982	0	0	#DIV/0!	0	0	0	contigs_merge_contig_10769	0	384	0	#DIV/0!	0
contigs_merge_contig_1077	0.723617	0.723617	0.723617	2.49897	1.32134	1.32134	1.32134	-0.257604	1.02345	1.02345	1.02345	2.5504	1.02345e-06	2.5504	0.668524	0.503799	1	1.02345e-06	2.5504	0.668525	0.503799	1	0.482741	0.66012	-1.05068	9	10	0.482741	contigs_merge_contig_1077	0	1213	0.66012	-1.05068	0.482741	1.20636	1.68357	0.270659	21	23	1.20636	contigs_merge_contig_1077	0	1213	1.68357	0.270659	1.20636
contigs_merge_contig_10770	0	0	0	1	#NUM!	0	#NUM!	#NUM!	0	0	0	1	0	1	0	1	1	0	1	0	1	1	0	0	#DIV/0!	0	0	0	contigs_merge_contig_10770	0	255	0	#DIV/0!	0	0	0	#DIV/0!	0	0	0	contigs_merge_contig_10770	0	255	0	#DIV/0!	0
contigs_merge_contig_10771	0	0	0	1	#NUM!	0	#NUM!	#NUM!	0	0	0	1	0	1	0	1	1	0	1	0	1	1	0	0	#DIV/0!	0	0	0	contigs_merge_contig_10771	0	345	0	#DIV/0!	0	0	0	#DIV/0!	0	0	0	contigs_merge_contig_10771	0	345	0	#DIV/0!	0
contigs_merge_contig_10772	0.193675	0.193675	0.193675	#DIV/0!	#DIV/0!	0	#DIV/0!	0	0.27029	0.27029	0.27029	#DIV/0!	2.7029e-07	#DIV/0!	0.519894	0.603138	1	2.7029e-07	#DIV/0!	0.519894	0.603138	1	0	0	#DIV/0!	0	0	0	contigs_merge_contig_10772	0	657	0	#DIV/0!	0	0.193675	0.27029	-2.36829	2	2	0.193675	contigs_merge_contig_10772	0	657	0.27029	-2.36829	0.193675
contigs_merge_contig_10773	0.456831	0.456831	0.456831	1.4237	0.509649	0.509649	0.509649	5.69277	0.667885	0.667885	0.667885	1.453	6.67885e-07	1.453	0.351199	0.725439	1	6.67885e-07	1.453	0.351199	0.725439	1	1.07818	1.47435	0.108603	2	29	1.07818	contigs_merge_contig_10773	0	1575	1.47435	0.108603	1.07818	1.53501	2.14224	0.618252	4	38	1.53501	contigs_merge_contig_10773	0	1575	2.14224	0.618252	1.53501
contigs_merge_contig_10774	0.320224	0.320224	0.320224	2.17302	1.1197	1.1197	1.1197	0.402212	0.454581	0.454581	0.454581	2.21774	4.54581e-07	2.21774	0.41477	0.67831	1	4.54581e-07	2.21774	0.41477	0.67831	1	0.272991	0.373299	-1.87308	5	12	0.272991	contigs_merge_contig_10774	0	2574	0.373299	-1.87308	0.272991	0.593215	0.82788	-0.753373	16	24	0.593215	contigs_merge_contig_10774	0	2574	0.82788	-0.753373	0.593215
contigs_merge_contig_10775	3.32784	3.32784	3.32784	14.6679	3.87459	3.87459	3.87459	-0.901047	4.65112	4.65112	4.65112	14.9698	4.65112e-06	14.9698	2.01709	0.0436865	1	4.65112e-06	14.9698	2.01709	0.0436865	1	0.243478	0.332942	-2.03813	2	2	0.243478	contigs_merge_contig_10775	0	481	0.332942	-2.03813	0.243478	3.57131	4.98406	1.83646	27	27	3.57131	contigs_merge_contig_10775	0	481	4.98406	1.83646	3.57131
contigs_merge_contig_10776	0	0	0	1	#NUM!	0	#NUM!	#NUM!	0	0	0	1	0	1	0	1	1	0	1	0	1	1	0	0	#DIV/0!	0	0	0	contigs_merge_contig_10776	0	2357	0	#DIV/0!	0	0	0	#DIV/0!	0	0	0	contigs_merge_contig_10776	0	2357	0	#DIV/0!	0
contigs_merge_contig_10777	0	0	0	1	#NUM!	0	#NUM!	#NUM!	0	0	0	1	0	1	0	1	1	0	1	0	1	1	0	0	#DIV/0!	0	0	0	contigs_merge_contig_10777	0	952	0	#DIV/0!	0	0	0	#DIV/0!	0	0	0	contigs_merge_contig_10777	0	952	0	#DIV/0!	0
contigs_merge_contig_10778	0.292489	0.292489	0.292489	1.81085	0.856668	0.856668	0.856668	0.417651	0.418343	0.418343	0.418343	1.84812	4.18343e-07	1.84812	0.352952	0.724125	1	4.18343e-07	1.84812	0.352952	0.724125	1	0.360718	0.49326	-1.47106	3	3	0.360718	contigs_merge_contig_10778	0	487	0.49326	-1.47106	0.360718	0.653206	0.911603	-0.614389	5	5	0.653206	contigs_merge_contig_10778	0	487	0.911603	-0.614389	0.653206
contigs_merge_contig_10779	0.0471047	0.0471047	0.0471047	1.22232	0.289628	0.289628	0.289628	0.870628	0.0717008	0.0717008	0.0717008	1.24748	7.17008e-08	1.24748	0.0888553	0.929197	1	7.17008e-08	1.24748	0.0888553	0.929197	1	0.211873	0.289724	-2.23873	16	16	0.211873	contigs_merge_contig_10779	0	4422	0.289724	-2.23873	0.211873	0.258978	0.361425	-1.9491	18	18	0.258978	contigs_merge_contig_10779	0	4422	0.361425	-1.9491	0.258978
contigs_merge_contig_1078	0	0	0	1	#NUM!	0	#NUM!	#NUM!	0	0	0	1	0	1	0	1	1	0	1	0	1	1	0	0	#DIV/0!	0	0	0	contigs_merge_contig_1078	0	655	0	#DIV/0!	0	0	0	#DIV/0!	0	0	0	contigs_merge_contig_1078	0	655	0	#DIV/0!	0
contigs_merge_contig_10780	0.1411	0.1411	-0.1411	#DIV/0!	#DIV/0!	0	#DIV/0!	0	0.192946	0.192946	-0.192946	#DIV/0!	-1.92946e-07	#DIV/0!	-0.439256	0.660476	1	-1.92946e-07	#DIV/0!	-0.439256	0.660476	1	0.1411	0.192946	-2.82521	1	1	0.1411	contigs_merge_contig_10780	0	415	0.192946	-2.82521	0.1411	0	0	#DIV/0!	0	0	0	contigs_merge_contig_10780	0	415	0	#DIV/0!	0
contigs_merge_contig_10781	0.185488	0.185488	0.185488	#DIV/0!	#DIV/0!	0	#DIV/0!	0	0.258863	0.258863	0.258863	#DIV/0!	2.58863e-07	#DIV/0!	0.508786	0.610902	1	2.58863e-07	#DIV/0!	0.508786	0.610902	1	0	0	#DIV/0!	0	0	0	contigs_merge_contig_10781	0	1372	0	#DIV/0!	0	0.185488	0.258863	-2.4306	2	4	0.185488	contigs_merge_contig_10781	0	1372	0.258863	-2.4306	0.185488
contigs_merge_contig_10782	62.3791	62.3791	62.3791	1.2816	0.35794	0.35794	0.35794	1.04594	93.2889	93.2889	93.2889	1.30797	9.32889e-05	1.30797	3.52882	0.000417416	0.0580975	9.32889e-05	1.30797	3.52883	0.000417408	0.0580964	221.52	302.916	7.7913	0	2005	221.52	contigs_merge_contig_10782	0	530	302.916	7.7913	221.52	283.9	396.205	8.14924	0	2365	283.9	contigs_merge_contig_10782	0	530	396.205	8.14924	283.9
contigs_merge_contig_10783	4.36479	4.36479	4.36479	1.91498	0.937326	0.937326	0.937326	1.41583	6.22566	6.22566	6.22566	1.95438	6.22566e-06	1.95438	1.41815	0.156146	1	6.22566e-06	1.95438	1.41815	0.156146	1	4.77039	6.52322	2.25411	80	80	4.77039	contigs_merge_contig_10783	0	982	6.52322	2.25411	4.77039	9.13518	12.7489	3.19143	141	141	9.13518	contigs_merge_contig_10783	0	982	12.7489	3.19143	9.13518
contigs_merge_contig_10784	0.0714233	0.0714233	-0.0714233	-1.38057	0.46526	0.46526	-0.46526	-0.80724	0.0923857	0.0923857	-0.0923857	-1.35273	-9.23857e-08	-1.35273	-0.117689	0.906314	1	-9.23857e-08	-1.35273	-0.117689	0.906314	1	0.2591	0.354303	-1.94842	3	3	0.2591	contigs_merge_contig_10784	0	678	0.354303	-1.94842	0.2591	0.187676	0.261918	-2.41368	2	2	0.187676	contigs_merge_contig_10784	0	678	0.261918	-2.41368	0.187676
contigs_merge_contig_10785	2.22272	2.22272	-2.22272	-1.4032	0.488719	0.488719	-0.488719	-1.19844	2.88431	2.88431	-2.88431	-1.3749	-2.88431e-06	-1.3749	-0.674776	0.499818	1	-2.88431e-06	-1.3749	-0.674776	0.499818	1	7.73545	10.5778	2.95149	93	93	7.73545	contigs_merge_contig_10785	0	704	10.5778	2.95149	7.73545	5.51273	7.69346	2.46277	61	61	5.51273	contigs_merge_contig_10785	0	704	7.69346	2.46277	5.51273
contigs_merge_contig_10786	0.135261	0.135261	0.135261	2.71628	1.44163	1.44163	1.44163	0.606699	0.190986	0.190986	0.190986	2.77218	1.90986e-07	2.77218	0.299542	0.764526	1	1.90986e-07	2.77218	0.299542	0.764526	1	0.0788109	0.107769	-3.66546	6	6	0.0788109	contigs_merge_contig_10786	0	4458	0.107769	-3.66546	0.0788109	0.214072	0.298755	-2.22383	15	15	0.214072	contigs_merge_contig_10786	0	4458	0.298755	-2.22383	0.214072
contigs_merge_contig_10787	0.836735	0.836735	0.836735	1.42281	0.508745	0.508745	0.508745	1.51662	1.22342	1.22342	1.22342	1.45209	1.22342e-06	1.45209	0.474935	0.634833	1	1.22342e-06	1.45209	0.474935	0.634833	1	1.97898	2.70613	0.984755	72	168	1.97898	contigs_merge_contig_10787	0	4971	2.70613	0.984755	1.97898	2.81571	3.92956	1.4935	87	220	2.81571	contigs_merge_contig_10787	0	4971	3.92956	1.4935	2.81571
contigs_merge_contig_10788	0	0	0	1	#NUM!	0	#NUM!	#NUM!	0	0	0	1	0	1	0	1	1	0	1	0	1	1	0	0	#DIV/0!	0	0	0	contigs_merge_contig_10788	0	514	0	#DIV/0!	0	0	0	#DIV/0!	0	0	0	contigs_merge_contig_10788	0	514	0	#DIV/0!	0
contigs_merge_contig_10789	0.192944	0.192944	0.192944	2.17302	1.1197	1.1197	1.1197	0.570003	0.273898	0.273898	0.273898	2.21774	2.73898e-07	2.21774	0.321956	0.747486	1	2.73898e-07	2.21774	0.321956	0.747486	1	0.164485	0.224923	-2.60398	2	2	0.164485	contigs_merge_contig_10789	0	712	0.224923	-2.60398	0.164485	0.357429	0.498821	-1.48427	4	4	0.357429	contigs_merge_contig_10789	0	712	0.498821	-1.48427	0.357429
contigs_merge_contig_1079	0	0	0	1	#NUM!	0	#NUM!	#NUM!	0	0	0	1	0	1	0	1	1	0	1	0	1	1	0	0	#DIV/0!	0	0	0	contigs_merge_contig_1079	0	1186	0	#DIV/0!	0	0	0	#DIV/0!	0	0	0	contigs_merge_contig_1079	0	1186	0	#DIV/0!	0
contigs_merge_contig_10790	0	0	0	1	#NUM!	0	#NUM!	#NUM!	0	0	0	1	0	1	0	1	1	0	1	0	1	1	0	0	#DIV/0!	0	0	0	contigs_merge_contig_10790	0	608	0	#DIV/0!	0	0	0	#DIV/0!	0	0	0	contigs_merge_contig_10790	0	608	0	#DIV/0!	0
contigs_merge_contig_10791	0	0	0	1	#NUM!	0	#NUM!	#NUM!	0	0	0	1	0	1	0	1	1	0	1	0	1	1	0	0	#DIV/0!	0	0	0	contigs_merge_contig_10791	0	1080	0	#DIV/0!	0	0	0	#DIV/0!	0	0	0	contigs_merge_contig_10791	0	1080	0	#DIV/0!	0
contigs_merge_contig_10792	0	0	0	1	#NUM!	0	#NUM!	#NUM!	0	0	0	1	0	1	0	1	1	0	1	0	1	1	0	0	#DIV/0!	0	0	0	contigs_merge_contig_10792	0	517	0	#DIV/0!	0	0	0	#DIV/0!	0	0	0	contigs_merge_contig_10792	0	517	0	#DIV/0!	0
contigs_merge_contig_10793	0.835083	0.835083	0.835083	6.51906	2.70467	2.70467	2.70467	0.00725531	1.16968	1.16968	1.16968	6.65322	1.16968e-06	6.65322	0.929524	0.352618	1	1.16968e-06	6.65322	0.929524	0.352618	1	0.151309	0.206906	-2.72443	1	1	0.151309	contigs_merge_contig_10793	0	387	0.206906	-2.72443	0.151309	0.986392	1.37659	-0.0197666	6	6	0.986392	contigs_merge_contig_10793	0	387	1.37659	-0.0197666	0.986392
contigs_merge_contig_10794	0.124854	0.124854	-0.124854	#DIV/0!	#DIV/0!	0	#DIV/0!	0	0.17073	0.17073	-0.17073	#DIV/0!	-1.7073e-07	#DIV/0!	-0.413195	0.679463	1	-1.7073e-07	#DIV/0!	-0.413195	0.679464	1	0.124854	0.17073	-3.00169	1	1	0.124854	contigs_merge_contig_10794	0	469	0.17073	-3.00169	0.124854	0	0	#DIV/0!	0	0	0	contigs_merge_contig_10794	0	469	0	#DIV/0!	0
contigs_merge_contig_10795	2.16404	2.16404	2.16404	1.19688	0.259277	0.259277	0.259277	1.07497	3.32942	3.32942	3.32942	1.22151	3.32942e-06	1.22151	0.576182	0.564492	1	3.32942e-06	1.22151	0.576182	0.564492	1	10.9918	15.0306	3.45835	440	443	10.9918	contigs_merge_contig_10795	0	2360	15.0306	3.45835	10.9918	13.1558	18.36	3.71763	486	488	13.1558	contigs_merge_contig_10795	0	2360	18.36	3.71763	13.1558
contigs_merge_contig_10796	0	0	0	1	#NUM!	0	#NUM!	#NUM!	0	0	0	1	0	1	0	1	1	0	1	0	1	1	0	0	#DIV/0!	0	0	0	contigs_merge_contig_10796	0	1926	0	#DIV/0!	0	0	0	#DIV/0!	0	0	0	contigs_merge_contig_10796	0	1926	0	#DIV/0!	0
contigs_merge_contig_10797	2.40224	2.40224	-2.40224	-1.4317	0.517727	0.517727	-0.517727	-1.20907	3.12833	3.12833	-3.12833	-1.40283	-3.12833e-06	-1.40283	-0.724198	0.468944	1	-3.12833e-06	-1.40283	-0.724198	0.468944	1	7.96687	10.8942	2.99401	140	140	7.96687	contigs_merge_contig_10797	0	1029	10.8942	2.99401	7.96687	5.56463	7.7659	2.47629	90	90	5.56463	contigs_merge_contig_10797	0	1029	7.7659	2.47629	5.56463
contigs_merge_contig_10798	0.292722	0.292722	0.292722	3.25953	1.70467	1.70467	1.70467	0.421838	0.412163	0.412163	0.412163	3.32661	4.12163e-07	3.32661	0.470785	0.637794	1	4.12163e-07	3.32661	0.470785	0.637794	1	0.12955	0.177152	-2.94842	1	1	0.12955	contigs_merge_contig_10798	0	452	0.177152	-2.94842	0.12955	0.422272	0.589315	-1.24376	3	3	0.422272	contigs_merge_contig_10798	0	452	0.589315	-1.24376	0.422272
contigs_merge_contig_10799	0	0	0	1	#NUM!	0	#NUM!	#NUM!	0	0	0	1	0	1	0	1	1	0	1	0	1	1	0	0	#DIV/0!	0	0	0	contigs_merge_contig_10799	0	225	0	#DIV/0!	0	0	0	#DIV/0!	0	0	0	contigs_merge_contig_10799	0	225	0	#DIV/0!	0
contigs_merge_contig_108	6.69747	6.69747	6.69747	1.72396	0.785726	0.785726	0.785726	1.2448	9.6072	9.6072	9.6072	1.75944	9.6072e-06	1.75944	1.62607	0.103936	1	9.6072e-06	1.75944	1.62607	0.103936	1	9.25117	12.6504	3.20964	990	992	9.25117	contigs_merge_contig_108	0	6279	12.6504	3.20964	9.25117	15.9486	22.2576	3.99536	1571	1574	15.9486	contigs_merge_contig_108	0	6279	22.2576	3.99536	15.9486
contigs_merge_contig_1080	0.343742	0.343742	0.343742	4.34604	2.1197	2.1197	2.1197	0.354352	0.48261	0.48261	0.48261	4.43548	4.8261e-07	4.43548	0.552298	0.580744	1	4.8261e-07	4.43548	0.552298	0.580745	1	0.102731	0.140478	-3.28306	1	1	0.102731	contigs_merge_contig_1080	0	570	0.140478	-3.28306	0.102731	0.446472	0.623088	-1.16336	4	4	0.446472	contigs_merge_contig_1080	0	570	0.623088	-1.16336	0.446472
contigs_merge_contig_10800	0	0	0	1	#NUM!	0	#NUM!	#NUM!	0	0	0	1	0	1	0	1	1	0	1	0	1	1	0	0	#DIV/0!	0	0	0	contigs_merge_contig_10800	0	268	0	#DIV/0!	0	0	0	#DIV/0!	0	0	0	contigs_merge_contig_10800	0	268	0	#DIV/0!	0
contigs_merge_contig_10801	0	0	0	1	#NUM!	0	#NUM!	#NUM!	0	0	0	1	0	1	0	1	1	0	1	0	1	1	0	0	#DIV/0!	0	0	0	contigs_merge_contig_10801	0	1985	0	#DIV/0!	0	0	0	#DIV/0!	0	0	0	contigs_merge_contig_10801	0	1985	0	#DIV/0!	0
contigs_merge_contig_10802	0.126919	0.126919	-0.126919	-1.53396	0.617263	0.617263	-0.617263	-0.702213	0.166865	0.166865	-0.166865	-1.50303	-1.66865e-07	-1.50303	-0.183125	0.8547	1	-1.66865e-07	-1.50303	-0.183125	0.8547	1	0.364611	0.498584	-1.45557	5	5	0.364611	contigs_merge_contig_10802	0	803	0.498584	-1.45557	0.364611	0.237692	0.331719	-2.07283	3	3	0.237692	contigs_merge_contig_10802	0	803	0.331719	-2.07283	0.237692
contigs_merge_contig_10803	0.124587	0.124587	0.124587	#DIV/0!	#DIV/0!	0	#DIV/0!	0	0.173871	0.173871	0.173871	#DIV/0!	1.73871e-07	#DIV/0!	0.416978	0.676694	1	1.73871e-07	#DIV/0!	0.416978	0.676694	1	0	0	#DIV/0!	0	0	0	contigs_merge_contig_10803	0	4596	0	#DIV/0!	0	0.124587	0.173871	-3.00478	9	9	0.124587	contigs_merge_contig_10803	0	4596	0.173871	-3.00478	0.124587
contigs_merge_contig_10804	0.771656	0.771656	0.771656	1.32053	0.401115	0.401115	0.401115	1.31646	1.14466	1.14466	1.14466	1.3477	1.14466e-06	1.3477	0.411739	0.680531	1	1.14466e-06	1.3477	0.411739	0.680531	1	2.40745	3.29204	1.2675	56	65	2.40745	contigs_merge_contig_10804	0	1581	3.29204	1.2675	2.40745	3.1791	4.4367	1.66862	68	79	3.1791	contigs_merge_contig_10804	0	1581	4.4367	1.66862	3.1791
contigs_merge_contig_10805	0.460752	0.460752	-0.460752	-1.38057	0.46526	0.46526	-0.46526	-2.68669	0.59598	0.59598	-0.59598	-1.35273	-5.9598e-07	-1.35273	-0.298917	0.765004	1	-5.9598e-07	-1.35273	-0.298917	0.765004	1	1.67145	2.28561	0.741102	30	30	1.67145	contigs_merge_contig_10805	0	1051	2.28561	0.741102	1.67145	1.2107	1.68963	0.275842	20	20	1.2107	contigs_merge_contig_10805	0	1051	1.68963	0.275842	1.2107
contigs_merge_contig_10806	0.444407	0.444407	0.444407	1.25225	0.324522	0.324522	0.324522	1.3972	0.669784	0.669784	0.669784	1.27802	6.69784e-07	1.27802	0.285909	0.774948	1	6.69784e-07	1.27802	0.285909	0.774948	1	1.76177	2.40912	0.817027	58	59	1.76177	contigs_merge_contig_10806	0	1961	2.40912	0.817027	1.76177	2.20618	3.0789	1.14155	68	68	2.20618	contigs_merge_contig_10806	0	1961	3.0789	1.14155	2.20618
contigs_merge_contig_10807	0.377648	0.377648	0.377648	1.47205	0.557824	0.557824	0.557824	-0.732983	0.549553	0.549553	0.549553	1.50234	5.49553e-07	1.50234	0.332147	0.739778	1	5.49553e-07	1.50234	0.332147	0.739778	1	0.800023	1.09398	-0.321886	14	31	0.800023	contigs_merge_contig_10807	0	2269	1.09398	-0.321886	0.800023	1.17767	1.64354	0.235937	26	42	1.17767	contigs_merge_contig_10807	0	2269	1.64354	0.235937	1.17767
contigs_merge_contig_10808	1.62612	1.62612	1.62612	2.08944	1.06312	1.06312	1.06312	2.8398	2.31139	2.31139	2.31139	2.13244	2.31139e-06	2.13244	0.914122	0.360653	1	2.31139e-06	2.13244	0.914122	0.360653	1	1.49262	2.04107	0.577844	13	13	1.49262	contigs_merge_contig_10808	0	510	2.04107	0.577844	1.49262	3.11874	4.35246	1.64096	25	25	3.11874	contigs_merge_contig_10808	0	510	4.35246	1.64096	3.11874
contigs_merge_contig_10809	0.148608	0.148608	0.148608	1.39694	0.482273	0.482273	0.482273	0.659752	0.217931	0.217931	0.217931	1.42569	2.17931e-07	1.42569	0.195564	0.844952	1	2.17931e-07	1.42569	0.195564	0.844952	1	0.374383	0.511946	-1.41741	49	49	0.374383	contigs_merge_contig_10809	0	7664	0.511946	-1.41741	0.374383	0.522991	0.729877	-0.935141	63	63	0.522991	contigs_merge_contig_10809	0	7664	0.729877	-0.935141	0.522991
contigs_merge_contig_1081	0.668291	0.668291	0.668291	1.91226	0.935278	0.935278	0.935278	-1.08318	0.95327	0.95327	0.95327	1.95161	9.5327e-07	1.95161	0.554381	0.579318	1	9.5327e-07	1.95161	0.554381	0.579318	1	0.732567	1.00174	-0.448967	59	75	0.732567	contigs_merge_contig_1081	0	5995	1.00174	-0.448967	0.732567	1.40086	1.95501	0.486311	92	132	1.40086	contigs_merge_contig_1081	0	5995	1.95501	0.486311	1.40086
contigs_merge_contig_10810	1.09561	1.09561	1.09561	2.48345	1.31235	1.31235	1.31235	-2.0015	1.54979	1.54979	1.54979	2.53456	1.54979e-06	2.53456	0.820278	0.412057	1	1.54979e-06	2.53456	0.820278	0.412058	1	0.738551	1.00992	-0.437231	7	7	0.738551	contigs_merge_contig_10810	0	555	1.00992	-0.437231	0.738551	1.83416	2.55971	0.875117	16	16	1.83416	contigs_merge_contig_10810	0	555	2.55971	0.875117	1.83416
contigs_merge_contig_10811	3.46905	3.46905	3.46905	7.60558	2.92706	2.92706	2.92706	-2.15028	4.85613	4.85613	4.85613	7.76209	4.85613e-06	7.76209	1.9359	0.0528803	1	4.85613e-06	7.76209	1.9359	0.0528803	1	0.525171	0.71814	-0.929142	2	2	0.525171	contigs_merge_contig_10811	0	223	0.71814	-0.929142	0.525171	3.99423	5.57427	1.99792	12	14	3.99423	contigs_merge_contig_10811	0	223	5.57427	1.99792	3.99423
contigs_merge_contig_10812	1.77608	1.77608	1.77608	1.81085	0.856668	0.856668	0.856668	1.75732	2.54031	2.54031	2.54031	1.84812	2.54031e-06	1.84812	0.869748	0.384438	1	2.54031e-06	1.84812	0.869748	0.384438	1	2.19039	2.99523	1.13119	15	15	2.19039	contigs_merge_contig_10812	0	401	2.99523	1.13119	2.19039	3.96648	5.53554	1.98786	25	25	3.96648	contigs_merge_contig_10812	0	401	5.53554	1.98786	3.96648
contigs_merge_contig_10813	10.869	10.869	10.869	2.20161	1.13856	1.13856	1.13856	1.35836	15.4231	15.4231	15.4231	2.24692	1.54231e-05	2.24692	2.43374	0.0149438	1	1.54231e-05	2.24692	2.43374	0.0149438	1	9.04532	12.3689	3.17717	38	38	9.04532	contigs_merge_contig_10813	0	246	12.3689	3.17717	9.04532	19.9143	27.792	4.31573	77	77	19.9143	contigs_merge_contig_10813	0	246	27.792	4.31573	19.9143
contigs_merge_contig_10814	0.216705	0.216705	0.216705	1.37625	0.460739	0.460739	0.460739	0.421141	0.318638	0.318638	0.318638	1.40457	3.18638e-07	1.40457	0.231541	0.816895	1	3.18638e-07	1.40457	0.231541	0.816895	1	0.575966	0.787599	-0.795945	0	15	0.575966	contigs_merge_contig_10814	0	1525	0.787599	-0.795945	0.575966	0.792671	1.10624	-0.335205	1	19	0.792671	contigs_merge_contig_10814	0	1525	1.10624	-0.335205	0.792671
contigs_merge_contig_10815	0.196365	0.196365	0.196365	#DIV/0!	#DIV/0!	0	#DIV/0!	0	0.274044	0.274044	0.274044	#DIV/0!	2.74044e-07	#DIV/0!	0.523492	0.600632	1	2.74044e-07	#DIV/0!	0.523492	0.600632	1	0	0	#DIV/0!	0	0	0	contigs_merge_contig_10815	0	324	0	#DIV/0!	0	0.196365	0.274044	-2.34839	1	1	0.196365	contigs_merge_contig_10815	0	324	0.274044	-2.34839	0.196365
contigs_merge_contig_10816	0.259608	0.259608	0.259608	1.43575	0.521801	0.521801	0.521801	0.301613	0.37907	0.37907	0.37907	1.46529	3.7907e-07	1.46529	0.267479	0.789101	1	3.7907e-07	1.46529	0.267479	0.789101	1	0.595779	0.814692	-0.747152	27	28	0.595779	contigs_merge_contig_10816	0	2752	0.814692	-0.747152	0.595779	0.855387	1.19376	-0.225351	34	37	0.855387	contigs_merge_contig_10816	0	2752	1.19376	-0.225351	0.855387
contigs_merge_contig_10817	0	0	0	1	#NUM!	0	#NUM!	#NUM!	0	0	0	1	0	1	0	1	1	0	1	0	1	1	0	0	#DIV/0!	0	0	0	contigs_merge_contig_10817	0	281	0	#DIV/0!	0	0	0	#DIV/0!	0	0	0	contigs_merge_contig_10817	0	281	0	#DIV/0!	0
contigs_merge_contig_10818	0.509928	0.509928	0.509928	1.4237	0.509649	0.509649	0.509649	2.90711	0.745513	0.745513	0.745513	1.453	7.45513e-07	1.453	0.371048	0.710602	1	7.45513e-07	1.453	0.371048	0.710602	1	1.2035	1.64572	0.267237	28	29	1.2035	contigs_merge_contig_10818	0	1411	1.64572	0.267237	1.2035	1.71343	2.39123	0.776886	35	38	1.71343	contigs_merge_contig_10818	0	1411	2.39123	0.776886	1.71343
contigs_merge_contig_10819	0.422062	0.422062	0.422062	1.39694	0.482273	0.482273	0.482273	6.44781	0.618944	0.618944	0.618944	1.42569	6.18944e-07	1.42569	0.329576	0.74172	1	6.18944e-07	1.42569	0.329576	0.74172	1	1.06328	1.45398	0.088526	0	28	1.06328	contigs_merge_contig_10819	0	1542	1.45398	0.088526	1.06328	1.48535	2.07292	0.570799	0	36	1.48535	contigs_merge_contig_10819	0	1542	2.07292	0.570799	1.48535
contigs_merge_contig_1082	0.0827001	0.0827001	-0.0827001	-1.4317	0.517727	0.517727	-0.517727	-0.782838	0.107697	0.107697	-0.107697	-1.40283	-1.07697e-07	-1.40283	-0.134369	0.893111	1	-1.07697e-07	-1.40283	-0.134369	0.893111	1	0.274269	0.375047	-1.86633	2	14	0.274269	contigs_merge_contig_1082	0	2989	0.375047	-1.86633	0.274269	0.191569	0.267351	-2.38406	2	9	0.191569	contigs_merge_contig_1082	0	2989	0.267351	-2.38406	0.191569
contigs_merge_contig_10820	0.356763	0.356763	-0.356763	-2.30094	1.20223	1.20223	-1.20223	-0.3559	0.480135	0.480135	-0.480135	-2.25455	-4.80135e-07	-2.25455	-0.430209	0.667043	1	-4.80135e-07	-2.25455	-0.430209	0.667043	1	0.630997	0.862851	-0.664295	5	5	0.630997	contigs_merge_contig_10820	0	464	0.862851	-0.664295	0.630997	0.274234	0.382716	-1.86652	1	2	0.274234	contigs_merge_contig_10820	0	464	0.382716	-1.86652	0.274234
contigs_merge_contig_10821	0	0	0	1	#NUM!	0	#NUM!	#NUM!	0	0	0	1	0	1	0	1	1	0	1	0	1	1	0	0	#DIV/0!	0	0	0	contigs_merge_contig_10821	0	473	0	#DIV/0!	0	0	0	#DIV/0!	0	0	0	contigs_merge_contig_10821	0	473	0	#DIV/0!	0
contigs_merge_contig_10822	0.090889	0.090889	0.090889	#DIV/0!	#DIV/0!	0	#DIV/0!	0	0.126843	0.126843	0.126843	#DIV/0!	1.26843e-07	#DIV/0!	0.35615	0.721728	1	1.26843e-07	#DIV/0!	0.35615	0.721728	1	0	0	#DIV/0!	0	0	0	contigs_merge_contig_10822	0	1400	0	#DIV/0!	0	0.090889	0.126843	-3.45975	2	2	0.090889	contigs_merge_contig_10822	0	1400	0.126843	-3.45975	0.090889
contigs_merge_contig_10823	1.39495	1.39495	1.39495	1.34956	0.43249	0.43249	0.43249	1.21661	2.05907	2.05907	2.05907	1.37733	2.05907e-06	1.37733	0.571682	0.567538	1	2.05907e-06	1.37733	0.571682	0.567538	1	3.99058	5.45688	1.9966	95	95	3.99058	contigs_merge_contig_10823	0	1394	5.45688	1.9966	3.99058	5.38553	7.51595	2.42909	118	118	5.38553	contigs_merge_contig_10823	0	1394	7.51595	2.42909	5.38553
contigs_merge_contig_10824	4.17036	4.17036	4.17036	1.92	0.941105	0.941105	0.941105	1.43161	5.94764	5.94764	5.94764	1.95951	5.94764e-06	1.95951	1.38864	0.164943	1	5.94764e-06	1.95951	1.38864	0.164943	1	4.53301	6.19862	2.18047	73	73	4.53301	contigs_merge_contig_10824	0	943	6.19862	2.18047	4.53301	8.70337	12.1463	3.12157	129	129	8.70337	contigs_merge_contig_10824	0	943	12.1463	3.12157	8.70337
contigs_merge_contig_10825	0.299694	0.299694	0.299694	1.44868	0.53474	0.53474	0.53474	0.0815157	0.437045	0.437045	0.437045	1.47849	4.37045e-07	1.47849	0.290474	0.771454	1	4.37045e-07	1.47849	0.290474	0.771454	1	0.667945	0.913375	-0.582198	3	3	0.667945	contigs_merge_contig_10825	0	263	0.913375	-0.582198	0.667945	0.96764	1.35042	-0.0474583	4	4	0.96764	contigs_merge_contig_10825	0	263	1.35042	-0.0474583	0.96764
contigs_merge_contig_10826	0.179499	0.179499	-0.179499	-1.84075	0.880297	0.880297	-0.880297	-0.604842	0.239446	0.239446	-0.239446	-1.80364	-2.39446e-07	-1.80364	-0.261983	0.793334	1	-2.39446e-07	-1.80364	-0.261983	0.793334	1	0.392997	0.5374	-1.34741	4	4	0.392997	contigs_merge_contig_10826	0	596	0.5374	-1.34741	0.392997	0.213498	0.297953	-2.22771	2	2	0.213498	contigs_merge_contig_10826	0	596	0.297953	-2.22771	0.213498
contigs_merge_contig_10827	0.0764124	0.0764124	0.0764124	1.09914	0.136381	0.136381	0.136381	0.637021	0.128328	0.128328	0.128328	1.12176	1.28328e-07	1.12176	0.085817	0.931612	1	1.28328e-07	1.12176	0.085817	0.931612	1	0.770716	1.05391	-0.375728	82	86	0.770716	contigs_merge_contig_10827	0	6534	1.05391	-0.375728	0.770716	0.847129	1.18224	-0.239347	85	87	0.847129	contigs_merge_contig_10827	0	6534	1.18224	-0.239347	0.847129
contigs_merge_contig_10828	0.0118972	0.0118972	-0.0118972	-1.22717	0.295335	0.295335	-0.295335	-0.930592	0.0147949	0.0147949	-0.0147949	-1.20242	-1.47949e-08	-1.20242	-0.0368754	0.970584	1	-1.47949e-08	-1.20242	-0.0368754	0.970584	1	0.0642684	0.0878832	-3.95975	8	8	0.0642684	contigs_merge_contig_10828	0	7289	0.0878832	-3.95975	0.0642684	0.0523712	0.0730883	-4.25508	6	6	0.0523712	contigs_merge_contig_10828	0	7289	0.0730883	-4.25508	0.0523712
contigs_merge_contig_10829	0.0250775	0.0250775	-0.0250775	-1.10445	0.143332	0.143332	-0.143332	-0.930367	0.0275358	0.0275358	-0.0275358	-1.08218	-2.75358e-08	-1.08218	-0.0329669	0.973701	1	-2.75358e-08	-1.08218	-0.0329669	0.973701	1	0.265162	0.362593	-1.91506	12	12	0.265162	contigs_merge_contig_10829	0	2650	0.362593	-1.91506	0.265162	0.240084	0.335057	-2.05839	10	10	0.240084	contigs_merge_contig_10829	0	2650	0.335057	-2.05839	0.240084
contigs_merge_contig_1083	3.90585	3.90585	3.90585	1.64412	0.717312	0.717312	0.717312	1.27586	5.62157	5.62157	5.62157	1.67795	5.62157e-06	1.67795	1.19297	0.232882	1	5.62157e-06	1.67795	1.19297	0.232882	1	6.06388	8.292	2.60024	263	265	6.06388	contigs_merge_contig_1083	0	2559	8.292	2.60024	6.06388	9.96973	13.9136	3.31755	401	401	9.96973	contigs_merge_contig_1083	0	2559	13.9136	3.31755	9.96973
contigs_merge_contig_10830	0.118257	0.118257	0.118257	#DIV/0!	#DIV/0!	0	#DIV/0!	0	0.165037	0.165037	0.165037	#DIV/0!	1.65037e-07	#DIV/0!	0.406248	0.68456	1	1.65037e-07	#DIV/0!	0.406248	0.684561	1	0	0	#DIV/0!	0	0	0	contigs_merge_contig_10830	0	1076	0	#DIV/0!	0	0.118257	0.165037	-3.08	2	2	0.118257	contigs_merge_contig_10830	0	1076	0.165037	-3.08	0.118257
contigs_merge_contig_10831	0.189071	0.189071	0.189071	#DIV/0!	#DIV/0!	0	#DIV/0!	0	0.263864	0.263864	0.263864	#DIV/0!	2.63864e-07	#DIV/0!	0.513677	0.607478	1	2.63864e-07	#DIV/0!	0.513677	0.607478	1	0	0	#DIV/0!	0	0	0	contigs_merge_contig_10831	0	673	0	#DIV/0!	0	0.189071	0.263864	-2.403	2	2	0.189071	contigs_merge_contig_10831	0	673	0.263864	-2.403	0.189071
contigs_merge_contig_10832	11.2516	11.2516	11.2516	5.94186	2.57091	2.57091	2.57091	3.16587	15.7666	15.7666	15.7666	6.06414	1.57666e-05	6.06414	3.36198	0.000773857	0.09794	1.57666e-05	6.06414	3.36199	0.000773852	0.0979394	2.2768	3.11339	1.18701	32	32	2.2768	contigs_merge_contig_10832	0	823	3.11339	1.18701	2.2768	13.5284	18.88	3.75792	175	175	13.5284	contigs_merge_contig_10832	0	823	18.88	3.75792	13.5284
contigs_merge_contig_10833	0.589354	0.589354	-0.589354	-6.74943	2.75477	2.75477	-2.75477	-0.16172	0.803022	0.803022	-0.803022	-6.61334	-8.03022e-07	-6.61334	-0.769461	0.44162	1	-8.03022e-07	-6.61334	-0.769461	0.44162	1	0.69186	0.946078	-0.531448	5	22	0.69186	contigs_merge_contig_10833	0	1862	0.946078	-0.531448	0.69186	0.102506	0.143056	-3.28621	0	3	0.102506	contigs_merge_contig_10833	0	1862	0.143056	-3.28621	0.102506
contigs_merge_contig_10834	19.4221	19.4221	19.4221	1.68642	0.753968	0.753968	0.753968	1.15635	27.9014	27.9014	27.9014	1.72113	2.79014e-05	1.72113	2.7193	0.0065421	0.579167	2.79014e-05	1.72113	2.7193	0.00654206	0.579164	28.2946	38.6912	4.82246	489	489	28.2946	contigs_merge_contig_10834	0	1012	38.6912	4.82246	28.2946	47.7167	66.5926	5.57642	759	759	47.7167	contigs_merge_contig_10834	0	1012	66.5926	5.57642	47.7167
contigs_merge_contig_10835	0.101205	0.101205	-0.101205	-1.44631	0.532374	0.532374	-0.532374	-0.751316	0.13201	0.13201	-0.13201	-1.41714	-1.3201e-07	-1.41714	-0.150937	0.880026	1	-1.3201e-07	-1.41714	-0.150937	0.880026	1	0.327964	0.448472	-1.60839	11	11	0.327964	contigs_merge_contig_10835	0	1964	0.448472	-1.60839	0.327964	0.22676	0.316462	-2.14076	7	7	0.22676	contigs_merge_contig_10835	0	1964	0.316462	-2.14076	0.22676
contigs_merge_contig_10836	0.00854262	0.00854262	0.00854262	1.08651	0.119703	0.119703	0.119703	0.964162	0.0147007	0.0147007	0.0147007	1.10887	1.47007e-08	1.10887	0.0275486	0.978022	1	1.47007e-08	1.10887	0.0275486	0.978022	1	0.0987463	0.13503	-3.34013	0	2	0.0987463	contigs_merge_contig_10836	0	1186	0.13503	-3.34013	0.0987463	0.107289	0.14973	-3.22043	0	2	0.107289	contigs_merge_contig_10836	0	1186	0.14973	-3.22043	0.107289
contigs_merge_contig_10837	0.351991	0.351991	0.351991	#DIV/0!	#DIV/0!	0	#DIV/0!	0	0.491232	0.491232	0.491232	#DIV/0!	4.91232e-07	#DIV/0!	0.700879	0.483378	1	4.91232e-07	#DIV/0!	0.700879	0.483378	1	0	0	#DIV/0!	0	0	0	contigs_merge_contig_10837	0	1446	0	#DIV/0!	0	0.351991	0.491232	-1.50639	8	8	0.351991	contigs_merge_contig_10837	0	1446	0.491232	-1.50639	0.351991
contigs_merge_contig_10838	0.531451	0.531451	0.531451	#DIV/0!	#DIV/0!	0	#DIV/0!	0	0.741683	0.741683	0.741683	#DIV/0!	7.41683e-07	#DIV/0!	0.861211	0.389122	1	7.41683e-07	#DIV/0!	0.861211	0.389122	1	0	0	#DIV/0!	0	0	0	contigs_merge_contig_10838	0	838	0	#DIV/0!	0	0.531451	0.741683	-0.911991	7	7	0.531451	contigs_merge_contig_10838	0	838	0.741683	-0.911991	0.531451
contigs_merge_contig_10839	0	0	0	1	#NUM!	0	#NUM!	#NUM!	0	0	0	1	0	1	0	1	1	0	1	0	1	1	0	0	#DIV/0!	0	0	0	contigs_merge_contig_10839	0	502	0	#DIV/0!	0	0	0	#DIV/0!	0	0	0	contigs_merge_contig_10839	0	502	0	#DIV/0!	0
contigs_merge_contig_1084	0.686921	0.686921	0.686921	1.36995	0.454122	0.454122	0.454122	1.50864	1.01091	1.01091	1.01091	1.39814	1.01091e-06	1.39814	0.409673	0.682046	1	1.01091e-06	1.39814	0.409673	0.682046	1	1.8568	2.53907	0.89282	67	69	1.8568	contigs_merge_contig_1084	0	2176	2.53907	0.89282	1.8568	2.54372	3.54997	1.34694	82	87	2.54372	contigs_merge_contig_1084	0	2176	3.54997	1.34694	2.54372
contigs_merge_contig_10840	0.0923401	0.0923401	0.0923401	#DIV/0!	#DIV/0!	0	#DIV/0!	0	0.128868	0.128868	0.128868	#DIV/0!	1.28868e-07	#DIV/0!	0.358982	0.719609	1	1.28868e-07	#DIV/0!	0.358982	0.719609	1	0	0	#DIV/0!	0	0	0	contigs_merge_contig_10840	0	1378	0	#DIV/0!	0	0.0923401	0.128868	-3.4369	2	2	0.0923401	contigs_merge_contig_10840	0	1378	0.128868	-3.4369	0.0923401
contigs_merge_contig_10841	0.0923444	0.0923444	0.0923444	1.90139	0.927057	0.927057	0.927057	0.717968	0.131757	0.131757	0.131757	1.94052	1.31757e-07	1.94052	0.205286	0.837349	1	1.31757e-07	1.94052	0.205286	0.837349	1	0.102446	0.140089	-3.28706	12	12	0.102446	contigs_merge_contig_10841	0	6859	0.140089	-3.28706	0.102446	0.194791	0.271846	-2.36	21	21	0.194791	contigs_merge_contig_10841	0	6859	0.271846	-2.36	0.194791
contigs_merge_contig_10842	0.122323	0.122323	0.122323	1.90139	0.927057	0.927057	0.927057	0.678268	0.174531	0.174531	0.174531	1.94052	1.74531e-07	1.94052	0.23627	0.813223	1	1.74531e-07	1.94052	0.23627	0.813223	1	0.135705	0.185568	-2.88146	4	4	0.135705	contigs_merge_contig_10842	0	1726	0.185568	-2.88146	0.135705	0.258028	0.360099	-1.9544	6	7	0.258028	contigs_merge_contig_10842	0	1726	0.360099	-1.9544	0.258028
contigs_merge_contig_10843	0.0339009	0.0339009	-0.0339009	-1.22717	0.295335	0.295335	-0.295335	-0.892385	0.0421579	0.0421579	-0.0421579	-1.20242	-4.21579e-08	-1.20242	-0.0622474	0.950366	1	-4.21579e-08	-1.20242	-0.0622474	0.950366	1	0.183132	0.250422	-2.44904	4	4	0.183132	contigs_merge_contig_10843	0	1279	0.250422	-2.44904	0.183132	0.149231	0.208265	-2.74438	2	3	0.149231	contigs_merge_contig_10843	0	1279	0.208265	-2.74438	0.149231
contigs_merge_contig_10844	0.0614033	0.0614033	0.0614033	1.08651	0.119703	0.119703	0.119703	0.757964	0.105667	0.105667	0.105667	1.10887	1.05667e-07	1.10887	0.0738584	0.941123	1	1.05667e-07	1.10887	0.0738584	0.941123	1	0.709776	0.970577	-0.494564	4	4	0.709776	contigs_merge_contig_10844	0	330	0.970577	-0.494564	0.709776	0.771179	1.07624	-0.374862	4	4	0.771179	contigs_merge_contig_10844	0	330	1.07624	-0.374862	0.771179
contigs_merge_contig_10845	0.200167	0.200167	0.200167	1.24173	0.312348	0.312348	0.312348	-0.147612	0.302652	0.302652	0.302652	1.26728	3.02652e-07	1.26728	0.188888	0.850181	1	3.02652e-07	1.26728	0.188888	0.850181	1	0.828072	1.13234	-0.272172	7	7	0.828072	contigs_merge_contig_10845	0	495	1.13234	-0.272172	0.828072	1.02824	1.43499	0.0401759	8	8	1.02824	contigs_merge_contig_10845	0	495	1.43499	0.0401759	1.02824
contigs_merge_contig_10846	0.0615614	0.0615614	0.0615614	1.07258	0.101087	0.101087	0.101087	0.574497	0.109782	0.109782	0.109782	1.09465	1.09782e-07	1.09465	0.0704336	0.943849	1	1.09782e-07	1.09465	0.0704336	0.943849	1	0.848173	1.15983	-0.23757	78	78	0.848173	contigs_merge_contig_10846	0	5385	1.15983	-0.23757	0.848173	0.909734	1.26961	-0.136483	77	77	0.909734	contigs_merge_contig_10846	0	5385	1.26961	-0.136483	0.909734
contigs_merge_contig_10847	0	0	0	1	#NUM!	0	#NUM!	#NUM!	0	0	0	1	0	1	0	1	1	0	1	0	1	1	0	0	#DIV/0!	0	0	0	contigs_merge_contig_10847	0	240	0	#DIV/0!	0	0	0	#DIV/0!	0	0	0	contigs_merge_contig_10847	0	240	0	#DIV/0!	0
contigs_merge_contig_10848	0.187124	0.187124	0.187124	#DIV/0!	#DIV/0!	0	#DIV/0!	0	0.261147	0.261147	0.261147	#DIV/0!	2.61147e-07	#DIV/0!	0.511026	0.609333	1	2.61147e-07	#DIV/0!	0.511026	0.609333	1	0	0	#DIV/0!	0	0	0	contigs_merge_contig_10848	0	340	0	#DIV/0!	0	0.187124	0.261147	-2.41793	1	1	0.187124	contigs_merge_contig_10848	0	340	0.261147	-2.41793	0.187124
contigs_merge_contig_10849	1.78292	1.78292	1.78292	10.8651	3.44163	3.44163	3.44163	-0.39445	2.4933	2.4933	2.4933	11.0887	2.4933e-06	11.0887	1.4425	0.149162	1	2.4933e-06	11.0887	1.4425	0.149162	1	0.18073	0.247138	-2.46809	14	14	0.18073	contigs_merge_contig_10849	0	4536	0.247138	-2.46809	0.18073	1.96365	2.74044	0.973539	140	140	1.96365	contigs_merge_contig_10849	0	4536	2.74044	0.973539	1.96365
contigs_merge_contig_1085	0.21057	0.21057	-0.21057	-1.53396	0.617263	0.617263	-0.617263	-0.540193	0.276844	0.276844	-0.276844	-1.50303	-2.76844e-07	-1.50303	-0.235875	0.81353	1	-2.76844e-07	-1.50303	-0.235875	0.81353	1	0.604923	0.827196	-0.725177	10	10	0.604923	contigs_merge_contig_1085	0	968	0.827196	-0.725177	0.604923	0.394353	0.550352	-1.34244	6	6	0.394353	contigs_merge_contig_1085	0	968	0.550352	-1.34244	0.394353
contigs_merge_contig_10850	0.640506	0.640506	0.640506	1.93157	0.949778	0.949778	0.949778	-0.757354	0.913227	0.913227	0.913227	1.97133	9.13227e-07	1.97133	0.546383	0.584803	1	9.13227e-07	1.97133	0.546383	0.584803	1	0.687552	0.940187	-0.540459	18	18	0.687552	contigs_merge_contig_10850	0	1533	0.940187	-0.540459	0.687552	1.32806	1.85341	0.409319	32	32	1.32806	contigs_merge_contig_10850	0	1533	1.85341	0.409319	1.32806
contigs_merge_contig_10851	0	0	0	1	#NUM!	0	#NUM!	#NUM!	0	0	0	1	0	1	0	1	1	0	1	0	1	1	0	0	#DIV/0!	0	0	0	contigs_merge_contig_10851	0	510	0	#DIV/0!	0	0	0	#DIV/0!	0	0	0	contigs_merge_contig_10851	0	510	0	#DIV/0!	0
contigs_merge_contig_10852	0.159	0.159	0.159	2.17302	1.1197	1.1197	1.1197	0.611636	0.225712	0.225712	0.225712	2.21774	2.25712e-07	2.21774	0.292267	0.770083	1	2.25712e-07	2.21774	0.292267	0.770083	1	0.135548	0.185353	-2.88313	1	2	0.135548	contigs_merge_contig_10852	0	864	0.185353	-2.88313	0.135548	0.294548	0.411065	-1.76343	2	4	0.294548	contigs_merge_contig_10852	0	864	0.411065	-1.76343	0.294548
contigs_merge_contig_10853	0.354236	0.354236	-0.354236	-1.67121	0.740894	0.740894	-0.740894	-0.196478	0.469544	0.469544	-0.469544	-1.63751	-4.69544e-07	-1.63751	-0.336888	0.736201	1	-4.69544e-07	-1.63751	-0.336888	0.736201	1	0.881991	1.20607	-0.181164	64	69	0.881991	contigs_merge_contig_10853	0	4581	1.20607	-0.181164	0.881991	0.527755	0.736526	-0.922059	35	38	0.527755	contigs_merge_contig_10853	0	4581	0.736526	-0.922059	0.527755
contigs_merge_contig_10854	2.15015	2.15015	2.15015	1.20074	0.263919	0.263919	0.263919	1.07715	3.30214	3.30214	3.30214	1.22545	3.30214e-06	1.22545	0.578382	0.563007	1	3.30214e-06	1.22545	0.578382	0.563007	1	10.7113	14.6471	3.42107	1189	1189	10.7113	contigs_merge_contig_10854	0	6500	14.6471	3.42107	10.7113	12.8615	17.9493	3.68499	1314	1314	12.8615	contigs_merge_contig_10854	0	6500	17.9493	3.68499	12.8615
contigs_merge_contig_10855	0.7872	0.7872	0.7872	2.71628	1.44163	1.44163	1.44163	-0.282042	1.11151	1.11151	1.11151	2.77218	1.11151e-06	2.77218	0.722627	0.469909	1	1.11151e-06	2.77218	0.722627	0.469909	1	0.458667	0.6272	-1.12448	6	6	0.458667	contigs_merge_contig_10855	0	766	0.6272	-1.12448	0.458667	1.24587	1.73871	0.317151	15	15	1.24587	contigs_merge_contig_10855	0	766	1.73871	0.317151	1.24587
contigs_merge_contig_10856	0.405229	0.405229	-0.405229	-1.31482	0.394871	0.394871	-0.394871	-2.08425	0.517904	0.517904	-0.517904	-1.28831	-5.17904e-07	-1.28831	-0.255446	0.798379	1	-5.17904e-07	-1.28831	-0.255446	0.798379	1	1.69239	2.31424	0.759058	10	10	1.69239	contigs_merge_contig_10856	0	346	2.31424	0.759058	1.69239	1.28716	1.79633	0.364187	7	7	1.28716	contigs_merge_contig_10856	0	346	1.79633	0.364187	1.28716
contigs_merge_contig_10857	0.0114808	0.0114808	-0.0114808	-1.01242	0.017801	0.017801	-0.017801	-0.842296	0.0103238	0.0103238	0.0103238	1.00806	1.03238e-08	1.00806	0.00643885	0.994863	1	1.03238e-08	1.00806	0.00643885	0.994863	1	0.936224	1.28023	-0.095075	11	11	0.936224	contigs_merge_contig_10857	0	688	1.28023	-0.095075	0.936224	0.924743	1.29055	-0.112876	10	10	0.924743	contigs_merge_contig_10857	0	688	1.29055	-0.112876	0.924743
contigs_merge_contig_10858	0.0399024	0.0399024	0.0399024	1.01	0.0143495	0.0143495	0.0143495	1.00719	0.168022	0.168022	0.168022	1.03078	1.68022e-07	1.03078	0.0504654	0.959752	1	1.68022e-07	1.03078	0.0504654	0.959752	1	3.99185	5.45862	1.99706	112	142	3.99185	contigs_merge_contig_10858	0	2083	5.45862	1.99706	3.99185	4.03175	5.62664	2.01141	107	132	4.03175	contigs_merge_contig_10858	0	2083	5.62664	2.01141	4.03175
contigs_merge_contig_10859	1.34557	1.34557	1.34557	5.13623	2.36071	2.36071	2.36071	-0.457143	1.88701	1.88701	1.88701	5.24193	1.88701e-06	5.24193	1.13243	0.257455	1	1.88701e-06	5.24193	1.13243	0.257455	1	0.325314	0.444848	-1.62009	11	11	0.325314	contigs_merge_contig_10859	0	1980	0.444848	-1.62009	0.325314	1.67089	2.33186	0.740616	52	52	1.67089	contigs_merge_contig_10859	0	1980	2.33186	0.740616	1.67089
contigs_merge_contig_1086	1.05182	1.05182	1.05182	1.83871	0.878694	0.878694	0.878694	3.69006	1.50319	1.50319	1.50319	1.87655	1.50319e-06	1.87655	0.6768	0.498533	1	1.50319e-06	1.87655	0.6768	0.498533	1	1.25409	1.7149	0.326645	13	13	1.25409	contigs_merge_contig_1086	0	607	1.7149	0.326645	1.25409	2.30592	3.21809	1.20534	22	22	2.30592	contigs_merge_contig_1086	0	607	3.21809	1.20534	2.30592
contigs_merge_contig_10860	0	0	0	1	#NUM!	0	#NUM!	#NUM!	0	0	0	1	0	1	0	1	1	0	1	0	1	1	0	0	#DIV/0!	0	0	0	contigs_merge_contig_10860	0	386	0	#DIV/0!	0	0	0	#DIV/0!	0	0	0	contigs_merge_contig_10860	0	386	0	#DIV/0!	0
contigs_merge_contig_10861	0	0	0	1	#NUM!	0	#NUM!	#NUM!	0	0	0	1	0	1	0	1	1	0	1	0	1	1	0	0	#DIV/0!	0	0	0	contigs_merge_contig_10861	0	648	0	#DIV/0!	0	0	0	#DIV/0!	0	0	0	contigs_merge_contig_10861	0	648	0	#DIV/0!	0
contigs_merge_contig_10862	6.9961	6.9961	6.9961	2.21767	1.14905	1.14905	1.14905	1.45553	9.92531	9.92531	9.92531	2.26331	9.92531e-06	2.26331	1.9602	0.0499723	1	9.92531e-06	2.26331	1.9602	0.0499722	1	5.74547	7.85658	2.52242	365	365	5.74547	contigs_merge_contig_10862	0	3720	7.85658	2.52242	5.74547	12.7416	17.7819	3.67147	745	745	12.7416	contigs_merge_contig_10862	0	3720	17.7819	3.67147	12.7416
contigs_merge_contig_10863	0	0	0	1	#NUM!	0	#NUM!	#NUM!	0	0	0	1	0	1	0	1	1	0	1	0	1	1	0	0	#DIV/0!	0	0	0	contigs_merge_contig_10863	0	2664	0	#DIV/0!	0	0	0	#DIV/0!	0	0	0	contigs_merge_contig_10863	0	2664	0	#DIV/0!	0
contigs_merge_contig_10864	0.630109	0.630109	0.630109	2.53519	1.34209	1.34209	1.34209	-0.0446381	0.890918	0.890918	0.890918	2.58736	8.90918e-07	2.58736	0.62787	0.530089	1	8.90918e-07	2.58736	0.62787	0.530089	1	0.410443	0.561256	-1.28475	6	6	0.410443	contigs_merge_contig_10864	0	856	0.561256	-1.28475	0.410443	1.04055	1.45217	0.0573486	14	14	1.04055	contigs_merge_contig_10864	0	856	1.45217	0.0573486	1.04055
contigs_merge_contig_10865	0.0628147	0.0628147	0.0628147	1.01907	0.0272563	0.0272563	0.0272563	1.01585	0.180346	0.180346	0.180346	1.04004	1.80346e-07	1.04004	0.0594981	0.952555	1	1.80346e-07	1.04004	0.0594981	0.952555	1	3.29352	4.50369	1.71963	145	145	3.29352	contigs_merge_contig_10865	0	2578	4.50369	1.71963	3.29352	3.35634	4.68404	1.74689	136	136	3.35634	contigs_merge_contig_10865	0	2578	4.68404	1.74689	3.35634
contigs_merge_contig_10866	0.0922062	0.0922062	0.0922062	#DIV/0!	#DIV/0!	0	#DIV/0!	0	0.128681	0.128681	0.128681	#DIV/0!	1.28681e-07	#DIV/0!	0.358722	0.719803	1	1.28681e-07	#DIV/0!	0.358722	0.719803	1	0	0	#DIV/0!	0	0	0	contigs_merge_contig_10866	0	690	0	#DIV/0!	0	0.0922062	0.128681	-3.43899	1	1	0.0922062	contigs_merge_contig_10866	0	690	0.128681	-3.43899	0.0922062
contigs_merge_contig_10867	0.162463	0.162463	0.162463	2.9879	1.57913	1.57913	1.57913	0.562938	0.22903	0.22903	0.22903	3.04939	2.2903e-07	3.04939	0.340459	0.733511	1	2.2903e-07	3.04939	0.340459	0.733511	1	0.0817258	0.111755	-3.61306	4	4	0.0817258	contigs_merge_contig_10867	0	2866	0.111755	-3.61306	0.0817258	0.244189	0.340785	-2.03393	11	11	0.244189	contigs_merge_contig_10867	0	2866	0.340785	-2.03393	0.244189
contigs_merge_contig_10868	0.0435869	0.0435869	0.0435869	1.81085	0.856668	0.856668	0.856668	0.796876	0.0623417	0.0623417	0.0623417	1.84812	6.23417e-08	1.84812	0.136251	0.891623	1	6.23417e-08	1.84812	0.136251	0.891623	1	0.0537545	0.073506	-4.21747	6	6	0.0537545	contigs_merge_contig_10868	0	6536	0.073506	-4.21747	0.0537545	0.0973413	0.135848	-3.3608	10	10	0.0973413	contigs_merge_contig_10868	0	6536	0.135848	-3.3608	0.0973413
contigs_merge_contig_10869	0.100926	0.100926	-0.100926	-1.84075	0.880297	0.880297	-0.880297	-0.712169	0.134632	0.134632	-0.134632	-1.80364	-1.34632e-07	-1.80364	-0.196446	0.844261	1	-1.34632e-07	-1.80364	-0.196446	0.844261	1	0.220968	0.302161	-2.17809	4	4	0.220968	contigs_merge_contig_10869	0	1060	0.302161	-2.17809	0.220968	0.120042	0.167529	-3.05839	2	2	0.120042	contigs_merge_contig_10869	0	1060	0.167529	-3.05839	0.120042
contigs_merge_contig_1087	0.197927	0.197927	0.197927	2.08248	1.0583	1.0583	1.0583	0.568268	0.281369	0.281369	0.281369	2.12534	2.81369e-07	2.12534	0.318296	0.750261	1	2.81369e-07	2.12534	0.318296	0.750261	1	0.182846	0.250031	-2.4513	12	12	0.182846	contigs_merge_contig_1087	0	3843	0.250031	-2.4513	0.182846	0.380774	0.531401	-1.39299	23	23	0.380774	contigs_merge_contig_1087	0	3843	0.531401	-1.39299	0.380774
contigs_merge_contig_10870	0.0740821	0.0740821	-0.0740821	-1.38057	0.46526	0.46526	-0.46526	-0.802935	0.0958248	0.0958248	-0.0958248	-1.35273	-9.58248e-08	-1.35273	-0.11986	0.904594	1	-9.58248e-08	-1.35273	-0.11986	0.904594	1	0.268745	0.367493	-1.89569	9	9	0.268745	contigs_merge_contig_10870	0	1961	0.367493	-1.89569	0.268745	0.194663	0.271668	-2.36095	6	6	0.194663	contigs_merge_contig_10870	0	1961	0.271668	-2.36095	0.194663
contigs_merge_contig_10871	0	0	0	1	#NUM!	0	#NUM!	#NUM!	0	0	0	1	0	1	0	1	1	0	1	0	1	1	0	0	#DIV/0!	0	0	0	contigs_merge_contig_10871	0	789	0	#DIV/0!	0	0	0	#DIV/0!	0	0	0	contigs_merge_contig_10871	0	789	0	#DIV/0!	0
contigs_merge_contig_10872	0	0	0	1	#NUM!	0	#NUM!	#NUM!	0	0	0	1	0	1	0	1	1	0	1	0	1	1	0	0	#DIV/0!	0	0	0	contigs_merge_contig_10872	0	337	0	#DIV/0!	0	0	0	#DIV/0!	0	0	0	contigs_merge_contig_10872	0	337	0	#DIV/0!	0
contigs_merge_contig_10873	0	0	0	1	#NUM!	0	#NUM!	#NUM!	0	0	0	1	0	1	0	1	1	0	1	0	1	1	0	0	#DIV/0!	0	0	0	contigs_merge_contig_10873	0	1581	0	#DIV/0!	0	0	0	#DIV/0!	0	0	0	contigs_merge_contig_10873	0	1581	0	#DIV/0!	0
contigs_merge_contig_10874	0.177298	0.177298	0.177298	1.13375	0.181103	0.181103	0.181103	1.44537	0.284738	0.284738	0.284738	1.15708	2.84738e-07	1.15708	0.143997	0.885503	1	2.84738e-07	1.15708	0.143997	0.885503	1	1.32559	1.81267	0.406635	15	23	1.32559	contigs_merge_contig_10874	0	1016	1.81267	0.406635	1.32559	1.50289	2.0974	0.587738	16	24	1.50289	contigs_merge_contig_10874	0	1016	2.0974	0.587738	1.50289
contigs_merge_contig_10875	0.0236167	0.0236167	0.0236167	1.08651	0.119703	0.119703	0.119703	0.936093	0.0406412	0.0406412	0.0406412	1.10887	4.06412e-08	1.10887	0.0458051	0.963466	1	4.06412e-08	1.10887	0.0458051	0.963466	1	0.272991	0.373299	-1.87308	2	2	0.272991	contigs_merge_contig_10875	0	429	0.373299	-1.87308	0.272991	0.296607	0.41394	-1.75337	2	2	0.296607	contigs_merge_contig_10875	0	429	0.41394	-1.75337	0.296607
contigs_merge_contig_10876	0	0	0	1	#NUM!	0	#NUM!	#NUM!	0	0	0	1	0	1	0	1	1	0	1	0	1	1	0	0	#DIV/0!	0	0	0	contigs_merge_contig_10876	0	220	0	#DIV/0!	0	0	0	#DIV/0!	0	0	0	contigs_merge_contig_10876	0	220	0	#DIV/0!	0
contigs_merge_contig_10877	8.73642	8.73642	8.73642	1.19208	0.253484	0.253484	0.253484	1.04603	13.4723	13.4723	13.4723	1.21661	1.34723e-05	1.21661	1.14745	0.251194	1	1.34723e-05	1.21661	1.14745	0.251194	1	45.4826	62.1947	5.50724	247	247	45.4826	contigs_merge_contig_10877	0	318	62.1947	5.50724	45.4826	54.219	75.667	5.76073	271	271	54.219	contigs_merge_contig_10877	0	318	75.667	5.76073	54.219
contigs_merge_contig_10878	527.63	527.63	-527.63	-1.30309	0.38194	0.38194	-0.38194	-1.03548	672.515	672.515	-672.515	-1.27682	-0.000672515	-1.27682	-9.05492	0	0	-0.000672515	-1.27682	-9.05511	1.36555e-19	8.72815e-17	2268.45	3101.97	11.1475	31809	34052	2268.45	contigs_merge_contig_10878	0	879	3101.97	11.1475	2268.45	1740.82	2429.45	10.7656	22540	24051	1740.82	contigs_merge_contig_10878	0	879	2429.45	10.7656	1740.82
contigs_merge_contig_10879	0	0	0	1	#NUM!	0	#NUM!	#NUM!	0	0	0	1	0	1	0	1	1	0	1	0	1	1	0	0	#DIV/0!	0	0	0	contigs_merge_contig_10879	0	511	0	#DIV/0!	0	0	0	#DIV/0!	0	0	0	contigs_merge_contig_10879	0	511	0	#DIV/0!	0
contigs_merge_contig_1088	0.0676217	0.0676217	-0.0676217	-2.30094	1.20223	1.20223	-1.20223	-0.71818	0.091006	0.091006	-0.091006	-2.25455	-9.1006e-08	-2.25455	-0.187298	0.851427	1	-9.1006e-08	-2.25455	-0.187298	0.851427	1	0.119601	0.163547	-3.0637	5	5	0.119601	contigs_merge_contig_1088	0	2448	0.163547	-3.0637	0.119601	0.051979	0.0725409	-4.26593	2	2	0.051979	contigs_merge_contig_1088	0	2448	0.0725409	-4.26593	0.051979
contigs_merge_contig_10880	0.510081	0.510081	0.510081	10.8651	3.44163	3.44163	3.44163	0.194665	0.713314	0.713314	0.713314	11.0887	7.13314e-07	11.0887	0.771558	0.440376	1	7.13314e-07	11.0887	0.771558	0.440377	1	0.0517055	0.0707043	-4.27354	0	2	0.0517055	contigs_merge_contig_10880	0	2265	0.0707043	-4.27354	0.0517055	0.561786	0.784019	-0.831907	2	20	0.561786	contigs_merge_contig_10880	0	2265	0.784019	-0.831907	0.561786
contigs_merge_contig_10881	0.160701	0.160701	0.160701	2.17302	1.1197	1.1197	1.1197	0.609558	0.228126	0.228126	0.228126	2.21774	2.28126e-07	2.21774	0.293826	0.768891	1	2.28126e-07	2.21774	0.293826	0.768891	1	0.136997	0.187336	-2.86778	14	14	0.136997	contigs_merge_contig_10881	0	5984	0.187336	-2.86778	0.136997	0.297698	0.415462	-1.74808	28	28	0.297698	contigs_merge_contig_10881	0	5984	0.415462	-1.74808	0.297698
contigs_merge_contig_10882	0.195761	0.195761	0.195761	#DIV/0!	#DIV/0!	0	#DIV/0!	0	0.2732	0.2732	0.2732	#DIV/0!	2.732e-07	#DIV/0!	0.522686	0.601193	1	2.732e-07	#DIV/0!	0.522686	0.601193	1	0	0	#DIV/0!	0	0	0	contigs_merge_contig_10882	0	325	0	#DIV/0!	0	0.195761	0.2732	-2.35284	1	1	0.195761	contigs_merge_contig_10882	0	325	0.2732	-2.35284	0.195761
contigs_merge_contig_10883	0.318426	0.318426	0.318426	1.68409	0.751971	0.751971	0.751971	0.318392	0.457489	0.457489	0.457489	1.71875	4.57489e-07	1.71875	0.347772	0.728011	1	4.57489e-07	1.71875	0.347772	0.728011	1	0.465473	0.636507	-1.10323	20	20	0.465473	contigs_merge_contig_10883	0	2516	0.636507	-1.10323	0.465473	0.7839	1.094	-0.351259	31	31	0.7839	contigs_merge_contig_10883	0	2516	1.094	-0.351259	0.7839
contigs_merge_contig_10884	0.132261	0.132261	-0.132261	-1.61066	0.687652	0.687652	-0.687652	-0.68842	0.174764	0.174764	-0.174764	-1.57818	-1.74764e-07	-1.57818	-0.197971	0.843068	1	-1.74764e-07	-1.57818	-0.197971	0.843068	1	0.348847	0.477028	-1.51933	7	7	0.348847	contigs_merge_contig_10884	0	1175	0.477028	-1.51933	0.348847	0.216587	0.302264	-2.20698	2	4	0.216587	contigs_merge_contig_10884	0	1175	0.302264	-2.20698	0.216587
contigs_merge_contig_10885	0.191154	0.191154	0.191154	1.90139	0.927057	0.927057	0.927057	0.585658	0.272739	0.272739	0.272739	1.94052	2.72739e-07	1.94052	0.295356	0.767722	1	2.72739e-07	1.94052	0.295356	0.767722	1	0.212065	0.289987	-2.23742	6	8	0.212065	contigs_merge_contig_10885	0	2209	0.289987	-2.23742	0.212065	0.40322	0.562726	-1.31036	12	14	0.40322	contigs_merge_contig_10885	0	2209	0.562726	-1.31036	0.40322
contigs_merge_contig_10886	0	0	0	1	#NUM!	0	#NUM!	#NUM!	0	0	0	1	0	1	0	1	1	0	1	0	1	1	0	0	#DIV/0!	0	0	0	contigs_merge_contig_10886	0	1152	0	#DIV/0!	0	0	0	#DIV/0!	0	0	0	contigs_merge_contig_10886	0	1152	0	#DIV/0!	0
contigs_merge_contig_10887	0.126984	0.126984	-0.126984	-2.76113	1.46526	1.46526	-1.46526	-0.613774	0.171614	0.171614	-0.171614	-2.70546	-1.71614e-07	-2.70546	-0.281045	0.778676	1	-1.71614e-07	-2.70546	-0.281045	0.778676	1	0.199087	0.27224	-2.32853	0	24	0.199087	contigs_merge_contig_10887	0	7059	0.27224	-2.32853	0.199087	0.0721035	0.100626	-3.79379	0	8	0.0721035	contigs_merge_contig_10887	0	7059	0.100626	-3.79379	0.0721035
contigs_merge_contig_10888	4.06469	4.06469	4.06469	7.17097	2.84217	2.84217	2.84217	-3.71844	5.69114	5.69114	5.69114	7.31854	5.69114e-06	7.31854	2.07915	0.0376038	1	5.69114e-06	7.31854	2.07915	0.0376038	1	0.658679	0.900704	-0.602353	10	10	0.658679	contigs_merge_contig_10888	0	889	0.900704	-0.602353	0.658679	4.72337	6.59184	2.23982	66	66	4.72337	contigs_merge_contig_10888	0	889	6.59184	2.23982	4.72337
contigs_merge_contig_10889	0.231385	0.231385	0.231385	1.62977	0.704665	0.704665	0.704665	0.512182	0.333255	0.333255	0.333255	1.66331	3.33255e-07	1.66331	0.288095	0.773274	1	3.33255e-07	1.66331	0.288095	0.773274	1	0.367414	0.502416	-1.44452	8	8	0.367414	contigs_merge_contig_10889	0	1275	0.502416	-1.44452	0.367414	0.598798	0.835672	-0.739858	12	12	0.598798	contigs_merge_contig_10889	0	1275	0.835672	-0.739858	0.598798
contigs_merge_contig_1089	0.169505	0.169505	0.169505	1.44868	0.53474	0.53474	0.53474	0.61923	0.247189	0.247189	0.247189	1.47849	2.47189e-07	1.47849	0.218453	0.827076	1	2.47189e-07	1.47849	0.218453	0.827076	1	0.377784	0.516597	-1.40437	3	3	0.377784	contigs_merge_contig_1089	0	465	0.516597	-1.40437	0.377784	0.547289	0.763786	-0.869626	4	4	0.547289	contigs_merge_contig_1089	0	465	0.763786	-0.869626	0.547289
contigs_merge_contig_10890	0	0	0	1	#NUM!	0	#NUM!	#NUM!	0	0	0	1	0	1	0	1	1	0	1	0	1	1	0	0	#DIV/0!	0	0	0	contigs_merge_contig_10890	0	1733	0	#DIV/0!	0	0	0	#DIV/0!	0	0	0	contigs_merge_contig_10890	0	1733	0	#DIV/0!	0
contigs_merge_contig_10891	0.16801	0.16801	0.16801	1.12463	0.169456	0.169456	0.169456	1.3933	0.272407	0.272407	0.272407	1.14778	2.72407e-07	1.14778	0.136905	0.891106	1	2.72407e-07	1.14778	0.136905	0.891106	1	1.34803	1.84335	0.430853	57	57	1.34803	contigs_merge_contig_10891	0	2476	1.84335	0.430853	1.34803	1.51604	2.11576	0.600308	59	59	1.51604	contigs_merge_contig_10891	0	2476	2.11576	0.600308	1.51604
contigs_merge_contig_10892	0.374249	0.374249	0.374249	#DIV/0!	#DIV/0!	0	#DIV/0!	0	0.522295	0.522295	0.522295	#DIV/0!	5.22295e-07	#DIV/0!	0.7227	0.469864	1	5.22295e-07	#DIV/0!	0.7227	0.469865	1	0	0	#DIV/0!	0	0	0	contigs_merge_contig_10892	0	340	0	#DIV/0!	0	0.374249	0.522295	-1.41793	2	2	0.374249	contigs_merge_contig_10892	0	340	0.522295	-1.41793	0.374249
contigs_merge_contig_10893	0	0	0	1	#NUM!	0	#NUM!	#NUM!	0	0	0	1	0	1	0	1	1	0	1	0	1	1	0	0	#DIV/0!	0	0	0	contigs_merge_contig_10893	0	269	0	#DIV/0!	0	0	0	#DIV/0!	0	0	0	contigs_merge_contig_10893	0	269	0	#DIV/0!	0
contigs_merge_contig_10894	0.310806	0.310806	0.310806	2.17302	1.1197	1.1197	1.1197	0.415648	0.441211	0.441211	0.441211	2.21774	4.41211e-07	2.21774	0.408625	0.682815	1	4.41211e-07	2.21774	0.408625	0.682815	1	0.264962	0.362319	-1.91614	1	1	0.264962	contigs_merge_contig_10894	0	221	0.362319	-1.91614	0.264962	0.575767	0.80353	-0.796442	2	2	0.575767	contigs_merge_contig_10894	0	221	0.80353	-0.796442	0.575767
contigs_merge_contig_10895	0.20627	0.20627	0.20627	2.17302	1.1197	1.1197	1.1197	0.55348	0.292816	0.292816	0.292816	2.21774	2.92816e-07	2.21774	0.332889	0.739218	1	2.92816e-07	2.21774	0.332889	0.739218	1	0.175845	0.240458	-2.50762	1	1	0.175845	contigs_merge_contig_10895	0	333	0.240458	-2.50762	0.175845	0.382116	0.533274	-1.38792	2	2	0.382116	contigs_merge_contig_10895	0	333	0.533274	-1.38792	0.382116
contigs_merge_contig_10896	0.154228	0.154228	-0.154228	-2.30094	1.20223	1.20223	-1.20223	-0.609213	0.207561	0.207561	-0.207561	-2.25455	-2.07561e-07	-2.25455	-0.28286	0.777284	1	-2.07561e-07	-2.25455	-0.28286	0.777284	1	0.272779	0.373009	-1.8742	15	15	0.272779	contigs_merge_contig_10896	0	3220	0.373009	-1.8742	0.272779	0.118551	0.165447	-3.07642	6	6	0.118551	contigs_merge_contig_10896	0	3220	0.165447	-3.07642	0.118551
contigs_merge_contig_10897	0.0108523	0.0108523	-0.0108523	-1.84075	0.880297	0.880297	-0.880297	-0.859727	0.0144766	0.0144766	-0.0144766	-1.80364	-1.44766e-08	-1.80364	-0.0644172	0.948638	1	-1.44766e-08	-1.80364	-0.0644172	0.948638	1	0.02376	0.0324904	-5.39532	2	2	0.02376	contigs_merge_contig_10897	0	4929	0.0324904	-5.39532	0.02376	0.0129078	0.0180138	-6.27562	1	1	0.0129078	contigs_merge_contig_10897	0	4929	0.0180138	-6.27562	0.0129078
contigs_merge_contig_10898	0.104025	0.104025	-0.104025	-2.30094	1.20223	1.20223	-1.20223	-0.670131	0.139997	0.139997	-0.139997	-2.25455	-1.39997e-07	-2.25455	-0.232305	0.816301	1	-1.39997e-07	-2.25455	-0.232305	0.816301	1	0.183986	0.25159	-2.44233	13	15	0.183986	contigs_merge_contig_10898	0	4774	0.25159	-2.44233	0.183986	0.079961	0.111592	-3.64456	6	6	0.079961	contigs_merge_contig_10898	0	4774	0.111592	-3.64456	0.079961
contigs_merge_contig_10899	0.436347	0.436347	0.436347	1.25807	0.331207	0.331207	0.331207	1.4371	0.65654	0.65654	0.65654	1.28396	6.5654e-07	1.28396	0.285701	0.775107	1	6.5654e-07	1.28396	0.285701	0.775107	1	1.69084	2.31213	0.757742	19	19	1.69084	contigs_merge_contig_10899	0	658	2.31213	0.757742	1.69084	2.12719	2.96867	1.08895	22	22	2.12719	contigs_merge_contig_10899	0	658	2.96867	1.08895	2.12719
contigs_merge_contig_109	2.84768	2.84768	2.84768	1.53035	0.613863	0.613863	0.613863	1.25316	4.12527	4.12527	4.12527	1.56184	4.12527e-06	1.56184	0.951174	0.341516	1	4.12527e-06	1.56184	0.951174	0.341516	1	5.36943	7.34237	2.42477	828	847	5.36943	contigs_merge_contig_109	0	9237	7.34237	2.42477	5.36943	8.21711	11.4676	3.03863	1180	1193	8.21711	contigs_merge_contig_109	0	9237	11.4676	3.03863	8.21711
contigs_merge_contig_1090	0.38285	0.38285	0.38285	1.51453	0.59887	0.59887	0.59887	-0.404223	0.555237	0.555237	0.555237	1.5457	5.55237e-07	1.5457	0.344995	0.730098	1	5.55237e-07	1.5457	0.344995	0.730099	1	0.744076	1.01748	-0.426478	30	33	0.744076	contigs_merge_contig_1090	0	2597	1.01748	-0.426478	0.744076	1.12693	1.57272	0.172392	46	46	1.12693	contigs_merge_contig_1090	0	2597	1.57272	0.172392	1.12693
contigs_merge_contig_10900	0.456074	0.456074	0.456074	#DIV/0!	#DIV/0!	0	#DIV/0!	0	0.636488	0.636488	0.636488	#DIV/0!	6.36488e-07	#DIV/0!	0.797802	0.424985	1	6.36488e-07	#DIV/0!	0.797802	0.424985	1	0	0	#DIV/0!	0	0	0	contigs_merge_contig_10900	0	279	0	#DIV/0!	0	0.456074	0.636488	-1.13266	2	2	0.456074	contigs_merge_contig_10900	0	279	0.636488	-1.13266	0.456074
contigs_merge_contig_10901	0.00523053	0.00523053	0.00523053	1.08651	0.119703	0.119703	0.119703	0.970428	0.00900107	0.00900107	0.00900107	1.10887	9.00107e-09	1.10887	0.0215564	0.982802	1	9.00107e-09	1.10887	0.0215564	0.982802	1	0.0604611	0.0826769	-4.04785	4	4	0.0604611	contigs_merge_contig_10901	0	3874	0.0826769	-4.04785	0.0604611	0.0656916	0.091678	-3.92815	4	4	0.0656916	contigs_merge_contig_10901	0	3874	0.091678	-3.92815	0.0656916
contigs_merge_contig_10902	0.00601993	0.00601993	0.00601993	1.08651	0.119703	0.119703	0.119703	0.968869	0.0103595	0.0103595	0.0103595	1.10887	1.03595e-08	1.10887	0.023126	0.98155	1	1.03595e-08	1.10887	0.023126	0.98155	1	0.0695859	0.0951546	-3.84506	2	2	0.0695859	contigs_merge_contig_10902	0	1683	0.0951546	-3.84506	0.0695859	0.0756058	0.105514	-3.72536	2	2	0.0756058	contigs_merge_contig_10902	0	1683	0.105514	-3.72536	0.0756058
contigs_merge_contig_10903	0.37206	0.37206	0.37206	#DIV/0!	#DIV/0!	0	#DIV/0!	0	0.51924	0.51924	0.51924	#DIV/0!	5.1924e-07	#DIV/0!	0.720583	0.471166	1	5.1924e-07	#DIV/0!	0.720584	0.471166	1	0	0	#DIV/0!	0	0	0	contigs_merge_contig_10903	0	342	0	#DIV/0!	0	0.37206	0.51924	-1.42639	2	2	0.37206	contigs_merge_contig_10903	0	342	0.51924	-1.42639	0.37206
contigs_merge_contig_10904	0.132781	0.132781	-0.132781	#DIV/0!	#DIV/0!	0	#DIV/0!	0	0.18157	0.18157	-0.18157	#DIV/0!	-1.8157e-07	#DIV/0!	-0.426111	0.670027	1	-1.8157e-07	#DIV/0!	-0.426111	0.670027	1	0.132781	0.18157	-2.91288	1	1	0.132781	contigs_merge_contig_10904	0	441	0.18157	-2.91288	0.132781	0	0	#DIV/0!	0	0	0	contigs_merge_contig_10904	0	441	0	#DIV/0!	0
contigs_merge_contig_10905	0.11036	0.11036	0.11036	#DIV/0!	#DIV/0!	0	#DIV/0!	0	0.154016	0.154016	0.154016	#DIV/0!	1.54016e-07	#DIV/0!	0.392448	0.694727	1	1.54016e-07	#DIV/0!	0.392448	0.694727	1	0	0	#DIV/0!	0	0	0	contigs_merge_contig_10905	0	1153	0	#DIV/0!	0	0.11036	0.154016	-3.17972	2	2	0.11036	contigs_merge_contig_10905	0	1153	0.154016	-3.17972	0.11036
contigs_merge_contig_10906	0	0	0	1	#NUM!	0	#NUM!	#NUM!	0	0	0	1	0	1	0	1	1	0	1	0	1	1	0	0	#DIV/0!	0	0	0	contigs_merge_contig_10906	0	224	0	#DIV/0!	0	0	0	#DIV/0!	0	0	0	contigs_merge_contig_10906	0	224	0	#DIV/0!	0
contigs_merge_contig_10907	0.147127	0.147127	-0.147127	#DIV/0!	#DIV/0!	0	#DIV/0!	0	0.201187	0.201187	-0.201187	#DIV/0!	-2.01187e-07	#DIV/0!	-0.448539	0.653764	1	-2.01187e-07	#DIV/0!	-0.448539	0.653764	1	0.147127	0.201187	-2.76487	1	1	0.147127	contigs_merge_contig_10907	0	398	0.201187	-2.76487	0.147127	0	0	#DIV/0!	0	0	0	contigs_merge_contig_10907	0	398	0	#DIV/0!	0
contigs_merge_contig_10908	1.47171	1.47171	1.47171	1.78299	0.8343	0.8343	0.8343	1.91639	2.10678	2.10678	2.10678	1.81968	2.10678e-06	1.81968	0.782588	0.433869	1	2.10678e-06	1.81968	0.782589	0.433869	1	1.87959	2.57023	0.91042	39	39	1.87959	contigs_merge_contig_10908	0	1215	2.57023	0.91042	1.87959	3.3513	4.67701	1.74472	64	64	3.3513	contigs_merge_contig_10908	0	1215	4.67701	1.74472	3.3513
contigs_merge_contig_10909	9.50341	9.50341	9.50341	1.604	0.681677	0.681677	0.681677	1.17146	13.7056	13.7056	13.7056	1.63701	1.37056e-05	1.63701	1.81959	0.0688222	1	1.37056e-05	1.63701	1.81959	0.0688221	1	15.734	21.5153	3.97582	618	970	15.734	contigs_merge_contig_10909	0	3610	21.5153	3.97582	15.734	25.2374	35.2209	4.65749	776	1432	25.2374	contigs_merge_contig_10909	0	3610	35.2209	4.65749	25.2374
contigs_merge_contig_1091	0.221953	0.221953	-0.221953	-1.84075	0.880297	0.880297	-0.880297	-0.541853	0.296079	0.296079	-0.296079	-1.80364	-2.96079e-07	-1.80364	-0.291322	0.770805	1	-2.96079e-07	-1.80364	-0.291322	0.770805	1	0.485946	0.664503	-1.04113	2	2	0.485946	contigs_merge_contig_1091	0	241	0.664503	-1.04113	0.485946	0.263993	0.368424	-1.92143	1	1	0.263993	contigs_merge_contig_1091	0	241	0.368424	-1.92143	0.263993
contigs_merge_contig_10910	4.96658	4.96658	-4.96658	-1.11534	0.157481	0.157481	-0.157481	-1.02901	5.57972	5.57972	-5.57972	-1.09285	-5.57972e-06	-1.09285	-0.497551	0.618801	1	-5.57972e-06	-1.09285	-0.497551	0.618801	1	48.0275	65.6748	5.58579	1363	1373	48.0275	contigs_merge_contig_10910	0	1674	65.6748	5.58579	48.0275	43.061	60.0951	5.42831	1126	1133	43.061	contigs_merge_contig_10910	0	1674	60.0951	5.42831	43.061
contigs_merge_contig_10911	0.233194	0.233194	0.233194	1.44868	0.53474	0.53474	0.53474	0.433633	0.340067	0.340067	0.340067	1.47849	3.40067e-07	1.47849	0.256228	0.797775	1	3.40067e-07	1.47849	0.256228	0.797775	1	0.519733	0.710703	-0.944159	4	6	0.519733	contigs_merge_contig_10911	0	676	0.710703	-0.944159	0.519733	0.752927	1.05077	-0.409419	7	8	0.752927	contigs_merge_contig_10911	0	676	1.05077	-0.409419	0.752927
contigs_merge_contig_10912	0.0184882	0.0184882	0.0184882	1.08651	0.119703	0.119703	0.119703	0.946232	0.0318158	0.0318158	0.0318158	1.10887	3.18158e-08	1.10887	0.0405277	0.967672	1	3.18158e-08	1.10887	0.0405277	0.967672	1	0.21371	0.292236	-2.22627	1	1	0.21371	contigs_merge_contig_10912	0	274	0.292236	-2.22627	0.21371	0.232198	0.324051	-2.10657	1	1	0.232198	contigs_merge_contig_10912	0	274	0.324051	-2.10657	0.232198
contigs_merge_contig_10913	0	0	0	1	#NUM!	0	#NUM!	#NUM!	0	0	0	1	0	1	0	1	1	0	1	0	1	1	0	0	#DIV/0!	0	0	0	contigs_merge_contig_10913	0	508	0	#DIV/0!	0	0	0	#DIV/0!	0	0	0	contigs_merge_contig_10913	0	508	0	#DIV/0!	0
contigs_merge_contig_10914	0	0	0	1	#NUM!	0	#NUM!	#NUM!	0	0	0	1	0	1	0	1	1	0	1	0	1	1	0	0	#DIV/0!	0	0	0	contigs_merge_contig_10914	0	1337	0	#DIV/0!	0	0	0	#DIV/0!	0	0	0	contigs_merge_contig_10914	0	1337	0	#DIV/0!	0
contigs_merge_contig_10915	0	0	0	1	#NUM!	0	#NUM!	#NUM!	0	0	0	1	0	1	0	1	1	0	1	0	1	1	0	0	#DIV/0!	0	0	0	contigs_merge_contig_10915	0	564	0	#DIV/0!	0	0	0	#DIV/0!	0	0	0	contigs_merge_contig_10915	0	564	0	#DIV/0!	0
contigs_merge_contig_10916	1.4903	1.4903	1.4903	1.53099	0.614467	0.614467	0.614467	1.41272	2.15882	2.15882	2.15882	1.5625	2.15882e-06	1.5625	0.688396	0.491204	1	2.15882e-06	1.5625	0.688396	0.491204	1	2.80663	3.8379	1.48884	22	22	2.80663	contigs_merge_contig_10916	0	459	3.8379	1.48884	2.80663	4.29693	5.99672	2.10331	31	31	4.29693	contigs_merge_contig_10916	0	459	5.99672	2.10331	4.29693
contigs_merge_contig_10917	0.993435	0.993435	0.993435	1.38832	0.473339	0.473339	0.473339	1.34928	1.45841	1.45841	1.45841	1.41689	1.45841e-06	1.41689	0.501561	0.615977	1	1.45841e-06	1.41689	0.501561	0.615977	1	2.55829	3.49832	1.35518	18	18	2.55829	contigs_merge_contig_10917	0	412	3.49832	1.35518	2.55829	3.55173	4.95673	1.82852	23	23	3.55173	contigs_merge_contig_10917	0	412	4.95673	1.82852	3.55173
contigs_merge_contig_10918	1.25803	1.25803	1.25803	1.39694	0.482273	0.482273	0.482273	1.2898	1.84487	1.84487	1.84487	1.42569	1.84487e-06	1.42569	0.569001	0.569355	1	1.84487e-06	1.42569	0.569001	0.569355	1	3.1693	4.33382	1.66416	21	21	3.1693	contigs_merge_contig_10918	0	388	4.33382	1.66416	3.1693	4.42733	6.17869	2.14644	27	27	4.42733	contigs_merge_contig_10918	0	388	6.17869	2.14644	4.42733
contigs_merge_contig_10919	0.361698	0.361698	0.361698	6.51906	2.70467	2.70467	2.70467	0.312064	0.506623	0.506623	0.506623	6.65322	5.06623e-07	6.65322	0.611742	0.540708	1	5.06623e-07	6.65322	0.611742	0.540708	1	0.0655361	0.0896168	-3.93157	2	2	0.0655361	contigs_merge_contig_10919	0	1787	0.0896168	-3.93157	0.0655361	0.427234	0.59624	-1.2269	12	12	0.427234	contigs_merge_contig_10919	0	1787	0.59624	-1.2269	0.427234
contigs_merge_contig_1092	0	0	0	1	#NUM!	0	#NUM!	#NUM!	0	0	0	1	0	1	0	1	1	0	1	0	1	1	0	0	#DIV/0!	0	0	0	contigs_merge_contig_1092	0	246	0	#DIV/0!	0	0	0	#DIV/0!	0	0	0	contigs_merge_contig_1092	0	246	0	#DIV/0!	0
contigs_merge_contig_10920	4.20849	4.20849	4.20849	2.75807	1.46366	1.46366	1.46366	2.16226	5.94066	5.94066	5.94066	2.81482	5.94066e-06	2.81482	1.68112	0.0927395	1	5.94066e-06	2.81482	1.68112	0.0927395	1	2.39382	3.27341	1.25931	13	13	2.39382	contigs_merge_contig_10920	0	318	3.27341	1.25931	2.39382	6.60231	9.21407	2.72297	33	33	6.60231	contigs_merge_contig_10920	0	318	9.21407	2.72297	6.60231
contigs_merge_contig_10921	1.55406	1.55406	-1.55406	-1.61066	0.687652	0.687652	-0.687652	-1.51028	2.05348	2.05348	-2.05348	-1.57818	-2.05348e-06	-1.57818	-0.678612	0.497384	1	-2.05348e-06	-1.57818	-0.678612	0.497384	1	4.09896	5.60508	2.03526	14	14	4.09896	contigs_merge_contig_10921	0	200	5.60508	2.03526	4.09896	2.54489	3.5516	1.3476	8	8	2.54489	contigs_merge_contig_10921	0	200	3.5516	1.3476	2.54489
contigs_merge_contig_10922	0.00468662	0.00468662	0.00468662	1.00153	0.00220896	0.00220896	0.00220896	1.00137	0.0926109	0.0926109	0.0926109	1.02214	9.26109e-08	1.02214	0.0318453	0.974595	1	9.26109e-08	1.02214	0.0318453	0.974595	1	3.05854	4.18237	1.61284	74	179	3.05854	contigs_merge_contig_10922	0	3427	4.18237	1.61284	3.05854	3.06323	4.27498	1.61505	79	165	3.06323	contigs_merge_contig_10922	0	3427	4.27498	1.61505	3.06323
contigs_merge_contig_10923	0.0944847	0.0944847	0.0944847	1.49395	0.579134	0.579134	0.579134	0.7573	0.137244	0.137244	0.137244	1.5247	1.37244e-07	1.5247	0.168887	0.865885	1	1.37244e-07	1.5247	0.168887	0.865885	1	0.191283	0.261568	-2.38622	8	8	0.191283	contigs_merge_contig_10923	0	2449	0.261568	-2.38622	0.191283	0.285768	0.398812	-1.80708	11	11	0.285768	contigs_merge_contig_10923	0	2449	0.398812	-1.80708	0.285768
contigs_merge_contig_10924	0	0	0	1	#NUM!	0	#NUM!	#NUM!	0	0	0	1	0	1	0	1	1	0	1	0	1	1	0	0	#DIV/0!	0	0	0	contigs_merge_contig_10924	0	679	0	#DIV/0!	0	0	0	#DIV/0!	0	0	0	contigs_merge_contig_10924	0	679	0	#DIV/0!	0
contigs_merge_contig_10925	0	0	0	1	#NUM!	0	#NUM!	#NUM!	0	0	0	1	0	1	0	1	1	0	1	0	1	1	0	0	#DIV/0!	0	0	0	contigs_merge_contig_10925	0	2115	0	#DIV/0!	0	0	0	#DIV/0!	0	0	0	contigs_merge_contig_10925	0	2115	0	#DIV/0!	0
contigs_merge_contig_10926	0	0	0	1	#NUM!	0	#NUM!	#NUM!	0	0	0	1	0	1	0	1	1	0	1	0	1	1	0	0	#DIV/0!	0	0	0	contigs_merge_contig_10926	0	978	0	#DIV/0!	0	0	0	#DIV/0!	0	0	0	contigs_merge_contig_10926	0	978	0	#DIV/0!	0
contigs_merge_contig_10927	0.33563	0.33563	0.33563	1.13562	0.183478	0.183478	0.183478	1.14035	0.538043	0.538043	0.538043	1.15899	5.38043e-07	1.15899	0.199052	0.842222	1	5.38043e-07	1.15899	0.199052	0.842222	1	2.47481	3.38416	1.30732	98	177	2.47481	contigs_merge_contig_10927	0	4188	3.38416	1.30732	2.47481	2.81044	3.9222	1.4908	115	185	2.81044	contigs_merge_contig_10927	0	4188	3.9222	1.4908	2.81044
contigs_merge_contig_10928	0.0211957	0.0211957	0.0211957	1.08651	0.119703	0.119703	0.119703	0.941007	0.036475	0.036475	0.036475	1.10887	3.6475e-08	1.10887	0.0433938	0.965388	1	3.6475e-08	1.10887	0.0433938	0.965388	1	0.245006	0.335032	-2.02911	2	2	0.245006	contigs_merge_contig_10928	0	478	0.335032	-2.02911	0.245006	0.266202	0.371507	-1.90941	2	2	0.266202	contigs_merge_contig_10928	0	478	0.371507	-1.90941	0.266202
contigs_merge_contig_10929	0.002948	0.002948	-0.002948	-1.00405	0.00582836	0.00582836	-0.00582836	-0.98726	0.0164624	0.0164624	0.0164624	1.01646	1.64624e-08	1.01646	0.0115938	0.99075	1	1.64624e-08	1.01646	0.0115938	0.99075	1	0.731195	0.999866	-0.451672	12	12	0.731195	contigs_merge_contig_10929	0	961	0.999866	-0.451672	0.731195	0.728247	1.01633	-0.4575	11	11	0.728247	contigs_merge_contig_10929	0	961	1.01633	-0.4575	0.728247
contigs_merge_contig_1093	0.0779155	0.0779155	0.0779155	#DIV/0!	#DIV/0!	0	#DIV/0!	0	0.108737	0.108737	0.108737	#DIV/0!	1.08737e-07	#DIV/0!	0.329754	0.741586	1	1.08737e-07	#DIV/0!	0.329754	0.741586	1	0	0	#DIV/0!	0	0	0	contigs_merge_contig_1093	0	7349	0	#DIV/0!	0	0.0779155	0.108737	-3.68195	9	9	0.0779155	contigs_merge_contig_1093	0	7349	0.108737	-3.68195	0.0779155
contigs_merge_contig_10930	2.01663	2.01663	2.01663	1.46365	0.549567	0.549567	0.549567	1.25913	2.93677	2.93677	2.93677	1.49377	2.93677e-06	1.49377	0.762553	0.44573	1	2.93677e-06	1.49377	0.762554	0.44573	1	4.3495	5.94769	2.12085	83	121	4.3495	contigs_merge_contig_10930	0	1629	5.94769	2.12085	4.3495	6.36614	8.88446	2.67042	122	163	6.36614	contigs_merge_contig_10930	0	1629	8.88446	2.67042	6.36614
contigs_merge_contig_10931	0	0	0	1	#NUM!	0	#NUM!	#NUM!	0	0	0	1	0	1	0	1	1	0	1	0	1	1	0	0	#DIV/0!	0	0	0	contigs_merge_contig_10931	0	232	0	#DIV/0!	0	0	0	#DIV/0!	0	0	0	contigs_merge_contig_10931	0	232	0	#DIV/0!	0
contigs_merge_contig_10932	1.04017	1.04017	1.04017	1.29851	0.37686	0.37686	0.37686	1.20926	1.54969	1.54969	1.54969	1.32524	1.54969e-06	1.32524	0.465575	0.64152	1	1.54969e-06	1.32524	0.465575	0.64152	1	3.4845	4.76484	1.80095	69	82	3.4845	contigs_merge_contig_10932	0	1378	4.76484	1.80095	3.4845	4.52466	6.31454	2.17781	89	98	4.52466	contigs_merge_contig_10932	0	1378	6.31454	2.17781	4.52466
contigs_merge_contig_10933	0.0375426	0.0375426	-0.0375426	-1.15047	0.202226	0.202226	-0.202226	-0.899033	0.0443161	0.0443161	-0.0443161	-1.12727	-4.43161e-08	-1.12727	-0.0514918	0.958934	1	-4.43161e-08	-1.12727	-0.0514918	0.958934	1	0.287042	0.392513	-1.80067	5	5	0.287042	contigs_merge_contig_10933	0	1020	0.392513	-1.80067	0.287042	0.249499	0.348196	-2.00289	4	4	0.249499	contigs_merge_contig_10933	0	1020	0.348196	-2.00289	0.249499
contigs_merge_contig_10934	0.172301	0.172301	-0.172301	-4.60189	2.20223	2.20223	-2.20223	-0.497868	0.234265	0.234265	-0.234265	-4.50909	-2.34265e-07	-4.50909	-0.386288	0.699283	1	-2.34265e-07	-4.50909	-0.386288	0.699283	1	0.220137	0.301025	-2.18352	4	5	0.220137	contigs_merge_contig_10934	0	1330	0.301025	-2.18352	0.220137	0.0478363	0.0667595	-4.38575	1	1	0.0478363	contigs_merge_contig_10934	0	1330	0.0667595	-4.38575	0.0478363
contigs_merge_contig_10935	1.71471	1.71471	1.71471	2.11584	1.08123	1.08123	1.08123	2.74437	2.43626	2.43626	2.43626	2.15938	2.43626e-06	2.15938	0.945529	0.344389	1	2.43626e-06	2.15938	0.945529	0.344389	1	1.5367	2.10135	0.61984	36	38	1.5367	contigs_merge_contig_10935	0	1448	2.10135	0.61984	1.5367	3.25142	4.53762	1.70107	71	74	3.25142	contigs_merge_contig_10935	0	1448	4.53762	1.70107	3.25142
contigs_merge_contig_10936	0	0	0	1	#NUM!	0	#NUM!	#NUM!	0	0	0	1	0	1	0	1	1	0	1	0	1	1	0	0	#DIV/0!	0	0	0	contigs_merge_contig_10936	0	262	0	#DIV/0!	0	0	0	#DIV/0!	0	0	0	contigs_merge_contig_10936	0	262	0	#DIV/0!	0
contigs_merge_contig_10937	0	0	0	1	#NUM!	0	#NUM!	#NUM!	0	0	0	1	0	1	0	1	1	0	1	0	1	1	0	0	#DIV/0!	0	0	0	contigs_merge_contig_10937	0	756	0	#DIV/0!	0	0	0	#DIV/0!	0	0	0	contigs_merge_contig_10937	0	756	0	#DIV/0!	0
contigs_merge_contig_10938	0	0	0	1	#NUM!	0	#NUM!	#NUM!	0	0	0	1	0	1	0	1	1	0	1	0	1	1	0	0	#DIV/0!	0	0	0	contigs_merge_contig_10938	0	616	0	#DIV/0!	0	0	0	#DIV/0!	0	0	0	contigs_merge_contig_10938	0	616	0	#DIV/0!	0
contigs_merge_contig_10939	1.67064	1.67064	1.67064	3.10793	1.63595	1.63595	1.63595	-3.87723	2.35381	2.35381	2.35381	3.17189	2.35381e-06	3.17189	1.10698	0.268304	1	2.35381e-06	3.17189	1.10698	0.268304	1	0.79255	1.08376	-0.335426	9	43	0.79255	contigs_merge_contig_10939	0	3177	1.08376	-0.335426	0.79255	2.46319	3.43758	1.30053	19	123	2.46319	contigs_merge_contig_10939	0	3177	3.43758	1.30053	2.46319
contigs_merge_contig_1094	0.0154934	0.0154934	0.0154934	1.0186	0.0265931	0.0265931	0.0265931	0.89925	0.0450582	0.0450582	0.0450582	1.03957	4.50582e-08	1.03957	0.0295651	0.976414	1	4.50582e-08	1.03957	0.0295651	0.976414	1	0.832804	1.13881	-0.263951	0	16	0.832804	contigs_merge_contig_1094	0	1125	1.13881	-0.263951	0.832804	0.848297	1.18387	-0.237358	0	15	0.848297	contigs_merge_contig_1094	0	1125	1.18387	-0.237358	0.848297
contigs_merge_contig_10940	0.00285375	0.00285375	-0.00285375	-1.02264	0.0323006	0.0323006	-0.0323006	-0.98919	0.000355435	0.000355435	-0.000355435	-1.00202	-3.55435e-10	-1.00202	-0.000598955	0.999522	1	-3.55435e-10	-1.00202	-0.000598955	0.999522	1	0.128894	0.176255	-2.95574	0	10	0.128894	contigs_merge_contig_10940	0	4543	0.176255	-2.95574	0.128894	0.12604	0.175899	-2.98804	0	9	0.12604	contigs_merge_contig_10940	0	4543	0.175899	-2.98804	0.12604
contigs_merge_contig_10941	1.38193	1.38193	-1.38193	-1.05134	0.0722296	0.0722296	-0.0722296	-1.0152	1.13223	1.13223	-1.13223	-1.03014	-1.13223e-06	-1.03014	-0.129655	0.896839	1	-1.13223e-06	-1.03014	-0.129655	0.896839	1	28.2991	38.6973	4.82268	289	289	28.2991	contigs_merge_contig_10941	0	598	38.6973	4.82268	28.2991	26.9171	37.565	4.75045	253	253	26.9171	contigs_merge_contig_10941	0	598	37.565	4.75045	26.9171
contigs_merge_contig_10942	2.68063	2.68063	2.68063	1.14687	0.197705	0.197705	0.197705	1.04719	4.25465	4.25465	4.25465	1.17047	4.25465e-06	1.17047	0.578082	0.563208	1	4.25465e-06	1.17047	0.578082	0.563209	1	18.2514	24.9577	4.18993	72	72	18.2514	contigs_merge_contig_10942	0	231	24.9577	4.18993	18.2514	20.932	29.2123	4.38764	75	76	20.932	contigs_merge_contig_10942	0	231	29.2123	4.38764	20.932
contigs_merge_contig_10943	0.18311	0.18311	0.18311	1.23467	0.304127	0.304127	0.304127	0.150328	0.277502	0.277502	0.277502	1.26008	2.77502e-07	1.26008	0.1787	0.858173	1	2.77502e-07	1.26008	0.1787	0.858173	1	0.780281	1.06699	-0.357935	29	44	0.780281	contigs_merge_contig_10943	0	3302	1.06699	-0.357935	0.780281	0.96339	1.34449	-0.0538076	42	50	0.96339	contigs_merge_contig_10943	0	3302	1.34449	-0.0538076	0.96339
contigs_merge_contig_10944	0.808582	0.808582	0.808582	5.43255	2.44163	2.44163	2.44163	0.00531262	1.13358	1.13358	1.13358	5.54435	1.13358e-06	5.54435	0.887214	0.374964	1	1.13358e-06	5.54435	0.887214	0.374964	1	0.182419	0.249447	-2.45467	1	1	0.182419	contigs_merge_contig_10944	0	321	0.249447	-2.45467	0.182419	0.991002	1.38302	-0.0130407	4	5	0.991002	contigs_merge_contig_10944	0	321	1.38302	-0.0130407	0.991002
contigs_merge_contig_10945	0.453288	0.453288	0.453288	2.28943	1.19499	1.19499	1.19499	0.207691	0.642492	0.642492	0.642492	2.33655	6.42492e-07	2.33655	0.507315	0.611934	1	6.42492e-07	2.33655	0.507315	0.611934	1	0.35154	0.48071	-1.50824	0	28	0.35154	contigs_merge_contig_10945	0	4664	0.48071	-1.50824	0.35154	0.804828	1.1232	-0.313248	4	59	0.804828	contigs_merge_contig_10945	0	4664	1.1232	-0.313248	0.804828
contigs_merge_contig_10946	0	0	0	1	#NUM!	0	#NUM!	#NUM!	0	0	0	1	0	1	0	1	1	0	1	0	1	1	0	0	#DIV/0!	0	0	0	contigs_merge_contig_10946	0	350	0	#DIV/0!	0	0	0	#DIV/0!	0	0	0	contigs_merge_contig_10946	0	350	0	#DIV/0!	0
contigs_merge_contig_10947	0.838945	0.838945	-0.838945	-1.65668	0.728294	0.728294	-0.728294	-3.0609	1.11126	1.11126	-1.11126	-1.62327	-1.11126e-06	-1.62327	-0.513837	0.607366	1	-1.11126e-06	-1.62327	-0.513837	0.607366	1	2.1165	2.89419	1.08168	9	9	2.1165	contigs_merge_contig_10947	0	249	2.89419	1.08168	2.1165	1.27756	1.78293	0.353387	5	5	1.27756	contigs_merge_contig_10947	0	249	1.78293	0.353387	1.27756
contigs_merge_contig_10948	0.0258129	0.0258129	-0.0258129	-1.38057	0.46526	0.46526	-0.46526	-0.880149	0.0333889	0.0333889	-0.0333889	-1.35273	-3.33889e-08	-1.35273	-0.0707514	0.943596	1	-3.33889e-08	-1.35273	-0.0707514	0.943596	1	0.0936405	0.128048	-3.41672	3	3	0.0936405	contigs_merge_contig_10948	0	1876	0.128048	-3.41672	0.0936405	0.0678276	0.094659	-3.88198	2	2	0.0678276	contigs_merge_contig_10948	0	1876	0.094659	-3.88198	0.0678276
contigs_merge_contig_10949	0.233292	0.233292	0.233292	1.0996	0.136981	0.136981	0.136981	1.11156	0.391492	0.391492	0.391492	1.12223	3.91492e-07	1.12223	0.15016	0.880638	1	3.91492e-07	1.12223	0.15016	0.880638	1	2.34226	3.2029	1.2279	83	83	2.34226	contigs_merge_contig_10949	0	2075	3.2029	1.2279	2.34226	2.57555	3.59439	1.36488	84	84	2.57555	contigs_merge_contig_10949	0	2075	3.59439	1.36488	2.57555
contigs_merge_contig_1095	0	0	0	1	#NUM!	0	#NUM!	#NUM!	0	0	0	1	0	1	0	1	1	0	1	0	1	1	0	0	#DIV/0!	0	0	0	contigs_merge_contig_1095	0	660	0	#DIV/0!	0	0	0	#DIV/0!	0	0	0	contigs_merge_contig_1095	0	660	0	#DIV/0!	0
contigs_merge_contig_10950	0	0	0	1	#NUM!	0	#NUM!	#NUM!	0	0	0	1	0	1	0	1	1	0	1	0	1	1	0	0	#DIV/0!	0	0	0	contigs_merge_contig_10950	0	538	0	#DIV/0!	0	0	0	#DIV/0!	0	0	0	contigs_merge_contig_10950	0	538	0	#DIV/0!	0
contigs_merge_contig_10951	0.0231632	0.0231632	-0.0231632	#DIV/0!	#DIV/0!	0	#DIV/0!	0	0.0316743	0.0316743	-0.0316743	#DIV/0!	-3.16743e-08	#DIV/0!	-0.177973	0.858744	1	-3.16743e-08	#DIV/0!	-0.177973	0.858744	1	0.0231632	0.0316743	-5.43202	2	2	0.0231632	contigs_merge_contig_10951	0	5056	0.0316743	-5.43202	0.0231632	0	0	#DIV/0!	0	0	0	contigs_merge_contig_10951	0	5056	0	#DIV/0!	0
contigs_merge_contig_10952	0	0	0	1	#NUM!	0	#NUM!	#NUM!	0	0	0	1	0	1	0	1	1	0	1	0	1	1	0	0	#DIV/0!	0	0	0	contigs_merge_contig_10952	0	850	0	#DIV/0!	0	0	0	#DIV/0!	0	0	0	contigs_merge_contig_10952	0	850	0	#DIV/0!	0
contigs_merge_contig_10953	1.28494	1.28494	-1.28494	#DIV/0!	#DIV/0!	0	#DIV/0!	0	1.75708	1.75708	-1.75708	#DIV/0!	-1.75708e-06	#DIV/0!	-1.32555	0.184989	1	-1.75708e-06	#DIV/0!	-1.32555	0.184989	1	1.28494	1.75708	0.3617	7	7	1.28494	contigs_merge_contig_10953	0	319	1.75708	0.3617	1.28494	0	0	#DIV/0!	0	0	0	contigs_merge_contig_10953	0	319	0	#DIV/0!	0
contigs_merge_contig_10954	0	0	0	1	#NUM!	0	#NUM!	#NUM!	0	0	0	1	0	1	0	1	1	0	1	0	1	1	0	0	#DIV/0!	0	0	0	contigs_merge_contig_10954	0	523	0	#DIV/0!	0	0	0	#DIV/0!	0	0	0	contigs_merge_contig_10954	0	523	0	#DIV/0!	0
contigs_merge_contig_10955	0.771178	0.771178	0.771178	1.6485	0.721153	0.721153	0.721153	3.88509	1.10971	1.10971	1.10971	1.68242	1.10971e-06	1.68242	0.531334	0.595187	1	1.10971e-06	1.68242	0.531334	0.595187	1	1.18917	1.62612	0.249959	29	29	1.18917	contigs_merge_contig_10955	0	1428	1.62612	0.249959	1.18917	1.96035	2.73583	0.971112	44	44	1.96035	contigs_merge_contig_10955	0	1428	2.73583	0.971112	1.96035
contigs_merge_contig_10956	0.253475	0.253475	0.253475	#DIV/0!	#DIV/0!	0	#DIV/0!	0	0.353745	0.353745	0.353745	#DIV/0!	3.53745e-07	#DIV/0!	0.594765	0.552001	1	3.53745e-07	#DIV/0!	0.594765	0.552001	1	0	0	#DIV/0!	0	0	0	contigs_merge_contig_10956	0	251	0	#DIV/0!	0	0.253475	0.353745	-1.98008	0	1	0.253475	contigs_merge_contig_10956	0	251	0.353745	-1.98008	0.253475
contigs_merge_contig_10957	0.185795	0.185795	-0.185795	#DIV/0!	#DIV/0!	0	#DIV/0!	0	0.254064	0.254064	-0.254064	#DIV/0!	-2.54064e-07	#DIV/0!	-0.504048	0.614228	1	-2.54064e-07	#DIV/0!	-0.504048	0.614228	1	0.185795	0.254064	-2.42821	2	6	0.185795	contigs_merge_contig_10957	0	1891	0.254064	-2.42821	0.185795	0	0	#DIV/0!	0	0	0	contigs_merge_contig_10957	0	1891	0	#DIV/0!	0
contigs_merge_contig_10958	4.83321	4.83321	4.83321	2.06117	1.04347	1.04347	1.04347	1.47705	6.87331	6.87331	6.87331	2.10359	6.87331e-06	2.10359	1.56335	0.11797	1	6.87331e-06	2.10359	1.56335	0.11797	1	4.55458	6.22812	2.18732	272	272	4.55458	contigs_merge_contig_10958	0	3497	6.22812	2.18732	4.55458	9.38779	13.1014	3.23079	516	516	9.38779	contigs_merge_contig_10958	0	3497	13.1014	3.23079	9.38779
contigs_merge_contig_10959	0.206183	0.206183	0.206183	7.60558	2.92706	2.92706	2.92706	0.414786	0.288624	0.288624	0.288624	7.76209	2.88624e-07	7.76209	0.471957	0.636957	1	2.88624e-07	7.76209	0.471957	0.636957	1	0.0312135	0.0426826	-5.00169	1	1	0.0312135	contigs_merge_contig_10959	0	1876	0.0426826	-5.00169	0.0312135	0.237397	0.331306	-2.07463	5	7	0.237397	contigs_merge_contig_10959	0	1876	0.331306	-2.07463	0.237397
contigs_merge_contig_1096	0.794738	0.794738	-0.794738	-3.68151	1.8803	1.8803	-1.8803	0.0717037	1.07842	1.07842	-1.07842	-3.60727	-1.07842e-06	-3.60727	-0.781205	0.434682	1	-1.07842e-06	-3.60727	-0.781205	0.434682	1	1.09112	1.49204	0.125804	12	12	1.09112	contigs_merge_contig_1096	0	644	1.49204	0.125804	1.09112	0.296377	0.413619	-1.75449	3	3	0.296377	contigs_merge_contig_1096	0	644	0.413619	-1.75449	0.296377
contigs_merge_contig_10960	0.598617	0.598617	-0.598617	-1.88356	0.913464	0.913464	-0.913464	0.62625	0.799508	0.799508	-0.799508	-1.84558	-7.99508e-07	-1.84558	-0.487421	0.62596	1	-7.99508e-07	-1.84558	-0.487421	0.62596	1	1.27612	1.74502	0.351765	88	88	1.27612	contigs_merge_contig_10960	0	4038	1.74502	0.351765	1.27612	0.677503	0.945511	-0.5617	43	43	0.677503	contigs_merge_contig_10960	0	4038	0.945511	-0.5617	0.677503
contigs_merge_contig_10961	0.0178372	0.0178372	0.0178372	1.08651	0.119703	0.119703	0.119703	0.947453	0.0306956	0.0306956	0.0306956	1.10887	3.06956e-08	1.10887	0.0398078	0.968246	1	3.06956e-08	1.10887	0.0398078	0.968246	1	0.206185	0.281946	-2.27799	1	1	0.206185	contigs_merge_contig_10961	0	284	0.281946	-2.27799	0.206185	0.224022	0.312641	-2.15829	1	1	0.224022	contigs_merge_contig_10961	0	284	0.312641	-2.15829	0.224022
contigs_merge_contig_10962	0.0975224	0.0975224	0.0975224	1.24173	0.312348	0.312348	0.312348	0.761489	0.147454	0.147454	0.147454	1.26728	1.47454e-07	1.26728	0.131844	0.895108	1	1.47454e-07	1.26728	0.131844	0.895108	1	0.403441	0.551681	-1.30957	14	14	0.403441	contigs_merge_contig_10962	0	2032	0.551681	-1.30957	0.403441	0.500963	0.699135	-0.997224	16	16	0.500963	contigs_merge_contig_10962	0	2032	0.699135	-0.997224	0.500963
contigs_merge_contig_10963	5.14648	5.14648	5.14648	1.45297	0.539002	0.539002	0.539002	1.15373	7.50207	7.50207	7.50207	1.48287	7.50207e-06	1.48287	1.2079	0.227085	1	7.50207e-06	1.48287	1.2079	0.227085	1	11.3617	15.5365	3.50611	169	169	11.3617	contigs_merge_contig_10963	0	871	15.5365	3.50611	11.3617	16.5082	23.0385	4.04511	226	226	16.5082	contigs_merge_contig_10963	0	871	23.0385	4.04511	16.5082
contigs_merge_contig_10964	0.691761	0.691761	0.691761	1.67156	0.741191	0.741191	0.741191	18.3308	0.994396	0.994396	0.994396	1.70595	9.94396e-07	1.70595	0.509341	0.610514	1	9.94396e-07	1.70595	0.509341	0.610514	1	1.03009	1.40858	0.0427673	13	13	1.03009	contigs_merge_contig_10964	0	739	1.40858	0.0427673	1.03009	1.72185	2.40298	0.783958	18	20	1.72185	contigs_merge_contig_10964	0	739	2.40298	0.783958	1.72185
contigs_merge_contig_10965	0.145835	0.145835	0.145835	2.17302	1.1197	1.1197	1.1197	0.627737	0.207023	0.207023	0.207023	2.21774	2.07023e-07	2.21774	0.279905	0.77955	1	2.07023e-07	2.21774	0.279905	0.77955	1	0.124324	0.170005	-3.00783	1	1	0.124324	contigs_merge_contig_10965	0	471	0.170005	-3.00783	0.124324	0.270158	0.377028	-1.88812	2	2	0.270158	contigs_merge_contig_10965	0	471	0.377028	-1.88812	0.270158
[truncated: 51,954 more rows]
